# Supplementary material for: Computational prediction of furin cleavage sites by a hybrid method and understanding mechanism underlying diseases
Source: PubMed Central journal article supplement — Sci Rep. 2012 Feb 16;2:261. doi: 10.1038/srep00261 (PMC3281273; doi:10.1038/srep00261), 2012-02-16
Supplement: srep00261-s1.pdf [file srep00261-s1.pdf]

## **Computational prediction of furin cleavage sites by a hybrid method and understanding mechanism underlying diseases**

Sun Tian<sup>1,2,\*,#,\$</sup>, Wang Huajun<sup>2</sup>, Jianhua Wu<sup>1,\*</sup>

1. Institute of Biomechanics, School of Bioscience and Bioengineering, South China University of Technology, Guangzhou Higher Education Mega Centre, Panyu Distric, Guangzhou 510640, China
2. Nuolan Net, Amsterdam, The Netherlands

# Visiting scientist at Institute of Biomechanics

\$ Present address: Agendia NV, Science Park 406, Amsterdam, The Netherlands

\* Author to whom correspondence should be addressed; Tel.: 00862039380608; Fax: 00862039380607 E-Mails: [sun.tian@nuolan.net](mailto:sun.tian@nuolan.net), [wujianhua@scut.edu.cn](mailto:wujianhua@scut.edu.cn)

- Supplemental Information table 1. List of cross validation scores of 131 furin cleavage sites
- Supplemental Information table 2. List of testing scores of 4265 negative arginine sites

**Table 1.** List of cross validation scores of 131 furin cleavage sites

| <b>Protein</b> | <b>Seq_P1_P14</b> | <b>Seq_P1_P6</b> | <b>Score</b> |
|----------------|-------------------|------------------|--------------|
| ADAM9          | EEHPSVTQLLRRR     | AVLPQT           | 14.94047     |
| ADAM15         | DLLLEQHHAHRLKR    | DVVTET           | 15.71848     |
| ADAM19         | FTQQTKKRPRRMKR    | EDLNSM           | 13.29331     |
| ADAM19         | ALQFTQQTKKRPRR    | MKREDL           | 10.50773     |
| ADAMTS1        | VGQPTGTGSIRKKR    | FVSSHR           | 16.62154     |
| ADAMTS1        | AGKPSGPGSIRKKR    | FVSSPR           | 16.73845     |
| ADAMTS4        | PLGSPSPRPRRAKR    | FASLSR           | 17.88548     |
| ADAMTS4        | VKAPLGSPSPRPRR    | AKRFAS           | 11.15068     |
| ADAMTS9        | EPFPTNVHFKRTRR    | SINSAT           | 12.40976     |
| ADAMTS9        | DEEEQNKPPIIYRR    | SAPQRE           | 5.35001      |
| ADAMTS9        | DNTREKRTHRRTKR    | FLSYPR           | 19.75621     |
| BACE1          | SGLAGPPLGLRLPR    | ETDEES           | 1.827209     |
| BMP1           | GACGRWRGRSRSRR    | AATSRP           | 20.81298     |
| COL5A1         | VIQPLPIQASRTRR    | NIDASQ           | 13.53083     |
| COL23A1        | REKLDGVAKLRTVR    | EAPSEC           | 6.132587     |
| COL25A1        | QKSYEHMAKIRIAR    | EAPSEC           | 10.67178     |
| DAG1           | IANKKPPLPKRVRR    | QIHATP           | 14.14822     |
| SOD3           | WERQAREHSERKKR    | RRESEC           | 3.004285     |
| FBN1           | CKINGYPKRGRKRR    | STNETD           | 20.23546     |
| ITGA3          | DPGDRPSSPQRRRR    | QLDPGG           | 13.70687     |
| ITGA4          | EAAYHLGPHVISKR    | STEEFP           | 9.827482     |
| ITGA5          | ELDPEGLHHQQKR     | EAPSR            | -11.7429     |
| ITGA6          | SLNLTESHNSRKKR    | EITEKQ           | 14.98387     |
| ITGAV          | VAGQGERDHLITKR    | DLALSE           | 8.807277     |
| MMP2           | DLDQNTIETMRKPR    | CGNPDV           | 2.055306     |
| MMP3           | KLSDTLEVMRKPR     | CGVPDV           | 0.000506     |
| MMP14          | KFGAEIKANVRRKR    | YAIQGL           | 9.587921     |
| MMP16          | QTRGSSKFHIRRKR    | YALTGQ           | 12.5147      |
| MMP28          | LLAGHRAKMRRKKR    | FAKPGN           | 14.10756     |
| REN2           | MTRLSAEWDVRTKR    | SSLTDL           | 11.87561     |
| MMP11          | DLPDVLNARNRQKR    | FVLSGG           | 15.43407     |
| MMP11          | DPSDGLSARNRQKR    | FVLSGG           | 15.73024     |
| VTN            | HSRGRNQNSRRPSR    | ATWLSL           | 9.939387     |
| ZP1            | CSTACSTGTTRQRR    | SSGHRN           | 16.12255     |
| ZP2            | LCSVTCPVSSRHRR    | ATGATE           | 14.85488     |
| ZP3            | VMSQWSRSASRNRR    | HVTEEA           | 12.98204     |
| SCG5           | LYEKMKGGRKRR      | SVNPYL           | 20.60375     |
| NGF            | HGTIPFNTRHRSKR    | SSTHPV           | 18.33912     |
| bmp4           | QTKTYQGKHVRISR    | SLLPQE           | 8.283003     |
| bmp4           | HDGRGHALTRRSKR    | SPKQQR           | 19.98116     |

|         |                |        |          |
|---------|----------------|--------|----------|
| EDN1    | PTSPPPWRLRRSKR | CSCSSL | 17.23658 |
| EDA     | EKPYSEESRRVRR  | NKRSKS | 14.61408 |
| EDA     | YSEESRRVRRNKR  | SKSNEG | 15.58528 |
| EDN1    | HVVPYGLGSPRSKR | ALENLL | 14.9942  |
| EDN1    | CIYQQLVRGRKIRR | SSEEHL | 14.5105  |
| EDN1    | ENLLPTKATDRENR | CQCASQ | -29.9896 |
| GHRH    | ---LPPSPFFRMQR | HVDAIF | -4.166   |
| IGF1    | LKPAKSARSVRAQR | HTDMPK | 3.337349 |
| IGF1    | EMYCAPLKPASAR  | SVRAQR | 0.582211 |
| IGF2    | QYDTWKQSTQRLRR | GLPALL | 12.61183 |
| NPPB    | DQGPTKELLKRVLR | SQDSAF | 8.737176 |
| NPPC    | GGANLKGDRSLLR  | DLRVDT | 11.29521 |
| PDGFA   | HVPEKRPLPIRRKR | SIEEAV | 17.52292 |
| PDGFB   | HSGGELESLARGRR | SLGSLT | 13.91391 |
| PTH     | -----KSVKKR    | SVSEIQ | 15.65579 |
| SEMA3A  | CSRYFPTAKRRTRR | QDIRNG | 14.18814 |
| CXCL10  | KNLLKAVSKERSKR | SP---- | 15.59723 |
| CXCL10  | KNLMKAFSQKRSKR | AP---- | 16.24035 |
| TGFB1   | LERAQHLQSSRHRR | ALDTNY | 17.04995 |
| TGFB2   | YRLESQQTNRRKKR | ALDAAY | 19.50326 |
| TNFSF13 | LEAWENGERSRKR  | AVLTQK | 20.73169 |
| VEGFC   | KLDVYRQVHSIIRR | SLPATL | 11.43804 |
| FIGF    | TSMDSRSASHRSTR | FAATFY | 8.74284  |
| FIGF    | LPTAPRHPYSIIRR | SIQIPE | -8.74228 |
| ALB     | -----RGVFRR    | DAHKSE | 10.1178  |
| ALB     | -----SRGVFRR   | EAHKSE | 10.12038 |
| F10     | PYPCKGQTLERRKR | SVAQAT | 14.75181 |
| F9      | DHENANKILNRPKR | YNSGKL | 5.952127 |
| C3      | AELQCPQPAARRRR | SVQLTE | 18.69679 |
| PROC    | PWKRMEKKRSHLKR | DTEDQE | 7.46955  |
| PROC    | ----AHQVLRIRKR | ANSFLE | 9.903292 |
| VWF     | DAVLSSPLSHRSKR | SLSCRP | 18.90187 |
| MET     | MPLECILTEKRKKR | STKKEV | 11.75171 |
| INSR    | GTGAEDPRPSRKRR | SLGDVG | 20.97373 |
| LRP1    | PPAAPPTTSNRHRR | QIDRGV | 11.35441 |
| NOTCH1  | SLLPGTSGGRQRR  | ELDPMD | 15.43339 |
| LRP8    | ATASSTARTARMRR | PSSAGE | 6.656723 |
| SORT1   | AAGGAFPRGGRWRR | SAPGED | 10.85133 |
| SCNN1A  | SYTRQAGRRRSTR  | DLRGAL | 14.31956 |
| SCNN1A  | LRTPPPPNPARSAR | SASSSV | 12.42848 |
| SCNN1G  | GVKDVLDSTPRKRR | EAGSMR | 15.92044 |
| FURIN   | GDYYHFWHRGVTKR | SLSPHR | 14.40035 |
| FURIN   | QWLEQQVAKRRTKR | DVYQEP | 19.96586 |

|                                  |                 |        |          |
|----------------------------------|-----------------|--------|----------|
| FURIN                            | KWLEQQVAKRRRAKR | DIYQEP | 15.50765 |
| FURIN                            | GDYYHFWHRAVTKR  | SLSPHR | 14.41403 |
| LOC682824                        | VCELPPQAQQSRTRR | SSPRL  | 16.84348 |
| NAGPA                            | LLLPPYPRARARLPR | DCTRVR | 5.879173 |
| PCSK9                            | FENVPEEDGTRFHR  | QASKCD | 1.195354 |
| PCSK1N                           | APLVETSTPLRLRR  | AVPRGE | 14.91889 |
| PCSK1N                           | SEPEAAPARRLRR   | SVDQDL | 21.26483 |
| ITM2B                            | KLQRRETIKGIQKR  | EASNCF | 11.5479  |
| env                              | SLAPVPPPATRRRR  | AVPIAV | 14.44741 |
| env                              | LSTASSAPTRVRR   | SPVAAL | 13.53931 |
| env                              | PVKRYSSAPVRNKR  | GVFVLG | 12.06922 |
| G                                | YTSSCRPLKRRRR   | DTQQIE | 17.62639 |
| env                              | PTKAKRRVVQREKR  | AVGIGA | 9.437884 |
| env                              | RPNNNTRKRIRIQR  | GPGRAF | 9.315477 |
| F                                | KKTNVTLTKRKRKR  | FLGFLL | 17.68826 |
| F                                | QESVTTSGGRRQKR  | FIGAII | 16.60673 |
| F                                | NQESNENTDPRTKR  | FFGGVI | 2.386676 |
| F                                | QESVTTSGGRRQRR  | FIGAII | 16.33423 |
| F                                | RPVQSVASSRRHHR  | FAGVVL | 17.41512 |
| M segment                        | VQDTHPSPTNRSKR  | NLKMEI | 12.36564 |
| UL55                             | ANRSSLNITHRTRR  | STSDNN | 18.82365 |
| GP                               | GVAGLITGGRRTTRR | EAIVNA | 17.17281 |
| GP                               | KVADSLSPTRKQKR  | SVRQNT | 15.43975 |
| HbeAg                            | RSPRRRTPSPRRRR  | SQSPRR | 15.60429 |
| HbeAg                            | STLPETTIVRRRGR  | SPRRRT | 7.591294 |
| HA                               | ATGPRNVPQRRKKR  | GLFGAK | 17.95391 |
| HA                               | TGLRNTPQRKRKKR  | GLFGAM | 18.91011 |
| HA                               | LRNTPQRERRRKKR  | GLFGAI | 19.85995 |
| HA                               | MKNVPEPSKRKKR   | GLFGAI | 17.62342 |
| MC054L                           | PENADAAGARRRRR  | GAPTSP | 18.85569 |
| L2                               | ----MARAKRVKR   | DSVTHI | 17.11826 |
| L2                               | --MRSKRSTKRTKR  | ASATQL | 19.1927  |
| L2                               | --MRHKRSKRRTKR  | ASATQL | 19.0565  |
| L2                               | ---MAHSRARRRKR  | ASATQL | 20.20795 |
| L2                               | ----MSARKRVKR   | ASAYDL | 18.67323 |
| L2                               | ----MVARSRKRR   | AAPQDI | 20.60137 |
| L2                               | ---MVSHRAARRKR  | ASVTDL | 16.22031 |
| polyprotein                      | YGRCGKQEGSRTRR  | SVLIPS | 19.13898 |
| GP                               | SSTAQHLYVFRKR   | SILWRE | 9.708276 |
| Structural polyprotein<br>(P130) | NAILRCGSSGRSKR  | SVIDDF | 18.40543 |
| Structural polyprotein<br>(P130) | QAALTCRNGTRHRR  | SVSQHF | 16.33369 |

|                  |                |        |          |
|------------------|----------------|--------|----------|
| tat              | LGISYGRKKRRQRR | RPPQGS | 14.14833 |
| aerA             | PVPLAADSKVRRAR | SVDGAG | 14.41061 |
| alpha-toxin      | KEIPLPDKKRRGKR | SVDSL  | 19.80533 |
| diphtheria toxin | EYMAQACAGNRVRR | SVGSSL | 16.134   |
| eta              | HLPLETFTRHRQPR | GWEQLE | 5.339187 |
| pagA             | PELKQKSSNSRKKR | STSAGP | 17.3112  |
| stxA             | LILNCHHHRVAR   | MASDEF | 0.984556 |

**Table 2.** List of testing scores of 4265 negative arginine sites

| <b>Protein</b>            | <b>R_pos</b> | <b>Seq_P1_P14</b> | <b>Seq_P1_P6</b> | <b>Score</b> |
|---------------------------|--------------|-------------------|------------------|--------------|
| >gi 341940188 sp Q61072.2 | 31           | LACGLLGPVLEAGR    | PDLEQT           | -37.82       |
| >gi 341940188 sp Q61072.2 | 50           | TVHLSSYEIITPWR    | LTRERR           | -41.699      |
| >gi 341940188 sp Q61072.2 | 53           | LSSYEIITPWRLTR    | ERREAL           | -17.898      |
| >gi 341940188 sp Q61072.2 | 55           | SYEITPWRLTRER     | REALGP           | -27.278      |
| >gi 341940188 sp Q61072.2 | 56           | YEIITPWRLTRERR    | EALGPS           | 12.252       |
| >gi 341940188 sp Q61072.2 | 83           | IQAQGKQHIIHLER    | NTDLLP           | -33.173      |
| >gi 341940188 sp Q61072.2 | 117          | LSDHPNVQSHCHYR    | GYVEGV           | -35.404      |
| >gi 341940188 sp Q61072.2 | 137          | QNSAVAVSACFGLR    | GLLHLE           | -33.652      |
| >gi 341940188 sp Q61072.2 | 174          | IFYPMDGIHQEPLR    | CGVSNR           | -31.912      |
| >gi 341940188 sp Q61072.2 | 180          | GIHQEPLRCGVSNR    | DTEKEG           | -24.703      |
| >gi 341940188 sp Q61072.2 | 202          | GDEEHPSVTQLLR     | RRRAVL           | -28.389      |
| >gi 341940188 sp Q61072.2 | 203          | DEEHPSVTQLLRR     | RRAVLP           | -21.877      |
| >gi 341940188 sp Q61072.2 | 204          | EEHPSVTQLLRRR     | RAVLPQ           | -16.937      |
| >gi 341940188 sp Q61072.2 | 212          | QLLRRRRAVLPQTR    | YVELFI           | -25.556      |
| >gi 341940188 sp Q61072.2 | 224          | TRYVELFIVVDKER    | YDMMGR           | -41.821      |
| >gi 341940188 sp Q61072.2 | 230          | FIVVDKERYDMMGR    | NQTAVR           | -38.612      |
| >gi 341940188 sp Q61072.2 | 236          | ERYDMMGRNQTAVR    | EEMIRL           | -36.256      |
| >gi 341940188 sp Q61072.2 | 241          | MGRNQTAVREEMIR    | LANYLD           | -36.187      |
| >gi 341940188 sp Q61072.2 | 256          | ANYLDSMYIMLNIR    | IVLVGL           | -38.992      |
| >gi 341940188 sp Q61072.2 | 268          | IRIVLVGLEIWTDR    | NPINII           | -44.04       |
| >gi 341940188 sp Q61072.2 | 288          | GGAGDVLGNFVQWR    | EKFLIT           | -29.125      |
| >gi 341940188 sp Q61072.2 | 295          | GNFVQWREKFLITR    | WRHDSA           | -31.528      |
| >gi 341940188 sp Q61072.2 | 297          | FVQWREKFLITRWR    | HDSAQL           | -30.841      |
| >gi 341940188 sp Q61072.2 | 324          | GTAGMAFVGTVCSR    | SHAGGI           | -31.548      |
| >gi 341940188 sp Q61072.2 | 361          | ELGHNLGMNHDDGR    | ECFCGA           | -38.607      |
| >gi 341940188 sp Q61072.2 | 380          | AKSCIMNSGASGSR    | NFSSCS           | -30.55       |
| >gi 341940188 sp Q61072.2 | 474          | CKDCQFLPGGSMCR    | GKTSEC           | -31.37       |
| >gi 341940188 sp Q61072.2 | 537          | CQVIFGSKAKAAPR    | DCFIEV           | -21.609      |
| >gi 341940188 sp Q61072.2 | 549          | PRDCFIEVNSKGDR    | FGNCGF           | -27.292      |
| >gi 341940188 sp Q61072.2 | 596          | VFGIVPAIIQTPSR    | GTKCWG           | -34.638      |
| >gi 341940188 sp Q61072.2 | 630          | VNEGTKCDAGKICR    | NFQCVN           | -23.906      |
| >gi 341940188 sp Q61072.2 | 696          | DSGPTYNAKSTALR    | DGLLVF           | -22.267      |
| >gi 341940188 sp Q61072.2 | 720          | VPLVAAAIFLFIKR    | DELRKT           | -27.042      |
| >gi 341940188 sp Q61072.2 | 724          | AAAIFLFIKRDEL     | KTFRKK           | -25.879      |
| >gi 341940188 sp Q61072.2 | 728          | FLFIKRDELKTFR     | KKRSQM           | -20.615      |
| >gi 341940188 sp Q61072.2 | 731          | IKRDELKTFRKKR     | SQMSDG           | 14.088       |
| >gi 341940188 sp Q61072.2 | 738          | KTFRKKRSQMSDGR    | NQANVS           | -37.778      |
| >gi 341940188 sp Q61072.2 | 745          | SQMSDGRNQANVSR    | QPGDPS           | -26.813      |
| >gi 341940188 sp Q61072.2 | 754          | ANVSRQPGDPSISR    | PPGGPN           | -34.666      |
| >gi 341940188 sp Q61072.2 | 763          | PSISRPPGGPNVSR    | PPGGPG           | -27.7        |

|                           |     |                |        |         |
|---------------------------|-----|----------------|--------|---------|
| >gi 341940188 sp Q61072.2 | 772 | PNVSRPPGGPGVSR | PPGGPG | -26.97  |
| >gi 341940188 sp Q61072.2 | 781 | PGVSRPPGGPGVSR | PPGGPG | -26.97  |
| >gi 341940188 sp Q61072.2 | 790 | PGVSRPPGGPGVSR | PPPGHG | -27.216 |
| >gi 341940188 sp Q61072.2 | 798 | GPGVSRPPPGHGNR | FPVPTY | -11.22  |
| >gi 341940188 sp Q61072.2 | 815 | PTYAAKQPAQFPSR | PPPPQP | -30.24  |
| >gi 341940188 sp Q61072.2 | 833 | QPKISSQGNLIPAR | PAPAPP | -21.996 |
| >gi 3273478 gb AAC61896.1 | 39  | IGGTEEEQASPER  | TLSGSM | -38.465 |
| >gi 3273478 gb AAC61896.1 | 48  | ASPERTLSGSMESR | VVQDSP | -30.002 |
| >gi 3273478 gb AAC61896.1 | 71  | LADVLQTGLPEALR | ISLELD | -36.742 |
| >gi 3273478 gb AAC61896.1 | 89  | LDSESHVLELLQNR | DLIPGR | -31.84  |
| >gi 3273478 gb AAC61896.1 | 95  | VLELLQNRDLIPGR | PTLVWY | -29.989 |
| >gi 3273478 gb AAC61896.1 | 107 | GRPTLVWYQPDGTR | MVSEGY | -34.24  |
| >gi 3273478 gb AAC61896.1 | 121 | MVSEGYSLENCYR  | GRVQGH | -44.234 |
| >gi 3273478 gb AAC61896.1 | 123 | SEGYSLENCYRGR  | VQGHPS | -37.358 |
| >gi 3273478 gb AAC61896.1 | 141 | PSSWVSLCACSGIR | GLIVLS | -35.805 |
| >gi 3273478 gb AAC61896.1 | 150 | CSGIRGLIVLSPER | GYTLEL | -42.499 |
| >gi 3273478 gb AAC61896.1 | 163 | RGYTLELGPGLQR  | PVISRI | -30.124 |
| >gi 3273478 gb AAC61896.1 | 168 | ELGPGDLQRPVISR | IQDHLL | -21.532 |
| >gi 3273478 gb AAC61896.1 | 190 | HTCAPSWHASVPTR | AGPDLL | -19.677 |
| >gi 3273478 gb AAC61896.1 | 204 | AGPDLLLEQHHAHR | LKRDVV | -28.224 |
| >gi 3273478 gb AAC61896.1 | 228 | IVELVIVADNSEVR | KYPDFQ | -44.119 |
| >gi 3273478 gb AAC61896.1 | 239 | EVRKYPDFQQLNR  | TLEAAL | -34.194 |
| >gi 3273478 gb AAC61896.1 | 257 | ALLLDTFFQPLNVR | VALVGL | -35.993 |
| >gi 3273478 gb AAC61896.1 | 287 | MSSNPAVLLDNFLR | WRRTDL | -44.742 |
| >gi 3273478 gb AAC61896.1 | 289 | SNPAVLLDNFLRWR | RTDLLP | -33.896 |
| >gi 3273478 gb AAC61896.1 | 290 | NPAVLLDNFLRWRR | TDLLPR | -1.946  |
| >gi 3273478 gb AAC61896.1 | 296 | DNFLRWRRTDLLPR | LPHDSA | -36.108 |
| >gi 3273478 gb AAC61896.1 | 396 | TDFLPGLNFSNCSR | QALEKA | -34.562 |
| >gi 3273478 gb AAC61896.1 | 414 | KALLEGMGSCLFER | QPSLAP | -42.71  |
| >gi 3273478 gb AAC61896.1 | 457 | CTDPCCDHFTCQLR | PGAQCA | -34.461 |
| >gi 3273478 gb AAC61896.1 | 482 | CQNCKLHPAGWLCR | PPTDDC | -32.2   |
| >gi 3273478 gb AAC61896.1 | 506 | FCPGDSSQCPSDIR | LGDGEP | -37.742 |
| >gi 3273478 gb AAC61896.1 | 524 | EPCASGEAVCMHGR | CASYAR | -34.044 |
| >gi 3273478 gb AAC61896.1 | 530 | EAVCMHGRCASYAR | QCQSLW | -36.769 |
| >gi 3273478 gb AAC61896.1 | 554 | QPAAPLCLQTANTR | GNAFGS | -31.272 |
| >gi 3273478 gb AAC61896.1 | 563 | TANTRGNAFGSCGR | SPGGSY | -32.282 |
| >gi 3273478 gb AAC61896.1 | 575 | GRSPGGSYMPCAPR | DVMCGQ | -26.828 |
| >gi 3273478 gb AAC61896.1 | 588 | RDVMCGQLQCQWGR | SQPLLG | -33.339 |
| >gi 3273478 gb AAC61896.1 | 599 | WGRSQPLGQSVQDR | LSEVLE | -31.727 |
| >gi 3273478 gb AAC61896.1 | 646 | GTACGPGLVCIGHR | CQPVDL | -30.613 |
| >gi 3273478 gb AAC61896.1 | 659 | RCQPVDLLGAQECR | RKCHGH | -31.55  |
| >gi 3273478 gb AAC61896.1 | 660 | CQPVDLLGAQECRR | KCHGHG | -34.546 |
| >gi 3273478 gb AAC61896.1 | 675 | CHGHGVCDSGHCRR | CEEGWA | -36.594 |

|                           |     |                  |         |         |
|---------------------------|-----|------------------|---------|---------|
| >gi 3273478 gb AAC61896.1 | 719 | LLVLVLLGASYWHR   | ARLHQR  | -29.102 |
| >gi 3273478 gb AAC61896.1 | 721 | VLVLLGASYWHRAR   | LHQRLC  | -34.533 |
| >gi 3273478 gb AAC61896.1 | 725 | LGASYWHRARLHQR   | LCQLKG  | -25.917 |
| >gi 3273478 gb AAC61896.1 | 737 | QRLCQLKGSSCQYR   | APQSCP  | -27.052 |
| >gi 3273478 gb AAC61896.1 | 746 | SCQYRAPQSCPPER   | PGPPQR  | -42.321 |
| >gi 3273478 gb AAC61896.1 | 752 | PQSCPPERPGPPQR   | AQQMTG  | -23.123 |
| >gi 3273478 gb AAC61896.1 | 771 | GTKSQGPTKPPPPR   | KPLPAN  | -26.285 |
| >gi 3273478 gb AAC61896.1 | 802 | GPGDGSPLLVVPSR   | PAPPPP  | -22.499 |
| >gi 302393821 sp Q9H013.3 | 21  | ARLCLLAFALQPLR   | PRAARE  | -29.352 |
| >gi 302393821 sp Q9H013.3 | 23  | LCLLAFALQPLRPR   | AAREPG  | -22.017 |
| >gi 302393821 sp Q9H013.3 | 26  | LAFALQPLRPRAAR   | EPGWTR  | 9.25    |
| >gi 302393821 sp Q9H013.3 | 32  | PLRPRAAREPGWTR   | GSEEGS  | -32.339 |
| >gi 302393821 sp Q9H013.3 | 58  | LIIPQWKTSSESPVR  | EKHPLK  | -30.862 |
| >gi 302393821 sp Q9H013.3 | 68  | SPVREKHPLKAE LR  | VMAEGR  | -33.943 |
| >gi 302393821 sp Q9H013.3 | 74  | HPLKAE LR VMAEGR | ELILD L | -29.204 |
| >gi 302393821 sp Q9H013.3 | 107 | THYTSSGNPQT TTR  | KLEDHC  | -29.677 |
| >gi 302393821 sp Q9H013.3 | 120 | RKLEDHCFYHGTVR   | ETELSS  | -23.155 |
| >gi 302393821 sp Q9H013.3 | 133 | RETELSSVTLSTCR   | GIRGLI  | -29.768 |
| >gi 302393821 sp Q9H013.3 | 136 | ELSSVTLSTCRGIR   | GLITVS  | -22.338 |
| >gi 302393821 sp Q9H013.3 | 163 | EPLPDSKGQH LIYR  | SEHLKP  | -21.814 |
| >gi 302393821 sp Q9H013.3 | 184 | PGNCGFEHSKPTTR   | DWALQF  | -20.782 |
| >gi 302393821 sp Q9H013.3 | 197 | RDWALQFTQQTKKR   | PRRMKR  | -23.234 |
| >gi 302393821 sp Q9H013.3 | 199 | WALQFTQQTKKRPR   | RMKRED  | -2.599  |
| >gi 302393821 sp Q9H013.3 | 227 | LYLVADYLEFQKNR   | RDQDAT  | -35.651 |
| >gi 302393821 sp Q9H013.3 | 228 | YLVADYLEFQKNRR   | DQDATK  | 0.467   |
| >gi 302393821 sp Q9H013.3 | 249 | KLIEIANYVDKFYR   | SLNIRI  | -24.647 |
| >gi 302393821 sp Q9H013.3 | 254 | ANYVDKFYRSLNIR   | IALVGL  | -28.767 |
| >gi 302393821 sp Q9H013.3 | 286 | ENPYSTLWSFLSWR   | RKLLAQ  | -34.138 |
| >gi 302393821 sp Q9H013.3 | 287 | NPYSTLWSFLSWRR   | KLLAQK  | -28.451 |
| >gi 302393821 sp Q9H013.3 | 389 | TGHPFPKVFNGCNR   | RELDRY  | -39.563 |
| >gi 302393821 sp Q9H013.3 | 390 | GHPFPKVFNGCNR    | ELDRYL  | -16.444 |
| >gi 302393821 sp Q9H013.3 | 394 | PKVFNGCNRRELD R  | YLQSGG  | -22.583 |
| >gi 302393821 sp Q9H013.3 | 411 | SGGGMCLSNMPDTR   | MLYGGR  | -36.978 |
| >gi 302393821 sp Q9H013.3 | 417 | LSNMPDTRMLYGG R  | RCGNGY  | -34.835 |
| >gi 302393821 sp Q9H013.3 | 418 | SNMPDTRMLYGGRR   | CGNGYL  | -25.319 |
| >gi 302393821 sp Q9H013.3 | 451 | CNNPCCNASNCTLR   | PGAECA  | -29.677 |
| >gi 302393821 sp Q9H013.3 | 475 | CHQCKLLAPGTLCR   | EQARQC  | -30.042 |
| >gi 302393821 sp Q9H013.3 | 479 | KLLAPGTLCREQAR   | QC DLPE | -29.557 |
| >gi 302393821 sp Q9H013.3 | 534 | YQECCQLWGPGAR    | PAPDLC  | -32.551 |
| >gi 302393821 sp Q9H013.3 | 563 | TFGNC GKDMNGEHR  | KCNMRD  | -35.617 |
| >gi 302393821 sp Q9H013.3 | 568 | GKDMNGEHRKCNMR   | DAKCGK  | -18.027 |
| >gi 302393821 sp Q9H013.3 | 583 | AKCGKIQCQSSEAR   | PLESNA  | -27.304 |
| >gi 302393821 sp Q9H013.3 | 601 | NAVPIDTTIIMNGR   | QIQCRG  | -34.097 |



|                           |     |                 |        |         |
|---------------------------|-----|-----------------|--------|---------|
| >gi 302393821 sp Q9H013.3 | 606 | DTTIIMNGRQIQCR  | GTHVYR | -17.719 |
| >gi 302393821 sp Q9H013.3 | 612 | NGRQIQCRGTHVYR  | GPEEEG | -12.831 |
| >gi 302393821 sp Q9H013.3 | 644 | KCGYNHICFEGQCR  | NTSFFE | -39.613 |
| >gi 302393821 sp Q9H013.3 | 725 | LVLAVLMLMYCCR   | QNNKLG | -46.558 |
| >gi 302393821 sp Q9H013.3 | 743 | LGQLKPSALPSKLR  | QQFSCP | -26.23  |
| >gi 302393821 sp Q9H013.3 | 751 | LPSKLRQQFSCPFR  | VSQNSG | -38.683 |
| >gi 302393821 sp Q9H013.3 | 774 | ANPTFKLQTPQGKR  | KVINTP | -20.057 |
| >gi 302393821 sp Q9H013.3 | 784 | QGKRKVINTPEILR  | KPSQPP | -34.614 |
| >gi 302393821 sp Q9H013.3 | 792 | TPEILRKPSQPPPR  | PPPDYL | -27.066 |
| >gi 302393821 sp Q9H013.3 | 799 | PSQPPRPPPDYLR   | GGSPA  | -31.502 |
| >gi 302393821 sp Q9H013.3 | 813 | GGSPAPLPAHLSR   | AARNSP | -6.131  |
| >gi 302393821 sp Q9H013.3 | 816 | PPAPLPAHLSRAAR  | NSPGPG | 0.71    |
| >gi 302393821 sp Q9H013.3 | 827 | AARNSPGPGSQIER  | TESSRR | -40.703 |
| >gi 302393821 sp Q9H013.3 | 832 | PGPGSQIERTESSR  | RPPPSR | -23.618 |
| >gi 302393821 sp Q9H013.3 | 833 | GPGSQIERTESSRR  | PPPSRP | -20.275 |
| >gi 302393821 sp Q9H013.3 | 838 | IERTESSRRPPPSR  | PIPPAP | -22.283 |
| >gi 302393821 sp Q9H013.3 | 854 | PPAPNCIVSQDFSR  | PRPPQK | -38.799 |
| >gi 302393821 sp Q9H013.3 | 856 | APNCIVSQDFSRPR  | PPQKAL | -34.665 |
| >gi 302393821 sp Q9H013.3 | 870 | PPQKALPANVPVGR  | RSLPRP | -24.186 |
| >gi 302393821 sp Q9H013.3 | 871 | PQKALPANVPVGRR  | SLPRPG | -11.603 |
| >gi 302393821 sp Q9H013.3 | 875 | LPANVPVPGRRSLPR | PGGASP | -17.329 |
| >gi 302393821 sp Q9H013.3 | 883 | RRSLPRPGGASPLR  | PPGAGP | -27.686 |
| >gi 302393821 sp Q9H013.3 | 893 | SPLRPPGAGPQQSR  | PLAALA | -23.738 |
| >gi 302393821 sp Q9H013.3 | 905 | SRPLAALAPKVSPR  | EALKVK | 1.015   |
| >gi 302393821 sp Q9H013.3 | 915 | VSPREALKVKAGTR  | GLQGGR | -20.542 |
| >gi 302393821 sp Q9H013.3 | 921 | LKVKAGTRGLQGGR  | CRVEKT | -27.578 |
| >gi 302393821 sp Q9H013.3 | 923 | VKAGTRGLQGGR    | VEKTKQ | -37.975 |
| >gi 302393821 sp Q9H013.3 | 945 | LLVVWTELPEQKPR  | AKHSCF | -22.97  |
| >gi 12644483 sp Q9UHI8 AT | 23  | GRRKLGSDMGNAER  | APGSRS | -36.403 |
| >gi 12644483 sp Q9UHI8 AT | 28  | GSDMGNAERAPGSR  | SFGPVP | -20.616 |
| >gi 12644483 sp Q9UHI8 AT | 52  | LAAALLAVSDALGR  | PSEEDE | -35.121 |
| >gi 12644483 sp Q9UHI8 AT | 67  | SEDEELVPELER    | APGHGT | -37.062 |
| >gi 12644483 sp Q9UHI8 AT | 75  | VPELERAPGHGTTR  | LRLHAF | -32.062 |
| >gi 12644483 sp Q9UHI8 AT | 77  | ELERAPGHGTTRLR  | LHAFDQ | -32.119 |
| >gi 12644483 sp Q9UHI8 AT | 90  | RLHAFDQQLDLELR  | PDSSFL | -37.75  |
| >gi 12644483 sp Q9UHI8 AT | 107 | SFLAPGFTLQNVGR  | KSGSET | -33.765 |
| >gi 12644483 sp Q9UHI8 AT | 146 | PSSAAALSLCEGVR  | GAFYLL | -38.789 |
| >gi 12644483 sp Q9UHI8 AT | 167 | EAYFIQPLPAASER  | LATAAP | -36.659 |
| >gi 12644483 sp Q9UHI8 AT | 187 | GEKPPAPLQFHLLR  | RNRQGD | -16.675 |
| >gi 12644483 sp Q9UHI8 AT | 188 | EKPPAPLQFHLLRR  | NRQGDV | -6.137  |
| >gi 12644483 sp Q9UHI8 AT | 190 | PPAPLQFHLLRRNR  | QGDVGG | -3.235  |
| >gi 12644483 sp Q9UHI8 AT | 206 | DVGGTCGVVDDEPR  | PTGKAE | -40.869 |
| >gi 12644483 sp Q9UHI8 AT | 249 | LQGVGQPTGTGSIR  | KKRFVS | -31.141 |

|                           |     |                 |        |         |
|---------------------------|-----|-----------------|--------|---------|
| >gi 12644483 sp Q9UHI8 AT | 258 | TGSIRKKRFVSSHR  | YVETML | -26.066 |
| >gi 12644483 sp Q9UHI8 AT | 291 | LKHyllTLFSVAAR  | LYKHPS | -35.645 |
| >gi 12644483 sp Q9UHI8 AT | 299 | FSVAARLYKHPSIR  | NSVSLV | -22.738 |
| >gi 12644483 sp Q9UHI8 AT | 330 | KGPEVTSNAALTLR  | NFCNWQ | -25.952 |
| >gi 12644483 sp Q9UHI8 AT | 345 | FCNWQKQHNPSSDR  | DAEHYD | -30.867 |
| >gi 12644483 sp Q9UHI8 AT | 358 | RDAEHYDTAILFTR  | QDLCGS | -28.342 |
| >gi 12644483 sp Q9UHI8 AT | 383 | LGMADVGTVCDCPSR | SCSVIE | -40.147 |
| >gi 12644483 sp Q9UHI8 AT | 486 | LPGDLPGTSYDANR  | QCQFTF | -42.835 |
| >gi 12644483 sp Q9UHI8 AT | 551 | KWCINGKCVNKTDNR | KHFDTF | -36.292 |
| >gi 12644483 sp Q9UHI8 AT | 573 | GSWGMWGPWGDCSR  | TCGGGV | -45.202 |
| >gi 12644483 sp Q9UHI8 AT | 584 | CSRTC GGQVYTMR  | ECDNPV | -33.176 |
| >gi 12644483 sp Q9UHI8 AT | 602 | PVPKNGGKYCEGKR  | VRYSR  | -31.619 |
| >gi 12644483 sp Q9UHI8 AT | 604 | PKNGGKYCEGKRVR  | YRSCNL | -15.255 |
| >gi 12644483 sp Q9UHI8 AT | 606 | NGGKYCEGKRVR    | SCNLED | 3.386   |
| >gi 12644483 sp Q9UHI8 AT | 622 | NLEDCPDNNGKTFR  | EEQCEA | -25.304 |
| >gi 12644483 sp Q9UHI8 AT | 657 | EWIPKYAGVSPKDR  | CKLICQ | -34.633 |
| >gi 12644483 sp Q9UHI8 AT | 703 | VCVQGQCVKAGCDR  | IIDSKK | -40.238 |
| >gi 12644483 sp Q9UHI8 AT | 756 | TIPTGATNIEVKQR  | NQRGSR | -31.422 |
| >gi 12644483 sp Q9UHI8 AT | 759 | TGATNIEVKQRNQR  | GSRNNG | -7.67   |
| >gi 12644483 sp Q9UHI8 AT | 762 | TNIEVKQRNQRGSR  | NNGSFL | -7.196  |
| >gi 12644483 sp Q9UHI8 AT | 800 | TLEQDIMYKGVVLR  | YSGSSA | -4.883  |
| >gi 12644483 sp Q9UHI8 AT | 810 | VVLRYSGSSAALER  | IRSFSP | -39.475 |
| >gi 12644483 sp Q9UHI8 AT | 812 | LRYSGSSAALERIR  | SFSPLK | -31.692 |
| >gi 12644483 sp Q9UHI8 AT | 833 | PLTIQVLTVGNALR  | PKIKYT | -32.737 |
| >gi 12644483 sp Q9UHI8 AT | 876 | WGECSSCELGWQR   | RLVECR | -35.343 |
| >gi 12644483 sp Q9UHI8 AT | 877 | GECSKSCSELGWQRR | LVECRD | -18.532 |
| >gi 12644483 sp Q9UHI8 AT | 882 | SCELGWQRRLVECR  | DINGQP | -18.222 |
| >gi 12644483 sp Q9UHI8 AT | 902 | ASECAKEVKPASTR  | PCADHP | -24.743 |
| >gi 12644483 sp Q9UHI8 AT | 931 | SSCSKTCGKGYKKR  | SLKCLS | -6.915  |
| >gi 12644368 sp P97857.3  | 23  | RKQKPCSDMGDVQR  | AARSRG | -29.184 |
| >gi 12644368 sp P97857.3  | 26  | KPCSDMGDVQRAAR  | SRGSL  | -2.034  |
| >gi 12644368 sp P97857.3  | 28  | CSDMGDVQRAARSR  | GSLSAH | -16.159 |
| >gi 12644368 sp P97857.3  | 50  | LLLLASITMLLCAR  | GAHGRP | -32.308 |
| >gi 12644368 sp P97857.3  | 55  | SITMLLCARGAHGR  | PTEEDE | -22.43  |
| >gi 12644368 sp P97857.3  | 70  | TEEDEELVLSLER   | APGHDS | -31.488 |
| >gi 12644368 sp P97857.3  | 80  | SLERAPGHDSTTTR  | LRLDAF | -40.698 |
| >gi 12644368 sp P97857.3  | 82  | ERAPGHDSTTTRLR  | LDAFGQ | -32.101 |
| >gi 12644368 sp P97857.3  | 112 | GFLAPGFTLQTVGR  | SPGSEA | -25.727 |
| >gi 12644368 sp P97857.3  | 153 | PGSAAALSLCEGVR  | GAFYLQ | -38.423 |
| >gi 12644368 sp P97857.3  | 175 | EFFIQPAPGVATER  | LAPAVP | -37.84  |
| >gi 12644368 sp P97857.3  | 188 | RLAPAVPEEESSAR  | PQFHIL | -41.035 |
| >gi 12644368 sp P97857.3  | 195 | EESSARPQFHILR   | RRRRGS | -17.647 |
| >gi 12644368 sp P97857.3  | 196 | EESSARPQFHILRR  | RRRGSG | -0.339  |

|                          |     |                 |        |         |
|--------------------------|-----|-----------------|--------|---------|
| >gi 12644368 sp P97857.3 | 197 | ESSARPQFHILRRR  | RRGSGG | -2.264  |
| >gi 12644368 sp P97857.3 | 198 | SSARPQFHILRRR   | RGSGGA | 3.464   |
| >gi 12644368 sp P97857.3 | 199 | SARPQFHILRRRR   | GSGGAK | 18.579  |
| >gi 12644368 sp P97857.3 | 220 | GVMDDDELPTSDSR  | PESQNT | -38.362 |
| >gi 12644368 sp P97857.3 | 227 | LPTSDSRPESQNTR  | NQWPVR | -31.391 |
| >gi 12644368 sp P97857.3 | 233 | RPESQNTRNQWPVR  | DPTPQD | -28.197 |
| >gi 12644368 sp P97857.3 | 250 | PQDAGKPSGPGSIR  | KKRFVS | -29.896 |
| >gi 12644368 sp P97857.3 | 259 | PGSIRKKRFVSSPR  | YVETML | -25.477 |
| >gi 12644368 sp P97857.3 | 292 | LKHLLTLFSVAAR   | FYKHPS | -28.159 |
| >gi 12644368 sp P97857.3 | 300 | FSVAARFYKHPSIR  | NSISLV | -23.173 |
| >gi 12644368 sp P97857.3 | 331 | KGPEVTSNAALTLR  | NFCNWQ | -25.952 |
| >gi 12644368 sp P97857.3 | 346 | FCNWQKQHNSPSDR  | DPEHYD | -31.428 |
| >gi 12644368 sp P97857.3 | 359 | RDPEHYDTAILFTR  | QDLCGS | -28.342 |
| >gi 12644368 sp P97857.3 | 384 | LGMADVGTVCDCPSR | SCSVIE | -40.147 |
| >gi 12644368 sp P97857.3 | 487 | LPSDLPGTLYDANR  | QCQFTF | -42.655 |
| >gi 12644368 sp P97857.3 | 574 | GSWGPWGPWGDCSR  | TCGGGV | -45.074 |
| >gi 12644368 sp P97857.3 | 585 | CSRTC GG VQYTMR | ECDNPV | -33.176 |
| >gi 12644368 sp P97857.3 | 603 | PVPKNGGKYCEGKR  | VYRSC  | -31.619 |
| >gi 12644368 sp P97857.3 | 605 | PKNGGKYCEGKVR   | YRSCNI | -15.302 |
| >gi 12644368 sp P97857.3 | 607 | NGGKYCEGKRVYR   | SCNIED | 3.386   |
| >gi 12644368 sp P97857.3 | 623 | NIEDCPDNNGKTR   | EEQCEA | -25.304 |
| >gi 12644368 sp P97857.3 | 658 | EWTPKYAGVSPKDR  | CKLTCE | -34.221 |
| >gi 12644368 sp P97857.3 | 704 | VCVQGQCVKAGCDR  | IIDSCK | -40.238 |
| >gi 12644368 sp P97857.3 | 736 | STCKKMSGIVTSTR  | PGYHDI | -35.545 |
| >gi 12644368 sp P97857.3 | 757 | TIPAGATNIEVKHR  | NQRGSR | -30.114 |
| >gi 12644368 sp P97857.3 | 760 | AGATNIEVKHRNQR  | GSRNNG | -5.74   |
| >gi 12644368 sp P97857.3 | 763 | TNIEVKHRNQRGSR  | NNGSFL | -7.196  |
| >gi 12644368 sp P97857.3 | 772 | QRGSRNNGSFLAIR  | AADGTY | -28.46  |
| >gi 12644368 sp P97857.3 | 801 | TLEQDLTYKGTVLR  | YSGSSA | -20.623 |
| >gi 12644368 sp P97857.3 | 811 | TVLRYSGSSAALER  | IRSFSP | -39.349 |
| >gi 12644368 sp P97857.3 | 813 | LRYSGSSAALERIR  | SFSPLK | -31.692 |
| >gi 12644368 sp P97857.3 | 834 | PLTIQVLMVGHALR  | PKIKFT | -16.912 |
| >gi 12644368 sp P97857.3 | 877 | WGECSTCGSGWQR   | RVVQCR | -26.015 |
| >gi 12644368 sp P97857.3 | 878 | GECSKTCGSGWQRR  | VVQCRD | -18.608 |
| >gi 12644368 sp P97857.3 | 883 | TCGSGWQRRVVQCR  | DINGHP | -15.36  |
| >gi 12644368 sp P97857.3 | 903 | ASECAKEVKPASTR  | PCADLP | -25.185 |
| >gi 12644368 sp P97857.3 | 932 | SPCSKTCGKGYKKR  | TLKCVS | -15.993 |
| >gi 12643637 sp O75173.2 | 50  | LLLLLASLLPSAR   | LASPLP | -29.089 |
| >gi 12643637 sp O75173.2 | 57  | SLLPSARLASPLPR  | EEEIVF | -27.127 |
| >gi 12643637 sp O75173.2 | 80  | LNGSVLPGSGAPAR  | LLCRLQ | -29.409 |
| >gi 12643637 sp O75173.2 | 84  | VLPGSGAPARLLCR  | LQAFGE | -31.431 |
| >gi 12643637 sp O75173.2 | 156 | HWDGGALLGVLQYR  | GAELHL | -27.639 |
| >gi 12643637 sp O75173.2 | 182 | TPNSAGGPGAHILR  | RKSPAS | -12.111 |

|                          |     |                 |         |         |
|--------------------------|-----|-----------------|---------|---------|
| >gi 12643637 sp O75173.2 | 183 | PNSAGGPGAHILRR  | KSPASG  | -13.331 |
| >gi 12643637 sp O75173.2 | 206 | MCNVKAPLGSPSPR  | PRRAKR  | -26.363 |
| >gi 12643637 sp O75173.2 | 208 | NVKAPLGSPSPRPR  | RAKRFA  | -19.994 |
| >gi 12643637 sp O75173.2 | 218 | PRPRRAKRFASLSR  | FVETLV  | -26.096 |
| >gi 12643637 sp O75173.2 | 240 | DDKMAAFHGAGLKR  | YLLTVM  | -17.439 |
| >gi 12643637 sp O75173.2 | 259 | MAAAAKAFKHPSIR  | NPVSLV  | -24.261 |
| >gi 12643637 sp O75173.2 | 268 | HPSIRNPVSLVVTR  | LVILGS  | -25.42  |
| >gi 12643637 sp O75173.2 | 290 | EGPQVGPSSAAQTLR | SFCAWQ  | -20.327 |
| >gi 12643637 sp O75173.2 | 297 | SAAQTLRSFCAWQR  | GLNTPE  | -35.073 |
| >gi 12643637 sp O75173.2 | 318 | SDPDHFDTAILFTR  | QDLCGV  | -28.745 |
| >gi 12643637 sp O75173.2 | 343 | LGMADVGTVCDPAR  | SCAIVE  | -38.78  |
| >gi 12643637 sp O75173.2 | 388 | KPCISLNGPLSTSR  | HVMAPV  | -24.597 |
| >gi 12643637 sp O75173.2 | 410 | HVDPEEPWSPCSAR  | FITDFL  | -22.71  |
| >gi 12643637 sp O75173.2 | 447 | LPVTFPGKDYDADR  | QCQLTF  | -56.983 |
| >gi 12643637 sp O75173.2 | 458 | ADRQCQLTFGPDSR  | HCPQLP  | -38.11  |
| >gi 12643637 sp O75173.2 | 505 | GTPCGPAQACMGGR  | CLHMDQ  | -34.303 |
| >gi 12643637 sp O75173.2 | 534 | GGWGPWGPWGDCSR  | TCGGGV  | -45.175 |
| >gi 12643637 sp O75173.2 | 545 | CSRTC GGGVQFSSR | DCTRPV  | -29.04  |
| >gi 12643637 sp O75173.2 | 549 | CGGGVQFSSRDCTR  | PVPRNG  | -28.38  |
| >gi 12643637 sp O75173.2 | 553 | VQFSSRDCTRVPVR  | NGGKYC  | -17.509 |
| >gi 12643637 sp O75173.2 | 562 | RPVPRNGGKYCEGR  | RTRFRS  | -29.428 |
| >gi 12643637 sp O75173.2 | 563 | PVPRNGGKYCEGRR  | TRFRSC  | -27.492 |
| >gi 12643637 sp O75173.2 | 565 | PRNGGKYCEGRRTR  | FRSCNT  | -5.672  |
| >gi 12643637 sp O75173.2 | 567 | NGGKYCEGRRTRFR  | SCNTED  | -16.602 |
| >gi 12643637 sp O75173.2 | 583 | NTEDCPTGSALTFR  | EEQCAA  | -33.332 |
| >gi 12643637 sp O75173.2 | 593 | LTFREEQCAAYNHR  | TDLFKS  | -32.075 |
| >gi 12643637 sp O75173.2 | 609 | LFKSFPGPMDWVPR  | YTG VAP | -35.271 |
| >gi 12643637 sp O75173.2 | 626 | VAPQDQCKLTCQAR  | ALGYYY  | -21.884 |
| >gi 12643637 sp O75173.2 | 637 | QARALGYYYVLEPR  | VVDGTP  | -32.091 |
| >gi 12643637 sp O75173.2 | 656 | PCSPDSSSVCVQGR  | CIHAGC  | -28.033 |
| >gi 12643637 sp O75173.2 | 664 | VCVQGRCIHAGCDR  | IIGSKK  | -43.345 |
| >gi 12643637 sp O75173.2 | 693 | GDGSGCSKQSGSFR  | KFRYGY  | -37.568 |
| >gi 12643637 sp O75173.2 | 696 | SGCSKQSGSFRKFR  | YGYNNV  | -7.506  |
| >gi 12643637 sp O75173.2 | 715 | VVTIPAGATHILVR  | QQGNPG  | -10.162 |
| >gi 12643637 sp O75173.2 | 723 | THILVRQQGNPGHR  | SIYLAL  | -23.186 |
| >gi 12643637 sp O75173.2 | 760 | SPTDVVLPGAVSLR  | YSGATA  | -19.039 |
| >gi 12643637 sp O75173.2 | 795 | TLQVLVAGNPQDTR  | LRY SFF | -39.095 |
| >gi 12643637 sp O75173.2 | 797 | QVLVAGNPQDTRLR  | YSFFVP  | -35.089 |
| >gi 12643637 sp O75173.2 | 804 | PQDTRLRYSFFVPR  | PTPSTP  | -26.996 |
| >gi 12643637 sp O75173.2 | 811 | YSFFVPRPTPSTPR  | PTPQDW  | -23.413 |
| >gi 12643637 sp O75173.2 | 820 | PSTPRPTPQDWLHR  | RAQILE  | -32.15  |
| >gi 12643637 sp O75173.2 | 821 | STPRPTPQDWLHRR  | AQILEI  | -27.869 |
| >gi 12643637 sp O75173.2 | 829 | DWLHRR AQILEILR | RRPWAG  | -36.643 |

|                           |     |                 |        |         |
|---------------------------|-----|-----------------|--------|---------|
| >gi 12643637 sp O75173.2  | 830 | WLHRRRAQILEILRR | RPWAGR | -14.601 |
| >gi 12643637 sp O75173.2  | 831 | LHRRRAQILEILRRR | PWAGRK | -25.774 |
| >gi 12643637 sp O75173.2  | 836 | QILEILRRRPWAGR  | K----- | -27.977 |
| >gi 27463365 gb AAO15765. | 30  | LAEMGSPDAAAAVR  | KDRLHP | -34.134 |
| >gi 27463365 gb AAO15765. | 33  | MGSPDAAAAVRKDR  | LHPRQV | -28.339 |
| >gi 27463365 gb AAO15765. | 37  | DAAAAVRKDRLHPR  | QVKLLE | -9.977  |
| >gi 27463365 gb AAO15765. | 55  | LETLSEYEIVSPIR  | VNALGE | -35.195 |
| >gi 27463365 gb AAO15765. | 71  | ALGEPFPTNVHFKR  | TRRSIN | -13.394 |
| >gi 27463365 gb AAO15765. | 73  | GEPFPTNVHFKRTR  | RSINSA | -7.614  |
| >gi 27463365 gb AAO15765. | 101 | SSSSSTSPQAHYR   | LSAFGQ | -36.579 |
| >gi 27463365 gb AAO15765. | 177 | AVISLCSGMLGTFR  | SHDGGY | -36.743 |
| >gi 27463365 gb AAO15765. | 208 | EDEEQNKPHIYR    | RSAPQR | -10.643 |
| >gi 27463365 gb AAO15765. | 214 | NKPHIYRRSAPQR   | EPSTGR | -16.682 |
| >gi 27463365 gb AAO15765. | 220 | YRRSAPQREPSTGR  | HACDTS | -30.457 |
| >gi 27463365 gb AAO15765. | 231 | TGRHACDTSEHKNR  | HSKDKK | -13.151 |
| >gi 27463365 gb AAO15765. | 240 | EHKNRHSKDKKTR   | ARKWGE | -5.562  |
| >gi 27463365 gb AAO15765. | 242 | KNRHSKDKKTRAR   | KWGERI | -21.944 |
| >gi 27463365 gb AAO15765. | 247 | KDKKTRARKWGER   | INLAGD | -31.598 |
| >gi 27463365 gb AAO15765. | 277 | EAFSAYGNKTDNTR  | EKRTHR | -26.2   |
| >gi 27463365 gb AAO15765. | 280 | SAYGNKTDNTREKR  | THRRTK | -2.675  |
| >gi 27463365 gb AAO15765. | 283 | GNKTDNTREKRTHR  | RTKRFL | 5.001   |
| >gi 27463365 gb AAO15765. | 284 | NKTDNTREKRTHRR  | TKRFLS | -15.516 |
| >gi 27463365 gb AAO15765. | 293 | RTHRRTKRFLSYPR  | FVEVLV | -27.78  |
| >gi 27463365 gb AAO15765. | 304 | YPRFVEVLVVADNR  | MVSYHG | -34.773 |
| >gi 27463365 gb AAO15765. | 390 | PGGIHHD TAVLLTR | QDICRA | -26.321 |
| >gi 27463365 gb AAO15765. | 395 | HDTAVLLTRQDICR  | AHDKCD | -34.237 |
| >gi 27463365 gb AAO15765. | 416 | LGLAELGTICDPYR  | SCSISE | -46.55  |
| >gi 27463365 gb AAO15765. | 480 | NFYTNPWMWSKCSR  | KYITEF | -37.723 |
| >gi 27463365 gb AAO15765. | 502 | TGYGECLLNEPESR  | PYPLPV | -44.293 |
| >gi 27463365 gb AAO15765. | 539 | GPGSQVCPYMMQCR  | RLWCNN | -36.618 |
| >gi 27463365 gb AAO15765. | 540 | PGSQVCPYMMQCRR  | LWCNNV | -33.678 |
| >gi 27463365 gb AAO15765. | 554 | LWCNNVNGVHKGCR  | TQHTPW | -30.194 |
| >gi 27463365 gb AAO15765. | 602 | GSWGSWSPFGTCSR  | TCGGGI | -41.159 |
| >gi 27463365 gb AAO15765. | 613 | CSRTC GGGIKTAIR | ECNRPE | -32.135 |
| >gi 27463365 gb AAO15765. | 617 | CGGGIKTAIRECNR  | PEPKNG | -39.584 |
| >gi 27463365 gb AAO15765. | 630 | RPEPKNGGKYCVGR  | RMKFKS | -32.055 |
| >gi 27463365 gb AAO15765. | 631 | PEPKNGGKYCVGRR  | MKFKSC | -23.088 |
| >gi 27463365 gb AAO15765. | 647 | FKSCNTEPCLKQKR  | DFRDEQ | -16.413 |
| >gi 27463365 gb AAO15765. | 650 | CNTEPCLKQKRDFR  | DEQCAH | -23.618 |
| >gi 27463365 gb AAO15765. | 672 | GKHFNINGLLPNVR  | WVPKYS | -32.352 |
| >gi 27463365 gb AAO15765. | 685 | RWVPKYSGILMKDR  | CKLFCR | -41.472 |
| >gi 27463365 gb AAO15765. | 691 | SGILMKDRCKLFCR  | VAGNTA | -37.344 |
| >gi 27463365 gb AAO15765. | 702 | FCRVAGNTAYYQLR  | DRVIDG | -33.588 |

|                           |      |                |        |         |
|---------------------------|------|----------------|--------|---------|
| >gi 27463365 gb AAO15765. | 704  | RVAGNTAYYQLRDR | VIDGTP | -42.986 |
| >gi 27463365 gb AAO15765. | 725  | GQDTNDICVQGLCR | QAGCDH | -31.372 |
| >gi 27463365 gb AAO15765. | 738  | RQAGCDHVLNSKAR | RDKCGV | -26.617 |
| >gi 27463365 gb AAO15765. | 739  | QAGCDHVLNSKARR | DKCGVC | 5.07    |
| >gi 27463365 gb AAO15765. | 771  | TFNTVHYGYNTVVR | IPAGAT | -37.237 |
| >gi 27463365 gb AAO15765. | 782  | VVRIPAGATNIDVR | QHSFSG | -34.136 |
| >gi 27463365 gb AAO15765. | 818  | FLLNGNFVVTMAKR | EIRIGN | -19.162 |
| >gi 27463365 gb AAO15765. | 821  | NGNFVVTMAKREIR | IGNAVV | -21.192 |
| >gi 27463365 gb AAO15765. | 838  | AVVEYSGSETAVER | INSTDR | -46.836 |
| >gi 27463365 gb AAO15765. | 844  | GSETAVERINSTDR | IEQELL | -44.887 |
| >gi 27463365 gb AAO15765. | 865  | QVLSVGKLYNPDVR | YSFNIP | -36.548 |
| >gi 27463365 gb AAO15765. | 898  | GPWQACSKPCQGER | KRKLVC | -38.153 |
| >gi 27463365 gb AAO15765. | 900  | WQACSKPCQGERKR | KLVCTR | -23.604 |
| >gi 27463365 gb AAO15765. | 906  | PCQGERKRKLVCTR | ESDQLT | -18.472 |
| >gi 27463365 gb AAO15765. | 917  | CTRESQTLVSDQR  | CDRLPQ | -32.998 |
| >gi 27463365 gb AAO15765. | 920  | ESDQLTVSDQRCDR | LPQPGH | -37.924 |
| >gi 27463365 gb AAO15765. | 938  | GHITEPCGTDCDLR | WHVASR | -47.91  |
| >gi 27463365 gb AAO15765. | 944  | CGTDCDLRWHVASR | SECSAQ | -27.819 |
| >gi 27463365 gb AAO15765. | 956  | SRSECSAQCGLYR  | TLDIYC | -40.813 |
| >gi 27463365 gb AAO15765. | 967  | GYRTLDIYCAKYSR | LDGKTE | -33.121 |
| >gi 27463365 gb AAO15765. | 989  | DDGFCSSHPKPSNR | EKCSGE | -18.768 |
| >gi 27463365 gb AAO15765. | 1002 | REKCSGECNTGGWR | YSAWTE | -34.183 |
| >gi 27463365 gb AAO15765. | 1019 | WTECSKSCDGGTQR | RRAICV | -35.109 |
| >gi 27463365 gb AAO15765. | 1020 | TECSKSCDGGTQRR | RAICVN | -15.225 |
| >gi 27463365 gb AAO15765. | 1021 | ECSKSCDGGTQRRR | AICVNT | -9.489  |
| >gi 27463365 gb AAO15765. | 1028 | GGTQRRRAICVNTR | NDVLDD | -36.568 |
| >gi 27463365 gb AAO15765. | 1047 | DSKCTHQEKVTIQR | CSEFPC | -19.357 |
| >gi 27463365 gb AAO15765. | 1075 | SECLVTCGKGHKHR | QVWCQF | -3.657  |
| >gi 27463365 gb AAO15765. | 1085 | HKHRQVWCQFGEDR | LNDRMC | -46.331 |
| >gi 27463365 gb AAO15765. | 1089 | QVWCQFGEDRLNDR | MCDPET | -37.207 |
| >gi 27463365 gb AAO15765. | 1130 | VQCSVTCGQGYQLR | AVKCII | -23.782 |
| >gi 27463365 gb AAO15765. | 1153 | MSVVDDNDCNAATR | PTDTQD | -35.862 |
| >gi 27463365 gb AAO15765. | 1175 | LPSCHPPAAPETR  | RSTYSA | -27.132 |
| >gi 27463365 gb AAO15765. | 1176 | PSCHPPAAPETR   | STYSAP | -13.605 |
| >gi 27463365 gb AAO15765. | 1183 | AAPETRRSTYSAPR | TQWRFG | -36.162 |
| >gi 27463365 gb AAO15765. | 1187 | TRRSTYSAPRTQWR | FGSWTP | -21.802 |
| >gi 27463365 gb AAO15765. | 1203 | SWTPCSATCGKGTR | MRYVSC | -34.058 |
| >gi 27463365 gb AAO15765. | 1205 | TPCSATCGKGTRMR | YVSCRD | -23.445 |
| >gi 27463365 gb AAO15765. | 1210 | TCGKGTRMRYVSCR | DENGSV | -28.207 |
| >gi 27463365 gb AAO15765. | 1227 | GVADESACATLPR  | PVAKEE | -32.14  |
| >gi 27463365 gb AAO15765. | 1258 | LDWSSCSVTCGQGR | ATRQVM | -30.749 |
| >gi 27463365 gb AAO15765. | 1261 | SSCSVTCGQGRATR | QVMCVN | -2.465  |
| >gi 27463365 gb AAO15765. | 1275 | QVMCVNYSDHVIDR | SECDQD | -36.376 |

|                           |      |                 |         |         |
|---------------------------|------|-----------------|---------|---------|
| >gi 27463365 gb AAO15765. | 1298 | ETDQDCSMSPCPQR  | TPDSGL  | -31.895 |
| >gi 27463365 gb AAO15765. | 1315 | SGLAQHPFQMEDYR  | PRSASP  | -43.576 |
| >gi 27463365 gb AAO15765. | 1317 | LAQHPFQMEDYRPR  | SASPSR  | -32.935 |
| >gi 27463365 gb AAO15765. | 1323 | QMEDYRPRSASPSR  | THVLGG  | -34.747 |
| >gi 27463365 gb AAO15765. | 1333 | SPSRTHVLGGNQWR  | TGPWGA  | -36.911 |
| >gi 27463365 gb AAO15765. | 1350 | WGACSSCAGGSQR   | RVVVCQ  | -24.589 |
| >gi 27463365 gb AAO15765. | 1351 | GACSSCAGGSQRR   | VVVCQD  | -20.278 |
| >gi 27463365 gb AAO15765. | 1369 | QDENGYTANDCVER  | IKPDEQ  | -47.951 |
| >gi 27463365 gb AAO15765. | 1376 | ANDCVERIKPDEQR  | ACESGP  | -26.122 |
| >gi 27463365 gb AAO15765. | 1403 | NWGECKLCCGGGIR  | TRLVVC  | -33.751 |
| >gi 27463365 gb AAO15765. | 1405 | GECTKLCGGGIRTR  | LVVCQR  | -22.993 |
| >gi 27463365 gb AAO15765. | 1411 | CGGGIRTRLVVCQR  | SNGERF  | -23.115 |
| >gi 27463365 gb AAO15765. | 1416 | RTRLVVCQRSNGER  | FPDLSC  | -26.241 |
| >gi 27463365 gb AAO15765. | 1431 | PDLSCIELDKPPDR  | EQCNTH  | -35.064 |
| >gi 27463365 gb AAO15765. | 1459 | STGPWSSCSVSCGR  | GHKQRN  | -36.651 |
| >gi 27463365 gb AAO15765. | 1464 | SSCSVSCGRGHKQR  | NVYCMA  | -2.538  |
| >gi 27463365 gb AAO15765. | 1491 | SDYCKHLAKPHGHR  | KCRGGR  | -25.882 |
| >gi 27463365 gb AAO15765. | 1494 | CKHLAKPHGHRKCR  | GGRCPK  | -12.564 |
| >gi 27463365 gb AAO15765. | 1497 | LAKPHGHRKCRGGR  | CPKWKA  | -15.963 |
| >gi 27463365 gb AAO15765. | 1515 | KAGAWSQCSVSCGR  | GVQQRH  | -29.388 |
| >gi 27463365 gb AAO15765. | 1520 | SQCSVSCGRGVQQR  | HVGCQI  | -11.79  |
| >gi 27463365 gb AAO15765. | 1533 | RHVGCQIGTHKIAR  | ETECNP  | 3.758   |
| >gi 27463365 gb AAO15765. | 1542 | HKIARETECNPYTR  | PESERD  | -40.595 |
| >gi 27463365 gb AAO15765. | 1547 | ETECNPYTRPESER  | DCQGPR  | -29.381 |
| >gi 27463365 gb AAO15765. | 1553 | YTRPESERDCQGPR  | CPLYTW  | -37.076 |
| >gi 27463365 gb AAO15765. | 1560 | RDCQGPRCPLYTWR  | AEEWQE  | -31.535 |
| >gi 27463365 gb AAO15765. | 1576 | EWQECTKTCGEGSR  | YRKVVC  | -39.608 |
| >gi 27463365 gb AAO15765. | 1578 | QECTKTCGEGSRYR  | KVVCVD  | -39.404 |
| >gi 27463365 gb AAO15765. | 1594 | VCVDDNKNEVHGAR  | CDVSKR  | -17.581 |
| >gi 27463365 gb AAO15765. | 1600 | KNEVHGARCDVSKR  | PVDRES  | -22.648 |
| >gi 27463365 gb AAO15765. | 1604 | HGARCDVSKRPVDR  | ESCSLQ  | -18.643 |
| >gi 27463365 gb AAO15765. | 1635 | SECSVTCGKGYKQR  | LVSCSE  | -23.283 |
| >gi 27463365 gb AAO15765. | 1673 | PGTQPPSVHPCYLR  | ECPVSA  | -29.125 |
| >gi 27463365 gb AAO15765. | 1682 | PCYLRECPVSATWR  | VGNWGS  | -35.124 |
| >gi 27463365 gb AAO15765. | 1700 | GSCSVSCGVGMQR   | SVQCLT  | -17.162 |
| >gi 27463365 gb AAO15765. | 1724 | PSHLCHTDLKPEER  | KTCRNV  | -33.647 |
| >gi 27463365 gb AAO15765. | 1728 | CHTDLKPEERKTCR  | NVYNCE  | -18.291 |
| >gi 27463365 gb AAO15765. | 1744 | YNCELPQNCKEVKR  | LKGASE  | -28.44  |
| >gi 27463365 gb AAO15765. | 1759 | KGASEDGEYFLMIR  | GKLLKI  | -35.724 |
| >gi 27463365 gb AAO15765. | 1796 | HGSENSEFSEVYGHR | LHNPTTE | -37.465 |
| >gi 27463365 gb AAO15765. | 1809 | RLHNPTTECPYNGSR | RDDCQC  | -34.033 |
| >gi 27463365 gb AAO15765. | 1810 | LHNPTTECPYNGSRR | DDCQCR  | -17.793 |
| >gi 27463365 gb AAO15765. | 1816 | CPYNGSRRDDCQCR  | KDYTAA  | -54.421 |

|                           |      |                |        |         |
|---------------------------|------|----------------|--------|---------|
| >gi 27463365 gb AAO15765. | 1831 | DYTAAGFSSFQKIR | IDLTSM | -35.877 |
| >gi 27463365 gb AAO15765. | 1848 | TSMQIITDLQFAR  | TSEGHP | -34.213 |
| >gi 27463365 gb AAO15765. | 1873 | AGDCYSAAKCPQGR | FSINLY | -26.659 |
| >gi 27463365 gb AAO15765. | 1890 | NLYGTGLSLTESAR | WISQGN | -34.058 |
| >gi 27463365 gb AAO15765. | 1910 | YAVSDIKKSPDGTR | VVGKCG | -35.285 |
| >gi 27463365 gb AAO15765. | 1933 | GKCTPSSGTGLEVR | VL---- | -31.162 |
| >gi 6561820 gb AAF17082.1 | 27   | SGMLPAQGTHLGIR | LPLRSG | -35.424 |
| >gi 6561820 gb AAF17082.1 | 31   | PAQGTHLGIRLPLR | SGLAGP | -14.55  |
| >gi 6561820 gb AAF17082.1 | 42   | PLRSGLAGPPLGLR | LPRETD | -32.957 |
| >gi 6561820 gb AAF17082.1 | 56   | LPRETDEESEEPGR | RGSFVE | -39.084 |
| >gi 6561820 gb AAF17082.1 | 57   | PRETDEESEEPGRR | GSFVEM | -25.125 |
| >gi 6561820 gb AAF17082.1 | 68   | GRRGSFVEMVDNLR | GKSGQG | -34.149 |
| >gi 6561820 gb AAF17082.1 | 111  | NFAVGAAPHPFLHR | YYQRQL | -31.645 |
| >gi 6561820 gb AAF17082.1 | 115  | GAAPHPFLHRYYQR | QLSSTY | -19.203 |
| >gi 6561820 gb AAF17082.1 | 122  | LHRYYQRQLSSTYR | DLRKGV | -24.997 |
| >gi 6561820 gb AAF17082.1 | 125  | YYQRQLSSTYRDLR | KGVYVP | -30.339 |
| >gi 6561820 gb AAF17082.1 | 157  | DLVSIPHGPNVTVR | ANIAAI | -20.927 |
| >gi 6561820 gb AAF17082.1 | 189  | WEGILGLAYAEIAR | PDDSLE | -34.905 |
| >gi 6561820 gb AAF17082.1 | 255  | HSLYTGSLWYTPIR | REWYVE | -36.823 |
| >gi 6561820 gb AAF17082.1 | 256  | SLYTGSLWYTPIRR | EWYVEV | -22.213 |
| >gi 6561820 gb AAF17082.1 | 266  | PIRREWYVEVIIVR | VEINGQ | -39.717 |
| >gi 6561820 gb AAF17082.1 | 296  | YDKSIVDSGTTNLR | LPKKVF | -33.888 |
| >gi 6561820 gb AAF17082.1 | 358  | SLYLMGEVTNQSFR | ITILPQ | -34.388 |
| >gi 6561820 gb AAF17082.1 | 368  | QSFRITILPQQYLR | PVEDVA | -26.731 |
| >gi 6561820 gb AAF17082.1 | 408  | GAVIMEGFYVVFDR | ARKRIG | -34.169 |
| >gi 6561820 gb AAF17082.1 | 410  | VIMEGFYVVFDRAR | KRIGFA | -37.88  |
| >gi 6561820 gb AAF17082.1 | 412  | MEGFYVVFDRARKR | IGFAVS | -23.56  |
| >gi 6561820 gb AAF17082.1 | 427  | GFAVSACHVHDEFR | TAAVEG | -40.666 |
| >gi 6561820 gb AAF17082.1 | 481  | LFMLPLCLMVCQWR | CLRCLR | -33.979 |
| >gi 6561820 gb AAF17082.1 | 484  | LPLCLMVCQWRCLR | CLRHQH | -24.078 |
| >gi 6561820 gb AAF17082.1 | 487  | CLMVCQWRCLRCLR | HQHDDF | -25.146 |
| >gi 13124688 sp P13497.2  | 21   | PLLLGLLLLPRPGR | PLDLAD | -4.441  |
| >gi 13124688 sp P13497.2  | 64   | AFLGDIALDEEDLR | AFQVQQ | -51.838 |
| >gi 13124688 sp P13497.2  | 75   | DLRAFQVQQAVDLR | RHTARK | -34.049 |
| >gi 13124688 sp P13497.2  | 76   | LRAFQVQQAVDLRR | HTARKS | -17.439 |
| >gi 13124688 sp P13497.2  | 80   | QVQQAVDLRRHTAR | KSSIKA | -11.817 |
| >gi 13124688 sp P13497.2  | 106  | STPSCQSTNGQPQR | GACGRW | -21.76  |
| >gi 13124688 sp P13497.2  | 111  | QSTNGQPQRGACGR | WRGRSR | -28.432 |
| >gi 13124688 sp P13497.2  | 113  | TNGQPQRGACGRWR | GRSRSR | -36.379 |
| >gi 13124688 sp P13497.2  | 115  | GQPQRGACGRWRGR | SRSRRA | -16.749 |
| >gi 13124688 sp P13497.2  | 117  | PQRGACGRWRGRSR | SRRAAT | -22.645 |
| >gi 13124688 sp P13497.2  | 119  | RGACGRWRGRSRSR | RAATSR | -16.31  |
| >gi 13124688 sp P13497.2  | 125  | WRGRSRSRRAATSR | PERVWP | -25.412 |



|                          |     |                 |         |         |
|--------------------------|-----|-----------------|---------|---------|
| >gi 13124688 sp P13497.2 | 128 | RSRSRRAATSRPER  | VWPDGV  | -25.78  |
| >gi 13124688 sp P13497.2 | 148 | IPFVIGGNFTGSQR  | AVFRQA  | -26.26  |
| >gi 13124688 sp P13497.2 | 152 | IGGNFTGSQRAVFR  | QAMRHW  | -23.668 |
| >gi 13124688 sp P13497.2 | 156 | FTGSQRAVFRQAMR  | HWEKHT  | -27.027 |
| >gi 13124688 sp P13497.2 | 169 | RHWEKHTCVTFLE   | TDEDSY  | -40.548 |
| >gi 13124688 sp P13497.2 | 181 | ERTDEDSYIVFTYR  | PCGCCS  | -39.936 |
| >gi 13124688 sp P13497.2 | 191 | FTYRPCGCCSYVGR  | RGGGPQ  | -36.237 |
| >gi 13124688 sp P13497.2 | 192 | TYRPCGCCSYVGRR  | GGGPQA  | -18.347 |
| >gi 13124688 sp P13497.2 | 227 | ELGHVVGFWHEHTR  | PDRDRH  | -39.024 |
| >gi 13124688 sp P13497.2 | 230 | HVVGFWHEHTRPDR  | DRHVISI | -20.119 |
| >gi 13124688 sp P13497.2 | 232 | VGFWHEHTRPDRDR  | HVSIVR  | -27.606 |
| >gi 13124688 sp P13497.2 | 238 | HTRPDRDRHVSIVR  | ENIQPG  | -25.384 |
| >gi 13124688 sp P13497.2 | 274 | GETYDFDSIMHYAR  | NTFSRG  | -19.137 |
| >gi 13124688 sp P13497.2 | 279 | FDSIMHYARNTFSR  | GIFLDT  | -21.503 |
| >gi 13124688 sp P13497.2 | 302 | KYEYVGVKPPIGQR  | TRLSKG  | -28.799 |
| >gi 13124688 sp P13497.2 | 304 | EVNGVKPPIGQRTR  | LSKGDI  | -31.411 |
| >gi 13124688 sp P13497.2 | 314 | QRTRLSKGDIAQAR  | KLYKCP  | -34.43  |
| >gi 13124688 sp P13497.2 | 351 | YPNGYSAHMHCVWR  | ISVTPG  | -37.952 |
| >gi 13124688 sp P13497.2 | 371 | EKIILNFTSLDLYR  | SRLCWY  | -35.738 |
| >gi 13124688 sp P13497.2 | 373 | IILNFTSLDLYRSR  | LCWYDY  | -41.049 |
| >gi 13124688 sp P13497.2 | 383 | YRSRLCWYDYVEVR  | DGFWRK  | -36.002 |
| >gi 13124688 sp P13497.2 | 388 | CWYDYVEVRDGFWR  | KAPLRG  | -35.239 |
| >gi 13124688 sp P13497.2 | 393 | VEVRDGFWRKAPLR  | GRFCGS  | -19.49  |
| >gi 13124688 sp P13497.2 | 395 | VRDGFWRKAPLRGR  | FCGSKL  | -25.229 |
| >gi 13124688 sp P13497.2 | 411 | GSKLPEPIVSTDSR  | LWVEFR  | -39.538 |
| >gi 13124688 sp P13497.2 | 417 | PIVSTDSRLWVEFR  | SSSNWV  | -27.951 |
| >gi 13124688 sp P13497.2 | 456 | YGHIQSPNYPDDYR  | PSKVICI | -44.409 |
| >gi 13124688 sp P13497.2 | 464 | YPDDYRPSKVICIWR | IQVSEG  | -33.436 |
| >gi 13124688 sp P13497.2 | 484 | FHVGLTFQSFEIER  | HDSCAY  | -44.206 |
| >gi 13124688 sp P13497.2 | 496 | ERHDSCAYDYLEVR  | DGHSES  | -41.577 |
| >gi 13124688 sp P13497.2 | 508 | VRDGHSESSTLIGR  | YCGYEK  | -29.396 |
| >gi 13124688 sp P13497.2 | 524 | GYEKPDDIKSTSSR  | LWLKFB  | -29.497 |
| >gi 13124688 sp P13497.2 | 553 | FAVNFKEVDECSR   | PNRGGC  | -49.618 |
| >gi 13124688 sp P13497.2 | 556 | NFFKEVDECSRPNR  | GGCEQR  | -18.22  |
| >gi 13124688 sp P13497.2 | 562 | DECSRPNRGGCEQR  | CLNTLG  | -25.681 |
| >gi 13124688 sp P13497.2 | 585 | CSCDPGYELAPDKR  | RCEAAC  | -26.267 |
| >gi 13124688 sp P13497.2 | 586 | SCDPGYELAPDKRR  | CEAACG  | -23.974 |
| >gi 13124688 sp P13497.2 | 628 | KNCIWQLVAPTQYR  | ISLQFD  | -35.835 |
| >gi 13124688 sp P13497.2 | 652 | EGNDVCKYDFVEVR  | SGLTAD  | -29.822 |
| >gi 13124688 sp P13497.2 | 682 | EKPEVITSQYNNMR  | VEFKSD  | -40.884 |
| >gi 13124688 sp P13497.2 | 730 | DCVNTFGSYECQCR  | SGFVLH  | -39.344 |
| >gi 13124688 sp P13497.2 | 784 | KECTWAISSTPGHR  | VKLTFM  | -32.466 |
| >gi 13124688 sp P13497.2 | 811 | PECAYDHLEVFDGR  | DAKAPV  | -37.211 |

|                           |     |                |        |         |
|---------------------------|-----|----------------|--------|---------|
| >gi 13124688 sp P13497.2  | 820 | VFDGRDAKAPVLGR | FCGSKK | -20.365 |
| >gi 13124688 sp P13497.2  | 836 | GSKKPEPVLATGSR | MFLRFY | -33.036 |
| >gi 13124688 sp P13497.2  | 840 | PEPVLATGSRMFLR | FYSDNS | -24.67  |
| >gi 13124688 sp P13497.2  | 849 | RMFLRFYSDNSVQR | KGFQAS | -40.436 |
| >gi 13124688 sp P13497.2  | 865 | FQASHATECGGQVR | ADVTKK | -32.67  |
| >gi 13124688 sp P13497.2  | 934 | YMELFDGYDSTAPR | LGRYCG | -39.143 |
| >gi 13124688 sp P13497.2  | 937 | LFDGYDSTAPRLGR | YCGSGP | -4.699  |
| >gi 13124688 sp P13497.2  | 972 | HSDDTITKKGFHLR | YTSTKF | -20.848 |
| >gi 13124688 sp P13497.2  | 985 | RYTSTKFQDTLHSR | K----  | -38.016 |
| >gi 16554579 ref NP_00008 | 35  | PLLLLLLWAPPPSR | AAQPAD | -23.618 |
| >gi 16554579 ref NP_00008 | 65  | PDGITKTTGFCATR | RSSKGP | -29.665 |
| >gi 16554579 ref NP_00008 | 66  | DGITKTTGFCATRR | SSKGPD | -20.314 |
| >gi 16554579 ref NP_00008 | 76  | ATRRSSKGPDVAYR | VTKDAQ | -36.403 |
| >gi 16554579 ref NP_00008 | 134 | NEQGIIQIGLELGR | SPVFLY | -27.727 |
| >gi 16554579 ref NP_00008 | 156 | HTGKPGPEDYPLFR | GINLSD | -41.106 |
| >gi 16554579 ref NP_00008 | 167 | LFRGINLSDGKWHR | IALSVH | -29.539 |
| >gi 16554579 ref NP_00008 | 193 | ILDCKKKTTKFLDR | SDHPMI | -26.577 |
| >gi 16554579 ref NP_00008 | 210 | PMIDINGIIVFGTR | ILDEEV | -37.403 |
| >gi 16554579 ref NP_00008 | 231 | EGDIQQLFVSDHR  | AAYDYC | -31.763 |
| >gi 16554579 ref NP_00008 | 410 | ADDLEGEFTEETIR | NLDENY | -36.807 |
| >gi 16554579 ref NP_00008 | 449 | ANQDTIYEGIGGPR | GEKGQK | -29.559 |
| >gi 16554579 ref NP_00008 | 498 | TMGPTGQVGDPPER | GPPGRP | -41.869 |
| >gi 16554579 ref NP_00008 | 503 | GQVGDPPERGPPGR | PGLPGA | -25.266 |
| >gi 16554579 ref NP_00008 | 525 | LPGPPGTMLMLPFR | FGGGGD | -34.266 |
| >gi 16554579 ref NP_00008 | 554 | AQESQAQAILQQAR | LALRGP | -32.154 |
| >gi 16554579 ref NP_00008 | 558 | QAQAILQQARLALR | GPAGPM | -8.73   |
| >gi 16554579 ref NP_00008 | 569 | ALRGPAGPMGLTGR | PGVGP  | -32.631 |
| >gi 16554579 ref NP_00008 | 594 | LKGEPGDVGPQGPR | GVQGPP | -19.465 |
| >gi 16554579 ref NP_00008 | 608 | GVQPPGPAGKPGR  | RGRAGS | -10.877 |
| >gi 16554579 ref NP_00008 | 609 | VQPPGPAGKPGR   | GRAGSD | -16.139 |
| >gi 16554579 ref NP_00008 | 611 | GPPGPAGKPGRGR  | AGSDGA | 1.167   |
| >gi 16554579 ref NP_00008 | 618 | KPGRRGRAGSDGAR | GMPGQT | -33.975 |
| >gi 16554579 ref NP_00008 | 630 | ARGMPGQTGPKGDR | GFDGLA | -27.246 |
| >gi 16554579 ref NP_00008 | 645 | FDGLAGLPGEKTHR | GDPGPS | -12.409 |
| >gi 16554579 ref NP_00008 | 663 | PSGPPGPPGDDGER | GDDGEV | -50.907 |
| >gi 16554579 ref NP_00008 | 672 | DDGERGDDGEVGPR | GLPGEP | -21.456 |
| >gi 16554579 ref NP_00008 | 681 | EVGPRGLPGEPPGR | GLLGP  | -28.107 |
| >gi 16554579 ref NP_00008 | 792 | PPGPQGPYGPGR   | GVKGAD | -28.686 |
| >gi 16554579 ref NP_00008 | 801 | YPGPRGVKGADGIR | GLKGTK | -32.326 |
| >gi 16554579 ref NP_00008 | 828 | FPGFKGDMGIKGR  | GEIGPP | -30.659 |
| >gi 16554579 ref NP_00008 | 837 | IKGDRGEIGPPGR  | GEDGPE | -28.727 |
| >gi 16554579 ref NP_00008 | 848 | GPRGEDGPEPKGR  | GGPNGD | -30.706 |
| >gi 16554579 ref NP_00008 | 878 | GKLGVPGLPGYPGR | QGPKGS | -28.466 |

|                           |      |                |        |         |
|---------------------------|------|----------------|--------|---------|
| >gi 16554579 ref NP_00008 | 900  | FPGFPGANGEKGGR | GTPGKP | -11.156 |
| >gi 16554579 ref NP_00008 | 909  | EKGGRGTPGKPGPR | GQRGPT | -19.248 |
| >gi 16554579 ref NP_00008 | 912  | GRGTPGKPGPRGQR | GPTGPR | 5.296   |
| >gi 16554579 ref NP_00008 | 918  | KPGPRGQRGPTGPR | GERGPR | -29.767 |
| >gi 16554579 ref NP_00008 | 921  | PRGQRGPTGPRGER | GPRGIT | -17.126 |
| >gi 16554579 ref NP_00008 | 924  | QRGPTGPRGERGPR | GITGKP | -1.601  |
| >gi 16554579 ref NP_00008 | 948  | NSGGDGPAGPPGER | GPNGPQ | -33.2   |
| >gi 16554579 ref NP_00008 | 981  | PPGKDGLPGHPGQR | GETGFQ | -29.496 |
| >gi 16554579 ref NP_00008 | 1014 | PQGPTGETGPMGER | GHPGPP | -40.794 |
| >gi 16554579 ref NP_00008 | 1056 | PAGLPGKDGPPGLR | GFPGDR | -27.278 |
| >gi 16554579 ref NP_00008 | 1062 | KDGPPGLRGFPGDR | GLPGPV | -35.424 |
| >gi 16554579 ref NP_00008 | 1092 | PPGPPGAGSPGER  | GPAGAA | -33.633 |
| >gi 16554579 ref NP_00008 | 1106 | GPAGAAGPIGIPGR | PGPQGP | -31.656 |
| >gi 16554579 ref NP_00008 | 1133 | GAPGEKGPQGPAGR | DGLQGP | -28.097 |
| >gi 16554579 ref NP_00008 | 1203 | QPGPSGADGEPGPR | GQQGLF | -30.419 |
| >gi 16554579 ref NP_00008 | 1218 | QQGLFGQKGDEGPR | GFPGPP | -38.996 |
| >gi 16554579 ref NP_00008 | 1257 | DVGQMGPPGPPGPR | GPSGAP | -24.065 |
| >gi 16554579 ref NP_00008 | 1298 | GEPGEAGEPGPSGR | SGPPGP | -22.1   |
| >gi 16554579 ref NP_00008 | 1308 | PSGRSGPPGPKGER | GEKGES | -29.544 |
| >gi 16554579 ref NP_00008 | 1392 | PTGEPGSPGPPGKR | GPPGPA | -17.264 |
| >gi 16554579 ref NP_00008 | 1403 | GKRGPAGPEGR    | QGEKGA | -28.352 |
| >gi 16554579 ref NP_00008 | 1440 | PQGAPGKPGPDGLR | GIPGPV | -30.647 |
| >gi 16554579 ref NP_00008 | 1503 | LIGPPGEQGEKGDR | GLPGPQ | -28.524 |
| >gi 16554579 ref NP_00008 | 1582 | PGEVIQPLPIQASR | TRRNID | -30.706 |
| >gi 16554579 ref NP_00008 | 1584 | EVIQPLPIQASRTR | RNIDAS | -27.114 |
| >gi 16554579 ref NP_00008 | 1627 | SLNSLKLEIEQMKR | PLGTQQ | -25.512 |
| >gi 16554579 ref NP_00008 | 1637 | QMKRPLGTQQNPAR | TCKDLQ | -35.835 |
| >gi 16554579 ref NP_00008 | 1664 | DGEYVDPNQGCSR  | DSFKVY | -33.378 |
| >gi 16554579 ref NP_00008 | 1691 | STCVFPDKKSEGAR | ITSWPK | -27.935 |
| >gi 16554579 ref NP_00008 | 1709 | PKENPGSWFSEFKR | GKLLSY | -23.763 |
| >gi 16554579 ref NP_00008 | 1732 | EGNPVGVVQMTFLR | LLSASA | -36.531 |
| >gi 16554579 ref NP_00008 | 1765 | WQDAATGSYDKALR | FLGSND | -13.458 |
| >gi 16554579 ref NP_00008 | 1783 | NDEEMSYDNNPYIR | ALVDGC | -32.107 |
| >gi 81871160 sp Q810Y4.1  | 23   | GGGTQDPGAGCGAR | ALGALC | -23.734 |
| >gi 81871160 sp Q810Y4.1  | 53   | CLLLGAQAAALHGR | VAALEQ | -31.61  |
| >gi 81871160 sp Q810Y4.1  | 61   | AALHGRVAALEQER | ELLRRA | -35.864 |
| >gi 81871160 sp Q810Y4.1  | 65   | GRVAALEQERELLR | RAGPSG | -26.856 |
| >gi 81871160 sp Q810Y4.1  | 66   | RVAALEQERELLRR | AGPSGA | 1.492   |
| >gi 81871160 sp Q810Y4.1  | 83   | SGALAAWAETHLER | LLREKL | -42.26  |
| >gi 81871160 sp Q810Y4.1  | 86   | LAAWAETHLERLLR | EKLDGV | -4.856  |
| >gi 81871160 sp Q810Y4.1  | 96   | RLLREKLDGVAKLR | TVREAP | -26.604 |
| >gi 81871160 sp Q810Y4.1  | 114  | APSECICPPGPPGR | RGKPGR | -28.755 |
| >gi 81871160 sp Q810Y4.1  | 115  | PSECICPPGPPGRR | GKPGRR | -17.366 |

|                           |     |                |        |         |
|---------------------------|-----|----------------|--------|---------|
| >gi 81871160 sp Q810Y4.1  | 120 | CPPGPPGRRGKPGR | RGDPGP | -0.789  |
| >gi 81871160 sp Q810Y4.1  | 121 | PPGPPGRRGKPGRR | GDPGPP | -13.825 |
| >gi 81871160 sp Q810Y4.1  | 132 | GRRGDGPPGQSGR  | DGYPGP | -21.525 |
| >gi 81871160 sp Q810Y4.1  | 163 | PKGEKGAPGDFGPR | GAQGQD | -30.04  |
| >gi 81871160 sp Q810Y4.1  | 184 | AAGPPGPPGPPGAR | GPPGDT | -24.664 |
| >gi 81871160 sp Q810Y4.1  | 196 | ARGPPGDTGKDGP  | GAQGPE | -20.348 |
| >gi 81871160 sp Q810Y4.1  | 205 | KDGPRGAQGPEGPR | GESGQD | -32.843 |
| >gi 81871160 sp Q810Y4.1  | 286 | EPGHPGTDGAIGPR | GPPGLK | -17.75  |
| >gi 81871160 sp Q810Y4.1  | 306 | GEQGDTVVIDYDGR | ILDALK | -42.664 |
| >gi 81871160 sp Q810Y4.1  | 439 | LDGAKGEKGASGER | GPHGLP | -33.91  |
| >gi 81871160 sp Q810Y4.1  | 465 | GLIGLPGTKGEKGR | PGEPGL | -27.203 |
| >gi 81871160 sp Q810Y4.1  | 478 | RPGEPLDGFPGPR  | GEKGDR | -31.563 |
| >gi 81871160 sp Q810Y4.1  | 484 | LDGFPGPRGEKGDR | SERGEK | -32.405 |
| >gi 81871160 sp Q810Y4.1  | 487 | FPGPRGEKGRSER  | GEKGER | -26.378 |
| >gi 81871160 sp Q810Y4.1  | 493 | EKGDRSERGEKGER | GVPGRK | -26.066 |
| >gi 81871160 sp Q810Y4.1  | 498 | SERGEKGERGVPGR | KGVKGQ | -21.75  |
| >gi 38570075 ref NP_94201 | 29  | RSEDPTPAEQHCAR | TMPPCA | -42.187 |
| >gi 38570075 ref NP_94201 | 62  | CLYLGVKTNLQAR  | IAALES | -38.201 |
| >gi 38570075 ref NP_94201 | 95  | LDHLKTMVQEKVER | LLAQKS | -35.183 |
| >gi 38570075 ref NP_94201 | 109 | LLAQSIEHMAKIR  | IAREAP | -32.255 |
| >gi 38570075 ref NP_94201 | 128 | PSECNCPPGPPGKR | GKRGRR | -17.536 |
| >gi 38570075 ref NP_94201 | 131 | CNCPPGPPGKRGR  | GRRGES | 10.949  |
| >gi 38570075 ref NP_94201 | 133 | CPAGPPGKRGRGR  | RGESGP | 0.438   |
| >gi 38570075 ref NP_94201 | 134 | PAGPPGKRGRGRR  | GESGPP | 8.49    |
| >gi 38570075 ref NP_94201 | 164 | PKGDKGEQGDQGPR | MVFPKI | -29.36  |
| >gi 38570075 ref NP_94201 | 184 | NHGFLSADQQLIKR | RLIKGD | -20.771 |
| >gi 38570075 ref NP_94201 | 185 | HGFLSADQQLIKRR | LIKGDQ | -15.42  |
| >gi 38570075 ref NP_94201 | 206 | QAGPPGPPGPPGPR | GPPGDT | -24.11  |
| >gi 38570075 ref NP_94201 | 218 | PRGPPGDTGKDGP  | GMPGVP | -28.864 |
| >gi 38570075 ref NP_94201 | 321 | SAAGIKGEPGESGR | PGQKGE | -31.677 |
| >gi 38570075 ref NP_94201 | 364 | EPGLPGLPGTKGER | GEAGPP | -31.834 |
| >gi 38570075 ref NP_94201 | 372 | GTKGERGEAGPPGR | GERGEP | -30.335 |
| >gi 38570075 ref NP_94201 | 375 | GERGEAGPPGRGER | GEPGAP | -22.834 |
| >gi 38570075 ref NP_94201 | 393 | APGPKGKQGESGTR | GPKGSK | -31.041 |
| >gi 38570075 ref NP_94201 | 402 | ESGTRGPKGSKGDR | GEKGDS | -28.479 |
| >gi 38570075 ref NP_94201 | 414 | DRGEKGDGAQGPR  | GPPGQK | -19.904 |
| >gi 38570075 ref NP_94201 | 441 | IIDYNGNLHEALQR | ITTLTV | -33.987 |
| >gi 38570075 ref NP_94201 | 570 | PMGPHGPAGPKGER | GEKGAM | -30.469 |
| >gi 38570075 ref NP_94201 | 582 | ERGEKGAMGEPGPR | GPYGLP | -29.248 |
| >gi 38570075 ref NP_94201 | 603 | KDGEPGLDGFPGPR | GEKGD  | -31.563 |
| >gi 38570075 ref NP_94201 | 618 | EKGDLEKGEKGF   | GVKGEK | -13.453 |
| >gi 2498284 sp Q14118.1 D | 40  | AQSHWPSEPSEAVR | DWENQL | -30.848 |
| >gi 2498284 sp Q14118.1 D | 76  | TVVGIPDGTAVVGR | SFRVTI | -20.671 |

|                           |     |                |        |         |
|---------------------------|-----|----------------|--------|---------|
| >gi 2498284 sp Q14118.1 D | 79  | GIPDGTAVVGRSFR | VTIPTD | -21.552 |
| >gi 2498284 sp Q14118.1 D | 137 | TDKGVHYISVSATR | LGANGS | -34.994 |
| >gi 2498284 sp Q14118.1 D | 168 | EVYPEDHSDLQSVR | TASPD  | -32.41  |
| >gi 2498284 sp Q14118.1 D | 207 | ILDADLTkMTPKQR | IDLLHR | -34.507 |
| >gi 2498284 sp Q14118.1 D | 213 | TKMTPKQRIDLLHR | MRSFSE | -35.725 |
| >gi 2498284 sp Q14118.1 D | 215 | MTPKQRIDLLHRMR | SFSEVE | -12.409 |
| >gi 2498284 sp Q14118.1 D | 234 | ELHNMKLVVNNR   | LFDMSA | -30.419 |
| >gi 2498284 sp Q14118.1 D | 282 | NSVPDIHGVEAPAR | EGAMSA | -32.063 |
| >gi 2498284 sp Q14118.1 D | 309 | GWHIANKKPPLPKR | VRRQIH | -24.813 |
| >gi 2498284 sp Q14118.1 D | 311 | HIANKKPPLPKRVR | RQIHAT | -9.178  |
| >gi 2498284 sp Q14118.1 D | 337 | IGPPTAIQEPSR   | IVPTPT | -38.588 |
| >gi 2498284 sp Q14118.1 D | 359 | AIAPPTETMAPPVR | DPVPGK | -28.974 |
| >gi 2498284 sp Q14118.1 D | 371 | VRDPVPGKPTVTIR | TRGAI  | -31.394 |
| >gi 2498284 sp Q14118.1 D | 373 | DPVPGKPTVTIRTR | GAIQT  | -18.58  |
| >gi 2498284 sp Q14118.1 D | 389 | IIQTPTLGPQPTR  | VSEAGT | -27.57  |
| >gi 2498284 sp Q14118.1 D | 402 | RVSEAGTTVPGQIR | PTMTIP | -32.587 |
| >gi 2498284 sp Q14118.1 D | 428 | AVATPPTTTTKKPR | VSTPKP | -18.225 |
| >gi 2498284 sp Q14118.1 D | 447 | PATPSTDSTTTTR  | RPTKKP | -26.142 |
| >gi 2498284 sp Q14118.1 D | 448 | ATPSTDSTTTTRR  | PTKKPR | -16.838 |
| >gi 2498284 sp Q14118.1 D | 454 | STTTTRRPTKKPR  | TPRPVP | -2.758  |
| >gi 2498284 sp Q14118.1 D | 457 | TTTRRPTKKPRTPR | PVPRVT | 10.302  |
| >gi 2498284 sp Q14118.1 D | 461 | RPTKKPRTPRPVPR | VTTKVS | -19.594 |
| >gi 2498284 sp Q14118.1 D | 470 | RPVPRVTTKVSITR | LETASP | -29.404 |
| >gi 2498284 sp Q14118.1 D | 479 | VSITRLETASPPTR | IRTTTS | -33.139 |
| >gi 2498284 sp Q14118.1 D | 481 | ITRLETASPPTRIR | TTTSGV | -31.468 |
| >gi 2498284 sp Q14118.1 D | 489 | PPTRIRTTTSGVPR | GGEPNQ | -21.999 |
| >gi 2498284 sp Q14118.1 D | 496 | TTSGVPRGGEPNQR | PELKNH | -39.177 |
| >gi 2498284 sp Q14118.1 D | 505 | EPNQRPELKNHIDR | VDWVG  | -31.364 |
| >gi 2498284 sp Q14118.1 D | 541 | DTTDDKLLTLKLR  | EQQLVG | -24.396 |
| >gi 2498284 sp Q14118.1 D | 597 | GLSAVDAFEIHVHR | RPQGDR | -17.13  |
| >gi 2498284 sp Q14118.1 D | 598 | LSAVDAFEIHVHRR | PQGDRA | -4.469  |
| >gi 2498284 sp Q14118.1 D | 603 | AFEIHVHRRPQGDR | APARFK | -22.966 |
| >gi 2498284 sp Q14118.1 D | 607 | HVHRRPQGDRA    | FKAKFV | -22.272 |
| >gi 2498284 sp Q14118.1 D | 640 | IALVKKLAFAFGDR | NCSTIT | -43.066 |
| >gi 2498284 sp Q14118.1 D | 652 | DRNCSTITLQNTR  | GSIVVE | -27.207 |
| >gi 2498284 sp Q14118.1 D | 679 | LEPCPKEQIAGLSR | RIAEDD | -32.342 |
| >gi 2498284 sp Q14118.1 D | 680 | EPCPKEQIAGLSRR | IAEDDG | -17.812 |
| >gi 2498284 sp Q14118.1 D | 689 | GLSRRIAEDDGKPR | PAFSNA | -37.525 |
| >gi 2498284 sp Q14118.1 D | 714 | KATSITVTGSGSCR | HLQFIP | -28.973 |
| >gi 2498284 sp Q14118.1 D | 725 | SCRHLQFIPVPPR  | RVPSEA | -18.322 |
| >gi 2498284 sp Q14118.1 D | 726 | CRHLQFIPVPPRR  | VPSEAP | -23.331 |
| >gi 2498284 sp Q14118.1 D | 739 | RVPSEAPTEVPDR  | DPEKSS | -33.68  |
| >gi 2498284 sp Q14118.1 D | 776 | ILLIAGIIMICYR  | KKRKGK | -40.447 |

|                           |     |                 |        |         |
|---------------------------|-----|-----------------|--------|---------|
| >gi 2498284 sp Q14118.1 D | 779 | IAGIIMICYRKKR   | KGKLT  | -24.058 |
| >gi 2498284 sp Q14118.1 D | 854 | PLNQDTMGEYTPLR  | DEDPNA | -41.943 |
| >gi 2498284 sp Q14118.1 D | 879 | PPPFTVPMEGKGSR  | PKNMTP | -17.746 |
| >gi 2498284 sp Q14118.1 D | 887 | EGKGSRPKNMTPYR  | SPPPYV | -31.701 |
| >gi 134635 sp P08294 SODE | 36  | DSAEPNSDSAEWIR  | DMYAKV | -40.547 |
| >gi 134635 sp P08294 SODE | 52  | YAKVTEIWQEVMQR  | RDDDGT | -30.614 |
| >gi 134635 sp P08294 SODE | 53  | AKVTEIWQEVMQRR  | DDDGT  | -21.611 |
| >gi 134635 sp P08294 SODE | 77  | QVQPSATLDAAQPR  | VTGVVL | -35.065 |
| >gi 134635 sp P08294 SODE | 85  | DAAQPRVTGVVLF   | QLAPRA | -22.235 |
| >gi 134635 sp P08294 SODE | 90  | RVTGVVLFRLAPR   | AKLDAF | -11.525 |
| >gi 134635 sp P08294 SODE | 111 | ALEGFTEPNSSSR   | AIHVDH | -23.126 |
| >gi 134635 sp P08294 SODE | 152 | HPQHGFDFGNFAVR  | DGSLWR | -28.652 |
| >gi 134635 sp P08294 SODE | 158 | DFGNFAVRDGLWR   | YRAGLA | -41.613 |
| >gi 134635 sp P08294 SODE | 160 | GNFAVRDGLWR     | AGLAAS | -28.853 |
| >gi 134635 sp P08294 SODE | 176 | LAASLAGPHSIVGR  | AVVHA  | -5.343  |
| >gi 134635 sp P08294 SODE | 189 | RAVVHAGEDDLGR   | GGNQAS | -48.711 |
| >gi 134635 sp P08294 SODE | 203 | GGNQASVENGAGR   | RLACCV | -31.03  |
| >gi 134635 sp P08294 SODE | 204 | GNQASVENGAGR    | LACCV  | -22.944 |
| >gi 134635 sp P08294 SODE | 220 | CCVVGCGPGLWER   | QAREHS | -34.54  |
| >gi 134635 sp P08294 SODE | 223 | VGVCGPGLWERQAR  | EHSERK | -24.206 |
| >gi 134635 sp P08294 SODE | 228 | PGLWERQAREHSER  | KKRRRE | -29.667 |
| >gi 134635 sp P08294 SODE | 232 | ERQAREHSERKRR   | RESECK | 2.447   |
| >gi 134635 sp P08294 SODE | 233 | RQAREHSERKRRR   | ESECKA | 14.803  |
| >gi 544279 sp P35555.1 FB | 38  | ADANLEAGNVKETR  | ASRAKR | -17.164 |
| >gi 544279 sp P35555.1 FB | 41  | NLEAGNVKETRASR  | AKRRGG | -6.967  |
| >gi 544279 sp P35555.1 FB | 44  | AGNVKETRASRAKR  | RGGGGH | 9.818   |
| >gi 544279 sp P35555.1 FB | 45  | GNVKETRASRAKRR  | GGGGHD | -8.461  |
| >gi 544279 sp P35555.1 FB | 62  | GHDALKGPNVCGSR  | YNAYCC | -33.641 |
| >gi 544279 sp P35555.1 FB | 86  | TLPGGNQCIVPICR  | HSCGDG | -37.146 |
| >gi 544279 sp P35555.1 FB | 96  | PICRHSCGDGFCSR  | PNMCTC | -43.919 |
| >gi 544279 sp P35555.1 FB | 114 | TCPSGQIAPSCGSR  | SIQHCN | -23.531 |
| >gi 544279 sp P35555.1 FB | 122 | PSCGSRSIQHCNIR  | CMNGGS | -37.466 |
| >gi 544279 sp P35555.1 FB | 159 | GQPVCEGCLNGGR   | CVAPNR | -35.571 |
| >gi 544279 sp P35555.1 FB | 165 | SGCLNGGRCVAPNR  | CACTYG | -33.602 |
| >gi 544279 sp P35555.1 FB | 179 | CACTYGFTGPQCER  | DYRTGP | -41.961 |
| >gi 544279 sp P35555.1 FB | 182 | TYGFTGPQCERDYR  | TGPCFT | -40.005 |
| >gi 544279 sp P35555.1 FB | 215 | IVCTKQLCCATVGR  | AWGHPC | -35.41  |
| >gi 544279 sp P35555.1 FB | 232 | HPCEMCPAQPHPCR  | RGFIPN | -31.789 |
| >gi 544279 sp P35555.1 FB | 233 | PCEMCPAQPHPCR   | GFIPNI | -22.843 |
| >gi 544279 sp P35555.1 FB | 240 | QPHPCRRTGFIPNIR | TGACQD | -35.475 |
| >gi 544279 sp P35555.1 FB | 327 | KCPPGFYTS PDGTR | CIDVRP | -31.515 |
| >gi 544279 sp P35555.1 FB | 332 | FYTS PDGTRCIDVR | PGYCYT | -31.771 |
| >gi 544279 sp P35555.1 FB | 344 | VRPGYCYTALTNGR  | CSNQLP | -27.147 |

|                           |      |                 |         |         |
|---------------------------|------|-----------------|---------|---------|
| >gi 544279 sp P35555.1 FB | 364  | QSITKMQCCCDAGR  | CWSPGV  | -44.759 |
| >gi 544279 sp P35555.1 FB | 380  | SPGVTVAPEMCPIR  | ATEDFN  | -38.622 |
| >gi 544279 sp P35555.1 FB | 398  | FNKLCVPMVIPGR   | PEYPPP  | -33.435 |
| >gi 544279 sp P35555.1 FB | 429  | PPGFPPGPQIPVPR  | PPVEYL  | -27.992 |
| >gi 544279 sp P35555.1 FB | 439  | PVPRPPVEYLPSR   | EPPRVL  | -28.596 |
| >gi 544279 sp P35555.1 FB | 443  | PPVEYLPSREPPR   | VLPVNV  | -25.277 |
| >gi 544279 sp P35555.1 FB | 457  | VLPVNVTDYCQLVR  | YLCQNG  | -33.032 |
| >gi 544279 sp P35555.1 FB | 464  | DYCQLVRYLCQNGR  | CIPTPG  | -31.992 |
| >gi 544279 sp P35555.1 FB | 473  | CQNGRCIPTPGSYR  | CECNKG  | -34.751 |
| >gi 544279 sp P35555.1 FB | 485  | YRCECNKGFQLDLR  | GECIDV  | -40.589 |
| >gi 544279 sp P35555.1 FB | 516  | ECINNQGSYTCQCR  | AGYQST  | -34.097 |
| >gi 544279 sp P35555.1 FB | 525  | TCQCRAQYQSTLTR  | TECRDI  | -36.84  |
| >gi 544279 sp P35555.1 FB | 529  | RAGYQSTLTRTECR  | DIDDECL | -23.244 |
| >gi 544279 sp P35555.1 FB | 539  | TECRDIDDECLQNGR | ICNNGR  | -38.652 |
| >gi 544279 sp P35555.1 FB | 545  | DECLQNGRICNNGR  | CINTDG  | -38.163 |
| >gi 544279 sp P35555.1 FB | 565  | SFHCVNAGFHVTR   | DGKNCE  | -12.521 |
| >gi 544279 sp P35555.1 FB | 579  | DGKNCEDMDECSIR  | NMCLNG  | -48.026 |
| >gi 544279 sp P35555.1 FB | 609  | CICKPGFQLASDGR  | YCKDIN  | -36.254 |
| >gi 544279 sp P35555.1 FB | 627  | INECETPGICMNGR  | CVNTDG  | -36.837 |
| >gi 544279 sp P35555.1 FB | 636  | CMNGRCVNTDGSYR  | CECFPG  | -42.323 |
| >gi 544279 sp P35555.1 FB | 650  | CECFPGLAVGLDGR  | VCVDTH  | -38.822 |
| >gi 544279 sp P35555.1 FB | 658  | VGLDGRVCVDTHMR  | STCYGG  | -35.894 |
| >gi 544279 sp P35555.1 FB | 667  | DTHMRSTCYGGYKR  | GQCIKP  | -20.987 |
| >gi 544279 sp P35555.1 FB | 743  | DPDICPNGICENLR  | GTYKCI  | -42.059 |
| >gi 544279 sp P35555.1 FB | 782  | CVLNSLLCDNGQCR  | NTPGSF  | -39.296 |
| >gi 544279 sp P35555.1 FB | 861  | TIKGTCWQTVIDGR  | CEININ  | -33.278 |
| >gi 544279 sp P35555.1 FB | 902  | LCQVDPICGKGYSR  | IKGTQC  | -30.059 |
| >gi 544279 sp P35555.1 FB | 930  | FPGVCKNGLCVNTR  | GSFKCQ  | -25.993 |
| >gi 544279 sp P35555.1 FB | 948  | CQCPSGMTLDATGR  | ICLDIR  | -41.743 |
| >gi 544279 sp P35555.1 FB | 954  | MTLDATGRICLDIR  | LET CFL | -38.95  |
| >gi 544279 sp P35555.1 FB | 961  | RICLDIRLET CFL  | YEDEEC  | -42.514 |
| >gi 544279 sp P35555.1 FB | 974  | RYEDEECTLPIAGR  | HRMDAC  | -25.021 |
| >gi 544279 sp P35555.1 FB | 976  | EDEECTLPIAGRHR  | MDACCC  | -31.197 |
| >gi 544279 sp P35555.1 FB | 999  | AAWGTEECECPMR   | NTPEYE  | -44.318 |
| >gi 544279 sp P35555.1 FB | 1010 | PMRNTPEYEELCPR  | GPGFAT  | -41.295 |
| >gi 544279 sp P35555.1 FB | 1045 | CKMIPSLCTHGKCR  | NTIGSF  | -28.469 |
| >gi 544279 sp P35555.1 FB | 1054 | HGKCRNTIGSFKCR  | CDSGFA  | -30.141 |
| >gi 544279 sp P35555.1 FB | 1066 | CRCDSGFALDSEER  | NCTDID  | -47.527 |
| >gi 544279 sp P35555.1 FB | 1075 | DSEERNCTDIDECR  | ISPDLC  | -50.348 |
| >gi 544279 sp P35555.1 FB | 1083 | DIDECRISPDLCGR  | GQCVNT  | -38.63  |
| >gi 544279 sp P35555.1 FB | 1119 | MMMKNCMDIDECQR  | DPLLCR  | -48.045 |
| >gi 544279 sp P35555.1 FB | 1125 | MDIDECQRDPLLCR  | GGVCHN  | -37.864 |
| >gi 544279 sp P35555.1 FB | 1137 | CRGGVCHNTEGSYR  | CECPPG  | -40.332 |

|                           |      |                 |         |         |
|---------------------------|------|-----------------|---------|---------|
| >gi 544279 sp P35555.1 FB | 1170 | NECELSAHLCPNGR  | CVNLIG  | -32.849 |
| >gi 544279 sp P35555.1 FB | 1192 | QCACNPGYHSTPDR  | LFCVDI  | -41.878 |
| >gi 544279 sp P35555.1 FB | 1234 | CSCQPGFALMPDQR  | SCTDID  | -32.836 |
| >gi 544279 sp P35555.1 FB | 1262 | CDGGQCTNIPGEYR  | CLCYDG  | -36.324 |
| >gi 544279 sp P35555.1 FB | 1388 | SQHADCKNTMGSYR  | CLCKEG  | -28.724 |
| >gi 544279 sp P35555.1 FB | 1428 | CGNGQCLNAPGGYR  | CECDMG  | -37.871 |
| >gi 544279 sp P35555.1 FB | 1469 | CVFGTCHNLPGLFR  | CECEIG  | -37.071 |
| >gi 544279 sp P35555.1 FB | 1480 | LFRCCEIGYELDR   | SGGNCT  | -43.871 |
| >gi 544279 sp P35555.1 FB | 1523 | ICDCPPDFELNPTR  | VGCVDT  | -41.179 |
| >gi 544279 sp P35555.1 FB | 1530 | FELNPTRVGCVDTR  | SGNCYL  | -31.043 |
| >gi 544279 sp P35555.1 FB | 1539 | CVDTRSGNCYLDIR  | PRGDNG  | -36.363 |
| >gi 544279 sp P35555.1 FB | 1541 | DTRSGNCYLDIRPR  | GDNGDT  | -23.513 |
| >gi 544279 sp P35555.1 FB | 1596 | SEYKILCPGGEGFR  | PNPITV  | -40.43  |
| >gi 544279 sp P35555.1 FB | 1632 | GGKCINTFGSFQCR  | CPTGY Y | -30.265 |
| >gi 544279 sp P35555.1 FB | 1644 | CRCPTGYL NEDTR  | VCDDVN  | -42.791 |
| >gi 544279 sp P35555.1 FB | 1691 | YMQVNGGNNC MDMR | RSLCYR  | -39.497 |
| >gi 544279 sp P35555.1 FB | 1692 | MQVNGGNNC MDMRR | SLCYRN  | -24.511 |
| >gi 544279 sp P35555.1 FB | 1697 | GNNC MDMRRSLCYR | NYYADN  | -26.473 |
| >gi 544279 sp P35555.1 FB | 1727 | MTKKMCCCSYNIGR  | AWNKPC  | -34.075 |
| >gi 544279 sp P35555.1 FB | 1752 | PSTDEFATLCGSQR  | PGFVID  | -36.274 |
| >gi 544279 sp P35555.1 FB | 1771 | DIYGLPVDIDECR   | EIPGVC  | -45.619 |
| >gi 544279 sp P35555.1 FB | 1790 | CENGVCINMVG SFR | CECPVG  | -39.49  |
| >gi 544279 sp P35555.1 FB | 1820 | EDIDECQNGPVCQR  | NAECIN  | -23.747 |
| >gi 544279 sp P35555.1 FB | 1832 | QRNAECINTAGSYR  | CDCKPG  | -29.95  |
| >gi 544279 sp P35555.1 FB | 1840 | TAGSYRCDCKPGYR  | FTSTGQ  | -30.38  |
| >gi 544279 sp P35555.1 FB | 1850 | PGYRFTSTGQC NDR | NECQEI  | -44.951 |
| >gi 544279 sp P35555.1 FB | 1897 | DDQTMCLDINE CER | DACGNG  | -47.687 |
| >gi 544279 sp P35555.1 FB | 1906 | NECERDACGNGT CR | NTIGSF  | -30.556 |
| >gi 544279 sp P35555.1 FB | 1915 | NGTCRNTIGSFN CR | CNHGFI  | -33.378 |
| >gi 544279 sp P35555.1 FB | 1943 | DVDECASGNGNL CR | NGQCIN  | -35.701 |
| >gi 544279 sp P35555.1 FB | 1969 | CQCNEG YEVAPDGR | TCVDIN  | -36.734 |
| >gi 544279 sp P35555.1 FB | 1982 | RTCVDINECLLE PR | KCAPGT  | -38.979 |
| >gi 544279 sp P35555.1 FB | 1997 | CAPGTCQNL DGSYR | CICPPG  | -36.022 |
| >gi 544279 sp P35555.1 FB | 2051 | CLCPEGFSLSSSGR  | RCQDLR  | -28.853 |
| >gi 544279 sp P35555.1 FB | 2052 | LCPEGFSLSSSGRR  | CQDLRM  | -18.02  |
| >gi 544279 sp P35555.1 FB | 2057 | FSLSSSGRRRCQDLR | MSYCYA  | -29.954 |
| >gi 544279 sp P35555.1 FB | 2076 | AKFEGGKCSSPKSR  | NHSKQE  | -28.704 |
| >gi 544279 sp P35555.1 FB | 2108 | PCELCPT EPDEAFR | QICPYG  | -42.967 |
| >gi 544279 sp P35555.1 FB | 2150 | CKHGQCINTDGSYR  | CECPFG  | -42.999 |
| >gi 544279 sp P35555.1 FB | 2220 | INECAQNPLLCAFR  | CVNTYG  | -31.418 |
| >gi 544279 sp P35555.1 FB | 2239 | GSYECKCPVGYVLR  | EDRRMC  | -26.407 |
| >gi 544279 sp P35555.1 FB | 2242 | ECKCPVGYVLR EDR | RMCKDE  | -28.877 |
| >gi 544279 sp P35555.1 FB | 2243 | CKCPVGYVLR EDRR | MCKDED  | -23.017 |



|                           |      |                  |        |         |
|---------------------------|------|------------------|--------|---------|
| >gi 544279 sp P35555.1 FB | 2282 | IGTYMCICGPGYQR   | RPDGEG | -29.429 |
| >gi 544279 sp P35555.1 FB | 2283 | GTYMCICGPGYQRR   | PDGEGC | -18.922 |
| >gi 544279 sp P35555.1 FB | 2306 | NECQTKPGICENGR   | CLNTRG | -40.749 |
| >gi 544279 sp P35555.1 FB | 2311 | KPGICENGRCLNTR   | GSYTCE | -26.068 |
| >gi 544279 sp P35555.1 FB | 2335 | FTASPNQDECLDNR   | EGYCFT | -45.64  |
| >gi 544279 sp P35555.1 FB | 2355 | EVLQNMCIQIGSSNR  | NPVTKS | -33.042 |
| >gi 544279 sp P35555.1 FB | 2369 | NPVTKSECCDGGGR   | GWGPHC | -44.6   |
| >gi 544279 sp P35555.1 FB | 2394 | QGTVAFKKLCPHGR   | GFMTNG | -36.233 |
| >gi 544279 sp P35555.1 FB | 2414 | ADIDECKVIHDVCR   | NGECVN | -41.557 |
| >gi 544279 sp P35555.1 FB | 2422 | IHDVCRNGECVNDR   | GSYHCI | -43.678 |
| >gi 544279 sp P35555.1 FB | 2481 | CSCPKEYILQEDGR   | SCKDLD | -37.338 |
| >gi 544279 sp P35555.1 FB | 2554 | CQNTPGSFTCECQR   | GFSLDQ | -44.62  |
| >gi 544279 sp P35555.1 FB | 2576 | SSCEDVDECEGNHR   | CQHGCQ | -38.792 |
| >gi 544279 sp P35555.1 FB | 2589 | RCQHGCQNIIGGYR   | CSCPQG | -36.928 |
| >gi 544279 sp P35555.1 FB | 2680 | EGGYLCGCPPGYFR   | IGQGHC | -40.498 |
| >gi 544279 sp P35555.1 FB | 2694 | IGQGHCVSGMGMGR   | GNPEPP | -30.15  |
| >gi 544279 sp P35555.1 FB | 2726 | EACYECKINGYPKR   | GRKRRS | -20.59  |
| >gi 544279 sp P35555.1 FB | 2728 | CYECKINGYPKRGR   | KRRSTN | -25.872 |
| >gi 544279 sp P35555.1 FB | 2730 | ECKINGYPKRGRKR   | RSTNET | -7.628  |
| >gi 544279 sp P35555.1 FB | 2776 | IFAFNISHVSNKVR   | ILELLP | -31.63  |
| >gi 544279 sp P35555.1 FB | 2792 | ELLPALTTLTNHNHNR | YLIESG | -31.032 |
| >gi 11467963 sp P26006.3  | 38   | AGGCVVSAFNLDR    | FLVVKE | -35.922 |
| >gi 11467963 sp P26006.3  | 60   | NPGSLFGYSVALHR   | QTERQQ | -23.321 |
| >gi 11467963 sp P26006.3  | 64   | LFYGSVALHRQTER   | QQRILL | -21.781 |
| >gi 11467963 sp P26006.3  | 67   | YSVALHRQTERQQR   | YLLLAG | -14.034 |
| >gi 11467963 sp P26006.3  | 76   | ERQQRILLLAGAPR   | ELAVPD | -22.291 |
| >gi 11467963 sp P26006.3  | 87   | APRELAVPDGYTNR   | TGAVYL | -41.305 |
| >gi 11467963 sp P26006.3  | 105  | YLCPLTAHKDDCER   | MNITVK | -50.86  |
| >gi 11467963 sp P26006.3  | 136  | WLGVTVASQGPAGR   | VLVCAH | -35.165 |
| >gi 11467963 sp P26006.3  | 143  | SQGPAGRVLVCAHR   | YTQVLW | -27.623 |
| >gi 11467963 sp P26006.3  | 156  | RYTQVLWVSGSEDQR  | RMVGGK | -43.102 |
| >gi 11467963 sp P26006.3  | 157  | YTQVLWVSGSEDQRR  | MVGGKY | -22.945 |
| >gi 11467963 sp P26006.3  | 165  | SEDQRRMVGGKCYVR  | GNDLEL | -24.393 |
| >gi 11467963 sp P26006.3  | 229  | GAYNWKGNYSYMIQR  | KEWDLS | -41.759 |
| >gi 11467963 sp P26006.3  | 274  | LHPKNITIVTGAPR   | HRHMGA | -30.959 |
| >gi 11467963 sp P26006.3  | 276  | PKNITIVTGAPRHR   | HMGAVF | -30.536 |
| >gi 11467963 sp P26006.3  | 293  | AVFLLSQEAGGDLR   | RRQVLE | -34.526 |
| >gi 11467963 sp P26006.3  | 294  | VFLLSQEAGGDLRR   | RQVLEG | -22.23  |
| >gi 11467963 sp P26006.3  | 295  | FLLSQEAGGDLRRR   | QVLEGS | -19.627 |
| >gi 11467963 sp P26006.3  | 334  | WQDLLVGAPYYFER   | KEEVGG | -44.289 |
| >gi 11467963 sp P26006.3  | 411  | KVYIYHSSSKGLLR   | QPQQVI | -19.792 |
| >gi 11467963 sp P26006.3  | 461  | LLVGSLSDHIVLLR   | ARPVIN | -9.781  |
| >gi 11467963 sp P26006.3  | 463  | VGSLSDHIVLLRAR   | PVINIV | -26.865 |

|                          |      |                 |        |         |
|--------------------------|------|-----------------|--------|---------|
| >gi 11467963 sp P26006.3 | 476  | RPVINIVHKTLVPR  | PAVLDP | -11.375 |
| >gi 11467963 sp P26006.3 | 509  | CFAYNQSAGNPNYR  | RNITLA | -35.922 |
| >gi 11467963 sp P26006.3 | 510  | FAYNQSAGNPNYRR  | NITLAY | -21.707 |
| >gi 11467963 sp P26006.3 | 522  | RRNITLAYTLEADR  | DRRPPR | -42.38  |
| >gi 11467963 sp P26006.3 | 524  | NITLAYTLEADRDR  | RPPRLR | -49.636 |
| >gi 11467963 sp P26006.3 | 525  | ITLAYTLEADRDRR  | PPRLRF | -1.149  |
| >gi 11467963 sp P26006.3 | 528  | AYTLEADRDRRPPR  | LRFAGS | -17.708 |
| >gi 11467963 sp P26006.3 | 530  | TLEADRDRRPPRLR  | FAGSES | -14.239 |
| >gi 11467963 sp P26006.3 | 549  | SAVFHGGFFSMPEMR | CQKLEL | -35.361 |
| >gi 11467963 sp P26006.3 | 562  | RCQKLELLMDNLR   | DKLRPI | -33.601 |
| >gi 11467963 sp P26006.3 | 566  | LELLMDNLRDKLR   | PIIISM | -24.004 |
| >gi 11467963 sp P26006.3 | 579  | RPIIISMNYSPLR   | MPDRPR | -29.073 |
| >gi 11467963 sp P26006.3 | 583  | ISMNYSPLRMPDR   | PRLGLR | -33.393 |
| >gi 11467963 sp P26006.3 | 585  | MNYSPLRMPDRPR   | LGLRSL | -38.341 |
| >gi 11467963 sp P26006.3 | 589  | LPLRMPDRPRLGLR  | SLDAYP | 1.599   |
| >gi 11467963 sp P26006.3 | 628  | CGPDNKCESNLQMR  | AAFVSE | -26.354 |
| >gi 11467963 sp P26006.3 | 641  | RAAFVSEQQQKLSR  | LQYSRD | -26.928 |
| >gi 11467963 sp P26006.3 | 646  | SEQQKLSRLQYSR   | DVRKLL | -15.696 |
| >gi 11467963 sp P26006.3 | 649  | QQKLSRLQYSRDVR  | KLLLSI | -24.241 |
| >gi 11467963 sp P26006.3 | 661  | VRKLLSINVTNTR   | TSERSG | -33.911 |
| >gi 11467963 sp P26006.3 | 665  | LLSINVTNTRTSE   | SGEDAH | -22.889 |
| >gi 11467963 sp P26006.3 | 689  | TLVPPALLSSVR    | PPGACQ | -29.338 |
| >gi 11467963 sp P26006.3 | 710  | NETIFCELGNPFKR  | NQRMEL | -19.798 |
| >gi 11467963 sp P26006.3 | 713  | IFCELGNPFKRNR   | MELLIA | -20.641 |
| >gi 11467963 sp P26006.3 | 730  | LIAFEVIGVTLHTR  | DLQVQL | -26.938 |
| >gi 11467963 sp P26006.3 | 770  | DYTLQTSLSMVNHR  | LQSFFG | -29.191 |
| >gi 11467963 sp P26006.3 | 847  | TEITVHGNGSWPCR  | PPGDLI | -33.299 |
| >gi 11467963 sp P26006.3 | 866  | INPLNLTLSDPGDR  | PSSPQR | -44.847 |
| >gi 11467963 sp P26006.3 | 872  | TLSDPGDRPSSPQR  | RRRQLD | -28.093 |
| >gi 11467963 sp P26006.3 | 873  | LSDPGDRPSSPQRR  | RRQLDP | -16.681 |
| >gi 11467963 sp P26006.3 | 874  | SDPGDRPSSPQRRR  | RQLDPG | -13.701 |
| >gi 11467963 sp P26006.3 | 908  | KAKSETVLTACATGR | AHCVWL | -37.134 |
| >gi 11467963 sp P26006.3 | 932  | PDAPVVTNVTVKAR  | VWNSTF | -28.136 |
| >gi 11467963 sp P26006.3 | 943  | KARVWNSTFIEDYR  | DFDRVR | -43.473 |
| >gi 11467963 sp P26006.3 | 947  | WNSTFIEDYRDFDR  | VRVNGW | -40.827 |
| >gi 11467963 sp P26006.3 | 949  | STFIEDYRDFDRVR  | VNGWAT | -45.203 |
| >gi 11467963 sp P26006.3 | 959  | DRVRVNGWATLFLR  | TSIPTI | -32.669 |
| >gi 11467963 sp P26006.3 | 1021 | LIILLWKCGFFKR   | TRYQI  | -32.701 |
| >gi 11467963 sp P26006.3 | 1023 | ILLLWKCGFFKRTR  | YYQIMP | -20.039 |
| >gi 11467963 sp P26006.3 | 1035 | TRYQIIMPKYHAVR  | IREEER | -27.77  |
| >gi 11467963 sp P26006.3 | 1037 | YYQIIMPKYHAVRIR | EEERYP | -15.234 |
| >gi 11467963 sp P26006.3 | 1041 | MPKYHAVRIREEER  | YPPPGS | -37.643 |
| >gi 11467963 sp P26006.3 | 1062 | LPTKKHWVTSWQTR  | DQYY-- | -24.23  |

|                           |      |                 |        |         |
|---------------------------|------|-----------------|--------|---------|
| >gi 124945 sp P13612.1 IT | 23   | GKRGANPGPEAAVR  | ETVMLL | -30.273 |
| >gi 124945 sp P13612.1 IT | 38   | TVMLLLCLGVPTGR  | PYNVDT | -34.046 |
| >gi 124945 sp P13612.1 IT | 71   | FGYSVVLHSHGANR  | WLLVGA | -33.382 |
| >gi 124945 sp P13612.1 IT | 96   | LANASVINPGAIYR  | CRIGKN | -33.321 |
| >gi 124945 sp P13612.1 IT | 98   | NASVINPGAIYRCR  | IGKNPG | -37.469 |
| >gi 124945 sp P13612.1 IT | 128  | PNGEPCGKTCLEER  | DNQWLG | -43.822 |
| >gi 124945 sp P13612.1 IT | 139  | EERDNQWLVGVTLSR | QPGENG | -25.046 |
| >gi 124945 sp P13612.1 IT | 153  | QPGENGSIIVTCGHR | WKNIFY | -34.912 |
| >gi 124945 sp P13612.1 IT | 179  | LPTGGCYGVPPDLR  | TELSKR | -37.503 |
| >gi 124945 sp P13612.1 IT | 185  | YGVPPDLRTELSKR  | IAPCYQ | -23.533 |
| >gi 124945 sp P13612.1 IT | 267  | GSYLGYSVGAGHFR  | SQHTTE | -28.749 |
| >gi 124945 sp P13612.1 IT | 340  | SDLLVGAPMQSTIR  | EEGRVF | -38.714 |
| >gi 124945 sp P13612.1 IT | 344  | VGAPMQSTIREEGR  | VFVYIN | -37.779 |
| >gi 124945 sp P13612.1 IT | 373  | METNLVGS DKYAAR | FGESIV | -26.806 |
| >gi 124945 sp P13612.1 IT | 412  | EDDLQGAIYIYNGR  | ADGISS | -30.308 |
| >gi 124945 sp P13612.1 IT | 423  | NGRADGISSTFSQR  | IEGLQI | -37.495 |
| >gi 124945 sp P13612.1 IT | 460  | DNNGYVDVAVGAFR  | SDSAVL | -30.01  |
| >gi 124945 sp P13612.1 IT | 468  | AVGAFRSDSAVLLR  | TRPVVI | -27.265 |
| >gi 124945 sp P13612.1 IT | 470  | GAFRSDSAVLLRTR  | PVVIVD | -27.783 |
| >gi 124945 sp P13612.1 IT | 487  | IVDASLSHPESVNR  | TKFDCV | -38.251 |
| >gi 124945 sp P13612.1 IT | 531  | YIVLFYNMSLDVNR  | KAESPP | -36.406 |
| >gi 124945 sp P13612.1 IT | 538  | MSLDVNRKAESPPR  | FYFSSN | -34.758 |
| >gi 124945 sp P13612.1 IT | 559  | TSDVITGSIQVSSR  | EANCRT | -24.257 |
| >gi 124945 sp P13612.1 IT | 564  | TGSIQVSSREANCR  | THQAFM | -32.389 |
| >gi 124945 sp P13612.1 IT | 571  | SREANCRTHQAFMR  | KDVRDI | -37.406 |
| >gi 124945 sp P13612.1 IT | 575  | NCRTHQAFMRKDVR  | DILTPI | -20.491 |
| >gi 124945 sp P13612.1 IT | 626  | KEKDIMKKTINFAR  | FCAHEN | -26.77  |
| >gi 124945 sp P13612.1 IT | 729  | DCSIGIYVDHLSR   | IDISFL | -37.637 |
| >gi 124945 sp P13612.1 IT | 743  | IDISFLLDVSSLSR  | AEEDLS | -30.691 |
| >gi 124945 sp P13612.1 IT | 769  | CENEEEMDNLKHSR  | VTVAIP | -24.779 |
| >gi 124945 sp P13612.1 IT | 865  | QTTTGECHFENYQR  | VCALEQ | -45.431 |
| >gi 124945 sp P13612.1 IT | 884  | QQKSAMQTLKGIVR  | FLSKTD | -18.58  |
| >gi 124945 sp P13612.1 IT | 892  | LKGIVRFLSKTDKR  | LLYCIK | -24.894 |
| >gi 124945 sp P13612.1 IT | 928  | SGKEASVHIQLEGR  | PSILEM | -38.196 |
| >gi 124945 sp P13612.1 IT | 945  | LEMDETSALKFEIR  | ATGFPE | -24.449 |
| >gi 124945 sp P13612.1 IT | 955  | FEIRATGFPEPNPR  | VIELNK | -34.327 |
| >gi 124945 sp P13612.1 IT | 977  | NVAHVLLLEGLHHQR | PKRYFT | -14.231 |
| >gi 124945 sp P13612.1 IT | 980  | HVLEGLHHQRPKR   | YFTIVI | 4.912   |
| >gi 124945 sp P13612.1 IT | 1013 | LISYVMWKAGFFKR  | QYKSIL | -24.664 |
| >gi 124945 sp P13612.1 IT | 1024 | FKRQYKSILQEENR  | RDSWSY | -37.465 |
| >gi 124945 sp P13612.1 IT | 1025 | KRQYKSILQEENRR  | DSWSYI | -24.113 |
| >gi 23831237 sp P08648.2  | 21   | SPLHAVQLRWGPRR  | RPPLL  | -21.793 |
| >gi 23831237 sp P08648.2  | 22   | PLHAVQLRWGPRRR  | PPLLPL | -23.668 |

|                          |     |                 |        |         |
|--------------------------|-----|-----------------|--------|---------|
| >gi 23831237 sp P08648.2 | 38  | LLPLLLLLPPPPR   | VGGFNL | -33.607 |
| >gi 23831237 sp P08648.2 | 68  | PPGSFFGFSVEFYR  | PGTDGV | -39.871 |
| >gi 23831237 sp P08648.2 | 119 | TQCTPIEFDSKGSR  | LLESSL | -28.189 |
| >gi 23831237 sp P08648.2 | 147 | VEYKSLQWFGATVR  | AHGSSI | -33.036 |
| >gi 23831237 sp P08648.2 | 163 | GSSILACAPLYSWR  | TEKEPL | -40.944 |
| >gi 23831237 sp P08648.2 | 185 | PVGTCYLSTDNFTR  | ILEYAP | -41.057 |
| >gi 23831237 sp P08648.2 | 193 | TDNFTRILEYAPCR  | SDFSWA | -44.3   |
| >gi 23831237 sp P08648.2 | 218 | CQGGFSAEFTKTGR  | VVLGGP | -26.275 |
| >gi 23831237 sp P08648.2 | 261 | EYLINLVQGGQLQTR | QASSIY | -25.433 |
| >gi 23831237 sp P08648.2 | 312 | TYGYVTILNGSDIR  | SLYNFS | -34.931 |
| >gi 23831237 sp P08648.2 | 353 | LDDLLVGAPLLMDR  | TPDGRP | -40.834 |
| >gi 23831237 sp P08648.2 | 358 | VGAPLLMDRTPDGR  | PQEVGR | -30.651 |
| >gi 23831237 sp P08648.2 | 364 | MDRTPDGRPQEVGR  | VYVYLQ | -41.388 |
| >gi 23831237 sp P08648.2 | 391 | TPTLTLTGHDEFGR  | FGSSLT | -37.724 |
| >gi 23831237 sp P08648.2 | 461 | AASHTPDFFGSALR  | GGRDLD | -31.155 |
| >gi 23831237 sp P08648.2 | 464 | HTPDFFGSALRGGR  | DLDGNG | 5.092   |
| >gi 23831237 sp P08648.2 | 488 | IVGSFGVDKAVVYR  | GRPIVS | -12.529 |
| >gi 23831237 sp P08648.2 | 490 | GSFGVDKAVVYRGR  | PIVSAS | -29.835 |
| >gi 23831237 sp P08648.2 | 511 | SLTIFPAMFNPEER  | SCSLEG | -40.071 |
| >gi 23831237 sp P08648.2 | 558 | ELQLDWQKQKGGVR  | RALFLA | -25.142 |
| >gi 23831237 sp P08648.2 | 559 | LQLDWQKQKGGVRR  | ALFLAS | -9.692  |
| >gi 23831237 sp P08648.2 | 566 | QKGGVRRALFLASR  | QATLTQ | -27.144 |
| >gi 23831237 sp P08648.2 | 581 | ATLTQTLLIQNGAR  | EDCREM | -35.042 |
| >gi 23831237 sp P08648.2 | 585 | QTLLIQNGAREDCR  | EMKIYL | -35.139 |
| >gi 23831237 sp P08648.2 | 592 | GAREDCREMKIYLR  | NESEFR | -10.494 |
| >gi 23831237 sp P08648.2 | 598 | REMKIYLRNESEFR  | DKLSPI | -40.016 |
| >gi 23831237 sp P08648.2 | 624 | SLDPQAPVDSHGLR  | PALHYQ | -18.73  |
| >gi 23831237 sp P08648.2 | 634 | HGLRPALHYQSKSR  | IEDKAQ | -36.098 |
| >gi 23831237 sp P08648.2 | 694 | QNVGEGGAYEAELR  | VTAPPE | -40.422 |
| >gi 23831237 sp P08648.2 | 708 | VTAPPEAEYSGLVR  | HPGNFS | -28.574 |
| >gi 23831237 sp P08648.2 | 727 | SSLSCDYFAVNQSR  | LLVCDL | -32.091 |
| >gi 23831237 sp P08648.2 | 748 | NPMKAGASLWGGLR  | FTVPHL | -32.387 |
| >gi 23831237 sp P08648.2 | 755 | SLWGGLRFTVPHLR  | DTKKTl | -23.334 |
| >gi 23831237 sp P08648.2 | 783 | KNLNNSQSDVVSFR  | LSVEAQ | -35.332 |
| >gi 23831237 sp P08648.2 | 813 | PEAVLFPVSDWHPR  | DQPQKE | -31.829 |
| >gi 23831237 sp P08648.2 | 863 | PQALEGQQLLYVTR  | VTGLNC | -30.696 |
| >gi 23831237 sp P08648.2 | 899 | GSLHHQQKREAPSR  | SSASSG | -19.497 |
| >gi 23831237 sp P08648.2 | 918 | GPQILKCPEAECFR  | LRCELG | -47.63  |
| >gi 23831237 sp P08648.2 | 920 | QILKCPEAECFRLR  | CELGPL | -44.006 |
| >gi 23831237 sp P08648.2 | 939 | LHQQESQSLQLHFR  | VWAKTF | -39.1   |
| >gi 23831237 sp P08648.2 | 948 | QLHFRVWAKTFLQR  | EHQPFS | -26.672 |
| >gi 23831237 sp P08648.2 | 969 | QCEAVYKALKMPYR  | ILPRQL | -31.459 |
| >gi 23831237 sp P08648.2 | 973 | VYKALKMPYRILPR  | QLPQKE | -1.671  |

|                          |      |                  |        |         |
|--------------------------|------|------------------|--------|---------|
| >gi 23831237 sp P08648.2 | 980  | PYRILPRQLPQKER   | QVATAV | -27.435 |
| >gi 23831237 sp P08648.2 | 1028 | LLIYILYKLGFFKR   | SLPYGT | -14.469 |
| >gi 12644170 sp P23229.3 | 29   | LLSRLGAAFNLDTR   | EDNVIR | -37.188 |
| >gi 12644170 sp P23229.3 | 35   | AAFNLDTREDNVIR   | KYGDPG | -45.968 |
| >gi 12644170 sp P23229.3 | 60   | SLAMHWQLQPEDKR   | LLLVGA | -34.687 |
| >gi 12644170 sp P23229.3 | 68   | QPEDKRLLLVGAPR   | GEALPL | -30.066 |
| >gi 12644170 sp P23229.3 | 76   | LVGAPRGEALPLQR   | ANRTGG | -23.458 |
| >gi 12644170 sp P23229.3 | 79   | APRGEALPLQRANR   | TGGLYS | -11.694 |
| >gi 12644170 sp P23229.3 | 91   | NRTGGLYSCDITAR   | GPCTRI | -30.398 |
| >gi 12644170 sp P23229.3 | 96   | LYSCDITARGPCTR   | IEFDND | -31.079 |
| >gi 12644170 sp P23229.3 | 134  | SQGGKVVVTCADR    | YEKRQH | -35.458 |
| >gi 12644170 sp P23229.3 | 138  | GGKVVVTCADRHYEKR | QHVNTK | -19.342 |
| >gi 12644170 sp P23229.3 | 148  | YEKRQHVNTKQESR   | DIFGRC | -16.974 |
| >gi 12644170 sp P23229.3 | 153  | HVNTKQESRDIFGR   | CYVLSQ | -17.553 |
| >gi 12644170 sp P23229.3 | 162  | DIFGRCYVLSQNL    | IEDDMD | -34.35  |
| >gi 12644170 sp P23229.3 | 178  | DDMDGGDWSFCDGR   | LRGHEK | -36.854 |
| >gi 12644170 sp P23229.3 | 180  | MDGGDWSFCDGRLR   | GHEKFG | -40.527 |
| >gi 12644170 sp P23229.3 | 218  | FGAPGTYNWKGIVR   | VEQKNN | -30.002 |
| >gi 12644170 sp P23229.3 | 279  | VSYTDPDQFVYKTR   | PPREQP | -30.01  |
| >gi 12644170 sp P23229.3 | 282  | TDPDQFVYKTRPPR   | EQPDTF | 7.654   |
| >gi 12644170 sp P23229.3 | 321  | VSKDEITFVSGAPR   | ANHSGA | -24.942 |
| >gi 12644170 sp P23229.3 | 333  | PRANHSGAVVLLKR   | DMKSAH | -21.822 |
| >gi 12644170 sp P23229.3 | 382  | WQDIVIGAPQYFDR   | DGEVGG | -38.19  |
| >gi 12644170 sp P23229.3 | 399  | VGGAVVYMNQQGR    | WNNVKP | -35.24  |
| >gi 12644170 sp P23229.3 | 407  | MNQQGRWNNVKPIR   | LNGTKD | -29.162 |
| >gi 12644170 sp P23229.3 | 483  | YFGYSIAGNMDLDR   | NSYPDV | -45.244 |
| >gi 12644170 sp P23229.3 | 502  | VAVGSLSDSVTIFR   | SRPVIN | -31.181 |
| >gi 12644170 sp P23229.3 | 504  | VGSLSDSVTIFRSR   | PVINIQ | -27.124 |
| >gi 12644170 sp P23229.3 | 519  | VINIQTITVTPNR    | IDLRQK | -36.468 |
| >gi 12644170 sp P23229.3 | 523  | QKTITVTPNRIDLR   | QKTACG | -21.015 |
| >gi 12644170 sp P23229.3 | 567  | SISIVGTLEAEKER   | RKSGLS | -47.022 |
| >gi 12644170 sp P23229.3 | 568  | ISIVGTLEAEKERR   | KSGLSS | -18.143 |
| >gi 12644170 sp P23229.3 | 575  | EAEKERRKSGLSSR   | VQFRNQ | -30.502 |
| >gi 12644170 sp P23229.3 | 579  | ERRKSGLSSRVQFR   | NQGSEP | -17.979 |
| >gi 12644170 sp P23229.3 | 595  | GSEPKYTQELTLKR   | QKQKVC | -22.698 |
| >gi 12644170 sp P23229.3 | 613  | VCMEETLWLQDNIR   | DKLRPI | -37.692 |
| >gi 12644170 sp P23229.3 | 617  | ETLWLQDNIRDKLR   | PIPITA | -28.337 |
| >gi 12644170 sp P23229.3 | 633  | PITASVEIQEPSSR   | RRVNSL | -35.318 |
| >gi 12644170 sp P23229.3 | 634  | ITASVEIQEPSSRR   | RVNSLP | -20.968 |
| >gi 12644170 sp P23229.3 | 635  | TASVEIQEPSSRRR   | VNSLPE | -20.121 |
| >gi 12644170 sp P23229.3 | 684  | CNSNLKLEYKFCR    | EGNQDK | -29.237 |
| >gi 12644170 sp P23229.3 | 725  | ALEITVTNPSNPR    | NPTKDG | -25.269 |
| >gi 12644170 sp P23229.3 | 753  | IATFPDTLTY SAYR  | ELRAFP | -36.373 |

|                           |      |                 |        |         |
|---------------------------|------|-----------------|--------|---------|
| >gi 12644170 sp P23229.3  | 756  | FPDTLTYSAYRELR  | AFPEKQ | -19.381 |
| >gi 12644170 sp P23229.3  | 784  | GSQADCELGNPFKR  | NSNVTF | -17.503 |
| >gi 12644170 sp P23229.3  | 874  | SEDEVGSLIEYFR   | VINLGK | -46.196 |
| >gi 12644170 sp P23229.3  | 938  | EINSLNLTESHNSR  | KKREIT | -33.549 |
| >gi 12644170 sp P23229.3  | 952  | KKREITEKQIDDNR  | KFSLFA | -43.472 |
| >gi 12644170 sp P23229.3  | 960  | QIDDNRKFSLFAER  | KYQTLN | -40.236 |
| >gi 12644170 sp P23229.3  | 977  | TLNCSVNVNCVNIR  | CPLRGL | -35.537 |
| >gi 12644170 sp P23229.3  | 981  | SVNVNCVNIRCPLR  | GLDSKA | -23.306 |
| >gi 12644170 sp P23229.3  | 992  | PLRGLDSKASLILR  | SRLWNS | -23.762 |
| >gi 12644170 sp P23229.3  | 994  | RGLDSKASLILRSR  | LWNSTF | -33.043 |
| >gi 12644170 sp P23229.3  | 1015 | EEYSKLNLYLDILMR | AFIDVT | -32.747 |
| >gi 12644170 sp P23229.3  | 1028 | RAFIDVTAANAENIR | LPNAGT | -40.43  |
| >gi 12644170 sp P23229.3  | 1037 | AENIRLPNAGTQVR  | VTVFPS | -30.881 |
| >gi 12644170 sp P23229.3  | 1083 | LLVFILWKCGFFKR  | SRYDDS | -26.192 |
| >gi 12644170 sp P23229.3  | 1085 | VFILWKCGFFKRSR  | YDDSV  | -14.444 |
| >gi 12644170 sp P23229.3  | 1092 | GFFKRSRYDDSVPR  | YHAVRI | -45.846 |
| >gi 12644170 sp P23229.3  | 1097 | SRYDDSVPRYHAVR  | IRKEER | -27.002 |
| >gi 12644170 sp P23229.3  | 1099 | YDDSVPRYHAVRIR  | KEEREI | -29.52  |
| >gi 12644170 sp P23229.3  | 1103 | VPRYHAVRIRKEER  | EIKDEK | -22.829 |
| >gi 12644170 sp P23229.3  | 1125 | DNLEKKQWITKWNR  | NESYS- | -33.161 |
| >gi 4504763 ref NP_002201 | 29   | LPLLLSGLLLPLCR  | AFNLDV | -33.022 |
| >gi 4504763 ref NP_002201 | 63   | GFAVDFFVPSASSR  | MFLLVG | -29.957 |
| >gi 4504763 ref NP_002201 | 95   | EGGQVLKCDWSSTR  | RCQPIE | -40.935 |
| >gi 4504763 ref NP_002201 | 96   | GGQVLKCDWSSTRR  | CQPIEF | -22.115 |
| >gi 4504763 ref NP_002201 | 108  | RRCQPIEFDATGNR  | DYAKDD | -40.979 |
| >gi 4504763 ref NP_002201 | 129  | LEFKSHQWFGASVR  | SKQDKI | -25.639 |
| >gi 4504763 ref NP_002201 | 145  | QDKILACAPLYHWR  | TEMKQE | -41.839 |
| >gi 4504763 ref NP_002201 | 152  | APLYHWRTEMKQER  | EPVGTC | -30.262 |
| >gi 4504763 ref NP_002201 | 173  | LQDGTKTVEYAPCR  | SQDIDA | -43.616 |
| >gi 4504763 ref NP_002201 | 198  | CQGGFSIDFTKADR  | VLLGGP | -36.629 |
| >gi 4504763 ref NP_002201 | 241  | NVYSIKYNNQLATR  | TAQAIF | -34.932 |
| >gi 4504763 ref NP_002201 | 275  | NGDGIDDFVSGVPR  | AARTLG | -20.358 |
| >gi 4504763 ref NP_002201 | 278  | GIDDFVSGVPRAAR  | TLGMVY | -6.576  |
| >gi 4504763 ref NP_002201 | 333  | YADVFIGAPLFMDR  | GSDGKL | -34.478 |
| >gi 4504763 ref NP_002201 | 351  | KLQEVGQVSVSLQR  | ASGDFQ | -22.122 |
| >gi 4504763 ref NP_002201 | 369  | FQTTKLNQFEVFAR  | FGSAIA | -29.2   |
| >gi 4504763 ref NP_002201 | 409  | GEDKKGIVYIFNGR  | STGLNA | -26.662 |
| >gi 4504763 ref NP_002201 | 428  | AVPSQILEGQWAAR  | SMPPSF | -30.726 |
| >gi 4504763 ref NP_002201 | 461  | GYPDLIVGAFGVDR  | AILYRA | -36.053 |
| >gi 4504763 ref NP_002201 | 466  | IVGAFGVDRAILYR  | ARPVIT | -10.039 |
| >gi 4504763 ref NP_002201 | 468  | GAFGVDRAILYRAR  | PVITVN | -31.147 |
| >gi 4504763 ref NP_002201 | 506  | LPGTALKVSCFNVR  | FCLKAD | -37.381 |
| >gi 4504763 ref NP_002201 | 519  | RFCLKADGKGVLP   | KLNFQV | -16.743 |

|                           |      |                 |         |         |
|---------------------------|------|-----------------|---------|---------|
| >gi 4504763 ref NP_002201 | 539  | ELLLDKLKQKGAIR  | RALFLY  | -27.882 |
| >gi 4504763 ref NP_002201 | 540  | LLLDKQKGAIRR    | ALFLYS  | -10.005 |
| >gi 4504763 ref NP_002201 | 547  | QKGAIRRALFLYSR  | SPSHSK  | -26.464 |
| >gi 4504763 ref NP_002201 | 559  | SRSPSHSKNMTISR  | GGLMQC  | -30.367 |
| >gi 4504763 ref NP_002201 | 573  | GGLMQCEELIAYLR  | DESEFR  | -31.718 |
| >gi 4504763 ref NP_002201 | 579  | EELIAYLRDESEFR  | DKLTPI  | -46.267 |
| >gi 4504763 ref NP_002201 | 592  | RDKLTPITIFMEYR  | LDYRTA  | -42.632 |
| >gi 4504763 ref NP_002201 | 596  | TPITIFMEYRLDYR  | TAADTT  | -36.499 |
| >gi 4504763 ref NP_002201 | 618  | QPILNQFTPANISR  | QAHILL  | -24.772 |
| >gi 4504763 ref NP_002201 | 688  | VSIPLQADFIGVVR  | NNEALA  | -32.461 |
| >gi 4504763 ref NP_002201 | 695  | DFIGVVRNNEALAR  | LSCAFK  | -35.939 |
| >gi 4504763 ref NP_002201 | 707  | ARLSCAFKTENQTR  | QVVC DL | -30.457 |
| >gi 4504763 ref NP_002201 | 728  | NPMKAGTQLLAGLR  | FSVHQQ  | -25.253 |
| >gi 4504763 ref NP_002201 | 775  | HKVDLAVLAAVEIR  | GVSSPD  | -22.718 |
| >gi 4504763 ref NP_002201 | 813  | EDVGPVVQHIYELR  | NNGPSS  | -28.098 |
| >gi 4504763 ref NP_002201 | 862  | PMNCTSDMEINPLR  | IKISSL  | -39.001 |
| >gi 4504763 ref NP_002201 | 883  | TTEKNDTVAGQGER  | DHLITK  | -36.901 |
| >gi 4504763 ref NP_002201 | 918  | GVAQCLKIVCQVGR  | LDRGKS  | -39.103 |
| >gi 4504763 ref NP_002201 | 921  | QCLKIVCQVGR LDR | GKSAIL  | -18.949 |
| >gi 4504763 ref NP_002201 | 1017 | GLLLAVLVFVMYR   | MGFFKR  | -34.103 |
| >gi 4504763 ref NP_002201 | 1023 | VLVFMVYRMGFFKR  | VRPPQE  | -30.703 |
| >gi 4504763 ref NP_002201 | 1025 | VFVMYRMGFFKRVR  | PPQEEQ  | -14.482 |
| >gi 4504763 ref NP_002201 | 1033 | FFKRV RPPQEEQER | EQLQPH  | -46.085 |
| >gi 11342666 ref NP_00452 | 98   | QTGDLQNTIETMR   | KPRCGN  | -37.865 |
| >gi 11342666 ref NP_00452 | 115  | CGNPDVANYNFFPR  | KPKWDK  | -35.045 |
| >gi 11342666 ref NP_00452 | 127  | PRKPKWDKNQITYR  | IIGYTP  | -31.529 |
| >gi 11342666 ref NP_00452 | 146  | PDLDPETVDDAFAR  | AFQVWS  | -41.68  |
| >gi 11342666 ref NP_00452 | 158  | ARAFQVWSDVTPLR  | FSRIHD  | -31.342 |
| >gi 11342666 ref NP_00452 | 161  | FQVWSDVTPLRFSR  | IHDGEA  | -23.266 |
| >gi 11342666 ref NP_00452 | 175  | IHDGEADIMINFR   | WEHGDG  | -41.867 |
| >gi 11342666 ref NP_00452 | 222  | DDELWTLGEGQVVR  | VKYGNA  | -37.422 |
| >gi 11342666 ref NP_00452 | 252  | FNGKEYNSCTDTGR  | SDGFLW  | -36.971 |
| >gi 11342666 ref NP_00452 | 296  | GGNAEQPCKFPFR   | FQGTSY  | -33.746 |
| >gi 11342666 ref NP_00452 | 310  | FQGTSYDSC TTEGR | TDGYRW  | -39.638 |
| >gi 11342666 ref NP_00452 | 315  | YDSC TTEGRTDGYR | WCGTTE  | -38.18  |
| >gi 11342666 ref NP_00452 | 325  | DGYRWCGTTEDYDR  | DKKYGF  | -49.859 |
| >gi 11342666 ref NP_00452 | 368  | FLGNKYESCTSAGR  | SDGKMW  | -34.152 |
| >gi 11342666 ref NP_00452 | 385  | KMWCATTANYDDDR  | KWGFCP  | -52.603 |
| >gi 11342666 ref NP_00452 | 432  | ALMAPIYTYKNFR   | LSQDDI  | -31.181 |
| >gi 11342666 ref NP_00452 | 482  | CKQDIVFDGIAQIR  | GEIFFF  | -35.639 |
| >gi 11342666 ref NP_00452 | 491  | IAQIRGEIFFFKDR  | FIWRTV  | -38.653 |
| >gi 11342666 ref NP_00452 | 495  | RGEIFFFKDRFIWR  | TVTPRD  | -32.319 |
| >gi 11342666 ref NP_00452 | 500  | FFKDRFIWRTVTPR  | DKPMGP  | -1.609  |

|                           |     |                 |         |         |
|---------------------------|-----|-----------------|---------|---------|
| >gi 11342666 ref NP_00452 | 550 | GNEYWIYSASTLER  | GYPKPL  | -38.891 |
| >gi 11342666 ref NP_00452 | 567 | KPLTSLGLPPDVQR  | VDAAFN  | -36.836 |
| >gi 11342666 ref NP_00452 | 590 | NKKTYIFAGDKFWR  | YNEVKK  | -30.527 |
| >gi 4505217 ref NP_002413 | 25  | VAVCSAYPLDGAAR  | GEDTSM  | -38.237 |
| >gi 4505217 ref NP_002413 | 53  | NYDDLKDKVKQFVR  | RKDSGP  | -21.631 |
| >gi 4505217 ref NP_002413 | 54  | YYDLKDKVKQFVRR  | KDSGPV  | -20.879 |
| >gi 4505217 ref NP_002413 | 65  | VRRKDSGPVVKKIR  | EMQKFL  | -15.132 |
| >gi 4505217 ref NP_002413 | 88  | VTGKLSDTLEVMR   | KPRCGV  | -40.131 |
| >gi 4505217 ref NP_002413 | 101 | RKPRCGVPDVGHFR  | TFPGIP  | -43.359 |
| >gi 4505217 ref NP_002413 | 110 | VGHFRTFPGIPKWR  | KTHLTY  | -31.838 |
| >gi 4505217 ref NP_002413 | 117 | PGIPKWRKTHLTYR  | IVNYTP  | -30.456 |
| >gi 4505217 ref NP_002413 | 151 | LKVWEEVPTLTFSR  | LYEGEA  | -38.939 |
| >gi 4505217 ref NP_002413 | 166 | YEGEADIMISFAVR  | EHGDFY  | -38.83  |
| >gi 4505217 ref NP_002413 | 248 | LMYPLYHSLDLTR   | FRLSQD  | -34.194 |
| >gi 4505217 ref NP_002413 | 250 | YPLYHSLDLTRFR   | LSQDDI  | -39.072 |
| >gi 4505217 ref NP_002413 | 303 | CDPALSFDAVSTLR  | GEILIF  | -31.119 |
| >gi 4505217 ref NP_002413 | 312 | VSTLRGEILIFKDR  | HFWRKS  | -36.868 |
| >gi 4505217 ref NP_002413 | 316 | RGEILIFKDRHFWR  | KSLRKL  | -29.023 |
| >gi 4505217 ref NP_002413 | 320 | LIFKDRHFWRKSLR  | KLEPEL  | -20.232 |
| >gi 4505217 ref NP_002413 | 364 | LVFIFKGNQFWAIR  | GNEVRA  | -35.948 |
| >gi 4505217 ref NP_002413 | 369 | KGNQFWAIRGNEVR  | AGYPRG  | -22.699 |
| >gi 4505217 ref NP_002413 | 374 | WAIRGNEVRAGYPR  | GIHTLG  | -19.411 |
| >gi 4505217 ref NP_002413 | 386 | PRGIHTLGFPTVR   | KIDAAI  | -33.988 |
| >gi 4505217 ref NP_002413 | 410 | KNKTYFFVEDKYWR  | FDEKRN  | -36.733 |
| >gi 4505217 ref NP_002413 | 415 | FFVEDKYWRFDEKR  | NSMEPG  | -17.333 |
| >gi 60392771 sp P50281.2  | 51  | WLQQYGYLPPGDLR  | THTQRS  | -37.213 |
| >gi 60392771 sp P50281.2  | 56  | GYLPPGDLRTHTQR  | SPQSL   | 3.955   |
| >gi 60392771 sp P50281.2  | 89  | VTGKADADTMKAMR  | RPRCGV  | -15.535 |
| >gi 60392771 sp P50281.2  | 90  | TGKADADTMKAMRR  | PRCGVP  | -21.645 |
| >gi 60392771 sp P50281.2  | 92  | KADADTMKAMRRPR  | CGVPDK  | 4.991   |
| >gi 60392771 sp P50281.2  | 108 | VPDKFGAEIKANVR  | RKRYAI  | -28.621 |
| >gi 60392771 sp P50281.2  | 109 | PDKFGAEIKANVRR  | KRYAIQ  | -21.041 |
| >gi 60392771 sp P50281.2  | 145 | TPKVGGEYATYEAIR | KAFRVW  | -38.404 |
| >gi 60392771 sp P50281.2  | 149 | GEYATYEAIRKAFR  | VWESAT  | -29.938 |
| >gi 60392771 sp P50281.2  | 158 | RKAFRVWESATPLR  | FREVPY  | -26.945 |
| >gi 60392771 sp P50281.2  | 160 | AFRVWESATPLRFR  | EVPIYAY | -26.619 |
| >gi 60392771 sp P50281.2  | 168 | TPLRFREVPYAYIR  | EGHEKQ  | -37.729 |
| >gi 60392771 sp P50281.2  | 224 | GDTHFDSAEPWTVR  | NEDLNG  | -38.676 |
| >gi 60392771 sp P50281.2  | 276 | WMDTENFVLPDDDR  | RGIQQL  | -48.358 |
| >gi 60392771 sp P50281.2  | 277 | MDTENFVLPDDDRR  | GIQQLY  | -30.228 |
| >gi 60392771 sp P50281.2  | 298 | GESGFPTKMPPQPR  | TTSRPS  | -30.39  |
| >gi 60392771 sp P50281.2  | 302 | FPTKMPPQPRRTTSR | PSVPDK  | -17.846 |
| >gi 60392771 sp P50281.2  | 330 | NICDGNFDTVAMLR  | GEMFVF  | -32.895 |



|                           |     |                |        |         |
|---------------------------|-----|----------------|--------|---------|
| >gi 60392771 sp P50281.2  | 339 | VAMLRGEMFVFKER | WFWRVR | -46.843 |
| >gi 60392771 sp P50281.2  | 343 | RGEMFVFKERWFWR | VRNNQV | -34.581 |
| >gi 60392771 sp P50281.2  | 345 | EMFVFKERWFWRVR | NNQVMD | -35.83  |
| >gi 60392771 sp P50281.2  | 362 | VMDGYPMPIGQFWR | GLPASI | -32.702 |
| >gi 60392771 sp P50281.2  | 374 | WRGLPASINTAYER | KDGKfV | -43.839 |
| >gi 60392771 sp P50281.2  | 408 | LEPGYPKHIKELGR | GLPTDK | -26.97  |
| >gi 60392771 sp P50281.2  | 431 | ALFWMPNGKTYFFR | GNKYYR | -28.699 |
| >gi 60392771 sp P50281.2  | 437 | NGKTYFFRGNKYYR | FNEELR | -13.581 |
| >gi 60392771 sp P50281.2  | 443 | FRGNKYRFNEELR  | AVDSEY | -30.989 |
| >gi 60392771 sp P50281.2  | 464 | KNIKVWEGIPESPR | GSFMGS | -31.36  |
| >gi 60392771 sp P50281.2  | 503 | KLKVEPGYPKSALR | DWMGCP | -26.092 |
| >gi 60392771 sp P50281.2  | 513 | SALRDWMGCPGGR  | PDEGTE | -37.583 |
| >gi 60392771 sp P50281.2  | 563 | LLVLAVGLAVFFFR | RHGTPR | -39.925 |
| >gi 60392771 sp P50281.2  | 564 | LVLAVGLAVFFFR  | HGTPRR | -24.301 |
| >gi 60392771 sp P50281.2  | 569 | GLAVFFRRHGTPR  | RLLYCQ | -17.605 |
| >gi 60392771 sp P50281.2  | 570 | LAVFFRRHGTPRR  | LLYCQR | -20.655 |
| >gi 60392771 sp P50281.2  | 576 | RRHGTPRRLLYCQR | SLLDKV | -27.77  |
| >gi 3041669 sp P51512.2 M | 59  | WLQKYGYLPPTDPR | MSVLRS | -30.448 |
| >gi 3041669 sp P51512.2 M | 64  | GYLPPTDPRMSVLR | SAETMQ | -16.386 |
| >gi 3041669 sp P51512.2 M | 90  | QQFYGINMTGKVDR | NTIDWM | -24.701 |
| >gi 3041669 sp P51512.2 M | 100 | KVDRNTIDWMKKPR | CGVPDQ | -22.943 |
| >gi 3041669 sp P51512.2 M | 108 | WMKKPRCGVPDQTR | GSSKFH | -27.838 |
| >gi 3041669 sp P51512.2 M | 116 | VPDQTRGSSKFHIR | RKRYAL | -26.497 |
| >gi 3041669 sp P51512.2 M | 117 | PDQTRGSSKFHIRR | KRYALT | -18.414 |
| >gi 3041669 sp P51512.2 M | 149 | IKNVTPKVGDPETR | KAIRRA | -38.506 |
| >gi 3041669 sp P51512.2 M | 153 | TPKVGDPETRAIR  | RAFDVW | -1.876  |
| >gi 3041669 sp P51512.2 M | 154 | PKVGDPETRAIRR  | AFDVWQ | -9.994  |
| >gi 3041669 sp P51512.2 M | 180 | FEEVYSELENGKR  | DVDITI | -20.011 |
| >gi 3041669 sp P51512.2 M | 301 | KIYGPPDKIPPPTR | PLPTVP | -33.431 |
| >gi 3041669 sp P51512.2 M | 310 | PPPTRPLTPVPPHR | SIPPAD | -20.709 |
| >gi 3041669 sp P51512.2 M | 318 | TVPPHRSIPPADPR | KNDRPK | -34.937 |
| >gi 3041669 sp P51512.2 M | 322 | HRSIPPADPRKNDR | PKPPRP | -20.614 |
| >gi 3041669 sp P51512.2 M | 327 | PADPRKNDRPKPPR | PPTGRP | 1.976   |
| >gi 3041669 sp P51512.2 M | 332 | KNDRPKPPRPPTGR | PSYPGA | -20.466 |
| >gi 3041669 sp P51512.2 M | 354 | NICDGNFNTLAILR | REMFVF | -31.294 |
| >gi 3041669 sp P51512.2 M | 355 | ICDGNFNTLAILRR | EMFVFK | -15.516 |
| >gi 3041669 sp P51512.2 M | 367 | RREMFVFKDQWFWR | VRNNRV | -42.22  |
| >gi 3041669 sp P51512.2 M | 369 | EMFVFKDQWFWRVR | NNRVMD | -35.49  |
| >gi 3041669 sp P51512.2 M | 372 | VFKDQWFWRVRNNR | VMDGYP | -21.529 |
| >gi 3041669 sp P51512.2 M | 386 | VMDGYPMQITYFWR | GLPPSI | -36.942 |
| >gi 3041669 sp P51512.2 M | 458 | WEDVGKTYFFKGDR | YWRYSE | -39.117 |
| >gi 3041669 sp P51512.2 M | 461 | VGKTYFFKGDYWR  | YSEEMK | -22.734 |
| >gi 3041669 sp P51512.2 M | 523 | FNNQILKVEPGYPR | SILKDF | -30.449 |

|                           |     |                 |        |         |
|---------------------------|-----|-----------------|--------|---------|
| >gi 3041669 sp P51512.2 M | 538 | ILKDFMGCDGPTDR  | VKEGHS | -44.876 |
| >gi 3041669 sp P51512.2 M | 589 | CLLVLVYTVFQFKR  | KGTPRH | -25.71  |
| >gi 3041669 sp P51512.2 M | 594 | VYTVFQFKRKGTPR  | HILYCK | -15.032 |
| >gi 3041669 sp P51512.2 M | 601 | KRKGTPRHILYCKR  | SMQEWV | -32.511 |
| >gi 27446748 gb AAL47576. | 33  | QDAQPTQHGLPELR  | QEAEAF | -32.829 |
| >gi 27446748 gb AAL47576. | 60  | SEQGSKAPASAQFR  | NAIREF | -27.197 |
| >gi 27446748 gb AAL47576. | 64  | SKAPASAQFRNAIR  | EFQWIS | -29.766 |
| >gi 27446748 gb AAL47576. | 84  | QLPLSGVLDQATLR  | QMTRPR | -39.389 |
| >gi 27446748 gb AAL47576. | 88  | SGVLDQATLRQMTR  | PRCGVA | -22.562 |
| >gi 27446748 gb AAL47576. | 90  | VLDQATLRQMTRPR  | CGVADT | -28.448 |
| >gi 27446748 gb AAL47576. | 105 | GVADTDSHATWTER  | ISTLLA | -37.98  |
| >gi 27446748 gb AAL47576. | 114 | TWTERISTLLAGHR  | AKMRRK | -25     |
| >gi 27446748 gb AAL47576. | 118 | RISTLLAGHRAKMR  | RKKRFA | -23.073 |
| >gi 27446748 gb AAL47576. | 119 | ISTLLAGHRAKMR   | KKRFAK | -14.352 |
| >gi 27446748 gb AAL47576. | 138 | KPGNKWYKQHLSYR  | LVNWPE | -31.963 |
| >gi 27446748 gb AAL47576. | 145 | KQHLSYRLVNWPER  | LPEPAV | -41.248 |
| >gi 27446748 gb AAL47576. | 152 | LVNWPERLPEPAVR  | GAVRAA | -28.126 |
| >gi 27446748 gb AAL47576. | 156 | PERLPEPAVRGAVR  | AAFQLW | -18.657 |
| >gi 27446748 gb AAL47576. | 182 | EFWEAPATGPADIR  | LTFFQG | -38.569 |
| >gi 27446748 gb AAL47576. | 212 | DGPGGALAHAF LPR | RGEAHF | -25.823 |
| >gi 27446748 gb AAL47576. | 213 | GPGGALAHAF LPRR | GEAHFD | -24.45  |
| >gi 27446748 gb AAL47576. | 223 | LPRRGEAHFDGDER  | WLSRRL | -51.725 |
| >gi 27446748 gb AAL47576. | 228 | EAHFDGDERWLSLR  | RRGRNL | -25.105 |
| >gi 27446748 gb AAL47576. | 229 | AHFDGDERWLSRRL  | RGRNLF | -22.487 |
| >gi 27446748 gb AAL47576. | 230 | HFDGDERWLSRRLR  | GRNLV  | -16.213 |
| >gi 27446748 gb AAL47576. | 232 | DGDERWLSRRLRGR  | NLFVVL | 10.493  |
| >gi 27446748 gb AAL47576. | 255 | IGHTLGLTHSPAPR  | ALMAPY | -20.349 |
| >gi 27446748 gb AAL47576. | 267 | PRALMAPYKKLGR   | DALLSW | 0.966   |
| >gi 27446748 gb AAL47576. | 289 | VLAVQSLYGKPLGR  | SVATQL | -16.491 |
| >gi 27446748 gb AAL47576. | 314 | TDFEAWDPHNSQSR  | RPETRG | -25.6   |
| >gi 27446748 gb AAL47576. | 315 | DFEAWDPHNSQSRR  | PETRGP | -19.814 |
| >gi 27446748 gb AAL47576. | 319 | WDPHNSQSRRPETR  | GPKYCH | -14.399 |
| >gi 27446748 gb AAL47576. | 338 | HSSFDAITVDGQWR  | LYVFKG | -46.98  |
| >gi 27446748 gb AAL47576. | 360 | FWEVTVDGNVSEPR  | PLQKRW | -29.107 |
| >gi 27446748 gb AAL47576. | 365 | VDGNVSEPRPLQKR  | WPGLPP | -18.419 |
| >gi 27446748 gb AAL47576. | 392 | SLEDGDFYFFKGNR  | CWRFQG | -18.837 |
| >gi 27446748 gb AAL47576. | 395 | DGDFYFFKGNRCWR  | FQGTKS | -21.022 |
| >gi 27446748 gb AAL47576. | 410 | QGTKSVWGFALQCR  | AGGLPR | -30.861 |
| >gi 27446748 gb AAL47576. | 416 | WGFAQLCRAGGLPR  | HPDAAL | -23.07  |
| >gi 27446748 gb AAL47576. | 428 | PRHPDAALFFPPLR  | RLVLFK | -33.024 |
| >gi 27446748 gb AAL47576. | 429 | RHPDAALFFPPLRR  | LVLFKG | -25.638 |
| >gi 27446748 gb AAL47576. | 437 | FPPLRRLVLFKGSR  | YYVLAQ | -18.612 |
| >gi 27446748 gb AAL47576. | 454 | LAQGGMQVEPYPR   | SLRDWA | -29.541 |

|                           |     |                |        |         |
|---------------------------|-----|----------------|--------|---------|
| >gi 27446748 gb AAL47576. | 457 | GGMQVEPYPRSLR  | DWAGVP | -4.254  |
| >gi 27446748 gb AAL47576. | 472 | WAGVPEEVSGALPR | PDGSII | -27.403 |
| >gi 27446748 gb AAL47576. | 481 | GALPRPDGSIIFFR | DDHYWH | -24.716 |
| >gi 27446748 gb AAL47576. | 494 | RDDHYWHLDQAKLR | VTSSGR | -36.521 |
| >gi 27446748 gb AAL47576. | 500 | HLDQAKLRVTSSGR | WATELS | -31.6   |
| >gi 132329 sp P00796.1 RE | 30  | PCTFSLPTGTTFER | IPLKKM | -43.442 |
| >gi 132329 sp P00796.1 RE | 40  | TFERIPLKKMPSVR | EILEER | -21.04  |
| >gi 132329 sp P00796.1 RE | 46  | LKKMPSVREILEER | GVDMTR | -38.916 |
| >gi 132329 sp P00796.1 RE | 52  | VREILEERGVDMTR | LSAEWD | -35.889 |
| >gi 132329 sp P00796.1 RE | 116 | GSANLWVPSTKCSR | LYLACG | -37.627 |
| >gi 132329 sp P00796.1 RE | 150 | ENGDDFTIHYGSGR | VKGFLS | -30.289 |
| >gi 132329 sp P00796.1 RE | 227 | GVLKEKVSFVYYNR | GPHLLG | -29.38  |
| >gi 132329 sp P00796.1 RE | 312 | LKLIMQALGAKEKR | LHEYVV | -23.159 |
| >gi 132329 sp P00796.1 RE | 336 | VPTLPDISFNLGGR | AYTLSS | -37.915 |
| >gi 132329 sp P00796.1 RE | 352 | TLSTDYVLQYPNR  | RDKLCT | -33.166 |
| >gi 132329 sp P00796.1 RE | 353 | LSSTDYVLQYPNRR | DKLCTV | -25.356 |
| >gi 132329 sp P00796.1 RE | 382 | PTGPVWVLGATFIR | KFYTEF | -38.754 |
| >gi 132329 sp P00796.1 RE | 390 | GATFIRKFYTEFDR | HNNRIG | -45.586 |
| >gi 132329 sp P00796.1 RE | 394 | IRKFYTEFDRHNNR | IGFALA | -29.557 |
| >gi 1352125 sp Q02853.2 M | 36  | LLLLLLPSPLMAR  | ARPPES | -27.275 |
| >gi 1352125 sp Q02853.2 M | 38  | LLLLPSPLMARAR  | PPESHR | -27.804 |
| >gi 1352125 sp Q02853.2 M | 44  | SPLMARARPPESHR | HHPVKK | -31.588 |
| >gi 1352125 sp Q02853.2 M | 53  | PESHRHHPVKKGPR | LLHAAL | -18.945 |
| >gi 1352125 sp Q02853.2 M | 80  | PASHWVPSAGSSR  | PLRCGV | -25.195 |
| >gi 1352125 sp Q02853.2 M | 83  | HWVPSAGSSRPLR  | CGVPDL | -1.973  |
| >gi 1352125 sp Q02853.2 M | 96  | RCGVDPDVLNAR   | NRQKRF | -35.123 |
| >gi 1352125 sp Q02853.2 M | 98  | GVPDLPDVLNARNR | QKRFVL | -28.333 |
| >gi 1352125 sp Q02853.2 M | 108 | ARNRQKRFVLSGGR | WEKTDL | -36.763 |
| >gi 1352125 sp Q02853.2 M | 117 | LSGGRWEKTDLYR  | ILRFPW | -41.278 |
| >gi 1352125 sp Q02853.2 M | 120 | GRWEKTDLYRILR  | FPWQLV | -6.027  |
| >gi 1352125 sp Q02853.2 M | 127 | LYRILRFPWQLVR  | EQVRQT | -28.297 |
| >gi 1352125 sp Q02853.2 M | 131 | ILRFPWQLVREQVR | QTVAEA | -22.664 |
| >gi 1352125 sp Q02853.2 M | 156 | EVTPLTFTEVHEGR | ADIMID | -30.294 |
| >gi 1352125 sp Q02853.2 M | 165 | VHEGRADIMIDFAR | YWHGDN | -39.45  |
| >gi 1352125 sp Q02853.2 M | 191 | GGILAHAFPKTHR  | EGDVHF | -9.709  |
| >gi 1352125 sp Q02853.2 M | 244 | TAAKALMSPFYTFR | YPLSLS | -33.795 |
| >gi 1352125 sp Q02853.2 M | 254 | YTFRYPLSLSPDDR | RGIQHL | -42.961 |
| >gi 1352125 sp Q02853.2 M | 255 | TFRYPLSLSPDDRR | GIQHLY | -23.718 |
| >gi 1352125 sp Q02853.2 M | 263 | SPDDRRGIQHLYGR | PQMAPT | -22.112 |
| >gi 1352125 sp Q02853.2 M | 309 | DVCETSFDAVSTIR | GELFFF | -34.812 |
| >gi 1352125 sp Q02853.2 M | 322 | RGELFFFKAGFVWR | LRSGRL | -38.197 |
| >gi 1352125 sp Q02853.2 M | 324 | ELFFFKAGFVWRLR | SGRLQP | -26.717 |
| >gi 1352125 sp Q02853.2 M | 327 | FFKAGFVWRLRSGR | LQPGYP | -15.64  |

|                           |     |                 |        |         |
|---------------------------|-----|-----------------|--------|---------|
| >gi 1352125 sp Q02853.2 M | 338 | SGRLQPGYPALASR  | HWQGLP | -29.684 |
| >gi 1352125 sp Q02853.2 M | 408 | LVWGPEKNKIYFFR  | GGDYWR | -26.45  |
| >gi 1352125 sp Q02853.2 M | 414 | KNKIYFFRGGDYWR  | FHPRTQ | -41.349 |
| >gi 1352125 sp Q02853.2 M | 418 | YFFRGGDYWRFHPR  | TQRVDN | -31.144 |
| >gi 1352125 sp Q02853.2 M | 421 | RGGDYWRFHPRTR   | VDNPVP | -14.698 |
| >gi 1352125 sp Q02853.2 M | 428 | FHPRTQRVDNPVPR  | RSTDWR | -29.955 |
| >gi 1352125 sp Q02853.2 M | 429 | HPRTQRVDNPVPRR  | STDWRG | -7.65   |
| >gi 1352125 sp Q02853.2 M | 434 | RVDNPVPRRSTDWR  | GVPSEI | -25.722 |
| >gi 1352125 sp Q02853.2 M | 455 | AAFQDAEGYAYFLR  | GHLYWK | -35.11  |
| >gi 1352125 sp Q02853.2 M | 475 | FDPVKVKVLEGFPR  | PVGPDP | -30.586 |
| >gi 62906884 sp P24347.2  | 32  | MLLLLLQPPLLAR   | ALPPDV | -21.18  |
| >gi 62906884 sp P24347.2  | 45  | RALPPDVHHLHAER  | RGPQPW | -30.725 |
| >gi 62906884 sp P24347.2  | 46  | ALPPDVHHLHAERR  | GPQPWH | -15.882 |
| >gi 62906884 sp P24347.2  | 70  | SSPAPAPATQEAPR  | PASSLR | -31.027 |
| >gi 62906884 sp P24347.2  | 76  | PATQEAPRPASSLR  | PPRCGV | -25.196 |
| >gi 62906884 sp P24347.2  | 79  | QEAPRPASSLRPPR  | CGVPDP | 4.317   |
| >gi 62906884 sp P24347.2  | 92  | RCGVDPDPSDGLSAR | NRQKRF | -32.439 |
| >gi 62906884 sp P24347.2  | 94  | GVPDPSDGLSARNR  | QKRFVL | -26.053 |
| >gi 62906884 sp P24347.2  | 104 | ARNRQKRFVLSGGR  | WEKTDL | -36.763 |
| >gi 62906884 sp P24347.2  | 113 | LSGGRWEKTDLTYS  | ILRFPW | -41.278 |
| >gi 62906884 sp P24347.2  | 116 | GRWEKTDLTYSRILR | FPWQLV | -6.027  |
| >gi 62906884 sp P24347.2  | 127 | ILRFPWQLVQEQVR  | QTMAEA | -32.67  |
| >gi 62906884 sp P24347.2  | 152 | DVTPLTFTEVHEGR  | ADIMID | -30.275 |
| >gi 62906884 sp P24347.2  | 161 | VHEGRADIMIDFAR  | YWHGDD | -39.45  |
| >gi 62906884 sp P24347.2  | 187 | GGILAHAFPPKTHR  | EGDVHF | -9.709  |
| >gi 62906884 sp P24347.2  | 240 | TAAKALMSAFYTFR  | YPLSLS | -34.452 |
| >gi 62906884 sp P24347.2  | 251 | TFRYPLSLSPDDCR  | GVQHLY | -39.011 |
| >gi 62906884 sp P24347.2  | 267 | QHLYGQPWPTVTSR  | TPALGP | -25.202 |
| >gi 62906884 sp P24347.2  | 305 | DACEASFDVAVSTIR | GELFFF | -34.89  |
| >gi 62906884 sp P24347.2  | 318 | RGELFFFKAGFVWR  | LRGGQL | -38.678 |
| >gi 62906884 sp P24347.2  | 320 | ELFFFKAGFVWRLR  | GGQLQP | -29.031 |
| >gi 62906884 sp P24347.2  | 334 | GGQLQPGYPALASR  | HWQGLP | -30.185 |
| >gi 62906884 sp P24347.2  | 384 | VLGPAPLTELGLVR  | FPVHAA | -34.182 |
| >gi 62906884 sp P24347.2  | 404 | LVWGPEKNKIYFFR  | GRDYWR | -27.651 |
| >gi 62906884 sp P24347.2  | 406 | WGPEKNKIYFFRGR  | DYWRFH | -35.409 |
| >gi 62906884 sp P24347.2  | 410 | KNKIYFFRGRDYWR  | FHPSTR | -32.882 |
| >gi 62906884 sp P24347.2  | 416 | FRGRDYWRFHPSTR  | RVDSPV | -24.797 |
| >gi 62906884 sp P24347.2  | 417 | RGRDYWRFHPSTRR  | VDSPVP | -20.945 |
| >gi 62906884 sp P24347.2  | 424 | FHPSTRRVDSPVPR  | RATDWR | -27.611 |
| >gi 62906884 sp P24347.2  | 425 | HPSTRRVDSPVPRR  | ATDWRG | -6.858  |
| >gi 62906884 sp P24347.2  | 430 | RVDSPVPRRATDWR  | GVPSEI | -26.612 |
| >gi 62906884 sp P24347.2  | 451 | AAFQDADGYAYFLR  | GRLYWK | -31.848 |
| >gi 62906884 sp P24347.2  | 453 | FQDADGYAYFLRGR  | LYWKFD | -37.688 |

|                           |     |                 |         |         |
|---------------------------|-----|-----------------|---------|---------|
| >gi 62906884 sp P24347.2  | 471 | FDPVKVKALEGFPR  | LVGPDF  | -33.839 |
| >gi 139653 sp P04004.1 VT | 27  | AWVALADQESCKGR  | CTEGFN  | -32.066 |
| >gi 139653 sp P04004.1 VT | 64  | CTDYTAECKPQVTR  | GDFVFTM | -18.855 |
| >gi 139653 sp P04004.1 VT | 138 | PEVGASKPEGIDSR  | PETLHP  | -40.642 |
| >gi 139653 sp P04004.1 VT | 146 | EGIDSRPETLHPGR  | PQPPAE  | -15.142 |
| >gi 139653 sp P04004.1 VT | 176 | AFTDLKNGSLFAFR  | GQYCYE  | -32.925 |
| >gi 139653 sp P04004.1 VT | 189 | RGQYCYELDEKAVR  | PGYPKL  | -23.098 |
| >gi 139653 sp P04004.1 VT | 197 | DEKAVRPGYPKLIR  | DVWGIE  | -10.437 |
| >gi 139653 sp P04004.1 VT | 212 | VWVGIEPIDAAFTR  | INCQ GK | -41.47  |
| >gi 139653 sp P04004.1 VT | 229 | QGKTYLFKGSQYWR  | FEDGVL  | -32.837 |
| >gi 139653 sp P04004.1 VT | 241 | WRFEDGVLPDYPR   | NISDGF  | -38.627 |
| >gi 139653 sp P04004.1 VT | 268 | DAALALPAHSYSGR  | ERVYFF  | -26.285 |
| >gi 139653 sp P04004.1 VT | 270 | ALALPAHSYSGRER  | VYFFKG  | -38.303 |
| >gi 139653 sp P04004.1 VT | 310 | SLSAVFEHFAMMQR  | DSWEDI  | -28.865 |
| >gi 139653 sp P04004.1 VT | 324 | DSWEDIFELLFWGR  | TSAGTR  | -34.762 |
| >gi 139653 sp P04004.1 VT | 330 | FELLFWGRTSAGTR  | QPQFIS  | -27.196 |
| >gi 139653 sp P04004.1 VT | 337 | RTSAGTRQPQFISR  | DWHGVP  | -28.575 |
| >gi 139653 sp P04004.1 VT | 353 | HGVPGQVDAAMAGR  | IYISGM  | -39.154 |
| >gi 139653 sp P04004.1 VT | 362 | AMAGRIYISGMAPR  | PSLAKK  | -26.219 |
| >gi 139653 sp P04004.1 VT | 370 | SGMAPRPSLAKKQR  | FRHRNR  | -5.149  |
| >gi 139653 sp P04004.1 VT | 372 | MAPRPSLAKKQRFR  | HRNRKG  | -20.191 |
| >gi 139653 sp P04004.1 VT | 374 | PRPSLAKKQFRHR   | NRKGYR  | -20.923 |
| >gi 139653 sp P04004.1 VT | 376 | PSLAKKQFRHRNR   | KGYRSQ  | -23.586 |
| >gi 139653 sp P04004.1 VT | 380 | KKQRFRHRNRKGYR  | SQRGHS  | -0.835  |
| >gi 139653 sp P04004.1 VT | 383 | RFRHRNRKGYRSQR  | GHSRGR  | -4.208  |
| >gi 139653 sp P04004.1 VT | 387 | RNRKGYRSQRGHSR  | GRNQNS  | -21.188 |
| >gi 139653 sp P04004.1 VT | 389 | RKGYRSQRGHSRGR  | NQNSRR  | -23.936 |
| >gi 139653 sp P04004.1 VT | 394 | SQRGHSRGRNQNSR  | RPSRAT  | -18.734 |
| >gi 139653 sp P04004.1 VT | 395 | QRGHSRGRNQNSRR  | PSRATW  | -18.856 |
| >gi 139653 sp P04004.1 VT | 421 | EESNLGANNYDDYR  | MDWLVP  | -53.434 |
| >gi 139653 sp P04004.1 VT | 446 | IQSVFFFSGDKYYR  | VNLRTR  | -38.406 |
| >gi 139653 sp P04004.1 VT | 450 | FFFSGDKYYRVNLR  | TRRVDT  | -8.929  |
| >gi 139653 sp P04004.1 VT | 452 | FSGDKYYRVNLRTR  | RVDTV D | -25.165 |
| >gi 139653 sp P04004.1 VT | 453 | SGDKYYRVNLRTRR  | VDTVDP  | -10.191 |
| >gi 139653 sp P04004.1 VT | 463 | RTRRVDTVDPYPR   | SIAQYW  | -29.2   |
| >gi 46397079 sp P60852.1  | 26  | VALLLVATLGLGR   | WLQPDP  | -33.041 |
| >gi 46397079 sp P60852.1  | 38  | GRWLQPDPLPGLR   | HSYDCG  | -26.178 |
| >gi 46397079 sp P60852.1  | 55  | DCGIKGMQLLVFPR  | PGQTLR  | -22.694 |
| >gi 46397079 sp P60852.1  | 61  | MQLLVFPRPGQTLR  | FKVVDE  | -20.478 |
| >gi 46397079 sp P60852.1  | 71  | QTLRFKVVDEFNGR  | FDVNNC  | -43.649 |
| >gi 46397079 sp P60852.1  | 87  | VNNCSICYHWVTSR  | PQEP AV | -27.109 |
| >gi 46397079 sp P60852.1  | 99  | SRPQEP AVFSADYR | GCHVLE  | -40.517 |
| >gi 46397079 sp P60852.1  | 109 | ADYRGCHVLEKDGR  | FHLRVF  | -33.344 |

|                           |     |                 |        |         |
|---------------------------|-----|-----------------|--------|---------|
| >gi 46397079 sp P60852.1  | 113 | GCHVLEKDGRFHRLR | VFMEAV | -27.966 |
| >gi 46397079 sp P60852.1  | 124 | HLRVFMEAVLPNGR  | VDVAQD | -36.778 |
| >gi 46397079 sp P60852.1  | 142 | QDATLICPKPDPSR  | TLDSQL | -29.179 |
| >gi 46397079 sp P60852.1  | 224 | PHWGTLEHWDVNR   | DYIGTH | -30.722 |
| >gi 46397079 sp P60852.1  | 248 | QCQVASGHLPCIVR  | RTSKEA | -28.264 |
| >gi 46397079 sp P60852.1  | 249 | CQVASGHLPCIVRR  | TSKEAC | -20.078 |
| >gi 46397079 sp P60852.1  | 266 | EACQQAGCCYDNTR  | EVPCYY | -42.061 |
| >gi 46397079 sp P60852.1  | 282 | PCYYGNTATVQCFR  | DGYFVL | -35.169 |
| >gi 46397079 sp P60852.1  | 299 | FVLVVSQEMALTHR  | ITLANI | -33.414 |
| >gi 46397079 sp P60852.1  | 366 | GIHIQKGPQGSITR  | DSTFQL | -24.87  |
| >gi 46397079 sp P60852.1  | 375 | GSITRDSTFQLHVR  | CVFNAS | -30.349 |
| >gi 46397079 sp P60852.1  | 406 | PPSPAPMTQPGPLR  | LELRIA | -37.152 |
| >gi 46397079 sp P60852.1  | 410 | APMTQPGPLRLELR  | IAKDET | -24.796 |
| >gi 46397079 sp P60852.1  | 430 | FSSYYGEDDYPIVR  | LLREPV | -43.457 |
| >gi 46397079 sp P60852.1  | 433 | YYGEDDYPIVRLLR  | EPVHVE | 0.011   |
| >gi 46397079 sp P60852.1  | 441 | IVRLLREPVHVEVR  | LLQRTD | -25.882 |
| >gi 46397079 sp P60852.1  | 445 | LREPVHVEVRLLQR  | TDPNLV | -16.168 |
| >gi 46397079 sp P60852.1  | 486 | ILSDGCPFKGDSYR  | TQMVAL | -36.003 |
| >gi 46397079 sp P60852.1  | 504 | ALDGATPFQSHYQR  | FTVATF | -12.656 |
| >gi 46397079 sp P60852.1  | 519 | TVATFALLDSGSQR  | ALRGLV | -28.695 |
| >gi 46397079 sp P60852.1  | 522 | TFALLDSGSQRALR  | GLVYLF | -1.7    |
| >gi 46397079 sp P60852.1  | 552 | LETCTACSTGTTR   | QRRSSG | -28.067 |
| >gi 46397079 sp P60852.1  | 554 | TCSTACSTGTTRQR  | RSSGHR | -24.133 |
| >gi 46397079 sp P60852.1  | 560 | STGTTRQRRSSGHR  | NDTARP | -20.987 |
| >gi 46397079 sp P60852.1  | 565 | RQRRSSGHRNDTAR  | PQDIVS | -23.855 |
| >gi 46397079 sp P60852.1  | 600 | TLGPTDSNGNSSLR  | PLLWAV | -27.296 |
| >gi 46397079 sp P60852.1  | 637 | LSQTWAQKLWESNR  | Q----  | -39.549 |
| >gi 466206 sp Q05996.1 ZP | 24  | SPSGWFNAGWSTYR  | SISLFF | -32.565 |
| >gi 466206 sp Q05996.1 ZP | 58  | VNPAFPGTVTCDER  | EITVEF | -42.802 |
| >gi 466206 sp Q05996.1 ZP | 100 | NCTYILDPEKLTLLR | ATYDNC | -12.831 |
| >gi 466206 sp Q05996.1 ZP | 108 | EKLTLRATYDNCTR  | RVHGGH | -39.976 |
| >gi 466206 sp Q05996.1 ZP | 109 | KLTLRATYDNCTRR  | VHGGHQ | -32.268 |
| >gi 466206 sp Q05996.1 ZP | 119 | CTRRVHGGHQMTIR  | VMNNSA | -34.203 |
| >gi 466206 sp Q05996.1 ZP | 128 | QMTIRVMNNSAALR  | HGAVMY | -29.657 |
| >gi 466206 sp Q05996.1 ZP | 166 | TICQKDFMSFSLPR  | VFSGLA | -34.941 |
| >gi 466206 sp Q05996.1 ZP | 193 | VQMGWSIEVGDGAR  | AKTLTL | -31.083 |
| >gi 466206 sp Q05996.1 ZP | 215 | AMKEGFSLIDNHR   | MTFHVP | -31.861 |
| >gi 466206 sp Q05996.1 ZP | 346 | QFYLASLKLTFLLR  | PETVSM | -35.339 |
| >gi 466206 sp Q05996.1 ZP | 397 | SYQTQPALDLGTLR  | VGNSSC | -38.185 |
| >gi 466206 sp Q05996.1 ZP | 416 | CQPVFEAQSQGLVR  | FHIPLN | -33.395 |
| >gi 466206 sp Q05996.1 ZP | 427 | LVRFHIPLNGCGTR  | YKFEDD | -32.981 |
| >gi 466206 sp Q05996.1 ZP | 455 | HALWTDFFPPSKISR | DSEFRM | -2.6    |
| >gi 466206 sp Q05996.1 ZP | 460 | DFPPSKISRDESEFR | MTVKCS | -33.481 |

|                           |     |                 |        |         |
|---------------------------|-----|-----------------|--------|---------|
| >gi 466206 sp Q05996.1 ZP | 469 | DSEFRMTVKCSYSR  | NDMLLN | -33.745 |
| >gi 466206 sp Q05996.1 ZP | 518 | YQQPYGENEYPLVR  | FLRQPI | -36.664 |
| >gi 466206 sp Q05996.1 ZP | 521 | PYGENEYPLVRFLR  | QPIYME | -2.513  |
| >gi 466206 sp Q05996.1 ZP | 529 | LVRFLRQPIYMEVR  | VLNRDD | -37.967 |
| >gi 466206 sp Q05996.1 ZP | 533 | LRQPIYMEVRVLNR  | DDPNIK | -4.986  |
| >gi 466206 sp Q05996.1 ZP | 592 | PVGSSVTHPDHYQR  | FDMKAF | -19.381 |
| >gi 466206 sp Q05996.1 ZP | 622 | SLVYFHCSALICNR  | LSPDSP | -32.328 |
| >gi 466206 sp Q05996.1 ZP | 639 | DSPLCSVTCPVSSR  | HRRATG | -30.602 |
| >gi 466206 sp Q05996.1 ZP | 641 | PLCSVTCPVSSRHR  | RATGAT | -22.802 |
| >gi 466206 sp Q05996.1 ZP | 670 | PGPILLSDSSFR    | GVGSSD | -43.25  |
| >gi 466206 sp Q05996.1 ZP | 688 | SDLKASGSSGEKSR  | SETGEE | -29.742 |
| >gi 466206 sp Q05996.1 ZP | 698 | EKSRETGEEVGSR   | GAMDTK | -32.036 |
| >gi 466206 sp Q05996.1 ZP | 740 | VATLGFIIYYLYEKR | TVSNH- | -25.667 |
| >gi 141724 sp P21754.1 ZP | 67  | MVSKDLFGTGKLR   | AADLTL | -7.148  |
| >gi 141724 sp P21754.1 ZP | 91  | CEPLVSMDETVVVR  | FEVGLH | -42.909 |
| >gi 141724 sp P21754.1 ZP | 121 | DALVYSTFLLHDPR  | PVGNLS | -26.025 |
| >gi 141724 sp P21754.1 ZP | 130 | LHDPRPVGNLSIVR  | TNRAEI | -35.228 |
| >gi 141724 sp P21754.1 ZP | 133 | PRPVGNLSIVRTNR  | AEIPIE | -21.729 |
| >gi 141724 sp P21754.1 ZP | 141 | IVRTNRAEPIECR   | YPRQGN | -33.526 |
| >gi 141724 sp P21754.1 ZP | 144 | TNRAEPIECRYPR   | QGNVSS | -25.91  |
| >gi 141724 sp P21754.1 ZP | 161 | VSSQAILPTWLPFR  | TTVFSE | -38.003 |
| >gi 141724 sp P21754.1 ZP | 175 | TTVFSEEKLTFLSR  | LMEENW | -36.409 |
| >gi 141724 sp P21754.1 ZP | 186 | SLRLMEENWNAEKR  | SPTFHL | -21.597 |
| >gi 141724 sp P21754.1 ZP | 211 | LQAEIHTGSHVPLR  | LFVDHC | -28.278 |
| >gi 141724 sp P21754.1 ZP | 255 | DGLTDASSAFKVPR  | PGPDTL | -10.389 |
| >gi 141724 sp P21754.1 ZP | 275 | QFTVDVFHFANDSR  | NMIYIT | -41.891 |
| >gi 141724 sp P21754.1 ZP | 334 | CCNKGDCGTPSHSR  | RQPHVM | -29.505 |
| >gi 141724 sp P21754.1 ZP | 335 | CNKGDCGTPSHSRR  | QPHVMS | 6.895   |
| >gi 141724 sp P21754.1 ZP | 345 | HSRRQPHVMSQWSR  | SASRNR | -22.368 |
| >gi 141724 sp P21754.1 ZP | 349 | QPHVMSQWSRSASR  | NRRHVT | -22.896 |
| >gi 141724 sp P21754.1 ZP | 351 | HVMSQWSRSASRNR  | RHVTEE | -28.252 |
| >gi 141724 sp P21754.1 ZP | 370 | EADVTVGPLIFLDR  | RGDHEV | -38.084 |
| >gi 141724 sp P21754.1 ZP | 371 | ADVTVGPLIFLDRR  | GDHEVE | -31.242 |
| >gi 141724 sp P21754.1 ZP | 411 | VSLTLTAVILVLTR  | RCRTAS | -31.717 |
| >gi 141724 sp P21754.1 ZP | 412 | SLTLTAVILVLTRR  | CRTASH | -18.667 |
| >gi 141724 sp P21754.1 ZP | 414 | TLTAVILVLTRRCR  | TASHPV | -20.617 |
| >gi 112849 sp P12961.1 7B | 30  | LMFEWNPAFAYSPR  | TPDRVS | -31.898 |
| >gi 112849 sp P12961.1 7B | 34  | WNPAFAYSPRTPDR  | VSETDI | -30.933 |
| >gi 112849 sp P12961.1 7B | 42  | PRTPDRVSETDIQR  | LLHGVM | -44.08  |
| >gi 112849 sp P12961.1 7B | 55  | RLLHGVMQLGIAR   | PRVEYP | -32.344 |
| >gi 112849 sp P12961.1 7B | 57  | LHGVMQLGIARPR   | VEYPAH | -34.93  |
| >gi 112849 sp P12961.1 7B | 142 | GLENAPDTAEFSR   | EFQLDQ | -32.305 |
| >gi 112849 sp P12961.1 7B | 177 | NKKLLYEKMKGQQR  | RKRRSV | -26.808 |

|                           |     |                |        |         |
|---------------------------|-----|----------------|--------|---------|
| >gi 112849 sp P12961.1 7B | 178 | KKLLYEKMKGGQRR | KRRSVN | -18.93  |
| >gi 112849 sp P12961.1 7B | 180 | LLYEKMKGGQRRKR | RSVNPY | 11.983  |
| >gi 112849 sp P12961.1 7B | 191 | RKRRSVNPYLQGKR | LDNVVA | -25.057 |
| >gi 69053 pir  NGMSMG ner | 27  | VGHGQHGGVLACGR | AVQGAG | -30.959 |
| >gi 69053 pir  NGMSMG ner | 60  | NKGFAKDAAFYTGR | SEVHSV | -30.262 |
| >gi 69053 pir  NGMSMG ner | 115 | HWTKLQHSLDTALR | RARSAP | -34.084 |
| >gi 69053 pir  NGMSMG ner | 116 | WTKLQHSLDTALRR | ARSAPT | -22.442 |
| >gi 69053 pir  NGMSMG ner | 118 | KLQHSLDTALRRAR | SAPTAP | 12.182  |
| >gi 69053 pir  NGMSMG ner | 128 | RRARSAPTAPIAAR | VTGQTR | -22.9   |
| >gi 69053 pir  NGMSMG ner | 134 | PTAPIAARVTGQTR | NITVDP | -27.693 |
| >gi 69053 pir  NGMSMG ner | 141 | RVTGQTRNITVDPR | LFKKRR | -38.495 |
| >gi 69053 pir  NGMSMG ner | 146 | TRNITVDPRLFKKR | RLHSPR | -11.053 |
| >gi 69053 pir  NGMSMG ner | 147 | RNITVDPRLFKKRR | LHSPRV | -20.184 |
| >gi 69053 pir  NGMSMG ner | 152 | DPRLFKKRRLHSPR | VLFSTQ | -17.399 |
| >gi 69053 pir  NGMSMG ner | 181 | DLDFQAHGTIPFNR | THRSKR | -39.005 |
| >gi 69053 pir  NGMSMG ner | 184 | FQAHGTIPFNRTHR | SKRSST | -0.651  |
| >gi 69053 pir  NGMSMG ner | 237 | TVLAEVNINNSVFR | QYFFET | -41.343 |
| >gi 69053 pir  NGMSMG ner | 246 | NSVFRQYFFETKCR | ASNPVE | -35.433 |
| >gi 69053 pir  NGMSMG ner | 256 | TKCRASNPVESGCR | GIDSKH | -37.604 |
| >gi 69053 pir  NGMSMG ner | 287 | VKALTTDEKQAAWR | FIRIDT | -25.937 |
| >gi 69053 pir  NGMSMG ner | 290 | LTTDEKQAAWRFIR | IDTACV | -28.679 |
| >gi 69053 pir  NGMSMG ner | 301 | FIRIDTACVCVLSR | KATRRG | -32.467 |
| >gi 69053 pir  NGMSMG ner | 305 | DTACVCVLSRKATR | RG---- | 0.021   |
| >gi 69053 pir  NGMSMG ner | 306 | TACVCVLSRKATRR | G----- | -23.969 |
| >gi 14717127 emb CAC44179 | 43  | TGKKKVVAEIQGGR | RSAQSN | -32.006 |
| >gi 14717127 emb CAC44179 | 44  | GKKKVVAEIQGGRR | SAQSNE | -20.648 |
| >gi 14717127 emb CAC44179 | 53  | QGGRRSAQSNELLR | DFEVTL | -30.521 |
| >gi 14717127 emb CAC44179 | 66  | RDFEVTLLQMFGLR | KRPQPS | -33.249 |
| >gi 14717127 emb CAC44179 | 68  | FEVTLLQMFGLRKR | PQPSKD | -22.567 |
| >gi 14717127 emb CAC44179 | 82  | PQPSKDVVVPAYMR | DLYRLQ | -31.314 |
| >gi 14717127 emb CAC44179 | 86  | KDVVVPAYMRDLYR | LQSAEE | -36.598 |
| >gi 14717127 emb CAC44179 | 106 | EDELHDISMEYPER | PTSRAN | -45.02  |
| >gi 14717127 emb CAC44179 | 110 | HDISMEYPERPTSR | ANTVRS | -22.084 |
| >gi 14717127 emb CAC44179 | 115 | EYPERPTSRANTVR | SFHHEE | -17.765 |
| >gi 14717127 emb CAC44179 | 136 | LENLPSTAENGNFR | FVFNLS | -38.007 |
| >gi 14717127 emb CAC44179 | 156 | SIPENEVISSAELR | LYREQI | -38.86  |
| >gi 14717127 emb CAC44179 | 159 | ENEVISSAELRLYR | EQIDHG | -11.489 |
| >gi 14717127 emb CAC44179 | 174 | QIDHGPAWEEGFHR | INIYEV | -46.547 |
| >gi 14717127 emb CAC44179 | 193 | VMKPITASGHMISR | LLDTRL | -28.593 |
| >gi 14717127 emb CAC44179 | 198 | TASGHMISRLLDTR | LIHHNV | -32.85  |
| >gi 14717127 emb CAC44179 | 218 | TQWESFDVSPAIR  | WTRDKQ | -35.101 |
| >gi 14717127 emb CAC44179 | 221 | ESFDVSPAIRWTR  | DKQINH | -8.939  |
| >gi 14717127 emb CAC44179 | 248 | HLNQTKTYQGKHVR | ISRSLL | -23.286 |



|                           |     |                 |        |         |
|---------------------------|-----|-----------------|--------|---------|
| >gi 14717127 emb CAC44179 | 265 | SLLPQEDADWSQMR  | PLLITF | -44.976 |
| >gi 14717127 emb CAC44179 | 276 | QMRPLLITFSHDGR  | GHALTR | -35.203 |
| >gi 14717127 emb CAC44179 | 282 | ITFSHDGRGHALTR  | RSKRSP | -22.635 |
| >gi 14717127 emb CAC44179 | 283 | TFSHDGRGHALTRR  | SKRSPK | 4.954   |
| >gi 14717127 emb CAC44179 | 292 | ALTRRSKRSPKQQR  | PRKKNK | -19.349 |
| >gi 14717127 emb CAC44179 | 294 | TRRSKRSPKQQRPR  | KKNKHC | -21.663 |
| >gi 14717127 emb CAC44179 | 301 | PKQQRPRKKNKHCR  | RHSLYV | -26.065 |
| >gi 14717127 emb CAC44179 | 302 | KQQRPRKKNKHCR   | HSLYVD | -15.598 |
| >gi 119610 sp P05305.1 ED | 46  | ENGGEKTPSPPPWR  | LRRSKR | -36.772 |
| >gi 119610 sp P05305.1 ED | 48  | GGEKTPSPPPWRLR  | RSKRCS | -23.099 |
| >gi 119610 sp P05305.1 ED | 49  | GEKTPSPPPWRLRR  | SKRCSC | -5.378  |
| >gi 119610 sp P05305.1 ED | 89  | TPEHVVPYGLGSPR  | SKRALE | -20.647 |
| >gi 119610 sp P05305.1 ED | 105 | RALENLLPTKATDR  | ENRCQC | -26.913 |
| >gi 119610 sp P05305.1 ED | 130 | KKCWNFQAGKELR   | AEDIME | -21.358 |
| >gi 119610 sp P05305.1 ED | 162 | SKLGKKCIYQQLVR  | GRKIRR | -28.054 |
| >gi 119610 sp P05305.1 ED | 164 | LGKKCIYQQLVRGR  | KIRRSS | -26.836 |
| >gi 119610 sp P05305.1 ED | 167 | KCIYQQLVRGRKIR  | RSSEEH | 5.831   |
| >gi 119610 sp P05305.1 ED | 175 | RGRKIRRSSEHLR   | QTRSET | -33.932 |
| >gi 119610 sp P05305.1 ED | 178 | KIRRSSEHLRQTR   | SETMRN | 4.068   |
| >gi 119610 sp P05305.1 ED | 183 | SEEHLRQTRSETMR  | NSVKSS | -22.676 |
| >gi 119610 sp P05305.1 ED | 201 | SSFHDPKLGKPSR   | ERYVTH | -0.276  |
| >gi 119610 sp P05305.1 ED | 203 | FHDPKLGKPSRER   | YVTHNR | -25.504 |
| >gi 119610 sp P05305.1 ED | 209 | KGKPSRERYVTHNR  | AHW--- | -34.404 |
| >gi 3639041 gb AAC36302.1 | 33  | RGSQCGCGGAPAR   | AGEGNS | -23.71  |
| >gi 3639041 gb AAC36302.1 | 65  | ALHLLTLCYLELR   | SELRRE | -41.23  |
| >gi 3639041 gb AAC36302.1 | 69  | LTLCCYLELRSELR  | REGAE  | -28.45  |
| >gi 3639041 gb AAC36302.1 | 70  | TLCCYLELRSELRR  | ERGAES | -14.094 |
| >gi 3639041 gb AAC36302.1 | 72  | CCYLELRSELRRER  | GAESRL | -9.186  |
| >gi 3639041 gb AAC36302.1 | 77  | LRSELRRERGAESR  | LGGSGT | -27.566 |
| >gi 3639041 gb AAC36302.1 | 152 | FFDEKPYSEEEESR  | RVRRNK | -36.399 |
| >gi 3639041 gb AAC36302.1 | 153 | FPDEKPYSEEEESRR | VRRNKR | -34.515 |
| >gi 3639041 gb AAC36302.1 | 155 | DEKPYSEEEESRRVR | RNKRSK | -6.518  |
| >gi 3639041 gb AAC36302.1 | 244 | LQGPSGAADKAGTR  | ENQPAV | -29.031 |
| >gi 3639041 gb AAC36302.1 | 276 | KNDLSGGVLNDWSR  | ITMNP  | -40.234 |
| >gi 3639041 gb AAC36302.1 | 289 | RITMNPVKVFLHPR  | SGELEV | -10.878 |
| >gi 3639041 gb AAC36302.1 | 334 | EVVVDEKPFLQCTR  | SIETGK | -28.491 |
| >gi 3639041 gb AAC36302.1 | 357 | NTCYTAGVCLLKAR  | QKIAVK | -32.557 |
| >gi 3639041 gb AAC36302.1 | 384 | INMSKHTTFFGAIR  | LGEAPA | -36.196 |
| >gi 134522 sp P16043.1 SL | 27  | SGSHCSLPPSPFFR  | MQRHVD | -32.06  |
| >gi 134522 sp P16043.1 SL | 41  | MQRHVDAIFTTNYR  | KLLSQL | -42.43  |
| >gi 134522 sp P16043.1 SL | 50  | TTNYRKLLSQLYAR  | KVIQDI | -32.149 |
| >gi 134522 sp P16043.1 SL | 63  | RKVIQDIMNKQGER  | IQEQRA | -34.776 |
| >gi 134522 sp P16043.1 SL | 68  | DIMNKQGERIQEQR  | ARLSRQ | -18.227 |

|                           |     |                |        |         |
|---------------------------|-----|----------------|--------|---------|
| >gi 134522 sp P16043.1 SL | 70  | MNKQGERIQEQRAR | LSRQED | -30.866 |
| >gi 134522 sp P16043.1 SL | 73  | QGERIQEQRARLSR | QEDSMW | 3.186   |
| >gi 134522 sp P16043.1 SL | 96  | KQMTLESILQGFPR | MKPSAD | -29.023 |
| >gi 11024682 ref NP_00060 | 69  | AELVDALQFVCGDR | GFYFNK | -43.945 |
| >gi 11024682 ref NP_00060 | 84  | FYFNKPTGYGSSSR | RAPQTG | -27.658 |
| >gi 11024682 ref NP_00060 | 85  | YFNKPTGYGSSRR  | APQTGI | -12.244 |
| >gi 11024682 ref NP_00060 | 98  | RAPQTGIVDECCFR | SCDLRR | -50.773 |
| >gi 11024682 ref NP_00060 | 103 | GIVDECCFRSCDLR | RLEMYC | -25.958 |
| >gi 11024682 ref NP_00060 | 104 | IVDECCFRSCDLRR | LEMYCA | -34.698 |
| >gi 11024682 ref NP_00060 | 122 | CAPLKPAKSARSVR | AQRHTD | 7.08    |
| >gi 11024682 ref NP_00060 | 143 | PKTQKEVHLKNASR | GSAGNK | -19.622 |
| >gi 11024682 ref NP_00060 | 152 | KNASRGSAKNKYR  | M----  | -37.62  |
| >gi 108796063 ref NP_0010 | 27  | TFLAFASCCIAAYR | PSETLC | -40.888 |
| >gi 108796063 ref NP_0010 | 48  | GELVDTLQFVCGDR | GFYFSR | -43.823 |
| >gi 108796063 ref NP_0010 | 54  | LQFVCGDRGFYFSR | PASRVS | -28.944 |
| >gi 108796063 ref NP_0010 | 58  | CGDRGFYFSRPASR | VSRRSR | -24.162 |
| >gi 108796063 ref NP_0010 | 61  | RGYFSRPASRVSR  | RSRGIV | 1.13    |
| >gi 108796063 ref NP_0010 | 62  | GFYFSRPASRVSR  | SRGIVE | 12.287  |
| >gi 108796063 ref NP_0010 | 64  | YFSRPASRVSR    | GIVEEC | 2.281   |
| >gi 108796063 ref NP_0010 | 73  | SRRSRGIVECCFR  | SCDLAL | -50.802 |
| >gi 108796063 ref NP_0010 | 92  | LLETYCATPAKSER | DVSTPP | -18.341 |
| >gi 108796063 ref NP_0010 | 107 | VSTPPTVLPDNFPR | YPVGKF | -34.486 |
| >gi 108796063 ref NP_0010 | 125 | KFFQYDTWKQSTQR | LRRGLP | -30.151 |
| >gi 108796063 ref NP_0010 | 127 | FQYDTWKQSTQRLR | RGLPAL | -24.85  |
| >gi 108796063 ref NP_0010 | 135 | STQRLRRGLPALLR | ARRGHV | -25.61  |
| >gi 108796063 ref NP_0010 | 137 | QRLRRGLPALLRAR | RGHVLA | -25.908 |
| >gi 108796063 ref NP_0010 | 138 | RLRRGLPALLRARR | GHVLAK | 4.548   |
| >gi 108796063 ref NP_0010 | 150 | RRGHVLAKELEAFR | EAKRHR | -40.9   |
| >gi 108796063 ref NP_0010 | 154 | VLAKELEAFREAKR | HRPLIA | -21.994 |
| >gi 108796063 ref NP_0010 | 156 | AKELEAFREAKRHR | PLIALP | -11.889 |
| >gi 108796063 ref NP_0010 | 179 | PAHGGAPPEMASNR | K----  | -39.264 |
| >gi 113838 sp P13205.3 AN | 49  | PEQSTMQKLELIR  | EKSEEM | -32.281 |
| >gi 113838 sp P13205.3 AN | 58  | LELIREKSEEMAQR | QLSKDQ | -37.512 |
| >gi 113838 sp P13205.3 AN | 73  | LSKDQGPTKELLKR | VLRSQD | -20.651 |
| >gi 113838 sp P13205.3 AN | 83  | LLKRVLRSQDSAFR | IQERLR | -44.542 |
| >gi 113838 sp P13205.3 AN | 87  | VLRSQDSAFRIQER | LRNSKM | -29.852 |
| >gi 113838 sp P13205.3 AN | 89  | RSQDSAFRIQERLR | NSKMAH | -34.842 |
| >gi 113838 sp P13205.3 AN | 106 | MAHSSSCFGQKIDR | IGAVSR | -33.535 |
| >gi 113838 sp P13205.3 AN | 112 | CFGQKIDRIGAVSR | LGCDGL | -33.461 |
| >gi 113838 sp P13205.3 AN | 119 | RIGAVSRLGCDGLR | LF---- | -41.553 |
| >gi 13249346 ref NP_07772 | 33  | PSEAKPGAPPKVPR | TPPAEE | -9.397  |
| >gi 13249346 ref NP_07772 | 68  | KAPGGGANLKGDR  | SRLLRD | -28.409 |
| >gi 13249346 ref NP_07772 | 70  | PGGGGANLKGDRSR | LLRDLR | -28.866 |

|                           |     |                  |         |         |
|---------------------------|-----|------------------|---------|---------|
| >gi 13249346 ref NP_07772 | 76  | NLKGDRSRLLRDLR   | VDTKSR  | -23.059 |
| >gi 13249346 ref NP_07772 | 82  | SRLLRDLRVDTKSR   | AAWARL  | -29.77  |
| >gi 13249346 ref NP_07772 | 87  | DLRVDTKSRAAWAR   | LLQEHP  | -24.749 |
| >gi 13249346 ref NP_07772 | 96  | AAWARLLQEHPNAR   | KYKGAN  | -36.627 |
| >gi 13249346 ref NP_07772 | 117 | KGLSKGCFGLKLDLDR | IGSMMSG | -31.726 |
| >gi 129719 sp P04085.1 PD | 27  | YLAHVLAEEAEIPR   | EVIERL  | -33.226 |
| >gi 129719 sp P04085.1 PD | 32  | LAEAEIPREVIER    | LARSQI  | -30.424 |
| >gi 129719 sp P04085.1 PD | 35  | EAEIPREVIERLAR   | SQIHSI  | -7.079  |
| >gi 129719 sp P04085.1 PD | 42  | VIERLARSQIHSIR   | DLQRLL  | -11.584 |
| >gi 129719 sp P04085.1 PD | 46  | LARSQIHSIRDQLR   | LLEIDS  | -32.188 |
| >gi 129719 sp P04085.1 PD | 64  | DSVGSSESLDTSLR   | AHGVHA  | -35.986 |
| >gi 129719 sp P04085.1 PD | 78  | AHGVHATKHVPEKR   | PLPIRR  | -17.129 |
| >gi 129719 sp P04085.1 PD | 83  | ATKHVPEKRPLPIR   | RKRSIE  | -10.11  |
| >gi 129719 sp P04085.1 PD | 84  | TKHVPEKRPLPIRR   | KRSIEE  | -19.152 |
| >gi 129719 sp P04085.1 PD | 99  | RSIEEAVPAVCKTR   | TVIYEI  | -29.968 |
| >gi 129719 sp P04085.1 PD | 107 | AVCKTRTVIYEIPR   | SQVDPT  | -38.137 |
| >gi 129719 sp P04085.1 PD | 128 | ANFLIWPPCVEVKR   | CTGCCN  | -26.957 |
| >gi 129719 sp P04085.1 PD | 144 | GCCNTSSVKCQPSR   | VHHRSV  | -31.482 |
| >gi 129719 sp P04085.1 PD | 148 | TSSVKCQPSRVHHR   | SVKVAK  | 8.652   |
| >gi 129719 sp P04085.1 PD | 159 | HHRSVKVAKVEYVR   | KKPKLK  | -31.979 |
| >gi 129719 sp P04085.1 PD | 170 | YVRKKPKLKEVQVR   | LEEHL   | -30.155 |
| >gi 129719 sp P04085.1 PD | 189 | ECACATTSLNPDYR   | EEDTGR  | -40.479 |
| >gi 129719 sp P04085.1 PD | 195 | TSLNPDYREEDTGR   | PRESGK  | -47.072 |
| >gi 129719 sp P04085.1 PD | 197 | LNPDYREEDTGRPR   | ESGKKR  | -26.597 |
| >gi 129719 sp P04085.1 PD | 203 | EEDTGRPRESGKKR   | KRKRLK  | -27.649 |
| >gi 129719 sp P04085.1 PD | 205 | DTGRPRESGKKRKR   | KRLKPT  | -12.72  |
| >gi 129719 sp P04085.1 PD | 207 | GRPRESGKKRKRKR   | LKPT--  | -9.128  |
| >gi 129724 sp P01127.1 PD | 39  | PEELYEMLSDHSIR   | SFDDLQ  | -18.728 |
| >gi 129724 sp P01127.1 PD | 46  | LSDHSIRSFDDLQR   | LLHGDP  | -46.552 |
| >gi 129724 sp P01127.1 PD | 66  | GEEDGAELDLNMTR   | SHSGGE  | -38.166 |
| >gi 129724 sp P01127.1 PD | 78  | TRSHSGGELESLAR   | GRRSLG  | -31.065 |
| >gi 129724 sp P01127.1 PD | 80  | SHSGGELESLARGR   | RSLGSL  | -26.38  |
| >gi 129724 sp P01127.1 PD | 100 | TIAEPAMIAECKTR   | TEVFEI  | -42.4   |
| >gi 129724 sp P01127.1 PD | 108 | AECKTRTEVFEISR   | RLIDRT  | -33.897 |
| >gi 129724 sp P01127.1 PD | 109 | ECKTRTEVFEISRR   | LIDRTN  | -20.633 |
| >gi 129724 sp P01127.1 PD | 113 | RTEVFEISRRLLDR   | TNANFL  | -28.437 |
| >gi 129724 sp P01127.1 PD | 129 | ANFLVWPPCVEVQR   | CSGCCN  | -36.965 |
| >gi 129724 sp P01127.1 PD | 137 | CVEVQRCSGCCNNR   | NVQCRP  | -34.441 |
| >gi 129724 sp P01127.1 PD | 142 | RCSGCCNNRNVQCR   | PTQVQL  | -20.28  |
| >gi 129724 sp P01127.1 PD | 149 | NRNVQCRPTQVQLR   | PVQVRK  | -20.43  |
| >gi 129724 sp P01127.1 PD | 154 | CRPTQVQLRPVQVR   | KIEIVR  | -19.074 |
| >gi 129724 sp P01127.1 PD | 160 | QLRPVQVRKIEIVR   | KKPIFK  | -31.133 |
| >gi 129724 sp P01127.1 PD | 187 | DHLACKCETVAAAR   | PVTRSP  | -24.668 |

|                           |     |                  |         |         |
|---------------------------|-----|------------------|---------|---------|
| >gi 129724 sp P01127.1 PD | 191 | CKCETVAAARPVTR   | SPGGSQ  | -14.514 |
| >gi 129724 sp P01127.1 PD | 200 | RPVTRSPGGSQEQR   | AKTPQT  | -20.545 |
| >gi 129724 sp P01127.1 PD | 207 | GGSQEQRAKTPQTR   | VTIRTV  | -25.908 |
| >gi 129724 sp P01127.1 PD | 211 | EQRAKTPQTRVTIR   | TVRVRR  | -3.797  |
| >gi 129724 sp P01127.1 PD | 214 | AKTPQTRVTIRTVR   | VRRPPK  | -17.916 |
| >gi 129724 sp P01127.1 PD | 216 | TPQTRVTIRTVRVR   | RPPKGK  | -5.564  |
| >gi 129724 sp P01127.1 PD | 217 | PQTRVTIRTVRVRR   | PPKGKH  | 10.476  |
| >gi 129724 sp P01127.1 PD | 224 | RTVRVRRPPKGKHR   | KFKHTH  | -25.582 |
| >gi 4506267 ref NP_000306 | 51  | LMHNLGKHLNSMER   | VEWLRK  | -45.717 |
| >gi 4506267 ref NP_000306 | 56  | GKHLNSMERVEWLR   | KKLQDV  | -32.21  |
| >gi 4506267 ref NP_000306 | 75  | VHNFVALGAPLAPR   | DAGSQR  | -22.412 |
| >gi 4506267 ref NP_000306 | 81  | LGAPLAPRDAGSQR   | PRKKED  | -36.043 |
| >gi 4506267 ref NP_000306 | 83  | APLAPRDAGSQRPR   | KKEDNV  | -23.743 |
| >gi 8134669 sp O08665.1 S | 31  | ARANYANGKNNVPR   | LKLSYK  | -28.092 |
| >gi 8134669 sp O08665.1 S | 66  | NSSSYHTFLLDEER   | SRLYVG  | -42.119 |
| >gi 8134669 sp O08665.1 S | 68  | SSYHTFLLDEERSR   | LYVGAK  | -51.855 |
| >gi 8134669 sp O08665.1 S | 99  | KDFQKIVWPVSYTR   | RDECKW  | -30.303 |
| >gi 8134669 sp O08665.1 S | 100 | DFQKIVWPVSYTRR   | DECKWA  | -20.112 |
| >gi 8134669 sp O08665.1 S | 166 | NIFKLQDSHFENGR   | GKSPYD  | -30.861 |
| >gi 8134669 sp O08665.1 S | 197 | GELYSGTAADFMR    | DFAIFR  | -37.224 |
| >gi 8134669 sp O08665.1 S | 203 | TAADFMRDFAIFR    | TLGHHH  | -43.78  |
| >gi 8134669 sp O08665.1 S | 212 | FAIFRTLGHHPHPIR  | TEQHDS  | -20.006 |
| >gi 8134669 sp O08665.1 S | 219 | GHHHPHPIRTEQHDSR | WLNDPR  | -39.001 |
| >gi 8134669 sp O08665.1 S | 225 | RTEQHDSRWLNDPR   | FISAHL  | -35.632 |
| >gi 8134669 sp O08665.1 S | 248 | SDNPEDDKVYFFFR   | ENAI DG | -40.064 |
| >gi 8134669 sp O08665.1 S | 264 | AIDGESHGKATHAR   | IGQICK  | -27.509 |
| >gi 8134669 sp O08665.1 S | 277 | RIGQICKNDFGGHR   | SLVNKW  | -30.214 |
| >gi 8134669 sp O08665.1 S | 290 | RSLVNKWTTFLKAR   | LICSVP  | -30.334 |
| >gi 8134669 sp O08665.1 S | 349 | KGSAVCMYSMSDVR   | RVFLGP  | -35.767 |
| >gi 8134669 sp O08665.1 S | 350 | GSAVCMYSMSDVRR   | VFLGPY  | -31.717 |
| >gi 8134669 sp O08665.1 S | 359 | SDVRRVFLGPYAHR   | DGPNYQ  | -25.521 |
| >gi 8134669 sp O08665.1 S | 372 | RDGPNYQWVPYQGR   | VPYPRP  | -33.259 |
| >gi 8134669 sp O08665.1 S | 377 | YQWVPYQGRVPYPR   | PGTCPS  | -24.103 |
| >gi 8134669 sp O08665.1 S | 404 | STKDLPDDVITFAR   | SHPAMY  | -29.554 |
| >gi 8134669 sp O08665.1 S | 419 | HPAMYNPVFPINNR   | PIMIKT  | -28.947 |
| >gi 8134669 sp O08665.1 S | 438 | TDVNYQFTQIVVDR   | VDAEDG  | -37.277 |
| >gi 8134669 sp O08665.1 S | 484 | DLEEVLEEMTVFR    | EPTTIS  | -38.868 |
| >gi 8134669 sp O08665.1 S | 516 | IGSTAGVAQLPLHR   | CDIYGK  | -28.8   |
| >gi 8134669 sp O08665.1 S | 531 | DIYGKACAECCLAR   | DPYCAW  | -39.474 |
| >gi 8134669 sp O08665.1 S | 544 | RDYCAWDGSSCSR    | YFPTAK  | -34.899 |
| >gi 8134669 sp O08665.1 S | 551 | DGSSCSRYFPTAKR   | RTRRQD  | -21.593 |
| >gi 8134669 sp O08665.1 S | 552 | GSSCSRYFPTAKRR   | TRRQDI  | -21.85  |
| >gi 8134669 sp O08665.1 S | 554 | SCSRYFPTAKRRTR   | RQDIRN  | 7.335   |

|                           |     |                |        |         |
|---------------------------|-----|----------------|--------|---------|
| >gi 8134669 sp O08665.1 S | 559 | FPTAKRRTRRQDIR | NGDPLT | -23.112 |
| >gi 8134669 sp O08665.1 S | 584 | QHHDNHHGSPLEER | IYGVVE | -40.177 |
| >gi 8134669 sp O08665.1 S | 604 | NSSTFLECSPKSQR | ALVYWQ | -2.355  |
| >gi 8134669 sp O08665.1 S | 613 | PKSQRALVYWQFQR | RNEDRK | -34.518 |
| >gi 8134669 sp O08665.1 S | 614 | KSQRALVYWQFQRR | NEDRKE | -30.265 |
| >gi 8134669 sp O08665.1 S | 618 | ALVYWQFQRRNEDR | KEEIRM | -33.173 |
| >gi 8134669 sp O08665.1 S | 623 | QFQRRNEDRKEEIR | MGDHII | -26.417 |
| >gi 8134669 sp O08665.1 S | 630 | DRKEEIRMGDHIIR | TEQGLL | -29.87  |
| >gi 8134669 sp O08665.1 S | 638 | GDHIIRTEQGLLR  | SLQKKD | -20.999 |
| >gi 8134669 sp O08665.1 S | 705 | MSSSMTSPQKVWYR | DFMQLI | -15.739 |
| >gi 8134669 sp O08665.1 S | 729 | LNTMDEFCEQVWKR | DRKQRR | -22.264 |
| >gi 8134669 sp O08665.1 S | 731 | TMDEFCEQVWKRDR | KQRRQR | -33.59  |
| >gi 8134669 sp O08665.1 S | 734 | EFCEQVWKRDRKQR | RQRPGH | 3.611   |
| >gi 8134669 sp O08665.1 S | 735 | FCEQVWKRDRKQRR | QRPGHS | 5.267   |
| >gi 8134669 sp O08665.1 S | 737 | EQVWKRDRKQRRQR | PGHSQG | 5.179   |
| >gi 8134669 sp O08665.1 S | 758 | SNKWKHMQESKKGR | NRRTHE | -13.115 |
| >gi 8134669 sp O08665.1 S | 760 | KWKHMQESKKGRNR | RTHEFE | -16.771 |
| >gi 8134669 sp O08665.1 S | 761 | WKHMQESKKGRNRR | THEFER | 2.217   |
| >gi 8134669 sp O08665.1 S | 767 | SKKGRNRRTHEFER | APRSV- | -34.329 |
| >gi 8134669 sp O08665.1 S | 770 | GRNRRTHEFERAPR | SV---- | -0.699  |
| >gi 21542456 sp P02778.2  | 26  | FLTLSGIQGVPLSR | TVRCTC | -29.458 |
| >gi 21542456 sp P02778.2  | 29  | LSGIQGVPLSRTVR | CTCISI | 0.604   |
| >gi 21542456 sp P02778.2  | 43  | CTCISISNPVNPR  | SLEKLE | -15.992 |
| >gi 21542456 sp P02778.2  | 59  | EKLEIIPASQFCPR | VEIIAT | -41.207 |
| >gi 21542456 sp P02778.2  | 73  | VEIIATMKKKGEKR | CLNPES | -10.455 |
| >gi 21542456 sp P02778.2  | 93  | KAIKNLLKAVSKER | SKRSP- | -29.481 |
| >gi 124494 sp P17515.1 CX | 26  | LLGLSGTQGIPLAR | TVRCNC | -27.537 |
| >gi 124494 sp P17515.1 CX | 29  | LSGTQGIPLARTVR | CNCIHI | -2.488  |
| >gi 124494 sp P17515.1 CX | 41  | VRCNCIHIDGPPVR | MRAIGK | -45.101 |
| >gi 124494 sp P17515.1 CX | 43  | CNCIHIDGPPVRMR | AIGKLE | -20.491 |
| >gi 124494 sp P17515.1 CX | 59  | GKLEIIPASLSCPR | VEIIAT | -39.14  |
| >gi 124494 sp P17515.1 CX | 73  | VEIIATMKKNDEQR | CLNPES | -25.245 |
| >gi 124494 sp P17515.1 CX | 93  | KTIKNLMKAFSQKR | SKRAP- | -14.97  |
| >gi 63025222 ref NP_00065 | 25  | LLPLLWLLVLTGR  | PAAGLS | -32.025 |
| >gi 63025222 ref NP_00065 | 43  | LSTCKTIDMELVKR | KRIEAI | -31.599 |
| >gi 63025222 ref NP_00065 | 45  | TCKTIDMELVKRKR | IEAIRG | -19.836 |
| >gi 63025222 ref NP_00065 | 50  | DMELVKRKRIEAI  | GQILSK | -27.511 |
| >gi 63025222 ref NP_00065 | 58  | RIEAIHQILSKLR  | LASPPS | -34.512 |
| >gi 63025222 ref NP_00065 | 85  | PLPEAVLALYNSTR | DRVAGE | -35.128 |
| >gi 63025222 ref NP_00065 | 87  | PEAVLALYNSTRDR | VAGESA | -40.085 |
| >gi 63025222 ref NP_00065 | 110 | PEPEADYYAKEVTR | VLMVET | -28.377 |
| >gi 63025222 ref NP_00065 | 141 | THSIYMFNTSELR  | EAVPEP | -28.879 |
| >gi 63025222 ref NP_00065 | 152 | ELREAVPEPVLLSR | AELRLL | -29.277 |

|                           |     |                |        |         |
|---------------------------|-----|----------------|--------|---------|
| >gi 63025222 ref NP_00065 | 156 | AVPEPVLLSRAELR | LLRLKL | -25.88  |
| >gi 63025222 ref NP_00065 | 159 | EPVLLSRAELRLLR | LKLVKE | -24.418 |
| >gi 63025222 ref NP_00065 | 180 | HVELYQKYSNNSWR | YLSNRL | -28.805 |
| >gi 63025222 ref NP_00065 | 185 | QKYSNNSWRYSNR  | LLAPSD | -30.87  |
| >gi 63025222 ref NP_00065 | 205 | SPEWLSFDVTGVVR | QWLSRG | -32.027 |
| >gi 63025222 ref NP_00065 | 210 | SFDVTGVVRQWLSR | GGEIEG | -22.304 |
| >gi 63025222 ref NP_00065 | 218 | RQWLSRGGEIEGFR | LSAHCS | -46.139 |
| >gi 63025222 ref NP_00065 | 228 | EGFRLSAHCSCDSR | DNTLQV | -40.43  |
| >gi 63025222 ref NP_00065 | 243 | NLQVDINGFTTGR  | RGDLAT | -30.728 |
| >gi 63025222 ref NP_00065 | 244 | TLQVDINGFTTGRR | GDLATI | -23.445 |
| >gi 63025222 ref NP_00065 | 255 | GRRGDLATIHGMNR | PFLLLM | -39.11  |
| >gi 63025222 ref NP_00065 | 267 | NRPFLLMATPLER  | AQHLQS | -33.555 |
| >gi 63025222 ref NP_00065 | 275 | ATPLERAQHLQSSR | HRRALD | -23.042 |
| >gi 63025222 ref NP_00065 | 277 | PLERAQHLQSSRHR | RALDTN | -22.663 |
| >gi 63025222 ref NP_00065 | 296 | NYCFSSTEKNCCVR | QLYIDF | -29.09  |
| >gi 63025222 ref NP_00065 | 303 | EKNCCVRQLYIDFR | KDLGWK | -39.481 |
| >gi 63025222 ref NP_00065 | 372 | QALEPLPIVYVGR  | KPKVEQ | -37.137 |
| >gi 63025222 ref NP_00065 | 385 | RKPKVEQLSNMIVR | SCKCS- | -26.055 |
| >gi 557563 gb AAA50405.1  | 34  | LSTCSTLDMQFMR  | KRIEAI | -43.086 |
| >gi 557563 gb AAA50405.1  | 36  | TCSTLDMQFMRKR  | IEAIRG | -31.478 |
| >gi 557563 gb AAA50405.1  | 41  | DMDQFMRKRIEAI  | GQILSK | -27.511 |
| >gi 557563 gb AAA50405.1  | 75  | EVPPEVISIYNSTR | DLLQEK | -35.786 |
| >gi 557563 gb AAA50405.1  | 84  | YNSTRDLLQEKASR | RAAACE | -12.977 |
| >gi 557563 gb AAA50405.1  | 85  | NSTRDLLQEKASRR | AAACER | -12.336 |
| >gi 557563 gb AAA50405.1  | 91  | LQEASRRAAACER  | ERSDEE | -39.633 |
| >gi 557563 gb AAA50405.1  | 93  | EKASRRAAACERER | SDEEYY | -41.934 |
| >gi 557563 gb AAA50405.1  | 123 | PPFPSEAIPTFYR  | PYFRIV | -40.926 |
| >gi 557563 gb AAA50405.1  | 127 | SEAIPTFYRPFYR  | IVRFDV | -33.12  |
| >gi 557563 gb AAA50405.1  | 130 | IPPTFYRPFYRIVR | FDVSAM | -7.109  |
| >gi 557563 gb AAA50405.1  | 149 | MEKNASNLVKAEFR | VFRLQN | -36.843 |
| >gi 557563 gb AAA50405.1  | 152 | NASNLVKAEFRVFR | LQNPKA | -29.982 |
| >gi 557563 gb AAA50405.1  | 159 | AEFRVFRVFNPKAR | VPEQRI | -29.839 |
| >gi 557563 gb AAA50405.1  | 164 | FRLQNPKARVPEQR | IELYQI | -32.999 |
| >gi 557563 gb AAA50405.1  | 182 | QILKSKDLTSPTQR | YIDSKV | -22.238 |
| >gi 557563 gb AAA50405.1  | 192 | PTQRYIDSKVVKTR | AEGEWL | -7.773  |
| >gi 557563 gb AAA50405.1  | 215 | VTDAVHEWLHHKDR | NLGFKI | -13.929 |
| >gi 557563 gb AAA50405.1  | 248 | NYIIPNKSELEAR  | FAGIDG | -35.373 |
| >gi 557563 gb AAA50405.1  | 270 | TYTSGDQKTIKSTR | KKNSGK | -20.897 |
| >gi 557563 gb AAA50405.1  | 289 | KTPHLLMLLPSYR  | LESQQT | -40.564 |
| >gi 557563 gb AAA50405.1  | 297 | LLPSYRLESQQTNR | RKKRAL | -25.617 |
| >gi 557563 gb AAA50405.1  | 298 | LPSYRLESQQTNR  | KKRALD | -25.333 |
| >gi 557563 gb AAA50405.1  | 310 | RRKKRALDAAYCFR | NVQDNC | -34.118 |
| >gi 557563 gb AAA50405.1  | 319 | AYCFRNVQDNCCLR | PLYIDF | -42.395 |

|                           |     |                   |         |         |
|---------------------------|-----|-------------------|---------|---------|
| >gi 557563 gb AAA50405.1  | 327 | DNCCLRPLYIDFKR    | DLGWKW  | -20.262 |
| >gi 557563 gb AAA50405.1  | 361 | ACPYLWSSDTQHSR    | VLSLYN  | -36.347 |
| >gi 13124605 sp O75888.1  | 23  | APKGPPGNMGGPVR    | EPALSV  | -29.801 |
| >gi 13124605 sp O75888.1  | 59  | MALLTQQTEQLSLR    | REVSRL  | -35.553 |
| >gi 13124605 sp O75888.1  | 60  | ALLTQQTEQLSLRR    | EVSRLQ  | -13.079 |
| >gi 13124605 sp O75888.1  | 64  | QQTEQLSLRREVS     | LQGTGG  | -23.137 |
| >gi 13124605 sp O75888.1  | 99  | QSSDALEAWENGER    | SRKRRR  | -42.115 |
| >gi 13124605 sp O75888.1  | 101 | SDALEAWENGERSR    | KRRAVL  | -34.558 |
| >gi 13124605 sp O75888.1  | 103 | ALEAWENGERSRKR    | RAVLTQ  | -15.519 |
| >gi 13124605 sp O75888.1  | 143 | DSDVTEVMWQPALR    | RGRGLQ  | -35.712 |
| >gi 13124605 sp O75888.1  | 144 | SDVTEVMWQPALRR    | GRGLQA  | -19.665 |
| >gi 13124605 sp O75888.1  | 146 | VTEVMWQPALRRGR    | GLQAQG  | 2.09    |
| >gi 13124605 sp O75888.1  | 156 | RRGRGLQAQGYGVR    | IQDAGV  | -36.934 |
| >gi 13124605 sp O75888.1  | 184 | FQDVTFTMGQVVS     | EGQGRQ  | -21.941 |
| >gi 13124605 sp O75888.1  | 189 | FTMGQVVSREGQGR    | QETLFR  | -29.973 |
| >gi 13124605 sp O75888.1  | 195 | VSREGQGRQETLFR    | CIRSMP  | -36.914 |
| >gi 13124605 sp O75888.1  | 198 | EGQGRQETLFR CIR   | SMP SHP | -25.767 |
| >gi 13124605 sp O75888.1  | 206 | LFRCIRSMP SHPDR   | AYNSCY  | -31.541 |
| >gi 13124605 sp O75888.1  | 231 | HLHQGDILSVIIPR    | ARAKLN  | -18.557 |
| >gi 13124605 sp O75888.1  | 233 | HQGDILSVIIPRAR    | AKLNLS  | -29.042 |
| >gi 1718154 sp P49767.1 V | 23  | ACSLAAALLPGPR     | EAPAAA  | -24.367 |
| >gi 1718154 sp P49767.1 V | 61  | ATAYASKDLEEQLR    | SVSSVD  | -28.786 |
| >gi 1718154 sp P49767.1 V | 86  | LYPEYWKMYKCQLR    | KGGWQH  | -30.159 |
| >gi 1718154 sp P49767.1 V | 94  | YKCQLRKGQWQHNR    | EQANLN  | -29.829 |
| >gi 1718154 sp P49767.1 V | 102 | GWQHNREQANLNSR    | TEETIK  | -34.834 |
| >gi 1718154 sp P49767.1 V | 127 | YNTEILKSIDNEWR    | KTQCMP  | -45.474 |
| >gi 1718154 sp P49767.1 V | 134 | SIDNEWKRKTQCMPR   | EVCIDV  | -24.107 |
| >gi 1718154 sp P49767.1 V | 161 | TNTFFKPPCVSVYR    | CGGCCN  | -39.971 |
| >gi 1718154 sp P49767.1 V | 210 | KPVTISFANHTSCR    | CMSKLD  | -37.097 |
| >gi 1718154 sp P49767.1 V | 219 | HTSCRCMSKLDVYR    | QVHSII  | -27.177 |
| >gi 1718154 sp P49767.1 V | 226 | SKLDVYRQVHSIIR    | RSLPAT  | -25.146 |
| >gi 1718154 sp P49767.1 V | 255 | TCPTNYMWNHICR     | CLAQED  | -27.505 |
| >gi 1718154 sp P49767.1 V | 296 | NKELDEETCQCVC     | AGLRPA  | -40.868 |
| >gi 1718154 sp P49767.1 V | 300 | DEETCQCVC RAGLR   | PASC GP | -27.773 |
| >gi 1718154 sp P49767.1 V | 312 | LRPASC GPHKELDR   | NSCQCV  | -29.167 |
| >gi 1718154 sp P49767.1 V | 332 | CKNKLFP SQCGANR   | EF DENT | -38.316 |
| >gi 1718154 sp P49767.1 V | 345 | REF DENTCQCVC KR  | TC PRNQ | -32.393 |
| >gi 1718154 sp P49767.1 V | 349 | ENTCQCVC KR TC PR | NQ PLNP | -21.98  |
| >gi 1718154 sp P49767.1 V | 385 | KGKKFHHQTC SCYR   | RP CTNR | -39.541 |
| >gi 1718154 sp P49767.1 V | 386 | GKKFHHQTC SCYRR   | PCTNRQ  | -29.13  |
| >gi 1718154 sp P49767.1 V | 391 | HQTC SCYRRPCTNR   | QKACEP  | -20.628 |
| >gi 1718154 sp P49767.1 V | 407 | ACEPGFSYSEEVCR    | CVPSYW  | -40.011 |
| >gi 1718154 sp P49767.1 V | 415 | SEEVCR CVPSYWKR   | PQMS--  | -21.158 |

|                           |     |                 |        |         |
|---------------------------|-----|-----------------|--------|---------|
| >gi 17367984 sp O43915.1  | 31  | LVQGSSNEHGPKR   | SSQSTL | -9.929  |
| >gi 17367984 sp O43915.1  | 39  | HGPVKRSSQSTLER  | SEQQIR | -36.705 |
| >gi 17367984 sp O43915.1  | 45  | SSQSTLERSEQQIR  | AASSLE | -26.506 |
| >gi 17367984 sp O43915.1  | 55  | QQIRAASSLEELLR  | ITHSED | -40.18  |
| >gi 17367984 sp O43915.1  | 66  | LLRITHSEDWKLWR  | CRLRLK | -34.953 |
| >gi 17367984 sp O43915.1  | 68  | RITHSEDWKLWRCR  | LRLKSF | -34.936 |
| >gi 17367984 sp O43915.1  | 70  | THSEDWKLWRCRLR  | LKSFTS | -27.667 |
| >gi 17367984 sp O43915.1  | 80  | CRLRLKSFTSMDSR  | SASHRS | -25.924 |
| >gi 17367984 sp O43915.1  | 85  | KSFTSMDSRSASHR  | STRFAA | -12.883 |
| >gi 17367984 sp O43915.1  | 108 | DIETLKVIDEEWQR  | TQCSPR | -53.615 |
| >gi 17367984 sp O43915.1  | 114 | VIDEEWQRTQCSPR  | ETCVEV | -22.83  |
| >gi 17367984 sp O43915.1  | 141 | TNTFFKPPCVNVFR  | CGGCCN | -40.629 |
| >gi 17367984 sp O43915.1  | 197 | ANHTGCKCLPTAPR  | HPYSII | -27.239 |
| >gi 17367984 sp O43915.1  | 204 | CLPTAPRHPYSIIR  | RSIQIP | -29.103 |
| >gi 17367984 sp O43915.1  | 214 | SIIRRSIQIPEEDR  | CSHSKK | -45.594 |
| >gi 17367984 sp O43915.1  | 268 | PALCGPHMMFDEDR  | CECVCK | -54.726 |
| >gi 17367984 sp O43915.1  | 317 | HKLFHPDTCSCEDR  | CPFHTR | -44.334 |
| >gi 17367984 sp O43915.1  | 323 | DTCSCEDRCPFHTR  | PCASGK | -38.763 |
| >gi 17367984 sp O43915.1  | 337 | PCASGKTACAKHCR  | FPKEKR | -28.281 |
| >gi 17367984 sp O43915.1  | 343 | TACAKHCRFPKEKR  | AAQGPH | 5.328   |
| >gi 17367984 sp O43915.1  | 351 | FPKEKRAAQGPHSR  | KNP--- | -33.159 |
| >gi 4502027 ref NP_000468 | 23  | LFLFSSAYSRGVFR  | RDAHKS | -25.935 |
| >gi 4502027 ref NP_000468 | 34  | VFRRDAHKSEVAHR  | FKDLGE | -22.808 |
| >gi 4502027 ref NP_000468 | 105 | TLFGDKLCTVATLR  | ETYGEM | -22.672 |
| >gi 4502027 ref NP_000468 | 122 | GEMADCCAKQEPER  | NECFLQ | -40.948 |
| >gi 4502027 ref NP_000468 | 138 | CFLQHKKDDNPNLPR | LVRPEV | -30.201 |
| >gi 4502027 ref NP_000468 | 141 | QHKDDNPNLPRLVR  | PEVDVM | -4.489  |
| >gi 4502027 ref NP_000468 | 168 | EETFLKKYLYEIAR  | RHPYFY | -39.039 |
| >gi 4502027 ref NP_000468 | 169 | ETFLKKYLYEIARR  | HPYFYA | -18.066 |
| >gi 4502027 ref NP_000468 | 184 | PYFYAPELFFAKR   | YKAAFT | -23.271 |
| >gi 4502027 ref NP_000468 | 210 | DKAACLPLKDELRL  | DEGKAS | -30.838 |
| >gi 4502027 ref NP_000468 | 221 | ELRDEGKASSAKQR  | LKCASL | -28.922 |
| >gi 4502027 ref NP_000468 | 233 | QRLKCASLQKFGER  | AFKAWA | -32.671 |
| >gi 4502027 ref NP_000468 | 242 | KFGERAFKAWAVAR  | LSQRFP | -33.824 |
| >gi 4502027 ref NP_000468 | 246 | RAFKAWAVARLSQR  | FPKAEF | -6.225  |
| >gi 4502027 ref NP_000468 | 281 | ECCHGDLLECADDR  | ADLAKY | -51.752 |
| >gi 4502027 ref NP_000468 | 360 | KDVFLGMFLYFYAR  | RHPDYS | -40.012 |
| >gi 4502027 ref NP_000468 | 361 | DVFLGMFLYFYARR  | HPDYSV | -25.464 |
| >gi 4502027 ref NP_000468 | 372 | ARRHPDYSVLLLLR  | LAKTYE | -30.44  |
| >gi 4502027 ref NP_000468 | 434 | QLGEYKFQNALLVR  | YTKKVP | -27.667 |
| >gi 4502027 ref NP_000468 | 452 | VPQVSTPTLVEVSR  | NLGKVG | -28.641 |
| >gi 4502027 ref NP_000468 | 469 | KVGSCKCKHPEAKR  | MPCAED | -19.765 |
| >gi 4502027 ref NP_000468 | 496 | QLCVLHEKTPVSDR  | VTKCCT | -32.021 |



|                           |     |                |        |         |
|---------------------------|-----|----------------|--------|---------|
| >gi 4502027 ref NP_000468 | 508 | DRVTKCTESLVNR  | RPCFSA | -34.481 |
| >gi 4502027 ref NP_000468 | 509 | RVTKCCTESLVNRR | PCFSAL | -16.394 |
| >gi 4502027 ref NP_000468 | 545 | TFHADICTLSEKER | QIKKQT | -35.951 |
| >gi 113580 sp P02770 ALBU | 23  | LFISGSFAFRGVFR | REAHKS | -26.752 |
| >gi 113580 sp P02770 ALBU | 34  | VFRREAHKSEIAHR | FKDLGE | -22.245 |
| >gi 113580 sp P02770 ALBU | 105 | TLFGDKLCAIPKLR | DNYGEL | -24.02  |
| >gi 113580 sp P02770 ALBU | 122 | GELADCCAKQEPER | NECFLQ | -41.006 |
| >gi 113580 sp P02770 ALBU | 141 | QHKDDNPNLPPFQR | PEAEAM | -34.201 |
| >gi 113580 sp P02770 ALBU | 168 | PTSFLGHYLHEVAR | RHPYFY | -34.084 |
| >gi 113580 sp P02770 ALBU | 169 | TSFLGHYLHEVARR | HPYFYA | -6.046  |
| >gi 113580 sp P02770 ALBU | 219 | LDVAVKEKALVAVR | QRMKCS | -30.083 |
| >gi 113580 sp P02770 ALBU | 221 | AVKEKALVAVRQR  | MKCSSM | -20.162 |
| >gi 113580 sp P02770 ALBU | 229 | AAVRQRMKCSSMQR | FGERAF | -32.648 |
| >gi 113580 sp P02770 ALBU | 233 | QRMKCSSMQRFGER | AFKAWA | -30.082 |
| >gi 113580 sp P02770 ALBU | 242 | RFGERAFKAWAVAR | MSQRFP | -29.439 |
| >gi 113580 sp P02770 ALBU | 246 | RAFKAWAVARMSQR | FPNAEF | -15.928 |
| >gi 113580 sp P02770 ALBU | 281 | ECCHGDLLECADDR | AELAKY | -52.965 |
| >gi 113580 sp P02770 ALBU | 360 | KDVFLGTFLYEYSR | RHPDYS | -39.779 |
| >gi 113580 sp P02770 ALBU | 361 | DVFLGTFLYEYSRR | HPDYSV | -22.967 |
| >gi 113580 sp P02770 ALBU | 372 | SRRHPDYSVSLLLR | LAKKYE | -29.452 |
| >gi 113580 sp P02770 ALBU | 434 | KLGEYGFQNAVLVR | YTQKAP | -22.514 |
| >gi 113580 sp P02770 ALBU | 452 | APQVSTPTLVEAAR | NLGRVG | -28.044 |
| >gi 113580 sp P02770 ALBU | 456 | STPTLVEAARNLGR | VGTKCC | -26.435 |
| >gi 113580 sp P02770 ALBU | 469 | RVGTKCTLPEAQR  | LPCVED | -36.318 |
| >gi 113580 sp P02770 ALBU | 483 | LPCVEDYLSAILNR | LCVLHE | -29.617 |
| >gi 113580 sp P02770 ALBU | 508 | EKVTKCCSGSLVER | RPCFSA | -33.678 |
| >gi 113580 sp P02770 ALBU | 509 | KVTKCCSGSLVERR | PCFSAL | -17.154 |
| >gi 113580 sp P02770 ALBU | 602 | DNCFATEGPNLVAR | SKEALA | -21.474 |
| >gi 119761 sp P00742.2 FA | 27  | LAGLLLLGESLFIR | REQANN | -41.093 |
| >gi 119761 sp P00742.2 FA | 28  | AGLLLLGESLFIRR | EQANNI | -17.438 |
| >gi 119761 sp P00742.2 FA | 37  | LFIRREQANNILAR | VTRANS | -24.99  |
| >gi 119761 sp P00742.2 FA | 40  | RREQANNILARVTR | ANSFLE | 0.054   |
| >gi 119761 sp P00742.2 FA | 55  | NSFLEEMKKGHLER | ECMEET | -22.957 |
| >gi 119761 sp P00742.2 FA | 68  | RECMEETCSYEER  | EVFEDS | -32.394 |
| >gi 119761 sp P00742.2 FA | 126 | LEGFEGKNCELFT  | KLCSLD | -42.423 |
| >gi 119761 sp P00742.2 FA | 153 | CHEEQNSVVCSCAR | GYTLAD | -41.411 |
| >gi 119761 sp P00742.2 FA | 179 | PTGPYPCGKQTLER | RKRSVA | -32.198 |
| >gi 119761 sp P00742.2 FA | 180 | TGPYPCGKQTLERR | KRSVAQ | -22.972 |
| >gi 119761 sp P00742.2 FA | 227 | PFDLLDFNQTPER  | GDNNLT | -34.751 |
| >gi 119761 sp P00742.2 FA | 234 | NQTQPERGDNNLTR | IVGGQE | -37.927 |
| >gi 119761 sp P00742.2 FA | 283 | YILTAAHCLYQAKR | FKVRVG | -21.976 |
| >gi 119761 sp P00742.2 FA | 287 | AAHCLYQAKRFKVR | VGDRNT | -22.05  |
| >gi 119761 sp P00742.2 FA | 291 | LYQAKRFKVRVGDR | NTEQEE | -21.698 |

|                           |     |                 |        |         |
|---------------------------|-----|-----------------|--------|---------|
| >gi 119761 sp P00742.2 FA | 313 | EAVHEVEVVIKHNR  | FTKETY | -7.557  |
| >gi 119761 sp P00742.2 FA | 327 | FTKETYDFDIAVLR  | LKTPIT | -39.115 |
| >gi 119761 sp P00742.2 FA | 335 | DIAVLRCLKTPITFR | MNVAPA | -26.254 |
| >gi 119761 sp P00742.2 FA | 346 | TFRMNVAPACLPER  | DWAEST | -43.723 |
| >gi 119761 sp P00742.2 FA | 366 | LMTQKTGIVSGFGR  | THEKGR | -38.392 |
| >gi 119761 sp P00742.2 FA | 372 | GIVSGFGRTHEKGR  | QSTRLK | -25.313 |
| >gi 119761 sp P00742.2 FA | 376 | GFGRTHEKGRQSTR  | LKMLEV | -20.997 |
| >gi 119761 sp P00742.2 FA | 387 | STRCLKMLEVPYVDR | NSCKLS | -34.846 |
| >gi 119761 sp P00742.2 FA | 426 | DACQGDSGGPHVTR  | FKDTYF | -9.386  |
| >gi 119761 sp P00742.2 FA | 445 | FVTGIVSWGEGCAR  | KGKYG  | -43.79  |
| >gi 119761 sp P00742.2 FA | 464 | IYTKVTAFLKWIDR  | SMKTRG | -31.929 |
| >gi 119761 sp P00742.2 FA | 469 | TAFLKWIDRSMKTR  | GLPKAK | -14.847 |
| >gi 67476446 sp P00740.2  | 43  | VFLDHENANKILNR  | PKRYNS | -9.469  |
| >gi 67476446 sp P00740.2  | 62  | SGKLEEFVQGNLER  | ECMEEK | -37.454 |
| >gi 67476446 sp P00740.2  | 75  | RECMEEKCSFEAR   | EVFENT | -28.562 |
| >gi 67476446 sp P00740.2  | 83  | SFEAREVFENTER   | TTEFWK | -44.934 |
| >gi 67476446 sp P00740.2  | 140 | NCELDVTCNIKNGR  | CEQFCK | -16.261 |
| >gi 67476446 sp P00740.2  | 162 | ADNKVVCSCTEGYR  | LAENQK | -47.374 |
| >gi 67476446 sp P00740.2  | 180 | QKSCEPAVPFPCGR  | VSVSQT | -37.799 |
| >gi 67476446 sp P00740.2  | 191 | CGRVSVSQTSKLTR  | AETVFP | -9.658  |
| >gi 67476446 sp P00740.2  | 226 | NITQSTQSFNDFTR  | VVGGED | -39.914 |
| >gi 67476446 sp P00740.2  | 294 | EHNIEETEHTEQKR  | NVIRII | -16.822 |
| >gi 67476446 sp P00740.2  | 298 | EETEHTEQKRN VIR | IIPHHN | -24.15  |
| >gi 67476446 sp P00740.2  | 358 | FLKFGSGYVSGWGR  | VFHKGR | -38.358 |
| >gi 67476446 sp P00740.2  | 364 | GYVSGWGRV FHKGR | SALVLQ | -8.969  |
| >gi 67476446 sp P00740.2  | 373 | FHKGRSALVLQYLR  | VPLVDR | -32.939 |
| >gi 67476446 sp P00740.2  | 379 | ALVLQYLRVPLVDR  | ATCLRS | -31.549 |
| >gi 67476446 sp P00740.2  | 384 | YLRVPLVDRATCLR  | STKFTI | -21.853 |
| >gi 67476446 sp P00740.2  | 404 | YNNMFCAGFHEGGR  | DSCQGD | -31.191 |
| >gi 67476446 sp P00740.2  | 449 | AMKGKYG IYTKVSR | YVNWIK | -9.089  |
| >gi 116594 sp P01024 CO3_ | 35  | GSPMYSIITPNILR  | LESEET | -35.606 |
| >gi 116594 sp P01024 CO3_ | 94  | NHMGNVFTTIPANR  | EFKSEK | -29.504 |
| >gi 116594 sp P01024 CO3_ | 102 | TIPANREFKSEKGR  | NKFVTV | -23.279 |
| >gi 116594 sp P01024 CO3_ | 148 | DKTIYTPGSTVLYR  | IFTVNH | -33.997 |
| >gi 116594 sp P01024 CO3_ | 161 | RIFTVNHKLLPVGR  | TVMVNI | -30.437 |
| >gi 116594 sp P01024 CO3_ | 207 | DIPELVNMGQWKIR  | AYYENS | -34.972 |
| >gi 116594 sp P01024 CO3_ | 258 | IYNEKLEVTITAR   | FLYGKK | -16.706 |
| >gi 116594 sp P01024 CO3_ | 281 | TAFVIFGIQDGEQR  | ISLPES | -43.46  |
| >gi 116594 sp P01024 CO3_ | 290 | DGEQRISLPESLKR  | IPIEDG | -26.627 |
| >gi 116594 sp P01024 CO3_ | 304 | IPIEDGSGEVVLSR  | KVLLDG | -32.583 |
| >gi 116594 sp P01024 CO3_ | 315 | LSRKVLLDGVQNL   | AEDLVG | -27.767 |
| >gi 116594 sp P01024 CO3_ | 343 | VILHSGSDMVQAER  | SGIPIV | -35.192 |
| >gi 116594 sp P01024 CO3_ | 386 | MVFTNPDGSPAYR   | VPVAVQ | -35.917 |

|                           |     |                |        |         |
|---------------------------|-----|----------------|--------|---------|
| >gi 116594 sp P01024 CO3_ | 425 | NTHPSQKPLSITVR | TKKQEL | -23.75  |
| >gi 116594 sp P01024 CO3_ | 439 | TKKQELSEAEQATR | TMQALP | -40.467 |
| >gi 116594 sp P01024 CO3_ | 462 | VGNSNNYLHLSVLR | TELRPG | -33.356 |
| >gi 116594 sp P01024 CO3_ | 466 | NNYLHLSVLRTEL  | PGETLN | -24.376 |
| >gi 116594 sp P01024 CO3_ | 478 | LRPGETLNVNFLLR | MDRAHE | -30.797 |
| >gi 116594 sp P01024 CO3_ | 481 | GETLNVNFLLRMDR | AHEAKI | -23.915 |
| >gi 116594 sp P01024 CO3_ | 488 | FLLRMDRAHEAKIR | YYTYLI | -38.371 |
| >gi 116594 sp P01024 CO3_ | 499 | KIRYYTYLIMNKGR | LLKAGR | -36.215 |
| >gi 116594 sp P01024 CO3_ | 505 | YLIMNKGRLLKAGR | QVREPG | -6.714  |
| >gi 116594 sp P01024 CO3_ | 508 | MNKGRLLKAGRQVR | EPGQDL | 7.183   |
| >gi 116594 sp P01024 CO3_ | 530 | LPLSITTDIFPSFR | LVAYYT | -37.87  |
| >gi 116594 sp P01024 CO3_ | 544 | LVAYYTLIGASGQR | EVVADS | -25.523 |
| >gi 116594 sp P01024 CO3_ | 573 | VGSLVVKSGQSEDR | QPVPGQ | -39.177 |
| >gi 116594 sp P01024 CO3_ | 592 | QQMTLKIEGDHGAR | VVLVAV | -33.048 |
| >gi 116594 sp P01024 CO3_ | 657 | LTFTSSSGQQTAR  | AELQCP | -35.158 |
| >gi 116594 sp P01024 CO3_ | 668 | AQRAELQCPQPAAR | RRRSVQ | -29.492 |
| >gi 116594 sp P01024 CO3_ | 669 | QRAELQCPQPAARR | RRSVQL | -20.928 |
| >gi 116594 sp P01024 CO3_ | 670 | RAELQCPQPAARRR | RSVQLT | -13.787 |
| >gi 116594 sp P01024 CO3_ | 679 | AARRRRSVQLTEKR | MDKVGK | -22.309 |
| >gi 116594 sp P01024 CO3_ | 691 | KRMDKVGKYPKELR | KCCEDG | -27.606 |
| >gi 116594 sp P01024 CO3_ | 699 | YPKELRKCCEDGMR | ENPMRF | -49.27  |
| >gi 116594 sp P01024 CO3_ | 704 | RKCCEDGMRENPMR | FSCQRR | -26.103 |
| >gi 116594 sp P01024 CO3_ | 709 | DGMRENPMRFSCQR | RTRFIS | -28.201 |
| >gi 116594 sp P01024 CO3_ | 710 | GMRENPMRFSCQRR | TRFISL | -27.16  |
| >gi 116594 sp P01024 CO3_ | 712 | RENPMRFSCQRRT  | FISLGE | -16.281 |
| >gi 116594 sp P01024 CO3_ | 735 | KVFLDCCNYITELR | RQHARA | -32.363 |
| >gi 116594 sp P01024 CO3_ | 736 | VFLDCCNYITELRR | QHARAS | -31.859 |
| >gi 116594 sp P01024 CO3_ | 740 | CCNYITELRRQHAR | ASHLGL | -8.28   |
| >gi 116594 sp P01024 CO3_ | 748 | RRQHARASHLGLAR | SNLDED | -20.052 |
| >gi 116594 sp P01024 CO3_ | 764 | LDEDIIAENIVSR  | SEFPES | -30.502 |
| >gi 116594 sp P01024 CO3_ | 834 | FEVTVMQDFFIDLR | LPYSVV | -38.993 |
| >gi 116594 sp P01024 CO3_ | 841 | DDFIDLRLPYSVVR | NEQVEI | -37.475 |
| >gi 116594 sp P01024 CO3_ | 848 | LPYSVVRNEQVEIR | AVLYNY | -31.887 |
| >gi 116594 sp P01024 CO3_ | 855 | NEQVEIRAVLYNYR | QNQELK | -34.151 |
| >gi 116594 sp P01024 CO3_ | 863 | VLYNYRQNQELKVR | VELLHN | -39.476 |
| >gi 116594 sp P01024 CO3_ | 880 | LHNPAFCSLATTKR | RHQQTV | -23.087 |
| >gi 116594 sp P01024 CO3_ | 881 | HNPAFCSLATTKRR | HQQTVT | -17.509 |
| >gi 116594 sp P01024 CO3_ | 926 | KAAYVHHFISDGVR | KSLKVV | -39.669 |
| >gi 116594 sp P01024 CO3_ | 937 | GVRKSLKVVPEGIR | MNKTVA | -39.28  |
| >gi 116594 sp P01024 CO3_ | 945 | VPEGIRMNKTVAVR | TLDPER | -10.743 |
| >gi 116594 sp P01024 CO3_ | 951 | MNKTVAVRTLDPER | LGREGV | -46.61  |
| >gi 116594 sp P01024 CO3_ | 954 | TVAVRTLDPERLGR | EGVQKE | -3.114  |
| >gi 116594 sp P01024 CO3_ | 979 | DLSDQVPDTESETR | ILLQGT | -39.655 |

|                           |      |                 |        |         |
|---------------------------|------|-----------------|--------|---------|
| >gi 116594 sp P01024 CO3_ | 999  | PVAQMTEDAVDAER  | LKHLIV | -43.833 |
| >gi 116594 sp P01024 CO3_ | 1042 | DETEQWEKFGLEKR  | QGALEL | -22.923 |
| >gi 116594 sp P01024 CO3_ | 1060 | ELIKKGYTQQLAFR  | QPSSAF | -34.912 |
| >gi 116594 sp P01024 CO3_ | 1072 | FRQPSSAFAAFVKR  | APSTWL | -14.373 |
| >gi 116594 sp P01024 CO3_ | 1134 | DAPVIHQEMIGGLR  | NNNEKD | -32.252 |
| >gi 116594 sp P01024 CO3_ | 1185 | AGDFLEANYMNLQR  | SYTVAI | -34.317 |
| >gi 116594 sp P01024 CO3_ | 1201 | TVAIAGYALAQMGR  | LKGPLL | -32.594 |
| >gi 116594 sp P01024 CO3_ | 1219 | LLNKFLTAKDKNR   | WEDPGK | -35.47  |
| >gi 116594 sp P01024 CO3_ | 1254 | LQLKDFDFVPPVVR  | WLNEQR | -31.562 |
| >gi 116594 sp P01024 CO3_ | 1260 | DFVPPVVRWLNEQR  | YGGGGY | -42.89  |
| >gi 116594 sp P01024 CO3_ | 1303 | QELNLDVSLQLPSR  | SSKITH | -23.51  |
| >gi 116594 sp P01024 CO3_ | 1310 | SLQLPSRSSKITHR  | IHWESA | -24.246 |
| >gi 116594 sp P01024 CO3_ | 1320 | ITHRIHWESASLLR  | SEETKE | -27.114 |
| >gi 116594 sp P01024 CO3_ | 1376 | LKVTIKPAPETEKR  | PQDAKN | -24.948 |
| >gi 116594 sp P01024 CO3_ | 1391 | QDAKNTMILEICTR  | YRGDQD | -34.526 |
| >gi 116594 sp P01024 CO3_ | 1393 | AKNTMILEICTRYR  | GDQDAT | -42.12  |
| >gi 116594 sp P01024 CO3_ | 1427 | DTDDLKQLANGVDR  | YISKYE | -35.217 |
| >gi 116594 sp P01024 CO3_ | 1441 | YISKYELDKAFSDR  | NTLIY  | -28.65  |
| >gi 116594 sp P01024 CO3_ | 1491 | KVYAYYNLEESCTR  | FYHPEK | -50.829 |
| >gi 116594 sp P01024 CO3_ | 1507 | HPEKEDGKLNKLCR  | DELCRC | -26.207 |
| >gi 116594 sp P01024 CO3_ | 1512 | DGKLNKLCRDELRCR | CAEENC | -32.186 |
| >gi 116594 sp P01024 CO3_ | 1532 | FIQKSDDKVTLEER  | LDKACE | -43.68  |
| >gi 116594 sp P01024 CO3_ | 1548 | KACEPGVDYVYKTR  | LVKVQL | -31.936 |
| >gi 116594 sp P01024 CO3_ | 1582 | IKSGSDEVQVGQQR  | TFISPI | -35.759 |
| >gi 116594 sp P01024 CO3_ | 1591 | VGQQRTFISPIKCR  | EALKLE | -20.498 |
| >gi 131067 sp P04070.1 PR | 32   | TPAPLDSVFSSSER  | AHQVLR | -40.352 |
| >gi 131067 sp P04070.1 PR | 38   | SVFSSSERAHQVLR  | IRKRAN | -27.96  |
| >gi 131067 sp P04070.1 PR | 40   | FSSSERAHQVLRIR  | KRANSF | -28.028 |
| >gi 131067 sp P04070.1 PR | 51   | RIRKRANSFLEELR  | HSSLER | -34.045 |
| >gi 131067 sp P04070.1 PR | 57   | NSFLEELRHSSLER  | ECIEEI | -32.037 |
| >gi 131067 sp P04070.1 PR | 123  | TCIDGIGSFSCDCR  | SGWEGR | -40.444 |
| >gi 131067 sp P04070.1 PR | 129  | GSFSCDCRSGWEGR  | FCQREV | -27.788 |
| >gi 131067 sp P04070.1 PR | 133  | CDCRSGWEGRFCQR  | EVSFLN | -20.843 |
| >gi 131067 sp P04070.1 PR | 158  | GGCTHYCLEEVGWR  | RCSCAP | -43.333 |
| >gi 131067 sp P04070.1 PR | 159  | GCTHYCLEEVGWRR  | CSCAPG | -23.724 |
| >gi 131067 sp P04070.1 PR | 185  | LLQCHPAVKFPCGR  | PWKRME | -35.271 |
| >gi 131067 sp P04070.1 PR | 189  | HPAVKFPCGRPWKR  | MEKKRS | -20.869 |
| >gi 131067 sp P04070.1 PR | 194  | FPCGRPWKRMEKKR  | SHLKR  | -16.357 |
| >gi 131067 sp P04070.1 PR | 211  | KRDTEQEDQVDPR   | LIDGKM | -37.226 |
| >gi 131067 sp P04070.1 PR | 219  | DQVDPRLIDGKMTR  | RGDSPW | -15.819 |
| >gi 131067 sp P04070.1 PR | 220  | QVDPRLIDGKMTRR  | GDSPWQ | -11.494 |
| >gi 131067 sp P04070.1 PR | 264  | AAHCMDESKLLVR   | LGEYDL | -25.081 |
| >gi 131067 sp P04070.1 PR | 271  | SKKLLVRLGEYDLR  | RWEKWE | -40.373 |

|                           |     |                 |        |         |
|---------------------------|-----|-----------------|--------|---------|
| >gi 131067 sp P04070.1 PR | 272 | KKLLVRLGEYDLRR  | WEKWEL | -37.914 |
| >gi 131067 sp P04070.1 PR | 328 | IVPICLPDSGLAER  | ELNQAG | -31.89  |
| >gi 131067 sp P04070.1 PR | 348 | QETLVGTGWGYHSSR | EKEAKR | -14.917 |
| >gi 131067 sp P04070.1 PR | 354 | GWGYHSSREKEAKR  | NRTFVL | -24.609 |
| >gi 131067 sp P04070.1 PR | 356 | GYHSSREKEAKRNR  | TFVLNF | -20.98  |
| >gi 131067 sp P04070.1 PR | 394 | VSENMLCAGILGDR  | QDACEG | -38.2   |
| >gi 131067 sp P04070.1 PR | 440 | GLLHNYGVYTKVSR  | YLDWIH | -9.862  |
| >gi 131067 sp P04070.1 PR | 450 | KVSRYLWDWIHGHIR | DKEAPQ | -32.286 |
| >gi 4507907 ref NP_000543 | 27  | ALILPGTLCAEGTR  | GRSSTA | -41.533 |
| >gi 4507907 ref NP_000543 | 29  | ILPGTLCAEGTRGR  | SSTARC | -28.507 |
| >gi 4507907 ref NP_000543 | 34  | LCAEGTRGRSSTAR  | CSLFGS | -15     |
| >gi 4507907 ref NP_000543 | 68  | GYCSYLLAGGCQKR  | SFSIIG | -17.108 |
| >gi 4507907 ref NP_000543 | 81  | RSFSIIGDFQNGKR  | VLSLVY | -29.826 |
| >gi 4507907 ref NP_000543 | 108 | HLFVNGTVTQGDQR  | VSMPYA | -39.232 |
| >gi 4507907 ref NP_000543 | 139 | YYKLSGEAYGFVAR  | IDGSGN | -34.325 |
| >gi 4507907 ref NP_000543 | 153 | IDGSGNFQVLLSDR  | YFNKTC | -38.642 |
| >gi 4507907 ref NP_000543 | 202 | NSWALSSGEQWCER  | ASPPSS | -46.92  |
| >gi 4507907 ref NP_000543 | 236 | EQCQLLKSTSVFAR  | CHPLVD | -24.961 |
| >gi 4507907 ref NP_000543 | 273 | GLECACPALLEYAR  | TCAQEG | -39.989 |
| >gi 4507907 ref NP_000543 | 302 | SACSPVCPAGMEYR  | QCVSPC | -35.296 |
| >gi 4507907 ref NP_000543 | 310 | AGMEYRQCVSPCAR  | TCQSLH | -37.477 |
| >gi 4507907 ref NP_000543 | 324 | TCQSLHINEMCQER  | CVDGCS | -42.968 |
| >gi 4507907 ref NP_000543 | 356 | VESTTEPCVHSGKR  | YPPGTS | -19.875 |
| >gi 4507907 ref NP_000543 | 365 | HSGKRYPPGTSLSR  | DCNTCI | -27.139 |
| >gi 4507907 ref NP_000543 | 373 | GTSLSRDCNTCICR  | NSQWIC | -34.763 |
| >gi 4507907 ref NP_000543 | 402 | LVTGQSHFKSFDNR  | YFTFSG | -32.308 |
| >gi 4507907 ref NP_000543 | 416 | YFTFSGICQYLLAR  | DCQDHS | -33.976 |
| >gi 4507907 ref NP_000543 | 436 | FSIVIETVQCADDR  | DAVCTR | -44.471 |
| >gi 4507907 ref NP_000543 | 442 | TVQCADDRDAVCTR  | SVTVRL | -26.68  |
| >gi 4507907 ref NP_000543 | 447 | DDRDAVCTRSVTVR  | LPGLHN | -18.289 |
| >gi 4507907 ref NP_000543 | 481 | GQDIQLPLLKGDLR  | IQHTVT | -34.476 |
| >gi 4507907 ref NP_000543 | 491 | GDLRIQHTVTASVR  | LSYGED | -32.147 |
| >gi 4507907 ref NP_000543 | 505 | LSYGEDLQMDWDGR  | GRLLVK | -41.62  |
| >gi 4507907 ref NP_000543 | 507 | YGEDLQMDWDGRGR  | LLVKLS | -40.239 |
| >gi 4507907 ref NP_000543 | 545 | GDDFLTPSGLAEPR  | VEDFGN | -37.234 |
| >gi 4507907 ref NP_000543 | 575 | LQKQHSDPALNPR   | MTRFSE | -32.53  |
| >gi 4507907 ref NP_000543 | 578 | QHSDPCALNPRMTR  | FSEEAC | -0.743  |
| >gi 4507907 ref NP_000543 | 597 | CAVLTSPTFEACHR  | AVSPLP | -35.854 |
| >gi 4507907 ref NP_000543 | 606 | EACHRAVSPLPYLR  | NCRYDV | -30.042 |
| >gi 4507907 ref NP_000543 | 609 | HRAVSPLPYLRNCR  | YDVCSC | -22.536 |
| >gi 4507907 ref NP_000543 | 619 | RNCRYDVCSCSDGR  | ECLCGA | -41.518 |
| >gi 4507907 ref NP_000543 | 636 | CGALASYAAACAGR  | GVRVAW | -26.368 |
| >gi 4507907 ref NP_000543 | 639 | LASYAAACAGRGRV  | VAWREP | -18.043 |

|                           |      |                 |        |         |
|---------------------------|------|-----------------|--------|---------|
| >gi 4507907 ref NP_000543 | 643  | AAACAGRGVVRVAWR | EPGRCE | -17.881 |
| >gi 4507907 ref NP_000543 | 647  | AGRGVVRVAWREPGR | CELNCP | -34.854 |
| >gi 4507907 ref NP_000543 | 670  | VYLQCGTPCNLTCR  | SLSYPD | -33.478 |
| >gi 4507907 ref NP_000543 | 698  | EGCFCPPGLYMDER  | GDCVPK | -45.086 |
| >gi 4507907 ref NP_000543 | 760  | LLPDAVLSSPLSHR  | SKRSLS | -21.045 |
| >gi 4507907 ref NP_000543 | 768  | SPLSHRSKRSLSCR  | PPMVKL | -24.753 |
| >gi 4507907 ref NP_000543 | 782  | PPMVKLVCPADNLR  | AEGLEC | -34.616 |
| >gi 4507907 ref NP_000543 | 816  | GCVSGCLCPPGMVR  | HENRCV | -33.809 |
| >gi 4507907 ref NP_000543 | 820  | GCLCPPGMVRHENR  | CVALER | -16.95  |
| >gi 4507907 ref NP_000543 | 826  | GMVRHENRCVALER  | CPCFHQ | -40.696 |
| >gi 4507907 ref NP_000543 | 852  | GETVKIGCNTCVCR  | DRKWNC | -36.485 |
| >gi 4507907 ref NP_000543 | 854  | TVKIGCNTCVCRDR  | KWNCTD | -44.319 |
| >gi 4507907 ref NP_000543 | 906  | LVQDYCGSNPGTFR  | ILVGNK | -36.941 |
| >gi 4507907 ref NP_000543 | 924  | NKGCSPSVKCKKR   | VTILVE | -18.85  |
| >gi 4507907 ref NP_000543 | 945  | GEIELFDGEVNVKR  | PMKDET | -31.745 |
| >gi 4507907 ref NP_000543 | 960  | MKDETHFEVVESGR  | YIILL  | -33.054 |
| >gi 4507907 ref NP_000543 | 976  | ILLGKALSVVWDR   | HLSISV | -31.672 |
| >gi 4507907 ref NP_000543 | 1035 | GNSWKVSSQCADTR  | KVPLDS | -38.278 |
| >gi 4507907 ref NP_000543 | 1061 | NNIMKQTMVDSSCR  | ILTSDV | -43.603 |
| >gi 4507907 ref NP_000543 | 1121 | AHVCAQHGVVVTWR  | TATLCP | -22.565 |
| >gi 4507907 ref NP_000543 | 1133 | WRTATLCPQSCEER  | NLRENG | -36.944 |
| >gi 4507907 ref NP_000543 | 1136 | ATLCPQSCEERNLR  | ENGYEC | -12.083 |
| >gi 4507907 ref NP_000543 | 1145 | ERNLRENGYECEWR  | YNSCAP | -42.827 |
| >gi 4507907 ref NP_000543 | 1204 | VPEDCPVCEVAGR   | RFASGK | -39.365 |
| >gi 4507907 ref NP_000543 | 1205 | DPEDCPVCEVAGR   | FASGKK | -20.188 |
| >gi 4507907 ref NP_000543 | 1274 | DISEPPLHDFYCSR  | LLDLVF | -45.728 |
| >gi 4507907 ref NP_000543 | 1287 | RLLDLVFLLDGSSR  | LSEAEF | -37.883 |
| >gi 4507907 ref NP_000543 | 1306 | FEVLKAFVVDMMER  | LRISQK | -48.791 |
| >gi 4507907 ref NP_000543 | 1308 | VLKAFVVDMMERLR  | ISQKWV | -39.399 |
| >gi 4507907 ref NP_000543 | 1315 | DMMERLRISQKWVR  | VAVVEY | -25.368 |
| >gi 4507907 ref NP_000543 | 1334 | YHDGSHAYIGLKDR  | KRPSEL | -38.232 |
| >gi 4507907 ref NP_000543 | 1336 | DGSHAYIGLKDRKR  | PSELRR | -15.101 |
| >gi 4507907 ref NP_000543 | 1341 | YIGLKDRKRPSELR  | RIASQV | -22.529 |
| >gi 4507907 ref NP_000543 | 1342 | IGLKDRKRPSELRR  | IASQVK | -19.778 |
| >gi 4507907 ref NP_000543 | 1374 | LKYTLFQIFSKIDR  | PEASRI | -35.894 |
| >gi 4507907 ref NP_000543 | 1379 | FQIFSKIDRPEASR  | IALLM  | -30.128 |
| >gi 4507907 ref NP_000543 | 1392 | RIALLMASQEPQR   | MSRNFV | -32.681 |
| >gi 4507907 ref NP_000543 | 1395 | LLMASQEPQRMSR   | NFVRYV | -6.608  |
| >gi 4507907 ref NP_000543 | 1399 | ASQEPQRMSRNFVR  | YVQGLK | -18.967 |
| >gi 4507907 ref NP_000543 | 1426 | PVGIGPHANLKQIR  | LIEKQA | -28.574 |
| >gi 4507907 ref NP_000543 | 1450 | AFVLSSVDELEQQR  | DEIVSY | -42.961 |
| >gi 4507907 ref NP_000543 | 1492 | GPGLLGVSTLGPKR  | NSMVLD | -18.782 |
| >gi 4507907 ref NP_000543 | 1516 | LEGSKDIGEADFNR  | SKEFME | -38.268 |

|                           |      |                 |         |         |
|---------------------------|------|-----------------|---------|---------|
| >gi 4507907 ref NP_000543 | 1527 | FNRSKEFMEEVIQR  | MDVGQD  | -35.966 |
| >gi 4507907 ref NP_000543 | 1564 | PFSEAQSKGDILQR  | VREIRY  | -33.693 |
| >gi 4507907 ref NP_000543 | 1566 | SEAQSKGDILQVR   | EIRYQG  | -26.734 |
| >gi 4507907 ref NP_000543 | 1569 | QSKGDILQVRREIR  | YQGGNR  | -14.206 |
| >gi 4507907 ref NP_000543 | 1575 | LQRVREIRYQGGNR  | TNTGLA  | -36.159 |
| >gi 4507907 ref NP_000543 | 1583 | YQGGNRTNTGLALR  | YLS DHS | -25.054 |
| >gi 4507907 ref NP_000543 | 1597 | YLS DHSFLVSQGDR | EQAPNL  | -34.163 |
| >gi 4507907 ref NP_000543 | 1618 | YMVTGNPASDEIKR  | LPGDIQ  | -32.408 |
| >gi 4507907 ref NP_000543 | 1641 | IGVGPANVQELER   | IGWPNA  | -48.952 |
| >gi 4507907 ref NP_000543 | 1659 | NAPILIQDFETLPR  | EAPDLV  | -30.782 |
| >gi 4507907 ref NP_000543 | 1668 | ETLPREAPDLVLQR  | CCSGEG  | -28.604 |
| >gi 4507907 ref NP_000543 | 1726 | FAKAFISKANIGPR  | LTQVSV  | -25.811 |
| >gi 4507907 ref NP_000543 | 1763 | EKAHLLSLVDVMQR  | EGGPSQ  | -29.966 |
| >gi 4507907 ref NP_000543 | 1779 | GPSIQDALGFAVR   | YLTSEM  | -28.356 |
| >gi 4507907 ref NP_000543 | 1789 | FAVRYLTSEMHGAR  | PGASKA  | -23.118 |
| >gi 4507907 ref NP_000543 | 1816 | VSVDSVDAADAAR   | SNRVTV  | -28.08  |
| >gi 4507907 ref NP_000543 | 1819 | DSVDAADAARSNR   | VTVFPI  | -16.626 |
| >gi 4507907 ref NP_000543 | 1830 | SNRVTVFPIGIGDR  | YDAAQL  | -39.211 |
| >gi 4507907 ref NP_000543 | 1837 | PIGIGDRYDAAQLR  | ILAGPA  | -36.191 |
| >gi 4507907 ref NP_000543 | 1853 | AGPAGDSNVVKLQR  | IEDLPT  | -28.102 |
| >gi 4507907 ref NP_000543 | 1877 | GNSFLHKLCSGFVR  | ICMDED  | -40.218 |
| >gi 4507907 ref NP_000543 | 1888 | FVRICMDEDGNEKR  | PGDVWT  | -28.037 |
| >gi 4507907 ref NP_000543 | 1916 | TCQPDGQTLLKSHR  | VNCDRG  | -21.506 |
| >gi 4507907 ref NP_000543 | 1921 | GQTLLKSHRVNCDR  | GLRPSC  | -31.232 |
| >gi 4507907 ref NP_000543 | 1924 | LLKSHRVNCDRGLR  | PSCPNS  | -25.243 |
| >gi 4507907 ref NP_000543 | 1943 | SQSPVKEETCGCR   | WTCPCV  | -47.52  |
| >gi 4507907 ref NP_000543 | 1956 | RWTCPVCTGSSTR   | HIVTFD  | -26.166 |
| >gi 4507907 ref NP_000543 | 1998 | EVILHNGACSPGAR  | QGCMKS  | -33.952 |
| >gi 4507907 ref NP_000543 | 2027 | VELHSDMEVTVNGR  | LVSVPY  | -28.489 |
| >gi 4507907 ref NP_000543 | 2051 | MEVNVYGAIMHEVR  | FNHLGH  | -32.194 |
| >gi 4507907 ref NP_000543 | 2099 | GICDENGANDFMLR  | DGTVTT  | -37.313 |
| >gi 4507907 ref NP_000543 | 2118 | TDWKTLVQEWTVQR  | PGQTCQ  | -42.391 |
| >gi 4507907 ref NP_000543 | 2185 | QVCEVIASYAHLR   | TNGVCV  | -35.808 |
| >gi 4507907 ref NP_000543 | 2194 | AHLCRTNGVCVDWR  | TPDFCA  | -40.519 |
| >gi 4507907 ref NP_000543 | 2218 | PSLVYHCEHGCP    | HCDGNV  | -37.877 |
| >gi 4507907 ref NP_000543 | 2287 | DHQPCQICTCLSGR  | KVNCTT  | -33.323 |
| >gi 4507907 ref NP_000543 | 2311 | TAKAPTCGLCEVAR  | LRQNAD  | -39.526 |
| >gi 4507907 ref NP_000543 | 2313 | KAPTCGLCEVARLR  | QNADQC  | -32.901 |
| >gi 4507907 ref NP_000543 | 2342 | PVSCDLPPVPHCER  | GLQPTL  | -33.249 |
| >gi 4507907 ref NP_000543 | 2355 | RGLQPTLTNPGEER  | PNFTCA  | -38.88  |
| >gi 4507907 ref NP_000543 | 2363 | NPGEERPNFTCACR  | KEECKR  | -41.706 |
| >gi 4507907 ref NP_000543 | 2369 | PNFTCACRKEECKR  | VSPPSC  | -29.021 |
| >gi 4507907 ref NP_000543 | 2379 | ECKRVSPSPCPHR   | LPTLRK  | -34.435 |

|                           |      |                 |        |         |
|---------------------------|------|-----------------|--------|---------|
| >gi 4507907 ref NP_000543 | 2384 | SPPSCPPHRLPTLR  | KTQCCD | -23.03  |
| >gi 4507907 ref NP_000543 | 2434 | TTTTCLPDKVCVHR  | STIYPV | -17.957 |
| >gi 4507907 ref NP_000543 | 2464 | CTCTDMEDAVMGLR  | VAQCSQ | -30.606 |
| >gi 4507907 ref NP_000543 | 2478 | VAQCSQKPCEDSCR  | SGFTYV | -47.817 |
| >gi 4507907 ref NP_000543 | 2493 | GFTYVLHEGECCGR  | CLPSAC | -38.319 |
| >gi 4507907 ref NP_000543 | 2507 | CLPSACEVVTGSPR  | GDSQSS | -25.305 |
| >gi 4507907 ref NP_000543 | 2535 | ASPENPCLINECVR  | VKEEVF | -43.832 |
| >gi 4507907 ref NP_000543 | 2545 | ECVRVKEEVFIQQR  | NVSCPQ | -19.312 |
| >gi 4507907 ref NP_000543 | 2575 | QLSCKTSACCPSCR  | CERMEA | -43.917 |
| >gi 4507907 ref NP_000543 | 2578 | CKTSACCPSCRCER  | MEACML | -38.421 |
| >gi 4507907 ref NP_000543 | 2604 | PGKTVMIDVCTTCR  | CMVQVG | -44.45  |
| >gi 4507907 ref NP_000543 | 2620 | VQVGVISGFKLECR  | KTTCNP | -36.7   |
| >gi 4507907 ref NP_000543 | 2643 | GYKEENNTGECCGR  | CLPTAC | -37.132 |
| >gi 4507907 ref NP_000543 | 2654 | CGRCLPTACTIQLR  | GGQIMT | -28.217 |
| >gi 4507907 ref NP_000543 | 2663 | TIQLRGGQIMTLKR  | DETLQD | -28.611 |
| >gi 4507907 ref NP_000543 | 2681 | QDGCDFHCKVNER   | GEYFWE | -36.222 |
| >gi 4507907 ref NP_000543 | 2689 | CKVNERGEYFWEKR  | VTGCPP | -27.002 |
| >gi 4507907 ref NP_000543 | 2730 | DTCEEPECNDITAR  | LQYVKV | -33.549 |
| >gi 4507907 ref NP_000543 | 2778 | NDVQDQCSCSPTR   | TEPMQV | -37.803 |
| >gi 4507907 ref NP_000543 | 2809 | HEVLNAMECKCSPR  | KCSK-- | -31.48  |
| >gi 125484 sp P08581.3 ME | 21   | APGILVLLFTLVQR  | SNGECK | -29.13  |
| >gi 125484 sp P08581.3 ME | 138  | YYDDQLISCGSVNR  | GTCQRH | -32.661 |
| >gi 125484 sp P08581.3 ME | 143  | LISCGSVNRGTCQR  | HVFPHN | -25.21  |
| >gi 125484 sp P08581.3 ME | 191  | SALGAKVLSSVKDR  | FINFFV | -25.49  |
| >gi 125484 sp P08581.3 ME | 217  | SYFPDHPLHSISVR  | RLKETK | -6.7    |
| >gi 125484 sp P08581.3 ME | 218  | YFPDHPLHSISVRR  | LKETKD | -22.166 |
| >gi 125484 sp P08581.3 ME | 242  | LTDQSYIDVLPEFR  | DSYPIK | -31.513 |
| >gi 125484 sp P08581.3 ME | 266  | FESNNFIYFLTVQR  | ETLDAQ | -28.394 |
| >gi 125484 sp P08581.3 ME | 277  | VQRETLDQAQTFHTR | IIRFCS | -35.581 |
| >gi 125484 sp P08581.3 ME | 280  | ETLDAQTFHTRIIR  | FCSINS | -0.933  |
| >gi 125484 sp P08581.3 ME | 304  | YMEMPLCILTEKR   | KKRSTK | -29.616 |
| >gi 125484 sp P08581.3 ME | 331  | QAAYVSKPGAQLAR  | QIGASL | -20.415 |
| >gi 125484 sp P08581.3 ME | 359  | FAQSKPDSAEPMDR  | SAMCAF | -35.997 |
| >gi 125484 sp P08581.3 ME | 384  | NDFFNKIVNKNNVR  | CLQHFY | -23.844 |
| >gi 125484 sp P08581.3 ME | 400  | QHFYGPNEHCENR   | TLLRNS | -38.898 |
| >gi 125484 sp P08581.3 ME | 404  | GPNHEHCENRLLR   | NSSGCE | -19.513 |
| >gi 125484 sp P08581.3 ME | 412  | NRTLLRNSSGCEAR  | RDEYRT | -28.042 |
| >gi 125484 sp P08581.3 ME | 413  | RTLLRNSSGCEARR  | DEYRTE | -30.533 |
| >gi 125484 sp P08581.3 ME | 417  | RNSSGCEARRDEYR  | TEFTTA | -31.293 |
| >gi 125484 sp P08581.3 ME | 426  | RDEYRTEFTTALQR  | VDLFMG | -33.517 |
| >gi 125484 sp P08581.3 ME | 461  | GDLTIANLGTSEGR  | FMQVVV | -35.662 |
| >gi 125484 sp P08581.3 ME | 469  | GTSEGRFMQVVVSR  | SGPSTP | -19.721 |
| >gi 125484 sp P08581.3 ME | 521  | KKITKIPLNGLGCR  | HFQSCS | -37.803 |



|                           |      |                |         |         |
|---------------------------|------|----------------|---------|---------|
| >gi 125484 sp P08581.3 ME | 547  | PFVQCGWCHDKCVR | SEECLS  | -31.173 |
| >gi 125484 sp P08581.3 ME | 580  | KVFPNSAPLEGGTR | LTICGW  | -39.748 |
| >gi 125484 sp P08581.3 ME | 591  | GTRLTICGWDFGFR | RNNKFD  | -43.221 |
| >gi 125484 sp P08581.3 ME | 592  | TRLTICGWDFGFRR | NNKFDL  | -27.014 |
| >gi 125484 sp P08581.3 ME | 602  | GFRRNNKFDLKKTR | VLLGNE  | -26.356 |
| >gi 125484 sp P08581.3 ME | 688  | LTLTGNYLNSGNSR | HISIGG  | -29.189 |
| >gi 125484 sp P08581.3 ME | 731  | TEFAVKLKIDLANR | ETSIFS  | -40.434 |
| >gi 125484 sp P08581.3 ME | 739  | IDLANRETSIFSyr | EDPIVY  | -29.293 |
| >gi 125484 sp P08581.3 ME | 774  | TGVGKNLNSVSVPR | MVINVH  | -23.801 |
| >gi 125484 sp P08581.3 ME | 784  | SVPRMVINVHEAGR | NFTVAC  | -33.726 |
| >gi 125484 sp P08581.3 ME | 793  | HEAGRNFVACQHR  | SNSEII  | -23.569 |
| >gi 125484 sp P08581.3 ME | 958  | LLLLLGFLLWKKR  | KQIKDL  | -30.259 |
| >gi 125484 sp P08581.3 ME | 970  | KRKQIKDLGSELVR | YDARVH  | -30.881 |
| >gi 125484 sp P08581.3 ME | 974  | IKDLGSELVRYDAR | VHTPHL  | -33.472 |
| >gi 125484 sp P08581.3 ME | 982  | VRYDARVHTPHLDR | LVSARS  | -31.673 |
| >gi 125484 sp P08581.3 ME | 987  | RVHTPHLDRLVSAR | SVSPTT  | 8.735   |
| >gi 125484 sp P08581.3 ME | 1004 | PTTEMVSNESVDYR | ATFPED  | -34.621 |
| >gi 125484 sp P08581.3 ME | 1022 | EDQFPNSSQNGSCR | QVQYPL  | -30.634 |
| >gi 125484 sp P08581.3 ME | 1086 | PSSLIVHFNEVIGR | GHFGCV  | -34.785 |
| >gi 125484 sp P08581.3 ME | 1114 | DGKKIHCavKSLNR | ITDIGE  | -28.069 |
| >gi 125484 sp P08581.3 ME | 1148 | SHPNVLSLLGICLR | SEGSPPL | -28.556 |
| >gi 125484 sp P08581.3 ME | 1166 | PLVVLPYMKHGDLR | NFIRNE  | -30.133 |
| >gi 125484 sp P08581.3 ME | 1170 | LPYMKHGDLRNFIR | NETHNP  | -29.963 |
| >gi 125484 sp P08581.3 ME | 1203 | KGMKYLASKKFVHR | DLAARN  | -14.384 |
| >gi 125484 sp P08581.3 ME | 1208 | LASKKFVHRDLAAR | NCMLDE  | -18.651 |
| >gi 125484 sp P08581.3 ME | 1227 | EKFTVKVADFLAR  | DMYDKE  | -38.565 |
| >gi 125484 sp P08581.3 ME | 1279 | VWSFGVVLWELMTR | GAPPYP  | -37.707 |
| >gi 125484 sp P08581.3 ME | 1300 | VNTFDITVYLLQGR | RLLQPE  | -30.441 |
| >gi 125484 sp P08581.3 ME | 1301 | NTFDITVYLLQGRR | LLQPEY  | -20.631 |
| >gi 125484 sp P08581.3 ME | 1327 | EVMLKCWHPKAEMR | PSFSEL  | -27.518 |
| >gi 125484 sp P08581.3 ME | 1336 | KAEMRPSFSELVSR | ISAIFS  | -35.462 |
| >gi 125484 sp P08581.3 ME | 1382 | LSSDNADDEVDR   | PASFWE  | -39.189 |
| >gi 33112647 sp P06213.2  | 41   | HLYPGEVCPGMDIR | NNLTRL  | -37.693 |
| >gi 33112647 sp P06213.2  | 46   | EVCPGMDIRNNLTR | LHELEN  | -32.958 |
| >gi 33112647 sp P06213.2  | 69   | IEGHLQILLMFKTR | PEDFRD  | -35.425 |
| >gi 33112647 sp P06213.2  | 74   | QILLMFKTRPEDFR | DLSFPK  | -30.325 |
| >gi 33112647 sp P06213.2  | 92   | PKLIMITDYLLLFR | VYGLES  | -39.678 |
| >gi 33112647 sp P06213.2  | 110  | ESLKDLFPNLTvir | GSRLFF  | -30.579 |
| >gi 33112647 sp P06213.2  | 113  | KDLFPNLTvirGSR | LFFNYA  | -23.416 |
| >gi 33112647 sp P06213.2  | 141  | LKELGLYNLMNITR | GSVRIE  | -27.061 |
| >gi 33112647 sp P06213.2  | 145  | GLYNLMNITRGSVR | IEKNNE  | -30.6   |
| >gi 33112647 sp P06213.2  | 162  | NNELCYLATIDWSR | ILDSVE  | -37.748 |
| >gi 33112647 sp P06213.2  | 208  | NCPATVINGQFVER | CWTHSH  | -38.952 |

|                          |     |                 |        |         |
|--------------------------|-----|-----------------|--------|---------|
| >gi 33112647 sp P06213.2 | 256 | CSQPDDPTKCVACR  | NFYLDG | -31.833 |
| >gi 33112647 sp P06213.2 | 263 | TKCVACRNFYLDGR  | CVETCP | -36.164 |
| >gi 33112647 sp P06213.2 | 279 | ETCPPPYHFDQWR   | CVNFSF | -31.852 |
| >gi 33112647 sp P06213.2 | 297 | SFCQDLHHKCKNSR  | RQGCHQ | -23.508 |
| >gi 33112647 sp P06213.2 | 298 | FCQDLHHKCKNSRR  | QGCHQY | -19.405 |
| >gi 33112647 sp P06213.2 | 358 | EKTIDSVTSAQELR  | GCTVIN | -25.092 |
| >gi 33112647 sp P06213.2 | 372 | GCTVINGSLIINIR  | GGNNLA | -25.789 |
| >gi 33112647 sp P06213.2 | 398 | LGLIEEISGYLKIR  | RSYALV | -33.682 |
| >gi 33112647 sp P06213.2 | 399 | GLIEEISGYLKIRR  | SYALVS | -0.737  |
| >gi 33112647 sp P06213.2 | 410 | IRRYALVSLSFFR   | KLRLIR | -37.085 |
| >gi 33112647 sp P06213.2 | 413 | SYALVSLSFFRKLRL | LIRGET | -21.283 |
| >gi 33112647 sp P06213.2 | 416 | LVLSFFRKLRLIR   | GETLEI | -2.592  |
| >gi 33112647 sp P06213.2 | 436 | GNYSFYALDNQNLRL | QLWDWS | -31.87  |
| >gi 33112647 sp P06213.2 | 478 | EIHKMEEVSGTKGR  | QERNDI | -29.989 |
| >gi 33112647 sp P06213.2 | 481 | KMEEVSGTKGRQER  | NDIALK | -15.053 |
| >gi 33112647 sp P06213.2 | 506 | ASCENELLKFSYIR  | TSFDKI | -32.897 |
| >gi 33112647 sp P06213.2 | 515 | FSYIRTSFDKILLR  | WEPYWP | -31.213 |
| >gi 33112647 sp P06213.2 | 525 | ILLRWEPYWPPDFR  | DLLGFM | -39.169 |
| >gi 33112647 sp P06213.2 | 566 | SNSWTVVDIDPPLR  | SNDPKS | -37.577 |
| >gi 33112647 sp P06213.2 | 581 | NDPKSQNHGWLMLR  | GLKPWT | -25.611 |
| >gi 33112647 sp P06213.2 | 603 | AIFVKTLVTFSDER  | RTYGAK | -43.437 |
| >gi 33112647 sp P06213.2 | 604 | IFVKTLVTFSDERR  | TYGAKS | -35.603 |
| >gi 33112647 sp P06213.2 | 661 | PNGNITHYLVFWER  | QAEDSE | -35.558 |
| >gi 33112647 sp P06213.2 | 683 | ELDYLCKGLKPSR   | TWSPPF | -20.078 |
| >gi 33112647 sp P06213.2 | 729 | DSQILKELEESSFR  | KTFEDY | -45.534 |
| >gi 33112647 sp P06213.2 | 744 | TFEDYLHNVVFPVPR | KTSSGT | -29.97  |
| >gi 33112647 sp P06213.2 | 756 | PRKTSSGTGAEDPR  | PSRKRR | -34.028 |
| >gi 33112647 sp P06213.2 | 759 | TSSGTGAEDPRPSR  | KRRSLG | -25.26  |
| >gi 33112647 sp P06213.2 | 761 | SGTGAEDPRPSRKR  | RSLGDV | -12.592 |
| >gi 33112647 sp P06213.2 | 796 | TSSTSVPTSPEEHR  | PFEKVV | -34.325 |
| >gi 33112647 sp P06213.2 | 813 | KVVNKESLVISGLR  | HFTGYR | -31.186 |
| >gi 33112647 sp P06213.2 | 819 | SLVISGLRHFTGYR  | IELQAC | -42.749 |
| >gi 33112647 sp P06213.2 | 833 | IELQACNQDTPEER  | CSVAAY | -43.384 |
| >gi 33112647 sp P06213.2 | 843 | PEERCSVAAYVSAR  | TMPEAK | -34.962 |
| >gi 33112647 sp P06213.2 | 889 | EPNGLIVLYEVSYSR | RYGDEE | -40.033 |
| >gi 33112647 sp P06213.2 | 890 | PNGLIVLYEVSYSRR | YGDEEL | -27.827 |
| >gi 33112647 sp P06213.2 | 902 | RRYGDEELHLCVSR  | KHFALE | -34.149 |
| >gi 33112647 sp P06213.2 | 909 | LHLCVSRKHFALER  | GCRLRG | -34.391 |
| >gi 33112647 sp P06213.2 | 912 | CVSRKHFALERGCR  | LRGLSP | -30.131 |
| >gi 33112647 sp P06213.2 | 914 | SRKHFALERGCRLR  | GLSPGN | -15.851 |
| >gi 33112647 sp P06213.2 | 924 | CRLRGLSPGNYSVR  | IRATSL | -34.493 |
| >gi 33112647 sp P06213.2 | 926 | LRGLSPGNYSVRIR  | ATSLAG | -21.941 |
| >gi 33112647 sp P06213.2 | 980 | LFSVVIGSIYFLRL  | KRQPDG | -35.923 |

|                           |      |                 |        |         |
|---------------------------|------|-----------------|--------|---------|
| >gi 33112647 sp P06213.2  | 982  | SVVIGSIYLF LRKR | QPDGPL | -18.528 |
| >gi 33112647 sp P06213.2  | 1020 | PCSVYVPDEWEVSR  | EKITLL | -44.741 |
| >gi 33112647 sp P06213.2  | 1027 | DEWEVSREKITLLR  | ELGQGS | -17.077 |
| >gi 33112647 sp P06213.2  | 1043 | GQGSFGMVYEGNAR  | DIIKGE | -32.749 |
| >gi 33112647 sp P06213.2  | 1053 | GNARDIIKGEAETR  | VAVKTV | -37.161 |
| >gi 33112647 sp P06213.2  | 1066 | RVAVKTVNESASLR  | ERIEFL | -32.292 |
| >gi 33112647 sp P06213.2  | 1068 | AVKTVNESASLRER  | IEFLNE | -38.484 |
| >gi 33112647 sp P06213.2  | 1088 | ASVMKGFTCHHVVR  | LLGVVS | -32.177 |
| >gi 33112647 sp P06213.2  | 1116 | MELMAHGDLKSYLR  | SLRPEA | -19.008 |
| >gi 33112647 sp P06213.2  | 1119 | MAHGDLKSYLRSLR  | PEAENN | -4.518  |
| >gi 33112647 sp P06213.2  | 1128 | LRSLRPEAENNPGR  | PPPTLQ | -37.939 |
| >gi 33112647 sp P06213.2  | 1158 | DGMAYLNAKKFVHR  | DLAARN | -14.703 |
| >gi 33112647 sp P06213.2  | 1163 | LNAKKFVHRDLAAR  | NCMVAH | -18.904 |
| >gi 33112647 sp P06213.2  | 1182 | HDFTVKIGDFGMTR  | DIYETD | -35.288 |
| >gi 33112647 sp P06213.2  | 1191 | FGMTRDIYETDYR   | KGGKGL | -49.284 |
| >gi 33112647 sp P06213.2  | 1201 | DYYRKGGKGLLPVR  | WMAPES | -40.368 |
| >gi 33112647 sp P06213.2  | 1264 | DGGYLDQPDNCPER  | VTDLMR | -48.128 |
| >gi 33112647 sp P06213.2  | 1270 | QPDNCPERVTDLMR  | MCWQFN | -43.752 |
| >gi 33112647 sp P06213.2  | 1280 | DLMRMCWQFNPKMR  | PTFLEI | -34.757 |
| >gi 33112647 sp P06213.2  | 1331 | EMEFEDMENVPLDR  | SSHCQR | -30.643 |
| >gi 33112647 sp P06213.2  | 1337 | MENVPLDRSSHQR   | EEAGGR | -28.314 |
| >gi 33112647 sp P06213.2  | 1343 | DRSSHQRREEAGGR  | DGGSSL | -40.6   |
| >gi 33112647 sp P06213.2  | 1353 | AGGRDGGSSLGFKR  | SYEEHI | -20.542 |
| >gi 33112647 sp P06213.2  | 1372 | IPYTHMNGGKKNR   | ILTLPR | -19.581 |
| >gi 33112647 sp P06213.2  | 1378 | NGGKKNRILTLPR   | SNPS-- | -28.017 |
| >gi 1708865 sp Q07954.1 L | 35   | DAPKTCSPKQFACR  | DQITCI | -29.55  |
| >gi 1708865 sp Q07954.1 L | 46   | ACRDQITCISKGWR  | CDGERD | -29.147 |
| >gi 1708865 sp Q07954.1 L | 51   | ITCISKGWRCDGER  | DCPDGS | -41.012 |
| >gi 1708865 sp Q07954.1 L | 71   | DEAPEICPQSKAQR  | CQPNEH | -8.922  |
| >gi 1708865 sp Q07954.1 L | 90   | HNCLGTELCVPMSR  | LCNGVQ | -38.954 |
| >gi 1708865 sp Q07954.1 L | 109  | QDCMDGSDEGPHCR  | ELQGNC | -34.496 |
| >gi 1708865 sp Q07954.1 L | 117  | EGPHCRELQGNCNR  | LGCQHH | -38.609 |
| >gi 1708865 sp Q07954.1 L | 186  | CGCVEGYLLQPDNR  | SCKAKN | -33.951 |
| >gi 1708865 sp Q07954.1 L | 197  | DNRSCAKNEPVDR   | PPVLLI | -44.851 |
| >gi 1708865 sp Q07954.1 L | 228  | SGAQVSTITPTSTR  | QTTAMD | -24.969 |
| >gi 1708865 sp Q07954.1 L | 260  | VGDSAAQTQLKCAR  | MPGLKG | -24.756 |
| >gi 1708865 sp Q07954.1 L | 303  | LTGNFYFVDDIDDR  | IFVCNR | -60.955 |
| >gi 1708865 sp Q07954.1 L | 309  | FVDDIDDRIFVCNR  | NGDTCV | -37.823 |
| >gi 1708865 sp Q07954.1 L | 350  | VFFTDYGGQIPKVER | CDMDGQ | -32.238 |
| >gi 1708865 sp Q07954.1 L | 358  | IPKVERCDMDGQNR  | TKLVDS | -38.574 |
| >gi 1708865 sp Q07954.1 L | 379  | IVFPHGITLDLVS   | LVYWAD | -39.502 |
| >gi 1708865 sp Q07954.1 L | 401  | LDYIEVVDYEGKGR  | QTIIQG | -33.021 |
| >gi 1708865 sp Q07954.1 L | 441  | SDNANAQQKTSVIR  | VNRFNS | -29.355 |

|                           |     |                |         |         |
|---------------------------|-----|----------------|---------|---------|
| >gi 1708865 sp Q07954.1 L | 444 | ANAQQKTSVIRVNR | FNSTEY  | 3.427   |
| >gi 1708865 sp Q07954.1 L | 455 | VNRFNSTEYQVVTR | VDKGGGA | -30.83  |
| >gi 1708865 sp Q07954.1 L | 468 | RVDKGGALHIYHQR | RQPRVR  | -27.041 |
| >gi 1708865 sp Q07954.1 L | 469 | VDKGGALHIYHQRR | QPRVRS  | -8.865  |
| >gi 1708865 sp Q07954.1 L | 472 | GGALHIYHQRQPR  | VRSHAC  | -13.975 |
| >gi 1708865 sp Q07954.1 L | 474 | ALHIYHQRQPRVR  | SHACEN  | -22.224 |
| >gi 1708865 sp Q07954.1 L | 502 | CSDICLLANSHKAR | TCRCRS  | -16.575 |
| >gi 1708865 sp Q07954.1 L | 505 | ICLLANSHKARTCR | CRSGFS  | -14.315 |
| >gi 1708865 sp Q07954.1 L | 507 | LLANSHKARTCRCR | SGFSLG  | -23.149 |
| >gi 1708865 sp Q07954.1 L | 534 | KPEHELFLVYGKGR | PGIIRG  | -37.167 |
| >gi 1708865 sp Q07954.1 L | 539 | LFLVYGKGRPGIIR | GMDMGA  | -30.456 |
| >gi 1708865 sp Q07954.1 L | 562 | DEHMIPIENLMNPR | ALDFHA  | -24.334 |
| >gi 1708865 sp Q07954.1 L | 585 | FIYFADTTSYLIGR | QKIDGT  | -34.612 |
| >gi 1708865 sp Q07954.1 L | 593 | SYLIGRQKIDGTER | ETILKD  | -44.827 |
| >gi 1708865 sp Q07954.1 L | 631 | WTDDGPKKTISVAR | LEKAAQ  | -35.471 |
| >gi 1708865 sp Q07954.1 L | 639 | TISVARLEKAAQTR | KTLIEG  | -25.338 |
| >gi 1708865 sp Q07954.1 L | 651 | TRKTLIEGKMTHPR | AIVVDP  | -20.702 |
| >gi 1708865 sp Q07954.1 L | 675 | MYWTDWEEDPKDSR | RGRLER  | -30.647 |
| >gi 1708865 sp Q07954.1 L | 676 | YWTDWEEDPKDSRR | GRLERA  | -13.924 |
| >gi 1708865 sp Q07954.1 L | 678 | TDWEEDPKDSRRGR | LERAWM  | -25.741 |
| >gi 1708865 sp Q07954.1 L | 681 | EEDPKDSRRGRLER | AWMDGS  | -15.684 |
| >gi 1708865 sp Q07954.1 L | 689 | RGRLERAWMDGSHR | DIFVTS  | -31.737 |
| >gi 1708865 sp Q07954.1 L | 712 | LWPNGLSLDIPAGR | LYWVDA  | -42.352 |
| >gi 1708865 sp Q07954.1 L | 722 | PAGRLYWVDAFYDR | IETILL  | -51.361 |
| >gi 1708865 sp Q07954.1 L | 733 | YDRIETILLNGTDR | KIVYEG  | -40.72  |
| >gi 1708865 sp Q07954.1 L | 761 | LCHHGNYLFWTEYR | SGSVYR  | -39.899 |
| >gi 1708865 sp Q07954.1 L | 767 | YLFWTEYRSGSVYR | LERGVG  | -37.092 |
| >gi 1708865 sp Q07954.1 L | 770 | WTEYRSGSVYRLER | GVGGAP  | -21.34  |
| >gi 1708865 sp Q07954.1 L | 783 | RGVGGAPPTVTLR  | SERPPI  | -28.463 |
| >gi 1708865 sp Q07954.1 L | 786 | GGAPPTVTLRSER  | PPIFEI  | -21.009 |
| >gi 1708865 sp Q07954.1 L | 793 | TLLRSERPPIFEIR | MYDAQQ  | -37.96  |
| >gi 1708865 sp Q07954.1 L | 808 | YDAQQQVGTNKCR  | VNNGGC  | -37.167 |
| >gi 1708865 sp Q07954.1 L | 825 | GGCSSLCLATPGSR | QCACAE  | -31.122 |
| >gi 1708865 sp Q07954.1 L | 865 | PQCQPGEFACANSR | CIQERW  | -33.659 |
| >gi 1708865 sp Q07954.1 L | 870 | GEFACANSRCIQER | WKCDGD  | -33.143 |
| >gi 1708865 sp Q07954.1 L | 899 | APALCHQHCTPSDR | FKCENN  | -39.103 |
| >gi 1708865 sp Q07954.1 L | 906 | HTCPSDRFKCENNR | CIPNRW  | -32.797 |
| >gi 1708865 sp Q07954.1 L | 911 | DRFKCENNRIPNR  | WLCDGD  | -26.199 |
| >gi 1708865 sp Q07954.1 L | 934 | GNSEDESATCSAR  | TCPPNQ  | -31.711 |
| >gi 1708865 sp Q07954.1 L | 947 | RTCPPNQFSCASGR | CIPISW  | -32.343 |
| >gi 1708865 sp Q07954.1 L | 964 | ISWTCDLDDDCGDR | SDESAS  | -54.164 |
| >gi 1708865 sp Q07954.1 L | 988 | TCFPLTQFTCNNGR | CININW  | -35.922 |
| >gi 1708865 sp Q07954.1 L | 995 | FTCNNGRCININWR | CDNDND  | -32.902 |

|                           |      |                 |        |         |
|---------------------------|------|-----------------|--------|---------|
| >gi 1708865 sp Q07954.1 L | 1026 | HSCSSTQFKCNSGR  | CIPEHW | -28.291 |
| >gi 1708865 sp Q07954.1 L | 1057 | SDETHANCTNQATR  | PPGGCH | -26.854 |
| >gi 1708865 sp Q07954.1 L | 1070 | RPPGGCHTDEFQCR  | LDGLCI | -52.146 |
| >gi 1708865 sp Q07954.1 L | 1079 | EFQCRLDGLCIPLR  | WRCDGD | -35.435 |
| >gi 1708865 sp Q07954.1 L | 1081 | QCRLDGLCIPLRWR  | CDGDTD | -34.091 |
| >gi 1708865 sp Q07954.1 L | 1117 | CDPSVKFGCKDSAR  | CISKAW | -28.778 |
| >gi 1708865 sp Q07954.1 L | 1146 | DNSDEENCESLACR  | PPSHPC | -39.919 |
| >gi 1708865 sp Q07954.1 L | 1262 | YEGWVLEPDGESCR  | SLDPFK | -36.845 |
| >gi 1708865 sp Q07954.1 L | 1276 | SLDPFKPFIFSNR   | HEIRRI | -38.121 |
| >gi 1708865 sp Q07954.1 L | 1280 | FKPFIFSNRHEIR   | RIDLHK | -23.215 |
| >gi 1708865 sp Q07954.1 L | 1281 | KPFIFSNRHEIRR   | IDLHKG | -21.378 |
| >gi 1708865 sp Q07954.1 L | 1297 | LHKGDYSVLPGLR   | NTIALD | -27.613 |
| >gi 1708865 sp Q07954.1 L | 1323 | ALYWTDVVEDKIYR  | GKLLDN | -25.317 |
| >gi 1708865 sp Q07954.1 L | 1378 | LDQIEVAKLDGTLR  | TTLLAG | -37.436 |
| >gi 1708865 sp Q07954.1 L | 1390 | LRTTLLAGDIEHPR  | AIALDP | -34.284 |
| >gi 1708865 sp Q07954.1 L | 1397 | GDIEHPRAIALDPR  | DGILFW | -36.867 |
| >gi 1708865 sp Q07954.1 L | 1412 | GILFWTDWDASLPR  | IEAASM | -43.649 |
| >gi 1708865 sp Q07954.1 L | 1423 | LPRIEAASMSGAGR  | RTVHRE | -30.804 |
| >gi 1708865 sp Q07954.1 L | 1424 | PRIEAASMSGAGRR  | TVHRET | -20.576 |
| >gi 1708865 sp Q07954.1 L | 1428 | AASMSGAGRRTVHR  | ETGSGG | -12.629 |
| >gi 1708865 sp Q07954.1 L | 1447 | GWPNGLTVDYLEKR  | ILWIDA | -37.333 |
| >gi 1708865 sp Q07954.1 L | 1454 | VDYLEKRILWIDAR  | SDAIYS | -28.578 |
| >gi 1708865 sp Q07954.1 L | 1462 | LWIDARSDAIYSAR  | YDGSGH | -24.829 |
| >gi 1708865 sp Q07954.1 L | 1473 | SARYDGSFGHMEVLR | GHEFLS | -34.026 |
| >gi 1708865 sp Q07954.1 L | 1497 | VTLYGGEVYWTDWR  | TNTLAK | -43.445 |
| >gi 1708865 sp Q07954.1 L | 1517 | ANKWTGHNVTVVQR  | TNTQPF | -28.394 |
| >gi 1708865 sp Q07954.1 L | 1532 | NTQPFDLQVYHPSR  | QPMAPN | -19.297 |
| >gi 1708865 sp Q07954.1 L | 1559 | QGPCSHLCLINYNR  | TVSCAC | -34.29  |
| >gi 1708865 sp Q07954.1 L | 1589 | TTCYEFKFKFLLYAR | QMEIRG | -36.282 |
| >gi 1708865 sp Q07954.1 L | 1594 | FKKFLLYARQMEIR  | GVDLDA | -24.646 |
| >gi 1708865 sp Q07954.1 L | 1625 | PDIDNVTVLDYDAR  | EQRVYW | -38.456 |
| >gi 1708865 sp Q07954.1 L | 1628 | DNVTVLDYDAREQR  | VYWSDV | -30.564 |
| >gi 1708865 sp Q07954.1 L | 1635 | YDAREQRVYWSQVDR | TQAIKR | -37.362 |
| >gi 1708865 sp Q07954.1 L | 1641 | RVYWSQVVRTQAIKR | AFINGT | -19.22  |
| >gi 1708865 sp Q07954.1 L | 1670 | LPNAHGLAVDWVSR  | NLFWTS | -34.691 |
| >gi 1708865 sp Q07954.1 L | 1688 | TSYDTNKKQINVAR  | LDGSFK | -32.435 |
| >gi 1708865 sp Q07954.1 L | 1713 | GLEQPGLVVHPLR   | GKLYWT | -12.881 |
| >gi 1708865 sp Q07954.1 L | 1734 | GDNISMANMDGNSNR | TLLFSG | -40.49  |
| >gi 1708865 sp Q07954.1 L | 1768 | KLYWISSGNHTINR  | CNLDGS | -29.928 |
| >gi 1708865 sp Q07954.1 L | 1783 | NLDGSGLEVIDAMR  | SQLGKA | -35.696 |
| >gi 1708865 sp Q07954.1 L | 1824 | TCSKADGSGSVVLR  | NSTTLV | -17.743 |
| >gi 1708865 sp Q07954.1 L | 1869 | DCSQLCLPTSETTR  | SCMCTA | -27.98  |
| >gi 1708865 sp Q07954.1 L | 1880 | TTRSCMCTAGYSLR  | SGQQAC | -22.355 |

|                           |      |                 |        |         |
|---------------------------|------|-----------------|--------|---------|
| >gi 1708865 sp Q07954.1 L | 1902 | VGSFLLYSVHEGIR  | GIPLDP | -34.032 |
| >gi 1708865 sp Q07954.1 L | 1948 | TIYWVDMGLSTISR  | AKRDQT | -25.001 |
| >gi 1708865 sp Q07954.1 L | 1951 | WVDMGLSTISRAKR  | DQTWRE | 5.233   |
| >gi 1708865 sp Q07954.1 L | 1956 | LSTISRAKRDQTR   | EDVVTN | -24.947 |
| >gi 1708865 sp Q07954.1 L | 1966 | QWREDVVTNGIGR   | VEGIAV | -38.694 |
| >gi 1708865 sp Q07954.1 L | 1993 | YWTDQGFVIEVAR   | LNGSFR | -35.65  |
| >gi 1708865 sp Q07954.1 L | 1999 | FDVIEVARLNGSFR  | YVVISQ | -30.029 |
| >gi 1708865 sp Q07954.1 L | 2011 | FRYVVISQGLDKPR  | AITVHP | -25.146 |
| >gi 1708865 sp Q07954.1 L | 2032 | KGFLFWTEWGQYPR  | IERSRL | -39.871 |
| >gi 1708865 sp Q07954.1 L | 2035 | LFWTEWGQYPRIER  | SRLDGT | -20.615 |
| >gi 1708865 sp Q07954.1 L | 2037 | WTEWGQYPRIERSR  | LDGTER | -27.795 |
| >gi 1708865 sp Q07954.1 L | 2043 | YPRIERSRLDGT    | VVLVNV | -45.91  |
| >gi 1708865 sp Q07954.1 L | 2072 | VDYQDGKLYWCDAR  | TDKIER | -38.22  |
| >gi 1708865 sp Q07954.1 L | 2078 | KLYWCDARTDKIER  | IDLETG | -38.352 |
| >gi 1708865 sp Q07954.1 L | 2087 | DKIERIDLETGENR  | EVVLS  | -34.252 |
| >gi 1708865 sp Q07954.1 L | 2113 | SVSVFEDFIYWSDR  | THANGS | -42.843 |
| >gi 1708865 sp Q07954.1 L | 2122 | YWSDRTHANGSIKR  | GSKDNA | -15.314 |
| >gi 1708865 sp Q07954.1 L | 2135 | RGSKDNATDSVPLR  | TGIGVQ | -33.931 |
| >gi 1708865 sp Q07954.1 L | 2150 | GIGVQLKDIKFNR   | DRQKGT | -24.252 |
| >gi 1708865 sp Q07954.1 L | 2152 | GVQLKDIKFNRDR   | QKGTNV | -37.605 |
| >gi 1708865 sp Q07954.1 L | 2173 | AVANGGCQQLCLYR  | GRGQRA | -35.067 |
| >gi 1708865 sp Q07954.1 L | 2175 | ANGGCQQLCLYRGR  | GQRACA | -33.805 |
| >gi 1708865 sp Q07954.1 L | 2178 | GCQQLCLYRGRGQR  | ACACAH | 5.969   |
| >gi 1708865 sp Q07954.1 L | 2195 | CAHGMMLAEDGASCR | EYAGYL | -43.121 |
| >gi 1708865 sp Q07954.1 L | 2206 | SCREYAGYLLYSER  | TILKSI | -40.014 |
| >gi 1708865 sp Q07954.1 L | 2218 | ERTILKSIHLSDER  | NLNAPV | -37.346 |
| >gi 1708865 sp Q07954.1 L | 2244 | EHMKNVIALAFDYR  | AGTSPG | -36.823 |
| >gi 1708865 sp Q07954.1 L | 2254 | FDYRAGTSPGTPNR  | IFFSDI | -36.849 |
| >gi 1708865 sp Q07954.1 L | 2274 | HFGNIQQINDDGSR  | RITIVE | -44.951 |
| >gi 1708865 sp Q07954.1 L | 2275 | FGNIQQINDDGSRR  | ITIVEN | -33.233 |
| >gi 1708865 sp Q07954.1 L | 2292 | VENVGSVEGLAYHR  | GWDTLY | -29.511 |
| >gi 1708865 sp Q07954.1 L | 2309 | TLYWTSYTTSTITR  | HTVDQT | -25.828 |
| >gi 1708865 sp Q07954.1 L | 2316 | TTSTITRHTVDQTR  | PGAFER | -32.834 |
| >gi 1708865 sp Q07954.1 L | 2322 | RHTVDQTRPGAFAER | ETVITM | -31.619 |
| >gi 1708865 sp Q07954.1 L | 2335 | RETVITMSGDDHPR  | AFVLDE | -38.33  |
| >gi 1708865 sp Q07954.1 L | 2360 | FWTNWNEQHPSIMR  | AALSGA | -25.732 |
| >gi 1708865 sp Q07954.1 L | 2377 | SGANVLTLEKDIR   | TPNGLA | -36.149 |
| >gi 1708865 sp Q07954.1 L | 2387 | KDIRTPNGLAIDHR  | AEKLYF | -28.228 |
| >gi 1708865 sp Q07954.1 L | 2403 | KLYFSDATLDKIER  | CEYDGS | -37.472 |
| >gi 1708865 sp Q07954.1 L | 2411 | LDKIERCEYDGSHR  | YVILKS | -32.41  |
| >gi 1708865 sp Q07954.1 L | 2439 | AVYGEHIFWTDWVR  | RAVQRA | -41.436 |
| >gi 1708865 sp Q07954.1 L | 2440 | VYGEHIFWTDWVRR  | AVQRAN | -18.617 |
| >gi 1708865 sp Q07954.1 L | 2444 | HIFWTDWVRRAVQR  | ANKHVG | -14.188 |

|                           |      |                |        |         |
|---------------------------|------|----------------|--------|---------|
| >gi 1708865 sp Q07954.1 L | 2457 | RANKHVGSNMKLLR | VDIPQQ | -27.571 |
| >gi 1708865 sp Q07954.1 L | 2483 | VANDTNSCELSPCR | INNGGC | -44.394 |
| >gi 1708865 sp Q07954.1 L | 2506 | CLLTHQGHVNCSCR | GGRILQ | -34.163 |
| >gi 1708865 sp Q07954.1 L | 2509 | THQGHVNCSCRGGR | ILQDDL | -24.249 |
| >gi 1708865 sp Q07954.1 L | 2518 | CRGGRILQDDLTCR | AVNSSC | -41.087 |
| >gi 1708865 sp Q07954.1 L | 2525 | QDDLTCRAVNSSCR | AQDEFE | -30.672 |
| >gi 1708865 sp Q07954.1 L | 2564 | KDKSDEKPSYCNSR | RCKKTF | -36.375 |
| >gi 1708865 sp Q07954.1 L | 2565 | DKSDEKPSYCNSRR | CKKTFR | -24.902 |
| >gi 1708865 sp Q07954.1 L | 2571 | PSYCNSRRCKKTFR | QCSNGR | -24.736 |
| >gi 1708865 sp Q07954.1 L | 2577 | RRCKKTFRQCSNGR | CVSNML | -34.524 |
| >gi 1708865 sp Q07954.1 L | 2611 | IPCNKTAGVGEFR  | CRDGTC | -34.836 |
| >gi 1708865 sp Q07954.1 L | 2613 | CNKTAGVGEFRCR  | DGTCIG | -36.492 |
| >gi 1708865 sp Q07954.1 L | 2623 | FRCRDGTCIGNSSR | CNQFVD | -33.392 |
| >gi 1708865 sp Q07954.1 L | 2649 | EMNCSATDCSSYFR | LGVKGV | -43.31  |
| >gi 1708865 sp Q07954.1 L | 2662 | RLGVKGVLFQPCER | TSLCYA | -46.45  |
| >gi 1708865 sp Q07954.1 L | 2686 | CDGANDCGDYSDER | DCPGVK | -51.347 |
| >gi 1708865 sp Q07954.1 L | 2693 | GDYSDERDCPGVKR | PRCPLN | -28.334 |
| >gi 1708865 sp Q07954.1 L | 2695 | YSDERDCPGVKRPR | CPLNYF | -3.419  |
| >gi 1708865 sp Q07954.1 L | 2707 | PRCPLNYFACPSGR | CIPMSW | -32.289 |
| >gi 1708865 sp Q07954.1 L | 2745 | KFCSEAFECQNR   | CISKQW | -35.968 |
| >gi 1708865 sp Q07954.1 L | 2791 | SFSCPGTHVCVPER | WLCDGD | -42.443 |
| >gi 1708865 sp Q07954.1 L | 2821 | IAAGCLYNSTCDDR | EFMCQN | -45.273 |
| >gi 1708865 sp Q07954.1 L | 2828 | NSTCDDREFMCQNR | QCIPKH | -35.89  |
| >gi 1708865 sp Q07954.1 L | 2841 | RQCIPKHFVCDHDR | DCADGS | -50.861 |
| >gi 1708865 sp Q07954.1 L | 2864 | PECEYPTCGPSEFR | CANGRC | -30.635 |
| >gi 1708865 sp Q07954.1 L | 2869 | PTCGPSEFRCANGR | CLSSRQ | -26.831 |
| >gi 1708865 sp Q07954.1 L | 2874 | SEFRCANGRCLSSR | QWECDG | -27.915 |
| >gi 1708865 sp Q07954.1 L | 2916 | KCNASSQFLCSSGR | CVAEAL | -31.796 |
| >gi 1708865 sp Q07954.1 L | 2937 | CNGQDDCGDSSDER | GCHINE | -48.585 |
| >gi 1708865 sp Q07954.1 L | 2947 | SDERGCHINECLSR | KLSGCS | -38.827 |
| >gi 1708865 sp Q07954.1 L | 2966 | SQDCEDLKIGFKCR | CRPGFR | -38.495 |
| >gi 1708865 sp Q07954.1 L | 2968 | DCEDLKIGFKRCR  | PGFRLK | -32.427 |
| >gi 1708865 sp Q07954.1 L | 2972 | LKIGFKRCRPGFR  | LKDDGR | -28.92  |
| >gi 1708865 sp Q07954.1 L | 2978 | CRCRPGFRLKDDGR | TCADVD | -36.051 |
| >gi 1708865 sp Q07954.1 L | 2995 | DVDECSTTFPCSQR | CINTHG | -28.152 |
| >gi 1708865 sp Q07954.1 L | 3014 | GSYKCLVEGYAPR  | GGDPHS | -32.843 |
| >gi 1708865 sp Q07954.1 L | 3036 | AVTDEEPFLIFANR | YYLRKL | -37.371 |
| >gi 1708865 sp Q07954.1 L | 3040 | EEPFLIFANRYLR  | KLNLDG | -28.381 |
| >gi 1708865 sp Q07954.1 L | 3067 | QGLNNAVALDFDYR | EQMIYW | -46.011 |
| >gi 1708865 sp Q07954.1 L | 3084 | IYWTDVTTQGSMIR | RMHLNG | -38.081 |
| >gi 1708865 sp Q07954.1 L | 3085 | YWTDVTTQGSMIRR | MHLNGS | -23.497 |
| >gi 1708865 sp Q07954.1 L | 3098 | RMHLNGSNVQVLHR | TGLSNP | -27.971 |
| >gi 1708865 sp Q07954.1 L | 3123 | DWVGGNLYWCDKGR | DTIEVS | -41.129 |

|                           |      |                  |         |         |
|---------------------------|------|------------------|---------|---------|
| >gi 1708865 sp Q07954.1 L | 3136 | RDTIEVSKLNGAYR   | TVLVSS  | -36.455 |
| >gi 1708865 sp Q07954.1 L | 3145 | NGAYRTVLVSSGLR   | EPRALV  | -26.649 |
| >gi 1708865 sp Q07954.1 L | 3148 | YRTVLVSSGLREPR   | ALVVDV  | -8.643  |
| >gi 1708865 sp Q07954.1 L | 3172 | LYWTDWGDHSLIGR   | IGMDGS  | -32.217 |
| >gi 1708865 sp Q07954.1 L | 3180 | HSLIGRIGMDGSSR   | SVIVDT  | -31.62  |
| >gi 1708865 sp Q07954.1 L | 3202 | TWPNGLTLDYVTER   | IYWADA  | -53.082 |
| >gi 1708865 sp Q07954.1 L | 3209 | LDYVTERIYWADAR   | EDYIEF  | -38.346 |
| >gi 1708865 sp Q07954.1 L | 3223 | EDYIEFASLDGSNR   | HVVLSSQ | -33.479 |
| >gi 1708865 sp Q07954.1 L | 3256 | YVYWTDWETKSINR   | AHKTGT  | -26.289 |
| >gi 1708865 sp Q07954.1 L | 3274 | TGTNKTLLISTLHR   | PMDLHV  | -36.656 |
| >gi 1708865 sp Q07954.1 L | 3285 | LHRPMDLHV FHALR  | QPDVFN  | -14.252 |
| >gi 1708865 sp Q07954.1 L | 3328 | CACPTNFYLGSDGR   | TCVSNC  | -37.97  |
| >gi 1708865 sp Q07954.1 L | 3375 | HSDEPPDCPEFKCR   | PGQFQC  | -37.974 |
| >gi 1708865 sp Q07954.1 L | 3425 | VCLPSQFKCTNTNR   | CIPGIF  | -35.41  |
| >gi 1708865 sp Q07954.1 L | 3432 | KCTNTNRCIPGIFR   | CNGQDN  | -35.875 |
| >gi 1708865 sp Q07954.1 L | 3446 | CNGQDNCGDGEDER   | DCPEVT  | -54.092 |
| >gi 1708865 sp Q07954.1 L | 3465 | TCAPNQFQCSITKR   | CIPRVW  | -14.494 |
| >gi 1708865 sp Q07954.1 L | 3469 | NQFQCSITKR CIPR  | VWVCDR  | -24.046 |
| >gi 1708865 sp Q07954.1 L | 3475 | ITKRCIPRVWVCDR   | DNDCVD  | -42.125 |
| >gi 1708865 sp Q07954.1 L | 3500 | ANCTQMTCGVDEFR   | CKDSGR  | -37.174 |
| >gi 1708865 sp Q07954.1 L | 3506 | TCGVDEFRCCKDSGR  | CIPARW  | -30.367 |
| >gi 1708865 sp Q07954.1 L | 3511 | EFRCCKDSGR CIPAR | WKCDGE  | -25.121 |
| >gi 1708865 sp Q07954.1 L | 3534 | GDGSDPEKKECDER   | TCEPYQ  | -53.499 |
| >gi 1708865 sp Q07954.1 L | 3542 | EEDERTCEPYQFR    | CKNNRC  | -37.003 |
| >gi 1708865 sp Q07954.1 L | 3547 | RTCEPYQFRCKNNR   | CVPGRW  | -19.12  |
| >gi 1708865 sp Q07954.1 L | 3552 | YQFRCKNNRCVPGR   | WQCDYD  | -28.494 |
| >gi 1708865 sp Q07954.1 L | 3573 | DCGDNSDEESCTPR   | PCSESE  | -33.35  |
| >gi 1708865 sp Q07954.1 L | 3586 | RPCSESEFSCANGR   | CIAGR W | -33.918 |
| >gi 1708865 sp Q07954.1 L | 3591 | SEFSCANGRCIAGR   | WKCDGD  | -28.662 |
| >gi 1708865 sp Q07954.1 L | 3612 | DCADGSDKDECTPR   | CDMDQF  | -26.413 |
| >gi 1708865 sp Q07954.1 L | 3629 | DQFQCKSGHCIPLR   | WRCDAD  | -33.656 |
| >gi 1708865 sp Q07954.1 L | 3631 | FQCKSGHCIPLRWR   | CDADAD  | -34.508 |
| >gi 1708865 sp Q07954.1 L | 3652 | MDGSDEEACGTGVR   | TCPLDE  | -35.598 |
| >gi 1708865 sp Q07954.1 L | 3692 | CGDNSDENPEECAR   | FVCPFN  | -35.309 |
| >gi 1708865 sp Q07954.1 L | 3699 | NPEECARFVCPFN    | PFRCKN  | -38.69  |
| >gi 1708865 sp Q07954.1 L | 3702 | ECARFVCPFNRPFR   | CKNDRV  | -6.463  |
| >gi 1708865 sp Q07954.1 L | 3707 | VCPFNRPFRCKNDR   | VCLWIG  | -33.329 |
| >gi 1708865 sp Q07954.1 L | 3714 | FRCKNDRVCLWIGR   | QCDGTD  | -36.403 |
| >gi 1708865 sp Q07954.1 L | 3750 | HTTHCKDKKEFLCR   | NQRCLS  | -31.508 |
| >gi 1708865 sp Q07954.1 L | 3753 | HCKDKKEFLCRNQR   | CLSSSL  | -16.163 |
| >gi 1708865 sp Q07954.1 L | 3760 | FLCRNQRCLSSSLR   | CNMFDD  | -25.339 |
| >gi 1708865 sp Q07954.1 L | 3797 | SCATNASICGDEAR   | CVRTEK  | -37.095 |
| >gi 1708865 sp Q07954.1 L | 3800 | TNASICGDEARCVR   | TEKAA Y | -32.226 |



|                           |      |                 |        |         |
|---------------------------|------|-----------------|--------|---------|
| >gi 1708865 sp Q07954.1 L | 3810 | RCVRTEKAAYCACR  | SGFHTV | -37.869 |
| >gi 1708865 sp Q07954.1 L | 3830 | PGQPGCQDINECLR  | FGTCSQ | -42.407 |
| >gi 1708865 sp Q07954.1 L | 3851 | CNNTKGGHLCSCAR  | NFMKTH | -41.284 |
| >gi 1708865 sp Q07954.1 L | 3879 | EYQVLYIADDNEIR  | SLFPGH | -44.517 |
| >gi 1708865 sp Q07954.1 L | 3901 | SAYEQAFQGDSEVR  | IDAMDV | -45.191 |
| >gi 1708865 sp Q07954.1 L | 3913 | VRIDAMDVHVKAGR  | VYWTNW | -31.072 |
| >gi 1708865 sp Q07954.1 L | 3927 | VYWTNWHTGTISYR  | SLPPAA | -19.37  |
| >gi 1708865 sp Q07954.1 L | 3940 | RSLPPAAPPTTSNR  | HRRQID | -29.827 |
| >gi 1708865 sp Q07954.1 L | 3942 | LPPAAPPTTSNRHR  | RQIDRG | -26.145 |
| >gi 1708865 sp Q07954.1 L | 3947 | PPTTSNRHRRQIDR  | GVTHLN | -13.605 |
| >gi 1708865 sp Q07954.1 L | 3961 | GVTHLNISGLKMPR  | GIAIDW | -5.904  |
| >gi 1708865 sp Q07954.1 L | 3979 | DWVAGNVYWTDSGR  | DVIEVA | -35.788 |
| >gi 1708865 sp Q07954.1 L | 3992 | RDVIEVAQMKGENR  | KTLSIG | -32.891 |
| >gi 1708865 sp Q07954.1 L | 4012 | MIDEPHAIIVDPLR  | GTMYSW | -31.315 |
| >gi 1708865 sp Q07954.1 L | 4036 | HPKIETAAMDGTLR  | ETLVQD | -33.315 |
| >gi 1708865 sp Q07954.1 L | 4058 | QWPTGLAVDYHNER  | LYWADA | -48.238 |
| >gi 1708865 sp Q07954.1 L | 4073 | YWADAKLSVIGSIR  | LNGTDP | -34.732 |
| >gi 1708865 sp Q07954.1 L | 4087 | LNGTDPIVAADSKR  | GLSHPF | -15.871 |
| >gi 1708865 sp Q07954.1 L | 4111 | FEDYIYGVTYINNR  | VFKIHK | -38.243 |
| >gi 1708865 sp Q07954.1 L | 4153 | HQHKQPEVTNPCDR  | KKCEWL | -45.609 |
| >gi 1708865 sp Q07954.1 L | 4176 | SPSGPVCTCPNGKR  | LDNGTC | -31.653 |
| >gi 1708865 sp Q07954.1 L | 4196 | VPVPSPTPPDAPR   | PGTCNL | -32.367 |
| >gi 1708865 sp Q07954.1 L | 4215 | LQCFNGGSCFLNAR  | RQPKCR | -35.841 |
| >gi 1708865 sp Q07954.1 L | 4216 | QCFNGGSCFLNARR  | QPKCRC | -21.567 |
| >gi 1708865 sp Q07954.1 L | 4221 | GSCFLNARRQPKCR  | CQPRYT | -24.466 |
| >gi 1708865 sp Q07954.1 L | 4225 | LNARRQPKCRCQPR  | YTGDKC | -23.319 |
| >gi 1708865 sp Q07954.1 L | 4241 | GDKCELDQCWEHCR  | NGGTCA | -48.249 |
| >gi 1708865 sp Q07954.1 L | 4257 | GTCAASPSGMPTCR  | CPTGFT | -31.52  |
| >gi 1708865 sp Q07954.1 L | 4293 | STCTVNQGNQPQCR  | CLPGFL | -32.97  |
| >gi 1708865 sp Q07954.1 L | 4302 | QPQCRCCLPGFLGDR | CQYRQC | -39.351 |
| >gi 1708865 sp Q07954.1 L | 4306 | RCLPGFLGDRQYR   | QCSGYC | -32.173 |
| >gi 1708865 sp Q07954.1 L | 4326 | ENFGTCQMAADGSR  | QCRCTA | -34.111 |
| >gi 1708865 sp Q07954.1 L | 4329 | GTCQMAADGSRQCR  | CTAYFE | -13.411 |
| >gi 1708865 sp Q07954.1 L | 4338 | SRQCRCTAYFEGSR  | CEVNKC | -40.645 |
| >gi 1708865 sp Q07954.1 L | 4346 | YFEGSRCEVNKCSR  | CLEGAC | -22.657 |
| >gi 1708865 sp Q07954.1 L | 4369 | KQSGDVTCNCTDGR  | VAPSCL | -39.705 |
| >gi 1708865 sp Q07954.1 L | 4407 | MPECQCPPHMTGPR  | CEEHVF | -32.368 |
| >gi 1708865 sp Q07954.1 L | 4446 | LLVLVAGVFWYKR   | RVQGAK | -23.749 |
| >gi 1708865 sp Q07954.1 L | 4447 | LVLVAGVFWYKRR   | VQGAKG | -30.289 |
| >gi 1708865 sp Q07954.1 L | 4458 | KRRVQGAKGFQHQR  | MTNGAM | -24.987 |
| >gi 1708865 sp Q07954.1 L | 4518 | PVYATLYMGGHGSR  | HSLAST | -12.661 |
| >gi 1708865 sp Q07954.1 L | 4528 | HGSRHSLASTDEKR  | ELLGRG | -19.906 |
| >gi 1708865 sp Q07954.1 L | 4533 | SLASTDEKRELLGR  | GPEDEI | -11.591 |

|                           |      |                 |        |         |
|---------------------------|------|-----------------|--------|---------|
| >gi 1352528 sp Q01705.2 N | 23   | CLLLPARAARGLR   | CSQPSG | -1.083  |
| >gi 1352528 sp Q01705.2 N | 36   | RCSQPSGTCLNGGR  | CEVASG | -39.236 |
| >gi 1352528 sp Q01705.2 N | 56   | TEACVASGSFVQQR  | CQDPNP | -24.921 |
| >gi 1352528 sp Q01705.2 N | 67   | GQRCQDPNPCLSTR  | CKNAGT | -31.129 |
| >gi 1352528 sp Q01705.2 N | 112  | LTPLDKPLANPCR   | NGGTCD | -33.836 |
| >gi 1352528 sp Q01705.2 N | 128  | GTCDLLLLEYKCR   | CSPGWS | -35.387 |
| >gi 1352528 sp Q01705.2 N | 165  | GGQCLPFESSYICR  | CPPGFH | -31.237 |
| >gi 1352528 sp Q01705.2 N | 176  | ICRCPPGFHGPTCR  | QDVNEC | -29.294 |
| >gi 1352528 sp Q01705.2 N | 190  | QDVNECSQNPGLCR  | HGGHCH | -34.416 |
| >gi 1352528 sp Q01705.2 N | 203  | RHGGHCHNEIGSYR  | CACCAT | -34.098 |
| >gi 1352528 sp Q01705.2 N | 234  | PCSPSPCQNGATCR  | PTGDTT | -32.299 |
| >gi 1352528 sp Q01705.2 N | 282  | GGACVDGVNTYNCR  | CPPEVT | -36.509 |
| >gi 1352528 sp Q01705.2 N | 353  | ASAACFQGATCHDR  | VASFYC | -42.109 |
| >gi 1352528 sp Q01705.2 N | 365  | DRVASFYCECPHGR  | TGLLCH | -40.555 |
| >gi 1352528 sp Q01705.2 N | 396  | EGSNCDTNPVNGKR  | ICTCPS | -25.904 |
| >gi 1352528 sp Q01705.2 N | 422  | CSQDVDECDLGANR  | CEHAGK | -41.335 |
| >gi 1352528 sp Q01705.2 N | 613  | CETNINECHSQPCR  | HGGTCQ | -27.906 |
| >gi 1352528 sp Q01705.2 N | 621  | HSQPCRHHGGTCQDR | DNSYLC | -35.77  |
| >gi 1352528 sp Q01705.2 N | 703  | GGTCEDEGIAGFTCR | CPEGYH | -30.008 |
| >gi 1352528 sp Q01705.2 N | 731  | NECNSNPCIHGACR  | DGLNGY | -36.56  |
| >gi 1352528 sp Q01705.2 N | 780  | TCKDMTSGYVCTCR  | EGFSGP | -33.99  |
| >gi 1352528 sp Q01705.2 N | 879  | CEVDINECVKSPCR  | HGASCQ | -30.31  |
| >gi 1352528 sp Q01705.2 N | 892  | RHGASCQNTNGSYR  | CLCQAG | -28.029 |
| >gi 1352528 sp Q01705.2 N | 902  | GSYRCLCQAGYTGR  | NCESDI | -27.739 |
| >gi 1352528 sp Q01705.2 N | 912  | YTGRNCESDIDDCR  | PNPCHN | -50.614 |
| >gi 1352528 sp Q01705.2 N | 1028 | GSYCQYDVNECDSR  | PCLHGG | -45.743 |
| >gi 1352528 sp Q01705.2 N | 1061 | PQGYTGLNCQNLVR  | WCDSAP | -40.701 |
| >gi 1352528 sp Q01705.2 N | 1073 | VRWCDSAPCKNGGR  | CWQTNT | -33.905 |
| >gi 1352528 sp Q01705.2 N | 1086 | RCWQTNTQYHCECR  | SGWTGV | -32.839 |
| >gi 1352528 sp Q01705.2 N | 1108 | DVLSVSCEVAAQKR  | GIDVTL | -15.658 |
| >gi 1352528 sp Q01705.2 N | 1211 | CIDLTNSYKCS CPR | GTQGVH | -31.16  |
| >gi 1352528 sp Q01705.2 N | 1234 | NVDDCHPPLDPASR  | SPKCFN | -30.273 |
| >gi 1352528 sp Q01705.2 N | 1263 | GYTCTCPPGFVGER  | CEGDVN | -38.36  |
| >gi 1352528 sp Q01705.2 N | 1279 | GDVNECLSNPCDPR  | GTQNCV | -31.479 |
| >gi 1352528 sp Q01705.2 N | 1287 | NPCDPRGTQNCVQR  | VNDFHC | -35.288 |
| >gi 1352528 sp Q01705.2 N | 1296 | NCVQRVNDFHCECR  | AGHTGR | -34.251 |
| >gi 1352528 sp Q01705.2 N | 1302 | NDFHCECRAGHTGR  | RCESVI | -12.505 |
| >gi 1352528 sp Q01705.2 N | 1303 | DFHCECRAGHTGRR  | CESVIN | -21.991 |
| >gi 1352528 sp Q01705.2 N | 1312 | HTGRRCESVINGCR  | GKPCKN | -33.541 |
| >gi 1352528 sp Q01705.2 N | 1330 | KNGGVCAVASNTAR  | GFICRC | -24.767 |
| >gi 1352528 sp Q01705.2 N | 1335 | CAVASNTARGFICR  | CPAGFE | -26.09  |
| >gi 1352528 sp Q01705.2 N | 1350 | PAGFEGATCENDAR  | TCGSLR | -43.351 |
| >gi 1352528 sp Q01705.2 N | 1356 | ATCENDARTCGSLR  | CLNGGT | -29.5   |

|                           |      |                |        |         |
|---------------------------|------|----------------|--------|---------|
| >gi 1352528 sp Q01705.2 N | 1368 | LRCLNGGTCISGPR | SPTCLC | -30.28  |
| >gi 1352528 sp Q01705.2 N | 1413 | QGTCEPTENPFYR  | CLCPAK | -37.476 |
| >gi 1352528 sp Q01705.2 N | 1568 | EWDGLDCAEHVPER | LAAGTL | -39.151 |
| >gi 1352528 sp Q01705.2 N | 1586 | TLVLVLLPPDQLR  | NNSFHF | -32.288 |
| >gi 1352528 sp Q01705.2 N | 1594 | PPDQLRNNSFHFLR | ELSHVL | -9.64   |
| >gi 1352528 sp Q01705.2 N | 1608 | ELSHVLHTNVVFKR | DAQGQQ | -10.981 |
| >gi 1352528 sp Q01705.2 N | 1627 | QMIFPYYGHEEELR | KHPIKR | -44.694 |
| >gi 1352528 sp Q01705.2 N | 1633 | YGHEEELRKHPIKR | STVGWA | -8.182  |
| >gi 1352528 sp Q01705.2 N | 1651 | WATSSLLPGTSGGR | QRRELD | -32.537 |
| >gi 1352528 sp Q01705.2 N | 1653 | TSSLLPGTSGGRQR | RELDPM | -26.566 |
| >gi 1352528 sp Q01705.2 N | 1662 | GGRQRRELDPMDIR | GSIVYL | -41.202 |
| >gi 1352528 sp Q01705.2 N | 1673 | DIRGSIVYLEIDNR | QCVOSS | -35.568 |
| >gi 1352528 sp Q01705.2 N | 1748 | VLLFFVCGVLLSR  | KRRRQH | -31.901 |
| >gi 1352528 sp Q01705.2 N | 1750 | LFFVCGVLLSRKR  | RRQHGX | -21.53  |
| >gi 1352528 sp Q01705.2 N | 1751 | FFVCGVLLSRKRR  | RQHGX  | 10.802  |
| >gi 1352528 sp Q01705.2 N | 1752 | FVCGVLLSRKRRR  | QHGX   | 4.411   |
| >gi 1352528 sp Q01705.2 N | 1773 | PEGFKVSEASKKKR | REPLGE | 2.46    |
| >gi 1352528 sp Q01705.2 N | 1774 | EGFKVSEASKKKRR | EPLGED | 12.143  |
| >gi 1352528 sp Q01705.2 N | 1814 | NEWGDEDLETKKFR | FEPPVV | -20.347 |
| >gi 1352528 sp Q01705.2 N | 1831 | PVVLPLDSDQTDHR | QWTQQH | -42.016 |
| >gi 1352528 sp Q01705.2 N | 1844 | RQWTQQHLDAADLR | MSAMAP | -38.539 |
| >gi 1352528 sp Q01705.2 N | 1867 | QGEVDADCMDVNVR | GPDGFT | -31.414 |
| >gi 1352528 sp Q01705.2 N | 1916 | FIYQGASLHNQTDR | TGETAL | -36.796 |
| >gi 1352528 sp Q01705.2 N | 1927 | TDRTGETALHLAAR | YSRSDR | -13.203 |
| >gi 1352528 sp Q01705.2 N | 1930 | TGETALHLAARYSR | SDRRKR | -1.422  |
| >gi 1352528 sp Q01705.2 N | 1933 | TALHLAARYSRSDR | RKRLEA | -20.438 |
| >gi 1352528 sp Q01705.2 N | 1934 | ALHLAARYSRSDRR | KRLEAS | -21.621 |
| >gi 1352528 sp Q01705.2 N | 1936 | HLAARYSRSDRRKR | LEASAD | -17.468 |
| >gi 1352528 sp Q01705.2 N | 1951 | EASADANIQDNMGR | TPLHAA | -44.025 |
| >gi 1352528 sp Q01705.2 N | 1971 | VSADAQGVFQILLR | NRATDL | -28.127 |
| >gi 1352528 sp Q01705.2 N | 1973 | ADAQGVFQILLRNR | ATDLDA | -30.304 |
| >gi 1352528 sp Q01705.2 N | 1980 | QILLRNRATDLDR  | MHDGTT | -43.972 |
| >gi 1352528 sp Q01705.2 N | 1993 | RMHDGTTPLILAAR | LAVEGM | -30.555 |
| >gi 1352528 sp Q01705.2 N | 2059 | ENNKEETSLFLSIR | RESYET | -33.702 |
| >gi 1352528 sp Q01705.2 N | 2060 | NNKEETSLFLSIRR | ESYETA | -18.027 |
| >gi 1352528 sp Q01705.2 N | 2076 | YETAKVLLDHFANR | DITDHM | -31.605 |
| >gi 1352528 sp Q01705.2 N | 2084 | DHFANRDITDHMDR | LPRDIA | -43.367 |
| >gi 1352528 sp Q01705.2 N | 2087 | ANRDITDHMDRLPR | DIAQER | -5.437  |
| >gi 1352528 sp Q01705.2 N | 2093 | DHMDRLPRDIAQER | MHHDIV | -47.858 |
| >gi 1352528 sp Q01705.2 N | 2100 | RDIAQERMHHDIVR | LLDEYN | -30.108 |
| >gi 1352528 sp Q01705.2 N | 2109 | HDIVRLLDEYNLVR | SPQLHG | -36.779 |
| >gi 1352528 sp Q01705.2 N | 2148 | PGNLKSATQGKKAR | KPSTKG | -20.003 |
| >gi 1352528 sp Q01705.2 N | 2168 | LACGSKEAKDLKAR | RKSSQD | -14.787 |

|                           |      |                 |        |         |
|---------------------------|------|-----------------|--------|---------|
| >gi 1352528 sp Q01705.2 N | 2169 | ACGSKEAKDLKARR  | KSSQDG | -17.646 |
| >gi 1352528 sp Q01705.2 N | 2253 | AAKPEMAALAGGSR  | LAFEHP | -32.816 |
| >gi 1352528 sp Q01705.2 N | 2262 | AGGSRLAFEHPPPR  | LSHLPV | -34.214 |
| >gi 1352528 sp Q01705.2 N | 2303 | APASLNGQCEWLPR  | LQNGMV | -42.288 |
| >gi 1352528 sp Q01705.2 N | 2317 | LQNGMVPSQYNPLR  | PGVTPG | -39.631 |
| >gi 1352528 sp Q01705.2 N | 2361 | TLSPHIIYQGLPNTR | LATQPH | -31.662 |
| >gi 1352528 sp Q01705.2 N | 2406 | HLSVSSAANGHLGR  | SFLSGE | -12.98  |
| >gi 14018366 emb CAC38357 | 40   | TMTAATAATSVAAR  | TRPARP | -27.292 |
| >gi 14018366 emb CAC38357 | 42   | TAATAATSVAARTR  | PARPAS | -26.553 |
| >gi 14018366 emb CAC38357 | 45   | TAATSVAARTRPAR  | PASSAV | 7.114   |
| >gi 14018366 emb CAC38357 | 71   | SLSAGSATASSTAR  | TARMRR | -26.263 |
| >gi 14018366 emb CAC38357 | 74   | AGSATASSTARTAR  | MRRPSS | -2.215  |
| >gi 14018366 emb CAC38357 | 76   | SATASSTARTARMR  | RPSSAG | -23.886 |
| >gi 14018366 emb CAC38357 | 84   | RTARMRRPSSAGER  | ARGPRP | -33.804 |
| >gi 14018366 emb CAC38357 | 86   | ARMRRPSSAGERAR  | GPRPRQ | -24.474 |
| >gi 14018366 emb CAC38357 | 89   | RRPSSAGERARGPR  | PRQQA  | 3.673   |
| >gi 14018366 emb CAC38357 | 91   | PSSAGERARGPRPR  | QQPAPR | -16.3   |
| >gi 14018366 emb CAC38357 | 97   | RARGPRPRQQPAPR  | PPSSPA | -29.066 |
| >gi 14018366 emb CAC38357 | 122  | YTWAGAATATATAR  | TSLTRP | -28.379 |
| >gi 14018366 emb CAC38357 | 127  | AATATATARTSLTR  | PTAVSP | -22.971 |
| >gi 84028263 sp Q99523.3  | 36   | LLQLLPPSTLSQDR  | LDAPPP | -43.242 |
| >gi 84028263 sp Q99523.3  | 49   | RLDAPPPPAAPLPR  | WSGPIG | -27.719 |
| >gi 84028263 sp Q99523.3  | 61   | PRWSGPIGVSWGLR  | AAAAGG | -24.843 |
| >gi 84028263 sp Q99523.3  | 71   | WGLRAAAAGGAFPR  | GGRWRR | -25.465 |
| >gi 84028263 sp Q99523.3  | 74   | RAAAAGGAFPRGGR  | WRRSAP | -26.202 |
| >gi 84028263 sp Q99523.3  | 76   | AAAGGAFPRGGRWR  | RSAPGE | -21.971 |
| >gi 84028263 sp Q99523.3  | 88   | WRRSAPGEDEECGR  | VRDFVA | -52.19  |
| >gi 84028263 sp Q99523.3  | 90   | RSAPGEDEECGRVR  | DFVAKL | -40.533 |
| >gi 84028263 sp Q99523.3  | 109  | LANNTHQHVFDDLRL | GSVSLS | -37.597 |
| >gi 84028263 sp Q99523.3  | 146  | PLVIMTFGQSKLYR  | SEDYGK | -14.637 |
| >gi 84028263 sp Q99523.3  | 167  | FKDITDLINNTFIR  | TEFGMA | -41.092 |
| >gi 84028263 sp Q99523.3  | 193  | GKVVLTAEVSGGSR  | GGRIFR | -28.579 |
| >gi 84028263 sp Q99523.3  | 196  | VLTAEVSGGSRGGR  | IFRSSD | -21.359 |
| >gi 84028263 sp Q99523.3  | 199  | AEVSGGSRGGRIFR  | SSDFAK | 5.603   |
| >gi 84028263 sp Q99523.3  | 288  | GCKADLGALELWR   | TSDLGK | -38.051 |
| >gi 84028263 sp Q99523.3  | 311  | TIGVKIYSFGLGGR  | FLFASV | -30.806 |
| >gi 84028263 sp Q99523.3  | 325  | FLFASVMADKDTTR  | RIHVST | -32.08  |
| >gi 84028263 sp Q99523.3  | 326  | LFASVMADKDTTRR  | IHVSTD | -29.938 |
| >gi 84028263 sp Q99523.3  | 382  | GDTGFGTIFTSDDR  | GIVYSK | -45.781 |
| >gi 84028263 sp Q99523.3  | 392  | SDDRGIVYSKSLDR  | HLYTTT | -28.288 |
| >gi 84028263 sp Q99523.3  | 411  | TGGETDFTNVTSLR  | GVYITS | -24.682 |
| >gi 84028263 sp Q99523.3  | 436  | NSIQTMITFDQGGR  | WTHLRK | -41.968 |
| >gi 84028263 sp Q99523.3  | 441  | MITFDQGGRWTHLR  | KPENSE | -30.572 |

|                           |     |                 |        |         |
|---------------------------|-----|-----------------|--------|---------|
| >gi 84028263 sp Q99523.3  | 542 | DSGGIIVAIHSSR   | PINVIK | -23.655 |
| >gi 84028263 sp Q99523.3  | 564 | TDEGQCWQTYTFTR  | DPIYFT | -33.29  |
| >gi 84028263 sp Q99523.3  | 579 | PIYFTGLASEPGAR  | SMNISI | -34.439 |
| >gi 84028263 sp Q99523.3  | 610 | WVSYTIDFKDILER  | NCEEKD | -31.799 |
| >gi 84028263 sp Q99523.3  | 644 | EDGCILGYKEQFLR  | LRKSSV | -32.562 |
| >gi 84028263 sp Q99523.3  | 646 | GCILGYKEQFLRLR  | KSSVCQ | -31.787 |
| >gi 84028263 sp Q99523.3  | 655 | FLRLRKSSVCQNGR  | DYVVTK | -37.838 |
| >gi 84028263 sp Q99523.3  | 681 | CSLEDFLCDFGYYR  | PENDSK | -47.981 |
| >gi 84028263 sp Q99523.3  | 706 | ELKGHDFCLYGR    | EEHLTT | -41.373 |
| >gi 84028263 sp Q99523.3  | 716 | LYGREEHLTTNGYR  | KIPGDK | -39.011 |
| >gi 84028263 sp Q99523.3  | 731 | IPGDKCQGGVNPVR  | EVKDLK | -23.739 |
| >gi 84028263 sp Q99523.3  | 786 | AGVLIVKKYVCGGR  | FLVHRY | -30.42  |
| >gi 84028263 sp Q99523.3  | 791 | VKKYVCGGRFLVHR  | YSVLQQ | -11.661 |
| >gi 8928570 sp Q61180.2 S | 51  | PPLPMQGLGKGDKR  | EEQALG | -24.278 |
| >gi 8928570 sp Q61180.2 S | 64  | REEQALGPEPSEPR  | QPTEEE | -32.751 |
| >gi 8928570 sp Q61180.2 S | 78  | QPTEEEALIEFHR   | SYRELF | -31.564 |
| >gi 8928570 sp Q61180.2 S | 81  | EEEEALIEFHRSYR  | ELFQFF | -4.337  |
| >gi 8928570 sp Q61180.2 S | 98  | QFFCNNTTIHGAI   | LVCSKH | -31.833 |
| >gi 8928570 sp Q61180.2 S | 106 | IHGAI RLVCSKHNR | MKTAFW | -27.791 |
| >gi 8928570 sp Q61180.2 S | 164 | VFPAVTVCTLNPYR  | YTEIKE | -32.98  |
| >gi 8928570 sp Q61180.2 S | 177 | RYTEIKEDLEELDR  | ITEQTL | -50.4   |
| >gi 8928570 sp Q61180.2 S | 195 | TLFDLYKYNSSYTR  | QAGGRR | -28.133 |
| >gi 8928570 sp Q61180.2 S | 200 | YKYNSSYTRQAGGR  | RRSTRD | -25.898 |
| >gi 8928570 sp Q61180.2 S | 201 | KYNSSYTRQAGGRR  | RSTRDL | -18.08  |
| >gi 8928570 sp Q61180.2 S | 202 | YNSSYTRQAGGRRR  | STRDLR | -9.206  |
| >gi 8928570 sp Q61180.2 S | 208 | RQAGGRRRSTRDLR  | GALPHP | -13.902 |
| >gi 8928570 sp Q61180.2 S | 217 | TRDLRGALPHPLQR  | LRTPPP | -30.546 |
| >gi 8928570 sp Q61180.2 S | 219 | DLRGALPHPLQRLR  | TPPPPN | -26.217 |
| >gi 8928570 sp Q61180.2 S | 228 | LQRLRTPPPNPAR   | SARSAS | -18.87  |
| >gi 8928570 sp Q61180.2 S | 238 | NPARSARSASSSVR  | DNNPQV | -23.794 |
| >gi 8928570 sp Q61180.2 S | 246 | ASSSVRDNNPQVDR  | KDWKIG | -40.109 |
| >gi 8928570 sp Q61180.2 S | 276 | CFYQTYSSGVDAVR  | EWYRFH | -34.214 |
| >gi 8928570 sp Q61180.2 S | 280 | TYSSGVDAVREWYR  | FHYINI | -35.669 |
| >gi 8928570 sp Q61180.2 S | 289 | REWYRFHYINILSR  | LPDTSP | -31.494 |
| >gi 8928570 sp Q61180.2 S | 310 | LEEEALGSFIFTCR  | FNQAPC | -34.574 |
| >gi 8928570 sp Q61180.2 S | 360 | SMPGVNNGLSLTLR  | TEQNDF | -34.851 |
| >gi 8928570 sp Q61180.2 S | 377 | NDFIPLLSTVTGAR  | VMVHGQ | -37.905 |
| >gi 8928570 sp Q61180.2 S | 397 | DEPAFMDDGGFNVR  | PGVETS | -31.652 |
| >gi 8928570 sp Q61180.2 S | 407 | FNVRPGVETSISMR  | KEALDS | -33.826 |
| >gi 8928570 sp Q61180.2 S | 503 | AFSLDSLGCFSKCR  | KPCSVT | -43.92  |
| >gi 8928570 sp Q61180.2 S | 519 | CSVTNYKLSAGYSR  | WPSVKS | -33.663 |
| >gi 8928570 sp Q61180.2 S | 545 | MLSLQNNYTINNK   | NGVAKL | -19.588 |
| >gi 8928570 sp Q61180.2 S | 614 | FDLLVITLIMLLHR  | FRSRYW | -33.565 |

|                           |     |                 |        |         |
|---------------------------|-----|-----------------|--------|---------|
| >gi 8928570 sp Q61180.2 S | 616 | LLVITLIMLLHRFR  | SRYWSP | -15.983 |
| >gi 8928570 sp Q61180.2 S | 618 | VITLIMLLHRFRSR  | YWSPGR | -22.254 |
| >gi 8928570 sp Q61180.2 S | 624 | LLHRFRSRYWSPGR  | GARGAR | -32.732 |
| >gi 8928570 sp Q61180.2 S | 627 | RFRSRYWSPGRGAR  | GAREVA | 8.77    |
| >gi 8928570 sp Q61180.2 S | 630 | SRYWSPGRGARGAR  | EVASTP | 8.149   |
| >gi 8928570 sp Q61180.2 S | 643 | REVASTPASSFPSR  | FCPHPT | -26.967 |
| >gi 8928358 sp Q9WU39.1 S | 42  | MHWYCLNTNTHGCR  | RIVVSR | -31.856 |
| >gi 8928358 sp Q9WU39.1 S | 43  | HWYCLNTNTHGCRR  | IVVSRG | -25.734 |
| >gi 8928358 sp Q9WU39.1 S | 48  | NTNTHGCRRIVVSR  | GRLRRL | -0.019  |
| >gi 8928358 sp Q9WU39.1 S | 50  | NTHGCRRIVVSRGR  | LRLLW  | -32.157 |
| >gi 8928358 sp Q9WU39.1 S | 52  | HGCRRIVVSRGLR   | RLWIA  | -18.488 |
| >gi 8928358 sp Q9WU39.1 S | 53  | GCRRIVVSRGLRR   | LLWIAF | -7.742  |
| >gi 8928358 sp Q9WU39.1 S | 140 | SLYGVKVDVLDSTPR | KRREAG | -36.073 |
| >gi 8928358 sp Q9WU39.1 S | 142 | YGVKVDVLDSTPRKR | REAGSM | -20.907 |
| >gi 8928358 sp Q9WU39.1 S | 149 | DSTPRKRREAGSMR  | STWEGT | -31.502 |
| >gi 8928358 sp Q9WU39.1 S | 158 | AGSMRSTWEGTPPR  | FLNLIP | -28.702 |
| >gi 8928358 sp Q9WU39.1 S | 177 | PLLVFNENEKGKAR  | DFFTGR | -25.084 |
| >gi 8928358 sp Q9WU39.1 S | 183 | ENEKGKARDFFTGR  | KRKISG | -36.684 |
| >gi 8928358 sp Q9WU39.1 S | 185 | EKGKARDFFTGRKR  | KISGKI | -24.041 |
| >gi 8928358 sp Q9WU39.1 S | 276 | LVTCCFDGMSCDAR  | NFTLFH | -37.954 |
| >gi 8928358 sp Q9WU39.1 S | 295 | HHPMYGNCYTFNNR  | ENATIL | -33.56  |
| >gi 8928358 sp Q9WU39.1 S | 450 | WMYCYQLYQAFVR   | EELGCQ | -37.272 |
| >gi 8928358 sp Q9WU39.1 S | 520 | LAKLLIFYKDLNQR  | SIMESP | -25.973 |
| >gi 8928358 sp Q9WU39.1 S | 569 | IEVFFIDFFSIIAR  | RQWQKA | -24.945 |
| >gi 8928358 sp Q9WU39.1 S | 570 | EVFFIDFFSIIARR  | QWQKAK | -14.483 |
| >gi 8928358 sp Q9WU39.1 S | 581 | ARRQWQKAKDWWAR  | RRTPPS | -32.092 |
| >gi 8928358 sp Q9WU39.1 S | 582 | RRQWQKAKDWWARR  | RTPPST | -28.538 |
| >gi 8928358 sp Q9WU39.1 S | 583 | RQWQKAKDWWARRR  | TPPSTE | -25.782 |
| >gi 8928358 sp Q9WU39.1 S | 616 | DTDDDLPFTFSAMR  | LPPAPE | -39.627 |
| >gi 8928358 sp Q9WU39.1 S | 632 | PAPEAPVPGTPPPR  | YNTLRL | -27.551 |
| >gi 8928358 sp Q9WU39.1 S | 637 | PVPGTPPPRYNTLR  | LDSAFS | -31.968 |
| >gi 120611 sp P09958.2 FU | 37  | AQGQKVFTNTWAVR  | IPGGPA | -36.918 |
| >gi 120611 sp P09958.2 FU | 50  | RIPGGPAVANSVAR  | KHGFLN | -37.141 |
| >gi 120611 sp P09958.2 FU | 70  | LGQIFGDYYHFVHR  | GVTKRS | -25.364 |
| >gi 120611 sp P09958.2 FU | 81  | WHRGVTKRSLSPHR  | PRHSRL | -29.707 |
| >gi 120611 sp P09958.2 FU | 83  | RGVTKRSLSPHRPR  | HSRLQR | -5.461  |
| >gi 120611 sp P09958.2 FU | 86  | TKRSLSPHRPRHSR  | LQREPQ | -14.557 |
| >gi 120611 sp P09958.2 FU | 89  | SLSPHRPRHSRLQR  | EPQVQW | 9.334   |
| >gi 120611 sp P09958.2 FU | 103 | EPQVQWLEQQVAKR  | RTKRDV | -15.497 |
| >gi 120611 sp P09958.2 FU | 104 | PQVQWLEQQVAKRR  | TKRDVY | -22.007 |
| >gi 120611 sp P09958.2 FU | 130 | KFPQQWYLSGVTQR  | DLNVKA | -14.356 |
| >gi 120611 sp P09958.2 FU | 185 | SFDVNDQDPDPQPR  | YTMND  | -28.177 |
| >gi 120611 sp P09958.2 FU | 193 | PDQPQRYTQMNDNR  | HGTRCA | -38.986 |

|                           |     |                |        |         |
|---------------------------|-----|----------------|--------|---------|
| >gi 120611 sp P09958.2 FU | 197 | PRYTQMNDNRHGTR | CAGEVA | -0.326  |
| >gi 120611 sp P09958.2 FU | 220 | NNGVCVGVVAYNAR | IGGVRM | -34.515 |
| >gi 120611 sp P09958.2 FU | 225 | GVGVAYNARIGGVR | MLDGEV | -22.808 |
| >gi 120611 sp P09958.2 FU | 238 | RMLDGEVTDAVEAR | SLGLNP | -21.423 |
| >gi 120611 sp P09958.2 FU | 268 | GPEDDGKTVDGPAR | LAEEAF | -37.189 |
| >gi 120611 sp P09958.2 FU | 276 | VDGPARLAEEAFFR | GVSQGR | -41.626 |
| >gi 120611 sp P09958.2 FU | 282 | LAEEAFFRGVSQGR | GGLGSI | -26.96  |
| >gi 120611 sp P09958.2 FU | 298 | LGSIFVWASGNGGR | EHDSCN | -34.141 |
| >gi 120611 sp P09958.2 FU | 357 | GNQNEKQIVTTDLR | QKCTES | -33.607 |
| >gi 120611 sp P09958.2 FU | 391 | IALTLEANKNLTWR | DMQHLV | -30.54  |
| >gi 120611 sp P09958.2 FU | 418 | HLNANDWATNGVGR | KVSHSY | -30.963 |
| >gi 120611 sp P09958.2 FU | 448 | VALAQNWTTVAPQR | KCIIDI | -35.746 |
| >gi 120611 sp P09958.2 FU | 464 | IIDILTEPKDIGKR | LEVRKT | -26.265 |
| >gi 120611 sp P09958.2 FU | 468 | LTEPKDIGKRLEVR | KTVTAC | -23.775 |
| >gi 120611 sp P09958.2 FU | 483 | TVTACLGEPNHITR | LEHAQA | -33.155 |
| >gi 120611 sp P09958.2 FU | 490 | EPNHITRLEHAQAR | LTLSYN | -33.678 |
| >gi 120611 sp P09958.2 FU | 497 | LEHAQARLTLSYNR | RGDLAI | -33.172 |
| >gi 120611 sp P09958.2 FU | 498 | EHAQARLTLSYNRR | GDLAIH | -16.964 |
| >gi 120611 sp P09958.2 FU | 512 | GDLAIHLVSPMGTR | STLLAA | -25.284 |
| >gi 120611 sp P09958.2 FU | 519 | VSPMGTRSTLLAAR | PHDYSA | -33.191 |
| >gi 120611 sp P09958.2 FU | 637 | DTHYSTENDVETIR | ASVCAP | -37.061 |
| >gi 120611 sp P09958.2 FU | 677 | SHASLDPVEQTCSR | QSQSSR | -40.327 |
| >gi 120611 sp P09958.2 FU | 683 | PVEQTCSRQSQSSR | ESPPQQ | -18.843 |
| >gi 120611 sp P09958.2 FU | 693 | QSSRESPPQQPPR  | LPPEVE | -30.631 |
| >gi 120611 sp P09958.2 FU | 703 | QPPRLPPEVEAGQR | LRAGLL | -39.24  |
| >gi 120611 sp P09958.2 FU | 705 | PRLPPEVEAGQRLR | AGLLPS | -20.712 |
| >gi 120611 sp P09958.2 FU | 739 | VLVFVTVFLVLQLR | SGFSFR | -24.912 |
| >gi 120611 sp P09958.2 FU | 745 | VFLVLQLRSGFSFR | GVKVYT | -25.98  |
| >gi 120611 sp P09958.2 FU | 754 | GFSFRGVKVYTMDR | GLISYK | -41.552 |
| >gi 120611 sp P09958.2 FU | 781 | QEECPDSEEDEGR  | GERTAF | -51.903 |
| >gi 120611 sp P09958.2 FU | 784 | CPSDSEEDEGRGER | TAFIKD | -28.825 |
| >gi 2499869 sp Q28193.1 F | 25  | AAAGALVLLVADAR | GEKVFT | -36.714 |
| >gi 2499869 sp Q28193.1 F | 47  | WAVHIPGGPAVADR | VARKHG | -33.964 |
| >gi 2499869 sp Q28193.1 F | 50  | HIPGGPAVADRVAR | KHGFLN | -26.703 |
| >gi 2499869 sp Q28193.1 F | 70  | LGQIFGDYYHFWHR | AVTKRS | -24.994 |
| >gi 2499869 sp Q28193.1 F | 81  | WHRAVTKRSLSPHR | LGHNRL | -32.146 |
| >gi 2499869 sp Q28193.1 F | 86  | TKRSLSPHRLGHNR | LQREPQ | -28.864 |
| >gi 2499869 sp Q28193.1 F | 89  | SLSPHRLGHNRLQR | EPQVKW | 7.652   |
| >gi 2499869 sp Q28193.1 F | 103 | EPQVKWLEQQVAKR | RAKRDI | -14.522 |
| >gi 2499869 sp Q28193.1 F | 104 | PQVKWLEQQVAKRR | AKRDIY | -14.173 |
| >gi 2499869 sp Q28193.1 F | 130 | KFPQQWYLSGVTQR | DLNVKE | -14.356 |
| >gi 2499869 sp Q28193.1 F | 145 | LNVKEAWAQQYTGR | GIVVSI | -26.939 |
| >gi 2499869 sp Q28193.1 F | 185 | SFDVNDQDPDPQPR | YTQMND | -28.177 |

|                           |     |                |        |         |
|---------------------------|-----|----------------|--------|---------|
| >gi 2499869 sp Q28193.1 F | 193 | PDPQPRYTQMNDNR | HGTRCA | -38.986 |
| >gi 2499869 sp Q28193.1 F | 197 | PRYTQMNDNRHGTR | CAGEVA | -0.326  |
| >gi 2499869 sp Q28193.1 F | 220 | NNGVCGVGVAYNAR | IGGVRM | -34.515 |
| >gi 2499869 sp Q28193.1 F | 225 | GVGVAYNARIGGVR | MLDGEV | -22.808 |
| >gi 2499869 sp Q28193.1 F | 238 | RMLDGEVTDAVEAR | SLGLNP | -21.423 |
| >gi 2499869 sp Q28193.1 F | 276 | VDGPAHLAEEAFFR | GVSQGR | -42.059 |
| >gi 2499869 sp Q28193.1 F | 282 | LAEEAFFRGVSQGR | GGLGSI | -26.96  |
| >gi 2499869 sp Q28193.1 F | 298 | LGSIFVWASGNGGR | EHDSCN | -34.141 |
| >gi 2499869 sp Q28193.1 F | 357 | GNQNEKQIVTTDLR | QKCTES | -33.607 |
| >gi 2499869 sp Q28193.1 F | 391 | IALTLEANKNLTWR | DMQHLV | -30.54  |
| >gi 2499869 sp Q28193.1 F | 399 | KNLTWRDMQHLVVR | TSKPAH | -19.068 |
| >gi 2499869 sp Q28193.1 F | 418 | HLNANDWATNGVGR | KVSHSY | -30.963 |
| >gi 2499869 sp Q28193.1 F | 448 | VALAQNWTTVAPQR | KCTIDI | -34.972 |
| >gi 2499869 sp Q28193.1 F | 464 | TIDILTEPKDIGKR | LEVRKT | -26.025 |
| >gi 2499869 sp Q28193.1 F | 468 | LTEPKDIGKRLEVR | KTVTAC | -23.775 |
| >gi 2499869 sp Q28193.1 F | 483 | TVTACLGEPSHITR | LEHAQA | -31.275 |
| >gi 2499869 sp Q28193.1 F | 490 | EPSHITRLEHAQAR | LTLSYN | -33.678 |
| >gi 2499869 sp Q28193.1 F | 497 | LEHAQARLTLSYNR | RGDLAI | -33.172 |
| >gi 2499869 sp Q28193.1 F | 498 | EHAQARLTLSYNRR | GDLAIH | -16.964 |
| >gi 2499869 sp Q28193.1 F | 512 | GDLAIHLVSPMGTR | STLLAA | -25.284 |
| >gi 2499869 sp Q28193.1 F | 519 | VSPMGTRSTLLAAR | PHDYSA | -33.191 |
| >gi 2499869 sp Q28193.1 F | 637 | DTHYSTENDVEIIR | ASVCTP | -38.415 |
| >gi 2499869 sp Q28193.1 F | 677 | SHASLDPVEQTCSR | QSQSSR | -40.327 |
| >gi 2499869 sp Q28193.1 F | 683 | PVEQTCSRQSQSSR | ESHQQQ | -19.125 |
| >gi 2499869 sp Q28193.1 F | 695 | SRESHQQQPPPPPR | PPPAEV | -25.198 |
| >gi 2499869 sp Q28193.1 F | 706 | PPRPPPAEVATEPR | LRADLL | -36.11  |
| >gi 2499869 sp Q28193.1 F | 708 | RPPPAEVATEPRLR | ADLLPS | -29.187 |
| >gi 2499869 sp Q28193.1 F | 742 | VLVFVTVFLVLQLR | SGFSFR | -24.912 |
| >gi 2499869 sp Q28193.1 F | 748 | VFLVLQLRSGFSFR | GVKVYT | -25.98  |
| >gi 2499869 sp Q28193.1 F | 757 | GFSFRGVKVYTMDR | GLISYK | -41.552 |
| >gi 2499869 sp Q28193.1 F | 784 | QEECPSDSEEDEGR | GERTAF | -51.903 |
| >gi 2499869 sp Q28193.1 F | 787 | CPSDSEEDEGRGER | TAFIKD | -28.825 |
| >gi 1346604 sp P98089.1 M | 81  | KTTLPGLDFDPPR  | QVNETW | -37.553 |
| >gi 1346604 sp P98089.1 M | 126 | PPMPTCSNGLKPVR | VPDPDG | -23.616 |
| >gi 1346604 sp P98089.1 M | 199 | NYHCDANDKVSCPR | TLIVHH | -30.17  |
| >gi 1346604 sp P98089.1 M | 255 | VYQSGINFVVDIPR | LGAQVS | -38.107 |
| >gi 1346604 sp P98089.1 M | 270 | GAQVSYNGLSFSIR | LPYHLF | -35.961 |
| >gi 1346604 sp P98089.1 M | 332 | SKPHCPHKGLTTKR | PAITTP | -16.617 |
| >gi 1346604 sp P98089.1 M | 409 | AALCAQEGVCIDWR | NHTQGA | -41.607 |
| >gi 1346604 sp P98089.1 M | 424 | HTQGACAVTCPAHR | QYQACG | -36.068 |
| >gi 1346604 sp P98089.1 M | 482 | VKICGCVGPDNVPR | EFGEHF | -32.514 |
| >gi 1346604 sp P98089.1 M | 513 | GGSGIVCQPKKCAR | GNLTTC | -18.147 |
| >gi 1346604 sp P98089.1 M | 548 | KCCNTTSCCKDPKR | CKAERP | -23.573 |



|                           |     |                 |        |         |
|---------------------------|-----|-----------------|--------|---------|
| >gi 1346604 sp P98089.1 M | 553 | TSCKCDPKRCKAER  | PSCLLG | -26.825 |
| >gi 1346604 sp P98089.1 M | 656 | CCKKCQQTTHCIKR  | PEQQYI | -23.751 |
| >gi 1346604 sp P98089.1 M | 676 | ILKPGEIQKNPNDR  | CTFFSC | -30.332 |
| >gi 1346604 sp P98089.1 M | 780 | AQAQDLDHGCSCCR  | EERTSV | -45.026 |
| >gi 1346604 sp P98089.1 M | 783 | QDLDHGCSCCREER  | TSVRMV | -37.759 |
| >gi 1346604 sp P98089.1 M | 787 | HGCSCCREERTSVR  | MVSLDC | -23.37  |
| >gi 1346604 sp P98089.1 M | 825 | QGTVCELPAQQSR   | TRRSSP | -32.103 |
| >gi 1346604 sp P98089.1 M | 827 | TVCELPAQQSRTR   | RSSPRL | -23.78  |
| >gi 1346604 sp P98089.1 M | 832 | PQAQQSRTRRSSPR  | LLGRK- | -15.999 |
| >gi 1346604 sp P98089.1 M | 836 | QSRTRRSSPRLGR   | K----- | -28.362 |
| >gi 66346700 ref NP_05734 | 32  | LWEASGGLDSGASR  | DDDLLL | -34.231 |
| >gi 66346700 ref NP_05734 | 42  | GASRDDDLLLPYPR  | ARARLP | -26.761 |
| >gi 66346700 ref NP_05734 | 44  | SRDDDLLLPYPRAR  | ARLPRD | -29.533 |
| >gi 66346700 ref NP_05734 | 46  | DDDLLLPYPRARAR  | LPRDCT | -21.647 |
| >gi 66346700 ref NP_05734 | 53  | YPRARARLPRDCTR  | VRAGNR | -34.447 |
| >gi 66346700 ref NP_05734 | 55  | RARARLPRDCTRVR  | AGNREH | -38.681 |
| >gi 66346700 ref NP_05734 | 59  | RLPRDCTRVRAGNR  | EHESWP | -26.814 |
| >gi 66346700 ref NP_05734 | 79  | PPPATPGAGGLAVR  | TFVSHF | -36.315 |
| >gi 66346700 ref NP_05734 | 86  | AGGLAVRTFVSHFR  | DRAVAG | -37.347 |
| >gi 66346700 ref NP_05734 | 88  | GLAVRTFVSHFRDR  | AVAGHL | -28.451 |
| >gi 66346700 ref NP_05734 | 96  | SHFRDRAVAGHLTR  | AVEPLR | -5.015  |
| >gi 66346700 ref NP_05734 | 102 | AVAGHLTRAVEPLR  | TFSVLE | -37.19  |
| >gi 66346700 ref NP_05734 | 118 | SVLEPGGPGGCAAR  | RRATVE | -31.108 |
| >gi 66346700 ref NP_05734 | 119 | VLEPGGPGGCAARR  | RATVEE | -24.122 |
| >gi 66346700 ref NP_05734 | 120 | LEPGGPGGCAARRR  | ATVEET | -19.839 |
| >gi 66346700 ref NP_05734 | 128 | CAARRRATVEETAR  | AADCRV | -29.104 |
| >gi 66346700 ref NP_05734 | 133 | RATVEETARAADCR  | VAQNGG | -28.251 |
| >gi 66346700 ref NP_05734 | 142 | AADCRVAQNGGFFR  | MNSGEC | -35.775 |
| >gi 66346700 ref NP_05734 | 157 | NSGECLGNVVS DER | RVSSSG | -41.04  |
| >gi 66346700 ref NP_05734 | 158 | SGECLGNVVS DERR | VSSSGG | -25.997 |
| >gi 66346700 ref NP_05734 | 173 | SSSGGLQNAQFGIR  | RDGTLV | -36.433 |
| >gi 66346700 ref NP_05734 | 174 | SSGGLQNAQFGIRR  | DGTLVT | -20.411 |
| >gi 66346700 ref NP_05734 | 207 | PFVQLLSGVVWLIR  | NGSIYI | -34.187 |
| >gi 66346700 ref NP_05734 | 240 | TGSFSKFNVISAR   | TAIGHD | -23.691 |
| >gi 66346700 ref NP_05734 | 247 | VNVISARTAIGHDR  | KGQLVL | -41.193 |
| >gi 66346700 ref NP_05734 | 263 | QLVLFHADGQTEQR  | GINLWE | -27.729 |
| >gi 66346700 ref NP_05734 | 313 | ASYPSDHCQDNMWR  | CPRQVS | -41.268 |
| >gi 66346700 ref NP_05734 | 316 | PSDHCQDNMWRCPR  | QVSTVV | -21.956 |
| >gi 66346700 ref NP_05734 | 328 | PRQVSTVVCVHEPR  | CQPPDC | -29.131 |
| >gi 66346700 ref NP_05734 | 353 | CVDGHCQCTGHFWR  | GPGCDE | -23.948 |
| >gi 66346700 ref NP_05734 | 379 | NCSQHGLCTETGCR  | CDAGWT | -41.026 |
| >gi 66346700 ref NP_05734 | 404 | EECPLGWHGPGCQR  | PCKCEH | -36.172 |
| >gi 66346700 ref NP_05734 | 425 | CPCDPKTGNCSVSR  | VKQCLQ | -35.118 |

|                           |     |                |        |         |
|---------------------------|-----|----------------|--------|---------|
| >gi 66346700 ref NP_05734 | 438 | RVKQCLQPPEATLR | AGELSF | -27.811 |
| >gi 66346700 ref NP_05734 | 447 | EATLRAGELSFTR  | TAWLAL | -31.48  |
| >gi 66346700 ref NP_05734 | 475 | LISTAANLSLLLSR | AERNRR | -30.33  |
| >gi 66346700 ref NP_05734 | 478 | TAANLSLLLSRAER | NRRLHG | -21.671 |
| >gi 66346700 ref NP_05734 | 480 | ANLSLLLSRAERNR | RLHGDY | -22.849 |
| >gi 66346700 ref NP_05734 | 481 | NLSLLLSRAERNRR | LHGDYA | -18.665 |
| >gi 38258175 sp Q8NBP7.2  | 29  | LLLLLLLLGPAGAR | AQEDED | -26.31  |
| >gi 38258175 sp Q8NBP7.2  | 46  | DEDGDYEELVLALR | SEEDGL | -28.633 |
| >gi 38258175 sp Q8NBP7.2  | 66  | AEAPEHGTTATFHR | CAKDPW | -24.003 |
| >gi 38258175 sp Q8NBP7.2  | 73  | TTATFHRCAKDPWR | LPPTYV | -34.081 |
| >gi 38258175 sp Q8NBP7.2  | 93  | VVLKEETHLSQSER | TARRLQ | -32.205 |
| >gi 38258175 sp Q8NBP7.2  | 96  | KEETHLSQSERTAR | RLQAQA | -0.899  |
| >gi 38258175 sp Q8NBP7.2  | 97  | EETHLSQSERTARR | LQAQAA | -21.944 |
| >gi 38258175 sp Q8NBP7.2  | 104 | SERTARRLQAQAAR | RGYLTK | -26.294 |
| >gi 38258175 sp Q8NBP7.2  | 105 | ERTARRLQAQAARR | GYLTKI | -23.636 |
| >gi 38258175 sp Q8NBP7.2  | 160 | SSVFAQSIPWNLER | ITPPRY | -42.683 |
| >gi 38258175 sp Q8NBP7.2  | 165 | QSIPWNLERITPPR | YRADEY | -22.924 |
| >gi 38258175 sp Q8NBP7.2  | 167 | IPWNLERITPPRYR | ADEYQP | -27.991 |
| >gi 38258175 sp Q8NBP7.2  | 194 | EVYLLDTSIQSDHR | EIEGRV | -35.236 |
| >gi 38258175 sp Q8NBP7.2  | 199 | DTSIQSDHREIEGR | VMVTDF | -32.141 |
| >gi 38258175 sp Q8NBP7.2  | 215 | VTDFENVPEEDGTR | FHRQAS | -52.369 |
| >gi 38258175 sp Q8NBP7.2  | 237 | DSHGTHLAGVVSGR | DAGVAK | -16.723 |
| >gi 38258175 sp Q8NBP7.2  | 248 | SGRDAGVAKGASMR | SLRVLN | -19.671 |
| >gi 38258175 sp Q8NBP7.2  | 251 | DAGVAKGASMRSLR | VLNCQG | -15.101 |
| >gi 38258175 sp Q8NBP7.2  | 272 | GTVSGTLIGLEFIR | KSQLVQ | -40.319 |
| >gi 38258175 sp Q8NBP7.2  | 295 | PLVLLPLAGGYSR  | VLNAAC | -34.002 |
| >gi 38258175 sp Q8NBP7.2  | 303 | AGGYSRVLNAACQR | LARAGV | -38.172 |
| >gi 38258175 sp Q8NBP7.2  | 306 | YSRVLNAACQRLAR | AGVVLV | -18.498 |
| >gi 38258175 sp Q8NBP7.2  | 319 | RAGVVLVTAAGNFR | DDACLY | -32.722 |
| >gi 38258175 sp Q8NBP7.2  | 357 | QPVTGLTGLTNFGR | CVDLFA | -27.83  |
| >gi 38258175 sp Q8NBP7.2  | 412 | MLSAEPELTLAELR | QRLIHF | -31.94  |
| >gi 38258175 sp Q8NBP7.2  | 414 | SAEPELTLAELRQR | LIHFSA | -35.539 |
| >gi 38258175 sp Q8NBP7.2  | 434 | KDVINEAWFPEDQR | VLTPNL | -43.394 |
| >gi 38258175 sp Q8NBP7.2  | 458 | PPSTHGAGWQLFCR | TVWSAH | -43.222 |
| >gi 38258175 sp Q8NBP7.2  | 469 | FCRTVWSAHSGPTR | MATAIA | -24.84  |
| >gi 38258175 sp Q8NBP7.2  | 476 | AHSGPTRMATAIAR | CAPDEE | -22.609 |
| >gi 38258175 sp Q8NBP7.2  | 491 | APDEELSCSSFSR  | SGKRRG | -32.333 |
| >gi 38258175 sp Q8NBP7.2  | 495 | ELSCSSFSRSGKR  | RGERME | -15.436 |
| >gi 38258175 sp Q8NBP7.2  | 496 | LLSCSSFSRSGKRR | GERMEA | -14.544 |
| >gi 38258175 sp Q8NBP7.2  | 499 | CSSFSRSGKRRGER | MEAQGG | -17.043 |
| >gi 38258175 sp Q8NBP7.2  | 510 | GERMEAQGGKLVCR | AHNAFG | -29.079 |
| >gi 38258175 sp Q8NBP7.2  | 525 | HNAFGGEGVYAIAR | CCLLPQ | -35.42  |
| >gi 38258175 sp Q8NBP7.2  | 549 | VHTAPPAEASMGTR | VHCHQQ | -37.1   |

|                           |     |                 |        |         |
|---------------------------|-----|-----------------|--------|---------|
| >gi 38258175 sp Q8NBP7.2  | 580 | EVEDLGTHKPPVLR  | PRGQPN | -25.037 |
| >gi 38258175 sp Q8NBP7.2  | 582 | EDLGTHKPPVLRPR  | GQPNQC | -20.729 |
| >gi 38258175 sp Q8NBP7.2  | 592 | LRPRGQPNQCVGHR  | EASIHA | -26.14  |
| >gi 38258175 sp Q8NBP7.2  | 657 | VLGAYAVDNTCVVR  | SRDVST | -30.404 |
| >gi 38258175 sp Q8NBP7.2  | 659 | GAYAVDNTCVVRSR  | DVSTTG | -23.4   |
| >gi 38258175 sp Q8NBP7.2  | 680 | TSEEAVTAVAICCR  | SRHLAQ | -31.652 |
| >gi 38258175 sp Q8NBP7.2  | 682 | EEAVTAVAICCRSR  | HLAQAS | -37.03  |
| >gi 117949769 sp Q9QXV0.2 | 27  | GVGILVLLLLGLLR  | LPPTLS | -34.097 |
| >gi 117949769 sp Q9QXV0.2 | 35  | LLGLLRLPPTLSAR  | PVKEPR | -24.077 |
| >gi 117949769 sp Q9QXV0.2 | 41  | LPPTLSARPVKEPR  | SLSAAS | -10.72  |
| >gi 117949769 sp Q9QXV0.2 | 58  | AASAPLVETSTPLR  | LRRAVP | -35.089 |
| >gi 117949769 sp Q9QXV0.2 | 60  | SAPLVETSTPLRLR  | RAVPRG | -24.448 |
| >gi 117949769 sp Q9QXV0.2 | 65  | ETSTPLRLRRVPR   | GEAAGA | -18.46  |
| >gi 117949769 sp Q9QXV0.2 | 77  | PRGEAAGAVQELAR  | ALAHLL | -28.406 |
| >gi 117949769 sp Q9QXV0.2 | 87  | ELARALAHLLAER   | QERARA | -45.267 |
| >gi 117949769 sp Q9QXV0.2 | 90  | RALAHLLAERQER   | ARAEAQ | -22.149 |
| >gi 117949769 sp Q9QXV0.2 | 92  | LAHLLAERQERAR   | AEAQEA | -25.388 |
| >gi 117949769 sp Q9QXV0.2 | 104 | ARAEAQEAEDQQAR  | VLAQLL | -40.881 |
| >gi 117949769 sp Q9QXV0.2 | 111 | AEDQQARVLAQLLR  | AWGSPR | -22.028 |
| >gi 117949769 sp Q9QXV0.2 | 117 | RVLAQLLRVWGSPR  | ASDPPL | -24.891 |
| >gi 117949769 sp Q9QXV0.2 | 138 | PDDDPDAPAAQLAR  | ALLRAR | -17.497 |
| >gi 117949769 sp Q9QXV0.2 | 142 | PDAPAAQLARALLR  | ARLDPA | -19.962 |
| >gi 117949769 sp Q9QXV0.2 | 144 | APAAQLARALLRAR  | LDPAAL | -30.153 |
| >gi 117949769 sp Q9QXV0.2 | 163 | LAAQLVPAPAAAPR  | PRPPVY | -30.284 |
| >gi 117949769 sp Q9QXV0.2 | 165 | AQLVPAPAAAPRPR  | PPVYDD | -24.705 |
| >gi 117949769 sp Q9QXV0.2 | 194 | AGDETPDVDPPELLR | YLLGRI | -37.755 |
| >gi 117949769 sp Q9QXV0.2 | 199 | PDVDPPELLRYLLGR | ILTGSS | -31.788 |
| >gi 117949769 sp Q9QXV0.2 | 214 | LTGSSEPEAAPAPR  | RLRRSV | -23.59  |
| >gi 117949769 sp Q9QXV0.2 | 215 | TGSSEPEAAPAPRR  | LRRSVD | -25.468 |
| >gi 117949769 sp Q9QXV0.2 | 217 | SSEPEAAPAPRRLR  | RSVDQD | 0.605   |
| >gi 117949769 sp Q9QXV0.2 | 239 | PEVPPENVLGALLR  | VKRLN  | -31.974 |
| >gi 117949769 sp Q9QXV0.2 | 242 | PPENVLGALLRVKR  | LENPSP | -15.506 |
| >gi 117949769 sp Q9QXV0.2 | 253 | VKRLNENPSPQAPAR | RLPP-  | -25.763 |
| >gi 117949769 sp Q9QXV0.2 | 254 | KRLNENPSPQAPARR | LLPP-- | -22.722 |
| >gi 12643343 sp Q9Y287.1  | 50  | DCKDPDDVVPVGQR  | RAWCWC | -23.137 |
| >gi 12643343 sp Q9Y287.1  | 51  | CKDPDDVVPVGQRR  | AWCWCM | -15.865 |
| >gi 12643343 sp Q9Y287.1  | 178 | YVIPLNTSIVMPPR  | NLLELL | -31.817 |
| >gi 12643343 sp Q9Y287.1  | 208 | QSYLIHEHMVITDR  | IENIDH | -42.105 |
| >gi 12643343 sp Q9Y287.1  | 221 | RIENIDHLGFFIYR  | LCHDKE | -41.516 |
| >gi 12643343 sp Q9Y287.1  | 233 | YRLCHDKETYKLQR  | RETIKG | -18.572 |
| >gi 12643343 sp Q9Y287.1  | 234 | RLCHDKETYKLQRR  | ETIKGI | 2.721   |
| >gi 12643343 sp Q9Y287.1  | 252 | GIQKREASNCFAIR  | HFENKF | -38.627 |
| >gi 119467 sp P03383.1 EN | 22  | LFSLTHFLAQQR    | CTLTIG | -22.938 |

|                           |     |                |        |         |
|---------------------------|-----|----------------|--------|---------|
| >gi 119467 sp P03383.1 EN | 58  | TWNLDLNSLTDDQR | LHPPCP | -41.347 |
| >gi 119467 sp P03383.1 EN | 90  | SLYLFPHWIKKPNR | QGLGYY | -14.291 |
| >gi 119467 sp P03383.1 EN | 147 | DVNFTQEVSVSLR  | LHFSKC | -32.473 |
| >gi 119467 sp P03383.1 EN | 227 | LQSTNYSCMVCVDR | SSLSSW | -35.056 |
| >gi 119467 sp P03383.1 EN | 250 | YTPNISIPQQTSSR | TILFPS | -35.474 |
| >gi 119467 sp P03383.1 EN | 276 | PSQFPFWTHCYQPR | LQAITT | -37.154 |
| >gi 119467 sp P03383.1 EN | 305 | PPFLAPVPPPATR  | RRRAVP | -30.891 |
| >gi 119467 sp P03383.1 EN | 306 | PFSLAPVPPPATRR | RRAVPI | -19.955 |
| >gi 119467 sp P03383.1 EN | 307 | FSLAPVPPPATRRR | RAVPIA | -15.543 |
| >gi 119467 sp P03383.1 EN | 366 | LTQAIVKNHQNILR | VAQYAA | -30.833 |
| >gi 119467 sp P03383.1 EN | 375 | QNILRVAQYAAQNR | RGLDLL | -31.866 |
| >gi 119467 sp P03383.1 EN | 376 | NILRVAQYAAQNRR | GLDLLF | -11.032 |
| >gi 119467 sp P03383.1 EN | 412 | LNISNTHVSVLQER | PPLEKR | -35.593 |
| >gi 119467 sp P03383.1 EN | 418 | HVSVLQERPPLEKR | VITGWG | -23.055 |
| >gi 119467 sp P03383.1 EN | 436 | WGLNWDLGLSQWAR | EALQTG | -21.266 |
| >gi 119467 sp P03383.1 EN | 461 | LLLLVILFGPCILR | QIQALP | -28.698 |
| >gi 119467 sp P03383.1 EN | 469 | GPCILRQIQALPQR | LQNRHN | -34.432 |
| >gi 119467 sp P03383.1 EN | 473 | LRQIQALPQRLQNR | HNQYSL | -23.164 |
| >gi 24079966 gb AAN46089. | 29  | RWVSLTLTLALCR  | PIQTWR | -33.764 |
| >gi 24079966 gb AAN46089. | 35  | LTLALCRPIQTWR  | CSLSLG | -24.745 |
| >gi 24079966 gb AAN46089. | 77  | EAHNQSPFCAKSPR | YTLDSV | -21.708 |
| >gi 24079966 gb AAN46089. | 97  | NGYPKIYWPPPQGR | RRFGAR | -29.335 |
| >gi 24079966 gb AAN46089. | 98  | GYPKIYWPPPQGRR | RFGARA | -18.363 |
| >gi 24079966 gb AAN46089. | 99  | YPKIYWPPPQGRRR | FGARAM | -15.912 |
| >gi 24079966 gb AAN46089. | 103 | YWPPPQRRRFGAR  | AMVTYD | -19.655 |
| >gi 24079966 gb AAN46089. | 113 | FGARAMVTYDCEPR | CPYVGA | -38.494 |
| >gi 24079966 gb AAN46089. | 121 | YDCEPRCPYVGADR | FDCPHW | -37.643 |
| >gi 24079966 gb AAN46089. | 196 | DFPQLNSDWVPSVR | SWALLL | -31.981 |
| >gi 24079966 gb AAN46089. | 207 | SVRSWALLLNQTAR | AFPDCA | -22.738 |
| >gi 24079966 gb AAN46089. | 267 | SFNTTQGWHHPSQR | LLFNVS | -26.513 |
| >gi 24079966 gb AAN46089. | 298 | LVNLSTASSAPPTR | VRRSPV | -33.772 |
| >gi 24079966 gb AAN46089. | 300 | NLSTASSAPPTRVR | RSPVAA | -23.853 |
| >gi 24079966 gb AAN46089. | 331 | TGINVAVSALSHQR | LTSLIH | -32.318 |
| >gi 24079966 gb AAN46089. | 345 | LTSLIHVLEQDQQR | LITAIN | -46.549 |
| >gi 24079966 gb AAN46089. | 368 | YNLLNVASVVAQNR | RGLDWL | -31.803 |
| >gi 24079966 gb AAN46089. | 369 | NLLNVASVVAQNRR | GLDWLY | -12.792 |
| >gi 24079966 gb AAN46089. | 377 | VAQNRRGLDWLYIR | LGFQSL | -42.756 |
| >gi 24079966 gb AAN46089. | 395 | SLCPTINEPCCFLR | IQNDSI | -40.611 |
| >gi 24079966 gb AAN46089. | 403 | PCCFLRIQNDSIIR | LGDLQP | -41.359 |
| >gi 24079966 gb AAN46089. | 413 | SIIRLGLDQPLSQR | VSTDWQ | -30.241 |
| >gi 24079966 gb AAN46089. | 433 | WPWNWDLGLTAWVR | ETIHSV | -29.321 |
| >gi 24079966 gb AAN46089. | 463 | LFLAPCLIKCLTSR | LLKLLR | -32.679 |
| >gi 24079966 gb AAN46089. | 469 | LKCLTSRLLKLLR  | QAPHFP | -4.884  |

|                           |     |                 |         |         |
|---------------------------|-----|-----------------|---------|---------|
| >gi 24079966 gb AAN46089. | 512 | SHLSPVKPDYINLR  | PCP---  | -38.359 |
| >gi 74667 pir  VCLJST env | 35  | VQYVTVFYGVVWR   | NAS IPL | -29.191 |
| >gi 74667 pir  VCLJST env | 48  | RNAS IPLFCATKNR | DTWG TI | -32.859 |
| >gi 74667 pir  VCLJST env | 111 | KPCVKLPLCVAMR   | CNSTTA  | -34.88  |
| >gi 74667 pir  VCLJST env | 142 | TANTTIGENSSCIR  | TDNCTG  | -40.922 |
| >gi 74667 pir  VCLJST env | 166 | EMVDCQFNMTGLER  | DKKKLY  | -37.279 |
| >gi 74667 pir  VCLJST env | 217 | ITESC DKHYWDTMR | FRYCAP  | -41.427 |
| >gi 74667 pir  VCLJST env | 219 | ESCDKHYWDTMRFR  | YCAPPG  | -41.106 |
| >gi 74667 pir  VCLJST env | 230 | RFRYCAPPGFALLR  | CNDTNY  | -28.537 |
| >gi 74667 pir  VCLJST env | 253 | EPNCSKVVAATCTR  | MMETQT  | -41.876 |
| >gi 74667 pir  VCLJST env | 269 | ETQTSTWFGFNGTR  | AENRTY  | -34.245 |
| >gi 74667 pir  VCLJST env | 273 | STWFGFNGTRAENR  | TYIYWH  | -34.998 |
| >gi 74667 pir  VCLJST env | 281 | TRAENRTYIYWHGR  | DNRTII  | -37.041 |
| >gi 74667 pir  VCLJST env | 284 | ENRTYIYWHGRDNR  | TIISLN  | -23.245 |
| >gi 74667 pir  VCLJST env | 301 | SLNKFYNLTVHCKR  | PGNKTV  | -21.003 |
| >gi 74667 pir  VCLJST env | 325 | LMSGLVFHSQPINR  | RPRQAW  | -30.585 |
| >gi 74667 pir  VCLJST env | 326 | MSGLVFHSQPINRR  | PRQAWC  | -18.596 |
| >gi 74667 pir  VCLJST env | 328 | GLVFHSQPINRRPR  | QAWCWF  | -3.639  |
| >gi 74667 pir  VCLJST env | 354 | AMKEVKLT LAKHPR | YKGTND  | -6.477  |
| >gi 74667 pir  VCLJST env | 365 | HPRYKGTNDTEKIR  | FIALGE  | -39.253 |
| >gi 74667 pir  VCLJST env | 372 | NDTEKIRFIALGER  | SDPEVA  | -39.198 |
| >gi 74667 pir  VCLJST env | 385 | RSDPEVAYMWTNCR  | GEFLYC  | -43.765 |
| >gi 74667 pir  VCLJST env | 403 | YCNMTWFLNWVENR  | TNQTQH  | -39.143 |
| >gi 74667 pir  VCLJST env | 435 | TWHKVGKNVYLPPR  | EGQLTC  | -32.367 |
| >gi 74667 pir  VCLJST env | 472 | TNITFSAEVAELYR  | LELDY   | -45.739 |
| >gi 74667 pir  VCLJST env | 495 | EVTPIGFAPTPVKR  | YSSAPV  | -17.117 |
| >gi 74667 pir  VCLJST env | 502 | APTPVKRYSSAPVR  | NKRGVF  | -26.473 |
| >gi 74667 pir  VCLJST env | 535 | AMGAASLTLSAQSR  | TLLAGI  | -30.59  |
| >gi 74667 pir  VCLJST env | 554 | IVQQQQQLLDVVKR  | QQEMLR  | -17.022 |
| >gi 74667 pir  VCLJST env | 560 | QLLDVVKRQQEMLR  | LTVWGT  | -39.208 |
| >gi 74667 pir  VCLJST env | 572 | LRLTVWGTKNLQAR  | VT AIEK | -25.33  |
| >gi 74667 pir  VCLJST env | 594 | KDQAQLNSWGCASR  | QVCHTT  | -32.5   |
| >gi 74667 pir  VCLJST env | 623 | PDWNNMTWQEWQR   | IRNLEA  | -42.384 |
| >gi 74667 pir  VCLJST env | 625 | WNNMTWQEWQRIR   | NLEANI  | -36.164 |
| >gi 74667 pir  VCLJST env | 685 | QYGVYIVVGIIVLR  | IVIYVV  | -26.133 |
| >gi 74667 pir  VCLJST env | 696 | VLRIVYVVQMLSR   | LRKGYR  | -34.313 |
| >gi 74667 pir  VCLJST env | 698 | RIVYVVQMLSRLR   | KGYRPV  | -32.271 |
| >gi 74667 pir  VCLJST env | 702 | YVVQMLSRLRKGYR  | PVFSSP  | -3.915  |
| >gi 74667 pir  VCLJST env | 721 | PPAYFQQIHIHKDR  | EQPARE  | -14.733 |
| >gi 74667 pir  VCLJST env | 726 | QQIHIHKDREQPAR  | EETEED  | -23.088 |
| >gi 74667 pir  VCLJST env | 747 | GNSVGDNWWPWPIR  | YIHFLI  | -37.843 |
| >gi 74667 pir  VCLJST env | 754 | WWPWPIRYIHFLIR  | QLIRLL  | -34.561 |
| >gi 74667 pir  VCLJST env | 758 | PIRYIHFLIRQLIR  | LLNRLY  | -30.873 |

|                           |     |                 |         |         |
|---------------------------|-----|-----------------|---------|---------|
| >gi 74667 pir  VCLJST env | 762 | IHFLLRQLRLLNR   | LYNICR  | -32.587 |
| >gi 74667 pir  VCLJST env | 768 | QLIRLLNRLYNICR  | DLLSRS  | -35.921 |
| >gi 74667 pir  VCLJST env | 773 | LNRLYNICRDLLSR  | SFQTLQ  | -14.369 |
| >gi 74667 pir  VCLJST env | 786 | RSFQTLQLISQSLR  | RALTAV  | -27.733 |
| >gi 74667 pir  VCLJST env | 787 | SFQTLQLISQSLRR  | ALTAVR  | -14.075 |
| >gi 74667 pir  VCLJST env | 793 | LISQSLRRALTAVR  | DWLRFN  | -29.277 |
| >gi 74667 pir  VCLJST env | 797 | SLRRALTAVRDWLR  | FNTAYL  | -25.739 |
| >gi 74667 pir  VCLJST env | 815 | YLQYGGEWIQEAFR  | AFARAT  | -43.181 |
| >gi 74667 pir  VCLJST env | 819 | GGEWIQEAFRAFAR  | ATGETL  | -19.292 |
| >gi 74667 pir  VCLJST env | 830 | FARATGETLTNAWR  | GFWGTL  | -35.69  |
| >gi 74667 pir  VCLJST env | 841 | AWRGFWGTLGQIGR  | GILAVP  | -23.906 |
| >gi 74667 pir  VCLJST env | 848 | TLGQIGRGILAVPR  | RIRQGA  | -31.886 |
| >gi 74667 pir  VCLJST env | 849 | LGQIGRGILAVPRR  | IRQGAE  | -20.382 |
| >gi 74667 pir  VCLJST env | 851 | QIGRGILAVPRRIR  | QGAEIA  | -7.399  |
| >gi 1722783 sp P52638.1 V | 21  | LIGFGLVLLVLSAR  | TFDLQG  | -32.351 |
| >gi 1722783 sp P52638.1 V | 44  | NTDSTPGLIDLEIR  | RLCHTP  | -40.117 |
| >gi 1722783 sp P52638.1 V | 45  | TDSTPGLIDLEIRR  | LCHTPT  | -34.263 |
| >gi 1722783 sp P52638.1 V | 95  | KTYWGFSGSYSADR  | IINRYT  | -46.014 |
| >gi 1722783 sp P52638.1 V | 99  | GFFGSYSADRIINR  | YGTGTVK | -9.845  |
| >gi 1722783 sp P52638.1 V | 134 | WFYCCSAITTEICR  | CSITNV  | -37.028 |
| >gi 1722783 sp P52638.1 V | 214 | CNSSKIVSFDEFR   | RSYSLT  | -40.365 |
| >gi 1722783 sp P52638.1 V | 215 | NSSSKIVSFDEFRR  | SYSLTN  | -32.97  |
| >gi 1722783 sp P52638.1 V | 241 | SINVTCCANYTSSCR | PRLKRR  | -39.7   |
| >gi 1722783 sp P52638.1 V | 243 | NVTCANYTSSCRPR  | LKRRRR  | -29.491 |
| >gi 1722783 sp P52638.1 V | 246 | CANYTSSCRPRLKR  | RRRDTQ  | 9.884   |
| >gi 1722783 sp P52638.1 V | 247 | ANYTSSCRPRLKRR  | RRDTQQ  | 3.366   |
| >gi 1722783 sp P52638.1 V | 248 | NYTSSCRPRLKRRR  | RDTQQI  | 8.028   |
| >gi 1722783 sp P52638.1 V | 262 | RDTQQIEYLVHKLR  | PTLKDA  | -9.911  |
| >gi 1722783 sp P52638.1 V | 295 | VFGTGIASASQFLR  | SWLNHP  | -23.567 |
| >gi 1722783 sp P52638.1 V | 319 | YIVNGVGVVWQCHR  | VNVTFM  | -39.451 |
| >gi 1722783 sp P52638.1 V | 341 | NESTYPPVDYNGR   | KYFLND  | -41.662 |
| >gi 1722783 sp P52638.1 V | 350 | DYNGRKYFLNDEGR  | LQTNTP  | -40.283 |
| >gi 1722783 sp P52638.1 V | 359 | NDEGRLQNTPEAR   | PGLKRV  | -31.295 |
| >gi 1722783 sp P52638.1 V | 364 | LQNTPEARPGLKR   | VMWFGR  | -28.364 |
| >gi 1722783 sp P52638.1 V | 370 | EARPGLKRVMWFGR  | YFLGTV  | -35.471 |
| >gi 1722783 sp P52638.1 V | 383 | RYFLGTVGSGVKPR  | RIRYNK  | -17.628 |
| >gi 1722783 sp P52638.1 V | 384 | YFLGTVGSGVKPRR  | IRYNKT  | -19.301 |
| >gi 1722783 sp P52638.1 V | 386 | LGTVGSGVKPRRIR  | YNKTSH  | 1.259   |
| >gi 1722783 sp P52638.1 V | 435 | HAYGTQADLLPYTR  | SSNITS  | -24.335 |
| >gi 1722783 sp P52638.1 V | 466 | LPSFAFLNPLGWLR  | DLLAWA  | -26.65  |
| >gi 1722783 sp P52638.1 V | 494 | LISLCVSLPASFAR  | RRRLGR  | -29.818 |
| >gi 1722783 sp P52638.1 V | 495 | ISLCVSLPASFARR  | RRLGRW  | -21.985 |
| >gi 1722783 sp P52638.1 V | 496 | SLCVSLPASFARRR  | RLGRWQ  | -16.622 |

|                           |     |                 |        |         |
|---------------------------|-----|-----------------|--------|---------|
| >gi 1722783 sp P52638.1 V | 497 | LCVSLPASFARRRR  | LGRWQE | -13.046 |
| >gi 1722783 sp P52638.1 V | 500 | SLPASFARRRRRLGR | WQE--- | -10.853 |
| >gi 9629363 ref NP_057856 | 146 | DLKNDTNTNSSSGR  | MIMEKG | -30.347 |
| >gi 9629363 ref NP_057856 | 166 | EIKNCSFNISTSIR  | GKVQKE | -33.669 |
| >gi 9629363 ref NP_057856 | 252 | CTNVSTVQCTHGIR  | PVVSTQ | -35.649 |
| >gi 9629363 ref NP_057856 | 273 | LLNGSLAEEVVIR   | SVNFTD | -31.404 |
| >gi 9629363 ref NP_057856 | 298 | IVQLNTSVEINCTR  | PNNNTR | -43.525 |
| >gi 9629363 ref NP_057856 | 304 | SVEINCTRPNNNTR  | KRIRIQ | -33.985 |
| >gi 9629363 ref NP_057856 | 306 | EINCTRPNNNTRKR  | IRIQRG | -26.905 |
| >gi 9629363 ref NP_057856 | 308 | NCTRPNNNTRKRIR  | IQRGPG | -20.553 |
| >gi 9629363 ref NP_057856 | 315 | NTRKRIRIQRGPGR  | AFVTIG | -22.794 |
| >gi 9629363 ref NP_057856 | 327 | GRAFVTIGKIGNMR  | QAHCNI | -25.644 |
| >gi 9629363 ref NP_057856 | 335 | KIGNMRQAHCNISR  | AKWNNT | -30.508 |
| >gi 9629363 ref NP_057856 | 350 | KWNNTLQIASKLR   | EQFGNN | -29.88  |
| >gi 9629363 ref NP_057856 | 419 | NNTEGSDTITLPCR  | IKQIIN | -40.1   |
| >gi 9629363 ref NP_057856 | 444 | GKAMYAPPISGQIR  | CSSNIT | -33.919 |
| >gi 9629363 ref NP_057856 | 456 | IRCSSNITGLLLTR  | DGGNSN | -25.711 |
| >gi 9629363 ref NP_057856 | 469 | RDGGSNNNESEIFR  | PGGGDM | -44.776 |
| >gi 9629363 ref NP_057856 | 476 | NESEIFRPGGGDMR  | DNWRSE | -35.912 |
| >gi 9629363 ref NP_057856 | 480 | IFRPGGGDMRDNR   | SELYKY | -33.536 |
| >gi 9629363 ref NP_057856 | 503 | KIEPLGVAPTKAKR  | RVVQRE | 4.199   |
| >gi 9629363 ref NP_057856 | 504 | IEPLGVAPTKAKRR  | VVQREK | -15.589 |
| >gi 9629363 ref NP_057856 | 508 | GVAPTKAKRRVVQR  | EKRAVG | 7.772   |
| >gi 9629363 ref NP_057856 | 542 | TMGAASMTLTVQAR  | QLLSGI | -19.347 |
| >gi 9629363 ref NP_057856 | 557 | LLSGIVQQNNLLR   | AIEAQQ | -26.602 |
| >gi 9629363 ref NP_057856 | 579 | LQLTVWGKQLQAR   | ILAVER | -26.458 |
| >gi 9629363 ref NP_057856 | 585 | GKQLQARILAVER   | YLKDQQ | -39.395 |
| >gi 9629363 ref NP_057856 | 633 | EQIWNHTTWMEWDR  | EINNYT | -47.522 |
| >gi 9629363 ref NP_057856 | 696 | KLFIMIVGGLVGLR  | IVFAVL | -28.847 |
| >gi 9629363 ref NP_057856 | 707 | GLRIVFAVLSIVNR  | VRQGYS | -29.865 |
| >gi 9629363 ref NP_057856 | 709 | RIVFAVLSIVNRVR  | QGYSPL | -35.154 |
| >gi 9629363 ref NP_057856 | 725 | YSPLSFQTHLPTPR  | GPDRPE | -19.516 |
| >gi 9629363 ref NP_057856 | 729 | SFQTHLPTPRGPDR  | PEGIEE | -32.206 |
| >gi 9629363 ref NP_057856 | 740 | PDRPEGIEEEGGER  | DRDRSI | -50.838 |
| >gi 9629363 ref NP_057856 | 742 | RPEGIEEEGGERDR  | DRSIRL | -38.504 |
| >gi 9629363 ref NP_057856 | 744 | EGIEEEGGERDRDR  | SIRLVN | -32.518 |
| >gi 9629363 ref NP_057856 | 747 | EEEGGERDRDRSIR  | LVNGSL | -17.778 |
| >gi 9629363 ref NP_057856 | 761 | LVNGSLALIWDLLR  | SLCLFS | -39.146 |
| >gi 9629363 ref NP_057856 | 770 | WDDLRLSLCLFSYHR | LRDLLL | -33.669 |
| >gi 9629363 ref NP_057856 | 772 | DLRSLCLFSYHRLR  | DLLLIV | -14.008 |
| >gi 9629363 ref NP_057856 | 780 | SYHRLRDLIVTR    | IVELLG | -24.084 |
| >gi 9629363 ref NP_057856 | 787 | LLIVTRIVELLGR   | RGWEAL | -37.052 |
| >gi 9629363 ref NP_057856 | 788 | LLIVTRIVELLGRR  | GWEALK | -26.172 |

|                           |     |                 |        |         |
|---------------------------|-----|-----------------|--------|---------|
| >gi 9629363 ref NP_057856 | 828 | LNATAIAVAEGTDR  | VIEVVQ | -45.801 |
| >gi 9629363 ref NP_057856 | 838 | GTDRVIEVVQGACR  | AIRHIP | -33.355 |
| >gi 9629363 ref NP_057856 | 841 | RVIEVVQGACRAIR  | HIPRRI | -23.225 |
| >gi 9629363 ref NP_057856 | 845 | VVQGACRAIRHIPR  | RIRQGL | -5.503  |
| >gi 9629363 ref NP_057856 | 846 | VQGACRAIRHIPRR  | IRQGLE | -14.834 |
| >gi 9629363 ref NP_057856 | 848 | GACRAIRHIPRRIR  | QGLERI | -6.367  |
| >gi 9629363 ref NP_057856 | 853 | IRHIPRRIRQGLER  | ILL--- | -33.008 |
| >gi 138252 sp P12568.1 FU | 49  | TCSAVSKGYLSALR  | TGWYTS | -36.711 |
| >gi 138252 sp P12568.1 FU | 106 | LQLLMQSTPAANNR  | ARRELP | -28.288 |
| >gi 138252 sp P12568.1 FU | 108 | LLMQSTPAANNRAR  | RELPRF | -30.652 |
| >gi 138252 sp P12568.1 FU | 109 | LMQSTPAANNRARR  | ELPRFM | 11.385  |
| >gi 138252 sp P12568.1 FU | 113 | TPAANNRARRELPR  | FMNYTL | -18.822 |
| >gi 138252 sp P12568.1 FU | 133 | NNTKKTNVTLSSKKR | KRRFLG | -23.547 |
| >gi 138252 sp P12568.1 FU | 135 | TKKTNVTLSSKKRKR | RFLGFL | 5.466   |
| >gi 138252 sp P12568.1 FU | 213 | DKQLLPVINKQSCR  | ISNIET | -28.389 |
| >gi 138252 sp P12568.1 FU | 229 | NIETVIEFQQKNNR  | LLEITR | -27.192 |
| >gi 138252 sp P12568.1 FU | 235 | EFQQKNNRLEITR   | EFSVNA | -31.183 |
| >gi 138252 sp P12568.1 FU | 282 | DQKKLMSNNVQIVR  | QQSYSI | -26.676 |
| >gi 138252 sp P12568.1 FU | 336 | TTNTKEGSNICLTR  | TDRGWY | -34.733 |
| >gi 138252 sp P12568.1 FU | 339 | TKEGSNICLTRTDR  | GWYCDN | -19.678 |
| >gi 138252 sp P12568.1 FU | 364 | FFPQAETCKVQSNR  | VFCDTM | -26.987 |
| >gi 138252 sp P12568.1 FU | 429 | CYGKTKCTASNKNR  | GIKTF  | -23.73  |
| >gi 138252 sp P12568.1 FU | 507 | QVNEKINQSLAFIR  | KSDELL | -34.625 |
| >gi 138252 sp P12568.1 FU | 553 | SLIAVGLLLYCKAR  | STPRTL | -27.994 |
| >gi 138261 sp P06156.1 FU | 35  | VLSCICPANSIDGR  | PLAAAG | -29.872 |
| >gi 138261 sp P06156.1 FU | 86  | KEACAKAPLDAYNR  | TLTLL  | -41.499 |
| >gi 138261 sp P06156.1 FU | 100 | TLTLLTPLGDSIR   | RIQESV | -34.972 |
| >gi 138261 sp P06156.1 FU | 101 | LTTLLTPLGDSIRR  | IQESVT | -29.979 |
| >gi 138261 sp P06156.1 FU | 112 | IRRIQESVTTSGGR  | RQKRFI | -31.242 |
| >gi 138261 sp P06156.1 FU | 113 | RRIQESVTTSGRR   | QKRFIG | -17.096 |
| >gi 138261 sp P06156.1 FU | 153 | ALIQAQNAANILR   | LKESIA | -32.168 |
| >gi 138261 sp P06156.1 FU | 201 | DQFNKTAQELGCIR  | IAQQVG | -42.369 |
| >gi 138261 sp P06156.1 FU | 299 | QVTLPVSVGNLNNMR | ATYLET | -32.862 |
| >gi 138261 sp P06156.1 FU | 312 | RATYLETLSVSTTR  | GFASAL | -26.857 |
| >gi 138261 sp P06156.1 FU | 349 | SYCIETDLDYCTR   | IVTFPM | -44.225 |
| >gi 138261 sp P06156.1 FU | 400 | KGSVIANCKMTTCR  | CVNPPG | -25.287 |
| >gi 138261 sp P06156.1 FU | 435 | QSCNVLSLDGITLR  | LSGEFD | -29.232 |
| >gi 138261 sp P06156.1 FU | 548 | TLLWLGNNTLDQMR  | ATTKM- | -32.1   |
| >gi 138273 sp P06828.2 FU | 47  | SPKGMKISQNFETR  | YLILSL | -32.436 |
| >gi 138273 sp P06828.2 FU | 73  | SNSCGDQQIKQYKR  | LLDRLI | -22.138 |
| >gi 138273 sp P06828.2 FU | 77  | GDQQIKQYKRLLDR  | LIIPLY | -28.91  |
| >gi 138273 sp P06828.2 FU | 87  | LLDRLIIPLYDGLR  | LQKDVI | -42.542 |
| >gi 138273 sp P06828.2 FU | 106 | IVSNQESNENTDPR  | TKRFFG | -38.071 |



|                           |     |                |        |         |
|---------------------------|-----|----------------|--------|---------|
| >gi 138273 sp P06828.2 FU | 141 | ITAAVALVEAKQAR | SDIEKL | -10.046 |
| >gi 138273 sp P06828.2 FU | 152 | QARSDIEKLKEAIR | DTNKAV | -25.639 |
| >gi 138273 sp P06828.2 FU | 189 | QDYVNKEIVPSIAR | LGCEAA | -32.607 |
| >gi 138273 sp P06828.2 FU | 236 | EKGIKLQGIASLYR | TNITEI | -39.276 |
| >gi 138273 sp P06828.2 FU | 265 | DIYDLLFTESIKVR | VIDVDL | -30.93  |
| >gi 138273 sp P06828.2 FU | 281 | DVDLNDYSITLQVR | LPLLTR | -38.001 |
| >gi 138273 sp P06828.2 FU | 287 | YSITLQVRLPLLTR | LLNTQI | -29.68  |
| >gi 138273 sp P06828.2 FU | 295 | LPLLTRLLNTQIYR | VDSISY | -37.902 |
| >gi 138273 sp P06828.2 FU | 306 | IYRVDSISYNIQNR | EWYIPL | -26.832 |
| >gi 138273 sp P06828.2 FU | 365 | MESCLSGNISQCPR | TVVKSD | -36.467 |
| >gi 138273 sp P06828.2 FU | 375 | QCPRTVVKSDIVPR | YAFVNG | -24.211 |
| >gi 138273 sp P06828.2 FU | 400 | CITTCTCNGIGNR  | INQPPD | -32.114 |
| >gi 138273 sp P06828.2 FU | 475 | KAKSDLEESKEWIR | RSNQKL | -28.933 |
| >gi 138273 sp P06828.2 FU | 476 | AKSDLEESKEWIRR | SNQKLD | -13.827 |
| >gi 138273 sp P06828.2 FU | 520 | INVTIIIIVKYYR  | IQKRNK | -32.289 |
| >gi 138273 sp P06828.2 FU | 524 | IIIVKYYRIQKR   | NRVDQN | 3.843   |
| >gi 138273 sp P06828.2 FU | 526 | IIIVKYYRIQKRNK | VDQNDK | -27.665 |
| >gi 18700321 dbj BAB85129 | 35  | ALGCVHLTSSLDGR | PLAAAG | -33.584 |
| >gi 18700321 dbj BAB85129 | 86  | KEACAKAPLEAYNR | TLTLL  | -39.262 |
| >gi 18700321 dbj BAB85129 | 100 | TLTLLTPLGDSIR  | RIQESV | -34.972 |
| >gi 18700321 dbj BAB85129 | 101 | LTTLLTPLGDSIRR | IQESVT | -29.979 |
| >gi 18700321 dbj BAB85129 | 112 | IRRIQESVTTSGGR | RQRRFI | -31.572 |
| >gi 18700321 dbj BAB85129 | 113 | RRIQESVTTSGGRR | QRRFIG | -19.324 |
| >gi 18700321 dbj BAB85129 | 115 | IQESVTTSGGRRQR | RFIGAI | -4.344  |
| >gi 60416260 sp P69353.1  | 48  | VVGIGSASYKVMTR | SSHQSL | -5.218  |
| >gi 60416260 sp P69353.1  | 70  | KLMPNITLLNNCTR | VEIAEY | -41.68  |
| >gi 60416260 sp P69353.1  | 77  | LLNNCTRVEIAEYR | RLLRV  | -39.404 |
| >gi 60416260 sp P69353.1  | 78  | LNNCTRVEIAEYRR | LLRTVL | -32.305 |
| >gi 60416260 sp P69353.1  | 81  | CTRVEIAEYRLLR  | TVLEPI | 3.039   |
| >gi 60416260 sp P69353.1  | 88  | EYRLLRRTVLEPIR | DALNAM | -33.422 |
| >gi 60416260 sp P69353.1  | 99  | PIRDALNAMTQNIR | PVQSVA | -32.989 |
| >gi 60416260 sp P69353.1  | 108 | TQNIRPVQSVASSR | RHKRFA | -30.73  |
| >gi 60416260 sp P69353.1  | 109 | QNIRPVQSVASSRR | HKRFA  | -17.315 |
| >gi 60416260 sp P69353.1  | 151 | HQSMLNSQAIDNLR | ASLETT | -28.211 |
| >gi 60416260 sp P69353.1  | 165 | ASLETTNQAIEAIR | QAGQEM | -31.993 |
| >gi 60416260 sp P69353.1  | 208 | CDLIGQKLGLKLLR | YYTEIL | -14.477 |
| >gi 60416260 sp P69353.1  | 222 | YYTEILSLFGPSLR | DPISAE | -27.532 |
| >gi 60416260 sp P69353.1  | 263 | GYSGGDLLGILESR | GIKARI | -26.104 |
| >gi 60416260 sp P69353.1  | 268 | DLLGILESRGIKAR | ITHVDT | -16.061 |
| >gi 60416260 sp P69353.1  | 298 | YPTLSEIKGVIVHR | LEGVSY | -29.804 |
| >gi 60416260 sp P69353.1  | 360 | ALYPMSPLLQECLR | GSTKSC | -35.524 |
| >gi 60416260 sp P69353.1  | 368 | LQECLRGSTKSCAR | TLVSGS | -29.961 |
| >gi 60416260 sp P69353.1  | 378 | SCARTLVSGSFGNR | FILSQG | -28.2   |

|                           |     |                |        |         |
|---------------------------|-----|----------------|--------|---------|
| >gi 60416260 sp P69353.1  | 435 | VVEVNGVTIQVGSR | RYPDAV | -35.992 |
| >gi 60416260 sp P69353.1  | 436 | VEVNGVTIQVGSRR | YPDAVY | -17.902 |
| >gi 60416260 sp P69353.1  | 445 | VGSRRYPDAVYLHR | IDLGPP | -31.937 |
| >gi 60416260 sp P69353.1  | 456 | LHRIDLGPPISLER | LDVGTN | -40.759 |
| >gi 60416260 sp P69353.1  | 485 | DAKELLESSDQILR | SMKGLS | -32.518 |
| >gi 60416260 sp P69353.1  | 518 | GGLIGIPALICCCR | GRCNKK | -39.671 |
| >gi 60416260 sp P69353.1  | 520 | LIGIPALICCCRGR | CNKKGE | -41.231 |
| >gi 60416260 sp P69353.1  | 532 | GRCNKKGEQVGMSR | PGLKPD | -31.683 |
| >gi 60416260 sp P69353.1  | 548 | LKPDLTGTSKSYVR | SL---- | -18.116 |
| >gi 21326945 gb AAM48106. | 28  | CGLGETHGSNETR  | HNKTD  | -27.776 |
| >gi 21326945 gb AAM48106. | 126 | STQTAGGTSAPTNR | TSLPNS | -28.768 |
| >gi 21326945 gb AAM48106. | 147 | STPSTPQDTHHPVR | NLLSVT | -9.237  |
| >gi 21326945 gb AAM48106. | 182 | ESSATSSPHVSNR  | PPTPPA | -20.878 |
| >gi 21326945 gb AAM48106. | 244 | PITVQDTHPSPTNR | SKRNLK | -20.048 |
| >gi 21326945 gb AAM48106. | 270 | LSQGLKKYYGKILR | LLQLTL | -23.487 |
| >gi 21326945 gb AAM48106. | 289 | LEEDTEGLLEWCKR | NLGLDC | -25.508 |
| >gi 21326945 gb AAM48106. | 303 | NLGLDCDDTFFQKR | IEEFFI | -30.337 |
| >gi 21326945 gb AAM48106. | 322 | ITGEGHFNEVLQFR | TPGTLS | -42.44  |
| >gi 21326945 gb AAM48106. | 379 | GTSNSGLQLINITR | HSTRIV | -26.638 |
| >gi 21326945 gb AAM48106. | 383 | SGLQLINITRHSTR | IVDTPG | -17.674 |
| >gi 21326945 gb AAM48106. | 412 | NCINLKASIFKEHR | EVEINV | -23.343 |
| >gi 21326945 gb AAM48106. | 450 | HVCDYSLDIDGAVR | LPHIYH | -41.033 |
| >gi 21326945 gb AAM48106. | 478 | YKIVIDKKNKLNDR | CTLFTD | -30.322 |
| >gi 21326945 gb AAM48106. | 490 | DRCTLFTDCVIKGR | EVRKGQ | -23.189 |
| >gi 21326945 gb AAM48106. | 493 | TLFTDCVIKGREVR | KGQSVL | -17.748 |
| >gi 21326945 gb AAM48106. | 500 | IKGREVRKGQSVLR | QYKTEI | -32.192 |
| >gi 21326945 gb AAM48106. | 507 | KGQSVLRQYKTEIR | IGKAST | -35.049 |
| >gi 21326945 gb AAM48106. | 516 | KTEIRIGKASTGSR | RLLSEE | -26.929 |
| >gi 21326945 gb AAM48106. | 517 | TEIRIGKASTGSRR | LLSEEP | -19.411 |
| >gi 21326945 gb AAM48106. | 530 | RLLSEEPSDDCISR | TQLLRT | -49.768 |
| >gi 21326945 gb AAM48106. | 535 | EPSDDCISRTQLLR | TETAEI | -28.12  |
| >gi 21326945 gb AAM48106. | 565 | KITICNGSTIVDQR | LGSELG | -32.959 |
| >gi 21326945 gb AAM48106. | 577 | QRLGSELGTYTINR | VRSFKL | -39.82  |
| >gi 21326945 gb AAM48106. | 579 | LGSELGTYTINRVR | SFKLCE | -25.632 |
| >gi 21326945 gb AAM48106. | 603 | GKNCEIDSVPVKCR | QGYCLR | -26.154 |
| >gi 21326945 gb AAM48106. | 609 | DSVPVKCRQGYCLR | ITQEGR | -37.737 |
| >gi 21326945 gb AAM48106. | 615 | CRQGYCLRITQEGR | GHVKLS | -37.236 |
| >gi 21326945 gb AAM48106. | 622 | RITQEGRGHVKLSR | GSEVVL | 2.168   |
| >gi 21326945 gb AAM48106. | 682 | KIPLLGKMAIYICR | MSNHPK | -31.786 |
| >gi 21326945 gb AAM48106. | 724 | IFYLLIIVGTLGKR | LKQYRE | -27.465 |
| >gi 21326945 gb AAM48106. | 729 | IIVGTLGKRLKQYR | ELKPQT | 0.444   |
| >gi 21326945 gb AAM48106. | 767 | LNCSYNICPYCASR | LTSDGL | -36.044 |
| >gi 21326945 gb AAM48106. | 775 | PYCASRLTSDGLAR | HVIQCP | -29.966 |

|                           |      |                 |         |         |
|---------------------------|------|-----------------|---------|---------|
| >gi 21326945 gb AAM48106. | 783  | SDGLARHVIQCPKR  | KEKVEE  | -29.728 |
| >gi 21326945 gb AAM48106. | 798  | EKVEETELYLNLER  | IPWVVR  | -44.007 |
| >gi 21326945 gb AAM48106. | 804  | ELYLNLERIPWVVR  | KLLQVS  | -35.151 |
| >gi 21326945 gb AAM48106. | 819  | LLQVSESTGVALKR  | SSWLIV  | -13.31  |
| >gi 21326945 gb AAM48106. | 852  | SAPIGQGKTIEAYR  | AREGYT  | -35.604 |
| >gi 21326945 gb AAM48106. | 854  | PIGQGKTIEAYRAR  | EGYTSI  | -31.135 |
| >gi 21326945 gb AAM48106. | 923  | HKCYCSLFCCPYCR  | HCSTDK  | -45.039 |
| >gi 21326945 gb AAM48106. | 942  | KEIHKLHLSICKKR  | KKGSNV  | -21.494 |
| >gi 21326945 gb AAM48106. | 959  | SNVMLAVCKLMCFR  | ATMEVS  | -31.238 |
| >gi 21326945 gb AAM48106. | 967  | KLMCFRATMEVSNR  | ALFIRS  | -26.362 |
| >gi 21326945 gb AAM48106. | 972  | RATMEVSNRALFIR  | SIINTT  | -11.495 |
| >gi 21326945 gb AAM48106. | 1008 | AVEMENLPAGTWER  | EEDLTN  | -40.877 |
| >gi 21326945 gb AAM48106. | 1037 | ETECLCPYEALVLR  | KPLFLD  | -39.024 |
| >gi 21326945 gb AAM48106. | 1096 | TANIALSWSSVEHR  | GNKILV  | -20.536 |
| >gi 21326945 gb AAM48106. | 1105 | SVEHRGNKILVSGR  | SESIMK  | -28.446 |
| >gi 21326945 gb AAM48106. | 1115 | VSGRSESIMKLEER  | TGISWD  | -38.79  |
| >gi 21326945 gb AAM48106. | 1155 | QMYSVPVFEYLSGDR | QVGEWP  | -38.224 |
| >gi 21326945 gb AAM48106. | 1172 | EWPKATCTGDPPER  | CGCTSS  | -45.78  |
| >gi 21326945 gb AAM48106. | 1189 | TSSTCLHKEWPHSR  | NWRCNP  | -40.725 |
| >gi 21326945 gb AAM48106. | 1192 | TCLHKEWPHSRNWR  | CNPTWC  | -14.906 |
| >gi 21326945 gb AAM48106. | 1244 | TEAIVCVELTSQER  | QCSLIE  | -38.041 |
| >gi 21326945 gb AAM48106. | 1254 | SQERQCSLIEAGTR  | FNLGPV  | -40.33  |
| >gi 21326945 gb AAM48106. | 1268 | FNLGPVTITLSEPR  | NIQQKL  | -27.244 |
| >gi 21326945 gb AAM48106. | 1284 | QQKLPPEIITLHPR  | IEEGFF  | -37.887 |
| >gi 21326945 gb AAM48106. | 1401 | ETDYTKNFHFHSKR  | VTAHGD  | -16.693 |
| >gi 21326945 gb AAM48106. | 1416 | TAHGDTQPQLDKAR  | PTYGAG  | -31.51  |
| >gi 21326945 gb AAM48106. | 1467 | GCYACSSGISCKVR  | IHVDEP  | -39.026 |
| >gi 21326945 gb AAM48106. | 1497 | DPDVVAASSLMAR   | KLEFGT  | -28.88  |
| >gi 21326945 gb AAM48106. | 1525 | AMPKTSLCFYIVER  | EHCKSC  | -42.615 |
| >gi 21326945 gb AAM48106. | 1618 | PFILLILFFMFGWR  | ILFCFK  | -45.63  |
| >gi 21326945 gb AAM48106. | 1627 | MFGWRILFCFKCCR  | RTRGLF  | -38.335 |
| >gi 21326945 gb AAM48106. | 1628 | FGWRILFCFKCCR   | TRGLFK  | -30.474 |
| >gi 21326945 gb AAM48106. | 1630 | WRILFCFKCCRTR   | GLFKYR  | -21.678 |
| >gi 21326945 gb AAM48106. | 1636 | FKCCRTRGLFKYR   | HLKDDE  | -27.917 |
| >gi 21326945 gb AAM48106. | 1647 | KYRHLKDDEETGYR  | RIIEKL  | -47.145 |
| >gi 21326945 gb AAM48106. | 1648 | YRHLKDDEETGYRR  | IIEKLN  | -30.006 |
| >gi 21326945 gb AAM48106. | 1667 | NNKKGKNKLLDGER  | LARRRI  | -44.328 |
| >gi 21326945 gb AAM48106. | 1671 | GKNKLLDGERLADR  | RIAEFL  | -35.471 |
| >gi 21326945 gb AAM48106. | 1672 | KNKLLDGERLADRR  | IAELFS  | -23.116 |
| >gi 138192 sp P06473.1 GB | 43   | HATSSTHNGSHTSR  | T TSAQT | -11.606 |
| >gi 138192 sp P06473.1 GB | 50   | NGSHTSRTTSAQTR  | SVYSQH  | -18.602 |
| >gi 138192 sp P06473.1 GB | 66   | YSQHVTSSSEAVSHR | ANETIY  | -23.493 |
| >gi 138192 sp P06473.1 GB | 92   | GDVVGVNNTTKYPYR | VCSMAQ  | -34.625 |

|                           |     |                 |        |         |
|---------------------------|-----|-----------------|--------|---------|
| >gi 138192 sp P06473.1 GB | 104 | YRVCSMAQGTDLIR  | FERNII | -39.657 |
| >gi 138192 sp P06473.1 GB | 107 | CSMAQGTDLIRFER  | NIICTS | -18.975 |
| >gi 138192 sp P06473.1 GB | 131 | NEDLDEGIMVVYKR  | NIVAHT | -17.404 |
| >gi 138192 sp P06473.1 GB | 141 | VYKRNIVAHTFKVR  | VYQKVL | -35.097 |
| >gi 138192 sp P06473.1 GB | 150 | TFKVRVYQKVLTFR  | RSYAYI | -24.813 |
| >gi 138192 sp P06473.1 GB | 151 | FKVRVYQKVLTFRR  | SYAYIY | -22.164 |
| >gi 138192 sp P06473.1 GB | 191 | HINKFAQCYSSYSR  | VIGGTV | -36.352 |
| >gi 138192 sp P06473.1 GB | 203 | SRVIGGTVFVAYHR  | DSYENK | -28.82  |
| >gi 138192 sp P06473.1 GB | 225 | QLIPDDYSNTHSTR  | YVTVKD | -10.358 |
| >gi 138192 sp P06473.1 GB | 236 | STRYVTVKDQWHSR  | GSTWLY | -32.989 |
| >gi 138192 sp P06473.1 GB | 243 | KDQWHSRGSTWLYR  | ETCNLN | -27.653 |
| >gi 138192 sp P06473.1 GB | 258 | TCNLNCMLTITTAR  | SKYPYH | -21.214 |
| >gi 138192 sp P06473.1 GB | 285 | DVVYISPFYNGTNR  | NASYFG | -29.384 |
| >gi 138192 sp P06473.1 GB | 311 | FIFPNYTIIVSDFGR | PNAAPE | -37.173 |
| >gi 138192 sp P06473.1 GB | 320 | SDFGRPNAAPETHR  | LVAFLE | -30.803 |
| >gi 138192 sp P06473.1 GB | 327 | AAPETHRLVAFLE   | ADSVIS | -34.517 |
| >gi 138192 sp P06473.1 GB | 354 | NVTCQLTFWEASER  | TIRSEA | -44.497 |
| >gi 138192 sp P06473.1 GB | 357 | CQLTFWEASERTIR  | SEAEDS | -9.708  |
| >gi 138192 sp P06473.1 GB | 393 | QEVNMSDSALDCVR  | DEAINK | -41.712 |
| >gi 138192 sp P06473.1 GB | 444 | WQGIKQKSLVELER  | LANRSS | -41.784 |
| >gi 138192 sp P06473.1 GB | 448 | KQKSLVELERLANR  | SSLNIT | -12.796 |
| >gi 138192 sp P06473.1 GB | 456 | ERLANRSSLNITHR  | TRRSTS | -25.605 |
| >gi 138192 sp P06473.1 GB | 458 | LANRSSLNITHRTR  | RSTSDN | -9.982  |
| >gi 138192 sp P06473.1 GB | 491 | LVYAQLQFTYDTLR  | GYINRA | -41.847 |
| >gi 138192 sp P06473.1 GB | 496 | LQFTYDTLRGYINR  | ALAQIA | -18.769 |
| >gi 138192 sp P06473.1 GB | 510 | ALAQIAEAWCVDQR  | RTLEVF | -38.036 |
| >gi 138192 sp P06473.1 GB | 511 | LAQIAEAWCVDQRR  | TLEVFK | -30.55  |
| >gi 138192 sp P06473.1 GB | 539 | AILSAINKPIAAR   | FMGDVL | -10.879 |
| >gi 138192 sp P06473.1 GB | 562 | SCVTINQTSVKVLR  | DMNVKE | -10.573 |
| >gi 138192 sp P06473.1 GB | 572 | KVLRDMNVKESPGR  | CYSRPV | -32.682 |
| >gi 138192 sp P06473.1 GB | 576 | DMNVKESPGRCYSR  | PVVIFN | -22.841 |
| >gi 138192 sp P06473.1 GB | 606 | QLGEDNEILLGNHR  | TEECQL | -34.062 |
| >gi 138192 sp P06473.1 GB | 634 | GNSAYEYVDYLFKR  | MIDLSS | -31.201 |
| >gi 138192 sp P06473.1 GB | 661 | IALDIDPLENTDFR  | VLELYS | -45.954 |
| >gi 138192 sp P06473.1 GB | 672 | DFRVLELYSQKELR  | SSNVFD | -14.75  |
| >gi 138192 sp P06473.1 GB | 684 | LRSSNVFDLEEIMR  | EFNSYK | -41.077 |
| >gi 138192 sp P06473.1 GB | 692 | LEEIMREFNSYKQR  | VKYVED | -31.411 |
| >gi 138192 sp P06473.1 GB | 773 | AIAVVIITYLIYTR  | QRRRCT | -29.671 |
| >gi 138192 sp P06473.1 GB | 775 | AVVIITYLIYTRQR  | RLCTQP | -30.605 |
| >gi 138192 sp P06473.1 GB | 776 | VVIITYLIYTRQRR  | LCTQPL | -15.119 |
| >gi 138192 sp P06473.1 GB | 822 | APPSYEESVYNSGR  | KGPGPP | -34.553 |
| >gi 138192 sp P06473.1 GB | 853 | TNEQAYQMLLALAR  | LDAEQR | -31.674 |
| >gi 138192 sp P06473.1 GB | 859 | QMLLALARLDAEQR  | AQQNGT | -33.83  |

|                           |     |                 |         |         |
|---------------------------|-----|-----------------|---------|---------|
| >gi 138192 sp P06473.1 GB | 886 | GTQDKGQKPNLLDR  | LRHRKN  | -40.142 |
| >gi 138192 sp P06473.1 GB | 888 | QDKGQKPNLLDRLR  | HRKNGY  | -31.849 |
| >gi 138192 sp P06473.1 GB | 890 | KGQKPNLLDRLRHR  | KNGYRH  | -28.215 |
| >gi 138192 sp P06473.1 GB | 895 | NLLDRLRHRKNGYR  | HLKDSD  | -21.169 |
| >gi 21702651 gb AAM76034. | 29  | RTSFFLWVILFQR   | TFSIPL  | -40.707 |
| >gi 21702651 gb AAM76034. | 54  | STLQVSDVDKLVCR  | DKLSST  | -31.384 |
| >gi 21702651 gb AAM76034. | 64  | LVCRDKLSSTNQLR  | PVGLNL  | -25.799 |
| >gi 21702651 gb AAM76034. | 85  | GNGVATDVPSATKR  | WGFRSG  | -21.328 |
| >gi 21702651 gb AAM76034. | 89  | ATDVPSATKRWGFR  | SGVPPK  | -20.539 |
| >gi 21702651 gb AAM76034. | 130 | DGSECLPAAPDGIR  | GFPRCR  | -37.344 |
| >gi 21702651 gb AAM76034. | 134 | CLPAAPDGIRGFPR  | CRYVHK  | -28.084 |
| >gi 21702651 gb AAM76034. | 136 | PAAPDGIRGFPRCR  | YVHKVS  | -29.967 |
| >gi 21702651 gb AAM76034. | 164 | FAFHKEGAFFLYDR  | LASTVI  | -46.811 |
| >gi 21702651 gb AAM76034. | 172 | FFLYDRLASTVIYR  | GTTFAE  | -22.753 |
| >gi 21702651 gb AAM76034. | 200 | PQAKKDFSSHPLR   | EPVNAT  | -8.079  |
| >gi 21702651 gb AAM76034. | 219 | TEDPSSGYSTTIR   | YQATGF  | -33.137 |
| >gi 21702651 gb AAM76034. | 247 | FEVDNLTYVQLEPR  | FTPQFL  | -26.769 |
| >gi 21702651 gb AAM76034. | 266 | LLQLNETIYTSGKR  | SNTTGK  | -19.97  |
| >gi 21702651 gb AAM76034. | 299 | GEWAFWETKKNLTR  | KIRSEE  | -23.25  |
| >gi 21702651 gb AAM76034. | 302 | AFWETKKNLTRKIR  | SEELSF  | -1.011  |
| >gi 21702651 gb AAM76034. | 325 | SNGAKNISGQSPAR  | TSSDPG  | -30.823 |
| >gi 21702651 gb AAM76034. | 358 | ENSSAMVQVHSQGR  | EAAVSH  | -22.593 |
| >gi 21702651 gb AAM76034. | 409 | LDISEATQVEQHHR  | RTDNDS  | -27.668 |
| >gi 21702651 gb AAM76034. | 410 | DISEATQVEQHHR   | TDNDST  | -15.287 |
| >gi 21702651 gb AAM76034. | 497 | NTIAGVAGLITGGR  | RTRREA  | -30.043 |
| >gi 21702651 gb AAM76034. | 498 | TIAGVAGLITGRR   | TRREAI  | -25.592 |
| >gi 21702651 gb AAM76034. | 500 | AGVAGLITGRRRTR  | REAIVN  | -7.961  |
| >gi 21702651 gb AAM76034. | 559 | GLMHNQDGLICGLR  | QLANET  | -26.376 |
| >gi 21702651 gb AAM76034. | 574 | LANETTQALQLFLR  | ATTELRL | -25.273 |
| >gi 21702651 gb AAM76034. | 580 | QALQLFLRATTELRL | TFSILN  | -36.489 |
| >gi 21702651 gb AAM76034. | 587 | RATTELRTFSILNR  | KAIDFL  | -27.836 |
| >gi 21702651 gb AAM76034. | 596 | SILNRKAIDFLLQR  | WGGTCH  | -41.39  |
| >gi 21702651 gb AAM76034. | 649 | PDQGDNDNWWTGWR  | QWIPAG  | -43.603 |
| >gi 3253216 gb AAC24346.1 | 30  | KTSFLVWVILFQR   | AISMPL  | -31.919 |
| >gi 3253216 gb AAC24346.1 | 55  | STLKATEIDQLVCR  | DKLSST  | -39.794 |
| >gi 3253216 gb AAC24346.1 | 86  | GNGIATDVPSATKR  | WGFRSG  | -21.37  |
| >gi 3253216 gb AAC24346.1 | 90  | ATDVPSATKRWGFR  | SGVPPK  | -20.539 |
| >gi 3253216 gb AAC24346.1 | 131 | DGSECLPLPPDGVR  | GFPRCR  | -33.391 |
| >gi 3253216 gb AAC24346.1 | 135 | CLPLPPDGVRGFPR  | CRYVHK  | -22.759 |
| >gi 3253216 gb AAC24346.1 | 137 | PLPPDGVRGFPRCR  | YVHKVQ  | -29.967 |
| >gi 3253216 gb AAC24346.1 | 165 | LAFHKNGAFFLYDR  | LASTVI  | -46.787 |
| >gi 3253216 gb AAC24346.1 | 173 | FFLYDRLASTVIYR  | GTTFAE  | -22.753 |
| >gi 3253216 gb AAC24346.1 | 247 | LFKVDNHTYVQLDR  | PHTPQF  | -41.495 |

|                           |     |                 |         |         |
|---------------------------|-----|-----------------|---------|---------|
| >gi 3253216 gb AAC24346.1 | 262 | HTPQFLVQLNETLR  | RNNRLS  | -32.117 |
| >gi 3253216 gb AAC24346.1 | 263 | TPQFLVQLNETLRR  | NNRLSN  | -24.213 |
| >gi 3253216 gb AAC24346.1 | 266 | FLVQLNETLRRNRR  | LSNSTG  | -12.612 |
| >gi 3253216 gb AAC24346.1 | 273 | TLRRNNRLSNSTGR  | LTWTLD  | -31.441 |
| >gi 3253216 gb AAC24346.1 | 359 | TDSPPVVSVLTAGR  | TEEMST  | -35.282 |
| >gi 3253216 gb AAC24346.1 | 498 | NTVSKVADSLSPTR  | KQKRSV  | -33.781 |
| >gi 3253216 gb AAC24346.1 | 505 | DSLSPTRKQKRSVR  | QNTANK  | 6.274   |
| >gi 3253216 gb AAC24346.1 | 560 | GVMHNNQGLICGLR  | QLANET  | -26.376 |
| >gi 3253216 gb AAC24346.1 | 575 | LANETTQALQLFLR  | ATTELRL | -25.273 |
| >gi 3253216 gb AAC24346.1 | 581 | QALQLFLRATTELRL | TYSLLN  | -39.931 |
| >gi 3253216 gb AAC24346.1 | 588 | RATTELRTYSLLRN  | KAIDFL  | -32.856 |
| >gi 3253216 gb AAC24346.1 | 597 | SLLNRKAIDFLLQR  | WGGTCR  | -41.036 |
| >gi 3253216 gb AAC24346.1 | 603 | AIDFLLQRWGGTCR  | ILGPSC  | -40.379 |
| >gi 3253216 gb AAC24346.1 | 650 | PDHGDDLNLWTGWR  | QWIPAG  | -41.932 |
| >gi 288930 emb CAA51257.1 | 57  | LLSFLPSDFFPVSR  | DLLDTA  | -29.212 |
| >gi 288930 emb CAA51257.1 | 68  | SVRDLLDTASALYR  | DALESP  | -26.131 |
| >gi 288930 emb CAA51257.1 | 85  | ESPEHCSPHHTALR  | QAILCW  | -22.892 |
| >gi 288930 emb CAA51257.1 | 111 | ATWVGVNLEDPASR  | DLVVSY  | -40.311 |
| >gi 288930 emb CAA51257.1 | 127 | VVSYVNTNMGLKFR  | QLLWFH  | -32.276 |
| >gi 288930 emb CAA51257.1 | 141 | QLLWFHISCLTFGR  | ETVIEY  | -35.367 |
| >gi 288930 emb CAA51257.1 | 156 | TVIEYLVSFGVWIR  | TPPAYR  | -36.397 |
| >gi 288930 emb CAA51257.1 | 162 | VSFGVWIRTPPAYR  | PPNAPI  | -33.855 |
| >gi 288930 emb CAA51257.1 | 179 | APILSTLPETTIVR  | RRGRSP  | -35.785 |
| >gi 288930 emb CAA51257.1 | 180 | PILSTLPETTIVRR  | RGRSPR  | -14.017 |
| >gi 288930 emb CAA51257.1 | 181 | ILSTLPETTIVRRR  | GRSPRR  | -10.665 |
| >gi 288930 emb CAA51257.1 | 186 | PETTIVRRRGRSPR  | RRTSPS  | 7.612   |
| >gi 288930 emb CAA51257.1 | 187 | ETTVVRRRGRSPRR  | RTPSPR  | -11.322 |
| >gi 288930 emb CAA51257.1 | 188 | TTVVRRRGRSPRRR  | TPSPRR  | -13.685 |
| >gi 288930 emb CAA51257.1 | 193 | RRGRSPRRRTPSPR  | RRRSQS  | -20.815 |
| >gi 288930 emb CAA51257.1 | 194 | RGRSPRRRTPSPRR  | RRSQSP  | -20.14  |
| >gi 288930 emb CAA51257.1 | 195 | GRSPRRRTPSPRRR  | RSQSPR  | -11.814 |
| >gi 288930 emb CAA51257.1 | 201 | RTPSPRRRRSQSPR  | RRRSQS  | -16.025 |
| >gi 288930 emb CAA51257.1 | 202 | TPSPRRRRSQSPRR  | RRSQSR  | -20.838 |
| >gi 288930 emb CAA51257.1 | 203 | PSPRRRRSQSPRRR  | RSQSRE  | -14.003 |
| >gi 288930 emb CAA51257.1 | 204 | SPRRRRSQSPRRRR  | SQSRES  | 16.661  |
| >gi 288930 emb CAA51257.1 | 208 | RRSQSPRRRRSQSR  | ESQC--  | -10.989 |
| >gi 1346266 sp P16060.2 H | 64  | KEHNGKLCSLKGVR  | PLILKD  | -10.806 |
| >gi 1346266 sp P16060.2 H | 131 | KHLMSSTNHIEKIR  | IIPRNS  | -35.784 |
| >gi 1346266 sp P16060.2 H | 135 | SSTNHIEKIRIIPR  | NSWSEH  | -1.522  |
| >gi 1346266 sp P16060.2 H | 156 | ASSGVSSSCPYNRR  | SSFYRN  | -31.491 |
| >gi 1346266 sp P16060.2 H | 161 | SSSCPYNRRSSFYR  | NVVWLI  | -24.54  |
| >gi 1346266 sp P16060.2 H | 178 | WLIKKNNSYPTIKR  | TYNNTN  | -29.48  |
| >gi 1346266 sp P16060.2 H | 205 | WGIHHPADAAEQTR  | LYKNSN  | -41.426 |

|                           |     |                 |        |         |
|---------------------------|-----|-----------------|--------|---------|
| >gi 1346266 sp P16060.2 H | 224 | NTYVSVGTSTLNQR  | SIPEIA | -24.145 |
| >gi 1346266 sp P16060.2 H | 232 | STLNQRSIPEIATR  | PKVNGQ | -27.83  |
| >gi 1346266 sp P16060.2 H | 241 | EIATRPKVNGQNGR  | IEFFWT | -38.55  |
| >gi 1346266 sp P16060.2 H | 250 | GQNGRIEFFWTILR  | PNHAIS | -39.902 |
| >gi 1346266 sp P16060.2 H | 282 | AYKIVKKGDSAIMR  | SELEYG | -38.604 |
| >gi 1346266 sp P16060.2 H | 334 | YVKS NKLVLATGPR | NVPQRR | -24.256 |
| >gi 1346266 sp P16060.2 H | 339 | KLVLATGPRNVPQR  | RKKRGL | -7.743  |
| >gi 1346266 sp P16060.2 H | 340 | LVLATGPRNVPQRR  | KKRGLF | -22.954 |
| >gi 1346266 sp P16060.2 H | 418 | QFEAVGKEFNLER   | RIENLN | -40.345 |
| >gi 1346266 sp P16060.2 H | 419 | FEAVGKEFNLER    | IENLNK | -31.907 |
| >gi 1346266 sp P16060.2 H | 449 | TYNAELVLMENER   | TLDFHD | -45.173 |
| >gi 1346266 sp P16060.2 H | 466 | FHDSNVKNLYDKVR  | LQLRDN | -40.721 |
| >gi 1346266 sp P16060.2 H | 470 | NVKNLYDKVRLQLR  | DNAKEL | -3.602  |
| >gi 1346266 sp P16060.2 H | 496 | FYHKCDNECMESVR  | NGTYDY | -40.611 |
| >gi 1346266 sp P16060.2 H | 510 | NGTYDYPQYSEESR  | LNREEI | -40.145 |
| >gi 1346266 sp P16060.2 H | 513 | YDYPQYSEESRLNR  | EEIDGV | -11.122 |
| >gi 1346266 sp P16060.2 H | 562 | LSFWMCSNGSLQCR  | ICI--- | -38.621 |
| >gi 122933 sp P11135 HEMA | 69  | KLCSLNGVKPLILR  | DCSVAG | -12.969 |
| >gi 122933 sp P11135 HEMA | 131 | KHLLSCTKHFEKIR  | IIPRDS | -37.715 |
| >gi 122933 sp P11135 HEMA | 135 | SCTKHFEKIRIIPR  | DSWPNH | 0.295   |
| >gi 122933 sp P11135 HEMA | 156 | ASLGVSSACPYNGR  | SSFFRN | -31.83  |
| >gi 122933 sp P11135 HEMA | 161 | SSACPYNGRSSFFR  | NVVWLI | -24.79  |
| >gi 122933 sp P11135 HEMA | 178 | WLIKKNAYPTIKR   | SYSNTN | -21.627 |
| >gi 122933 sp P11135 HEMA | 224 | TTYVSVGTSTLNQR  | SIPKIA | -24.112 |
| >gi 122933 sp P11135 HEMA | 232 | STLNQRSIPKIATR  | PKLNGQ | -8.031  |
| >gi 122933 sp P11135 HEMA | 241 | KIATRPKLNGQSGR  | MEFFWT | -31.76  |
| >gi 122933 sp P11135 HEMA | 326 | LTIGECPKYVKSDR  | LVLATG | -30.968 |
| >gi 122933 sp P11135 HEMA | 334 | YVKSDRLVLATGLR  | NTPQRK | -26.104 |
| >gi 122933 sp P11135 HEMA | 339 | RLVLATGLRNTPQR  | KRKKRG | -28.723 |
| >gi 122933 sp P11135 HEMA | 341 | VLATGLRNTPQRKR  | KKRGLF | -18.459 |
| >gi 122933 sp P11135 HEMA | 419 | QFEAVGKEFNLER   | RIENLN | -40.345 |
| >gi 122933 sp P11135 HEMA | 420 | FEAVGKEFNLER    | IENLNK | -31.907 |
| >gi 122933 sp P11135 HEMA | 450 | TYNAELVLMENER   | TLDFHD | -45.173 |
| >gi 122933 sp P11135 HEMA | 467 | FHDANVKS LYDKVR | LQLKDN | -40.721 |
| >gi 122933 sp P11135 HEMA | 475 | LYDKVRLQLKDNR   | ELGNGC | -20.166 |
| >gi 122933 sp P11135 HEMA | 497 | FYHKCDNECMESIR  | NGTYNY | -41.497 |
| >gi 122933 sp P11135 HEMA | 511 | NGTYNYPQYSEEAR  | LNREEI | -38.338 |
| >gi 122933 sp P11135 HEMA | 514 | YNYPQYSEEARLNR  | EEISGI | -12.152 |
| >gi 122933 sp P11135 HEMA | 563 | LSFWMCSNGSLQCR  | ICI--- | -38.621 |
| >gi 28849361 gb AAO52863. | 58  | KLCDLDGVKPLILR  | DCSVAG | -12.871 |
| >gi 28849361 gb AAO52863. | 112 | DFNDYEELKHLLSR  | INHFEK | -26.471 |
| >gi 28849361 gb AAO52863. | 150 | SSACPYLGKSSFFR  | NVVWLI | -26.581 |
| >gi 28849361 gb AAO52863. | 167 | WLIKKNAYPTIKR   | SYNNTN | -21.606 |

|                           |     |                  |        |         |
|---------------------------|-----|------------------|--------|---------|
| >gi 28849361 gb AAO52863. | 213 | TTYISVGTSTLNQR   | LVPKIA | -32.261 |
| >gi 28849361 gb AAO52863. | 221 | STLNQRLVPKIATR   | SKVNGQ | -1.836  |
| >gi 28849361 gb AAO52863. | 230 | KIATRSKVNGQSGR   | MEFFWT | -31.76  |
| >gi 28849361 gb AAO52863. | 315 | LTIGECPKYVKSNR   | LVLATG | -24.563 |
| >gi 28849361 gb AAO52863. | 323 | YVKS NRLVLATGLR  | NTPQRE | -26.682 |
| >gi 28849361 gb AAO52863. | 328 | RLVLATGLRNTPQR   | ERRRKK | -22.968 |
| >gi 28849361 gb AAO52863. | 330 | VLATGLRNTPQRER   | RRKKRG | -32.867 |
| >gi 28849361 gb AAO52863. | 331 | LATGLRNTPQRERR   | RKKRGL | 7.958   |
| >gi 28849361 gb AAO52863. | 332 | ATGLRNTPQRERRR   | KKRGLF | -18.83  |
| >gi 28849361 gb AAO52863. | 403 | IIDKMNTQFEAVGR   | EFNNLE | -35.83  |
| >gi 28849361 gb AAO52863. | 410 | QFEAVGREFNNLER   | RIENLN | -39.647 |
| >gi 28849361 gb AAO52863. | 411 | FEAVGREFNNLERR   | IENLNK | -30.932 |
| >gi 28849361 gb AAO52863. | 441 | TYNAELLVLMENER   | TLDFHD | -45.173 |
| >gi 28849361 gb AAO52863. | 458 | FHDSNVKNLYDKVR   | LQLRDN | -40.721 |
| >gi 28849361 gb AAO52863. | 462 | NVKNLYDKVRLQLR   | DNAKEL | -3.602  |
| >gi 28849361 gb AAO52863. | 499 | SVKNGTYDYPQYLR   | KAGLNR | -30.863 |
| >gi 28849361 gb AAO52863. | 505 | YDYPQYLRKAGLNR   | EEISGV | -26.768 |
| >gi 28849361 gb AAO52863. | 554 | LSLWMCSNGSLQCR   | ICI--- | -38.599 |
| >gi 324096 gb AAA43150.1  | 40  | AVSNGTKVNTLTER   | GVEVVN | -32.513 |
| >gi 324096 gb AAA43150.1  | 53  | RGVEVVNATETVER   | TNIPKI | -48.109 |
| >gi 324096 gb AAA43150.1  | 65  | ERTNIPKICKSGKR   | TTDLGQ | -21.052 |
| >gi 324096 gb AAA43150.1  | 98  | DQFLEFSADLIER    | REGNDV | -41.131 |
| >gi 324096 gb AAA43150.1  | 99  | QFLEFSADLIERR    | EGNDVC | -12.05  |
| >gi 324096 gb AAA43150.1  | 117 | VCYPGKVFVNEEALR  | QILRGS | -39.423 |
| >gi 324096 gb AAA43150.1  | 121 | GKVFVNEEALRQILR  | GSGGID | -12.915 |
| >gi 324096 gb AAA43150.1  | 139 | IDKETMGFTYSGIR   | TNGTTS | -36.058 |
| >gi 324096 gb AAA43150.1  | 148 | YSGIRNNGTTSACR   | RSGSSF | -33.325 |
| >gi 324096 gb AAA43150.1  | 149 | SGIRNNGTTSACRR   | SGSSFY | -19.072 |
| >gi 324096 gb AAA43150.1  | 181 | ASFPQMTKSYKNTR   | RESALI | -30.835 |
| >gi 324096 gb AAA43150.1  | 182 | SFPQMTKSYKNTRR   | ESALIV | -12.538 |
| >gi 324096 gb AAA43150.1  | 229 | SKYHQSFVPSPGTR   | PQINGQ | -29.287 |
| >gi 324096 gb AAA43150.1  | 238 | SPGTRPQINGQSGR   | IDFHWL | -31.514 |
| >gi 324096 gb AAA43150.1  | 265 | VTFSFN GAFIAPNR  | ASFLRG | -29.441 |
| >gi 324096 gb AAA43150.1  | 270 | NGAFIAPNRASFLR   | GKSMGI | -21.049 |
| >gi 324096 gb AAA43150.1  | 300 | EGECYHSGGTITSR   | LPFQNI | -25.626 |
| >gi 324096 gb AAA43150.1  | 309 | TITSRLPFQINISR   | AVGKCP | -19.484 |
| >gi 324096 gb AAA43150.1  | 316 | FQINISR AVGK CPR | YVKQES | -20.361 |
| >gi 324096 gb AAA43150.1  | 339 | ATGMKNVPEPSKRR   | KKRGLF | -28.364 |
| >gi 324096 gb AAA43150.1  | 367 | NGWEGLVDGWYGFR   | HQNAQG | -39.83  |
| >gi 324096 gb AAA43150.1  | 396 | TQSAIDQITGKLN R  | LIEKTN | -23.244 |
| >gi 324096 gb AAA43150.1  | 459 | NQHTIDLADSEMNR   | LYERVR | -51.058 |
| >gi 324096 gb AAA43150.1  | 463 | IDLADSEMNRLYER   | VRKQLR | -34.598 |
| >gi 324096 gb AAA43150.1  | 465 | LADSEMNRLYERVR   | KQLREN | -37.898 |



|                           |     |                |        |         |
|---------------------------|-----|----------------|--------|---------|
| >gi 324096 gb AAA43150.1  | 469 | EMNRLYERVRKQLR | ENAEED | 3.944   |
| >gi 324096 gb AAA43150.1  | 495 | IFHKDDDCMASIR  | NNTYDH | -36.558 |
| >gi 324096 gb AAA43150.1  | 505 | ASIRNNTYDHSKYR | EEAMQN | -37.425 |
| >gi 324096 gb AAA43150.1  | 512 | YDHSKYREEAMQNR | IQIDPV | -41.338 |
| >gi 324096 gb AAA43150.1  | 558 | MGLVFICVKNGNMR | CTICI- | -28.748 |
| >gi 1491997 gb AAC55182.1 | 34  | LVIVLVALLFLYSR | ACELEI | -33.52  |
| >gi 1491997 gb AAC55182.1 | 86  | SFPEQLDSSLSEGR | THKHKF | -36.919 |
| >gi 1491997 gb AAC55182.1 | 130 | FSCVLVDPEQVVQR | HLALTP | -28.745 |
| >gi 1491997 gb AAC55182.1 | 146 | ALTPPGTTPPTATR | TPPENA | -32.261 |
| >gi 1491997 gb AAC55182.1 | 158 | TRTPPENADAAGAR | RRRRGA | -35.441 |
| >gi 1491997 gb AAC55182.1 | 159 | RTPPENADAAGARR | RRRGAP | -20.172 |
| >gi 1491997 gb AAC55182.1 | 160 | TPPENADAAGARRR | RRGAPT | -18.408 |
| >gi 1491997 gb AAC55182.1 | 161 | PPENADAAGARRRR | RGAPTS | 10.817  |
| >gi 1491997 gb AAC55182.1 | 212 | GNKKNKKKGKGGKR | RGNKTK | -12.769 |
| >gi 1491997 gb AAC55182.1 | 213 | NKKNKKKGKGGKRR | GNKTKH | 11.008  |
| >gi 1491997 gb AAC55182.1 | 225 | RRGNKTKHKNDKKR | GGIPKN | -14.279 |
| >gi 1491997 gb AAC55182.1 | 232 | HKNDKKRGGIPKNR | HVR--- | -22.921 |
| >gi 138680 sp P26540.1 VL | 61  | AGVFFGGLGISTGR | GTGGAT | -24.762 |
| >gi 138680 sp P26540.1 VL | 79  | ATGYVPLGEGPGVR | VGGTPT | -39.635 |
| >gi 138680 sp P26540.1 VL | 88  | GPGVRVGGTPTVVR | PSLVPE | -28.625 |
| >gi 138680 sp P26540.1 VL | 174 | AVLEVAPEPIPTR  | VRVSRT | -33.255 |
| >gi 138680 sp P26540.1 VL | 176 | LEVAPEPIPTRVR  | VSRTHY | -29.851 |
| >gi 138680 sp P26540.1 VL | 179 | APEPIPTRVRVSR  | THYHNP | -3.672  |
| >gi 138680 sp P26540.1 VL | 233 | DITDIIIEEIPSR  | YTFEIE | -34.942 |
| >gi 138680 sp P26540.1 VL | 245 | SRYTFEIEEPTPPR | RSSTPL | -32.125 |
| >gi 138680 sp P26540.1 VL | 246 | RYTFEIEEPTPPRR | SSTPLP | -11.737 |
| >gi 138680 sp P26540.1 VL | 253 | EPTPPRRSSTPLPR | NQSVGR | -24.289 |
| >gi 138680 sp P26540.1 VL | 259 | RSSTPLPRNQSVGR | RRGFSL | -33.972 |
| >gi 138680 sp P26540.1 VL | 260 | SSTPLPRNQSVGRR | RGFSLT | -15.2   |
| >gi 138680 sp P26540.1 VL | 261 | STPLPRNQSVGRRR | GFSLTN | -15.052 |
| >gi 138680 sp P26540.1 VL | 268 | QSVGRRRGFSLTNR | RLVQQV | -28.811 |
| >gi 138680 sp P26540.1 VL | 269 | SVGRRRGFSLTNR  | LVQQVQ | -20.912 |
| >gi 138680 sp P26540.1 VL | 290 | DNPLFLTQPSKLVR | FAFDNP | -3.104  |
| >gi 138680 sp P26540.1 VL | 319 | FENDLDVFEPPDR  | DFLDVR | -50.922 |
| >gi 138680 sp P26540.1 VL | 325 | VFEPPDRDFLDVR  | ELRRPQ | -38.531 |
| >gi 138680 sp P26540.1 VL | 328 | EPPDRDFLDVREL  | RPQYST | -18.088 |
| >gi 138680 sp P26540.1 VL | 329 | PPDRDFLDVRELRR | PQYSTT | -17.154 |
| >gi 138680 sp P26540.1 VL | 341 | RRPQYSTTPAGYVR | VSRLGT | -32.342 |
| >gi 138680 sp P26540.1 VL | 344 | QYSTTPAGYVRVSR | LGTRAT | -20.01  |
| >gi 138680 sp P26540.1 VL | 348 | TPAGYVRVSRGTR  | ATIRTR | -7.604  |
| >gi 138680 sp P26540.1 VL | 352 | YVRVSRGTRATIR  | TRSGAQ | -26.08  |
| >gi 138680 sp P26540.1 VL | 354 | RVSRLGTRATIRTR | SGAQIG | -17.231 |
| >gi 138680 sp P26540.1 VL | 367 | RSGAQIGSQVHFYR | DLSSIN | -24.125 |

|                           |     |                 |        |         |
|---------------------------|-----|-----------------|--------|---------|
| >gi 138680 sp P26540.1 VL | 441 | VEDFSGSQLVIGNR  | RSTNSY | -22.734 |
| >gi 138680 sp P26540.1 VL | 442 | EDFSGSQLVIGNRR  | STNSYT | -13.827 |
| >gi 138680 sp P26540.1 VL | 451 | IGNRRSTNSYTVPR  | FETTRN | -33.635 |
| >gi 138680 sp P26540.1 VL | 456 | STNSYTVPRFETTR  | NGSYYT | -25.394 |
| >gi 138680 sp P26540.1 VL | 476 | QDTKGYVAYPESR   | NNAEII | -36.285 |
| >gi 138680 sp P26540.1 VL | 509 | HDNTGDFYLHPSLR  | RRKRKR | -26.121 |
| >gi 138680 sp P26540.1 VL | 510 | DNTGDFYLHPSLRR  | RKRKRK | -17.367 |
| >gi 138680 sp P26540.1 VL | 511 | NTGDFYLHPSLRRR  | KRKRKY | -19.436 |
| >gi 138680 sp P26540.1 VL | 513 | GDFYLHPSLRRRKR  | KRKYL- | -7.235  |
| >gi 138680 sp P26540.1 VL | 515 | FYLHPSLRRRKRKR  | KYL--- | -14.122 |
| >gi 459921 gb AAA46955.1  | 47  | PKIEHTTIADQILR  | YGSMGV | -32.653 |
| >gi 459921 gb AAA46955.1  | 69  | GGLGIGSGSGTGGR  | TGYVPL | -36.615 |
| >gi 459921 gb AAA46955.1  | 78  | GTGGRTGYVPLSTR  | PSTVSE | -26.126 |
| >gi 459921 gb AAA46955.1  | 90  | TRPSTVSEASIPR   | PPVSID | -25.61  |
| >gi 459921 gb AAA46955.1  | 215 | NENITSSTPIPGVR  | RPARLG | -28.303 |
| >gi 459921 gb AAA46955.1  | 216 | ENITSSTPIPGVRR  | PARLGL | -23.46  |
| >gi 459921 gb AAA46955.1  | 219 | TSSTPIPGVRRPAR  | LGLYSK | -14.853 |
| >gi 459921 gb AAA46955.1  | 284 | APDPDFLDIIALHR  | PALTSR | -31.843 |
| >gi 459921 gb AAA46955.1  | 290 | LDIIALHRPALTSR  | RNTVRY | -25.161 |
| >gi 459921 gb AAA46955.1  | 291 | DIIALHRPALTSRR  | NTVRYS | -13.86  |
| >gi 459921 gb AAA46955.1  | 295 | LHRPALTSRRNTVSR | YSRLGN | -14.381 |
| >gi 459921 gb AAA46955.1  | 298 | PALTSRRNTVRYSR  | LGNKQT | -19.069 |
| >gi 459921 gb AAA46955.1  | 306 | TVRYSRLGNKQTLR  | TRSGAT | -25.44  |
| >gi 459921 gb AAA46955.1  | 308 | RYSRLGNKQTLRTR  | SGATIG | -25.553 |
| >gi 459921 gb AAA46955.1  | 316 | QTLRTRSGATIGAR  | VHYYD  | -32.039 |
| >gi 459921 gb AAA46955.1  | 450 | GDFYLHPSYMLKR   | RRKRVS | -27.777 |
| >gi 459921 gb AAA46955.1  | 451 | DFYLHPSYMLKRR   | RKRVS  | -20.974 |
| >gi 459921 gb AAA46955.1  | 452 | FYLHPSYMLKRRR   | KRVSYF | -17.482 |
| >gi 459921 gb AAA46955.1  | 454 | LHPSYMLKRRRKR   | VSFFFT | -3.891  |
| >gi 56463030 gb AAV91690. | 69  | GGLGIGTGSSTGGR  | TGYIPL | -36.719 |
| >gi 56463030 gb AAV91690. | 78  | GTGGRTGYIPLGTR  | PPTATD | -35.522 |
| >gi 56463030 gb AAV91690. | 90  | TRPPTATDTLAPVR  | PPLTVD | -30.357 |
| >gi 56463030 gb AAV91690. | 220 | PNTVTSSTPIPGSR  | PVARLG | -26.986 |
| >gi 56463030 gb AAV91690. | 224 | TSSTPIPGSRPVAR  | LGLYSR | -24.49  |
| >gi 56463030 gb AAV91690. | 230 | PGSRPVARLGLYSR  | TTQQVK | -32.591 |
| >gi 56463030 gb AAV91690. | 291 | APDPDFLDIVALHR  | PALTSR | -31.909 |
| >gi 56463030 gb AAV91690. | 297 | LDIVALHRPALTSR  | RTGIRY | -23.035 |
| >gi 56463030 gb AAV91690. | 298 | DIVALHRPALTSRR  | TGIRYS | -21.846 |
| >gi 56463030 gb AAV91690. | 302 | LHRPALTSRRTGIR  | YSRIGN | -20.741 |
| >gi 56463030 gb AAV91690. | 305 | PALTSRRTGIRYSR  | IGNKQT | -19.225 |
| >gi 56463030 gb AAV91690. | 313 | GIRYSRIGNKQTLR  | TRSGKS | -25.358 |
| >gi 56463030 gb AAV91690. | 315 | RYSRIGNKQTLRTR  | SGKSIG | -24.887 |
| >gi 56463030 gb AAV91690. | 456 | AGDFYLHPSYMLR   | KRRKRL | -36.376 |

|                           |     |                 |        |         |
|---------------------------|-----|-----------------|--------|---------|
| >gi 56463030 gb AAV91690. | 458 | DFYLHPSYYMLRKR  | RKRLPY | -21.99  |
| >gi 56463030 gb AAV91690. | 459 | FYLHPSYYMLRKRR  | KRLPYF | -15.186 |
| >gi 56463030 gb AAV91690. | 461 | LHPSYYMLRKRKR   | LPYFFS | -6.16   |
| >gi 6002621 gb AAF00067.1 | 68  | GGLGIGTGS GTGGR | TGYVPL | -36.649 |
| >gi 6002621 gb AAF00067.1 | 89  | TSAKPSITSGPMAR  | PPVVVE | -27.525 |
| >gi 6002621 gb AAF00067.1 | 156 | DVSVTSHTTTSIFR  | NPVFTE | -33.004 |
| >gi 6002621 gb AAF00067.1 | 219 | GPTSSTPVPGTAPR  | PRVGLY | -30.62  |
| >gi 6002621 gb AAF00067.1 | 221 | TSSTPVPGTAPRPR  | VGLYSR | -29.895 |
| >gi 6002621 gb AAF00067.1 | 227 | PGTAPRPRVGLYSR  | ALHQVQ | -25.338 |
| >gi 6002621 gb AAF00067.1 | 245 | VQVTDPAFLSTPQR  | LITYDN | -31.904 |
| >gi 6002621 gb AAF00067.1 | 281 | IHNAPDEAFMDIIR  | LHRPAI | -46.169 |
| >gi 6002621 gb AAF00067.1 | 284 | APDEAFMDIIRLHR  | PAIASR | -2.719  |
| >gi 6002621 gb AAF00067.1 | 290 | MDIIRLHRPAIASR  | RGLVRY | -22.35  |
| >gi 6002621 gb AAF00067.1 | 291 | DIIRLHRPAIASRR  | GLVRYS | -11.502 |
| >gi 6002621 gb AAF00067.1 | 295 | LHRPAIASRRGLVR  | YSRIGQ | -15.49  |
| >gi 6002621 gb AAF00067.1 | 298 | PAIASRRGLVRYSR  | IGQRGS | -20.131 |
| >gi 6002621 gb AAF00067.1 | 302 | SRRGLVRYSRIGQR  | GSMHTR | -0.853  |
| >gi 6002621 gb AAF00067.1 | 308 | RYSRIGQRGSMHTR  | SGKHIG | -22.848 |
| >gi 6002621 gb AAF00067.1 | 316 | GSMHTRSGKHIGAR  | IHYFYD | -25.899 |
| >gi 6002621 gb AAF00067.1 | 444 | GSGFYLHPAWYFAR  | KRRKRI | -35.029 |
| >gi 6002621 gb AAF00067.1 | 446 | GFYLHPAWYFARKR  | RKRIPL | -23.009 |
| >gi 6002621 gb AAF00067.1 | 447 | FYLHPAWYFARKRR  | KRIPLF | -15.015 |
| >gi 6002621 gb AAF00067.1 | 449 | LHPAWYFARKRRKR  | IPLFFS | -6.937  |
| >gi 6010224 emb CAB57284. | 64  | YLGGLGIGTWSTGR  | VAAGGS | -37.022 |
| >gi 6010224 emb CAB57284. | 72  | TWSTGRVAAGGSPR  | YTPLRT | -22.395 |
| >gi 6010224 emb CAB57284. | 77  | RVAAGGSPRYTPLR  | TAGSTS | -29.252 |
| >gi 6010224 emb CAB57284. | 91  | TAGSTSSLASIGSR  | AVTAGT | -16.9   |
| >gi 6010224 emb CAB57284. | 98  | LASIGRAVTAGTR   | PSIGAG | -31.153 |
| >gi 6010224 emb CAB57284. | 117 | GIPLDTLETLGALR  | PGVYED | -31.359 |
| >gi 6010224 emb CAB57284. | 180 | PEDIAVLELQPLDR  | PTWQVS | -38.294 |
| >gi 6010224 emb CAB57284. | 238 | GGENIELTYFGSPR  | TSTPRS | -31.916 |
| >gi 6010224 emb CAB57284. | 243 | ELTYFGSPRTSTPR  | SIASKS | -14.327 |
| >gi 6010224 emb CAB57284. | 250 | PRTSTPRSIASKSR  | GILNWF | -29.78  |
| >gi 6010224 emb CAB57284. | 259 | ASKSRGILNWFSKR  | YYTQVP | -31.287 |
| >gi 6010224 emb CAB57284. | 295 | YEAEPAVLKGPSGR  | VGLSQV | -28.929 |
| >gi 6010224 emb CAB57284. | 310 | GLSQVYKPDTLTTR  | SGTEVG | -30.817 |
| >gi 6010224 emb CAB57284. | 322 | TRSGTEVGPQLHVR  | YSLSTI | -28.214 |
| >gi 6010224 emb CAB57284. | 371 | FEEIELDDFSETHR  | LLPQNT | -33.775 |
| >gi 6010224 emb CAB57284. | 387 | PQNTSSTPVGSGVR  | RSLIPT | -30.422 |
| >gi 6010224 emb CAB57284. | 388 | QNTSSTPVGSGVRR  | SLIPTQ | -10.324 |
| >gi 6010224 emb CAB57284. | 400 | RRSLIPTQEFSTR   | PTGVVT | -38.513 |
| >gi 6010224 emb CAB57284. | 461 | LYSSNYTLHPSLLR  | KRKKRK | -30.317 |
| >gi 6010224 emb CAB57284. | 463 | SSNYTLHPSLLRKR  | KKRKHA | -21.965 |

|                           |     |                 |        |         |
|---------------------------|-----|-----------------|--------|---------|
| >gi 6010224 emb CAB57284. | 466 | YTLHPSLLRKRKKR  | KHA--- | -9.917  |
| >gi 8919574 emb CAB96120. | 66  | GGLGISSAGGSGGR  | LGYTPL | -37.057 |
| >gi 8919574 emb CAB96120. | 86  | SGGGGSVIAAAPVR  | PPITTE | -30.597 |
| >gi 8919574 emb CAB96120. | 160 | ISDVTSDTSGTVSR  | THINNP | -36.865 |
| >gi 8919574 emb CAB96120. | 172 | SRTHINNPFAFEAPR | SGDQDV | -28.52  |
| >gi 8919574 emb CAB96120. | 210 | ENTGGELIEMVPLR  | HPPRSE | -30.703 |
| >gi 8919574 emb CAB96120. | 214 | GELIEMVPLRHPPR  | SEGDFR | -1.089  |
| >gi 8919574 emb CAB96120. | 220 | VPLRHPPRSEGDFR  | ETSFST | -38.7   |
| >gi 8919574 emb CAB96120. | 233 | RETSFSTSTPNPDR  | SALRSI | -31.61  |
| >gi 8919574 emb CAB96120. | 237 | FSTSTPNPDRSALR  | SINLAS | -21.378 |
| >gi 8919574 emb CAB96120. | 244 | PDRSALRSINLASR  | RYQQVQ | -34.76  |
| >gi 8919574 emb CAB96120. | 245 | DRSALRSINLASRR  | YQQVQV | -19.084 |
| >gi 8919574 emb CAB96120. | 259 | YQQVQVENPAFLNR  | PRELVQ | -30.56  |
| >gi 8919574 emb CAB96120. | 261 | QVQVENPAFLNRPR  | ELVQFE | -25.101 |
| >gi 8919574 emb CAB96120. | 305 | VVAAPDPAFQDVVVR | LSRPSF | -41.892 |
| >gi 8919574 emb CAB96120. | 308 | APDPAFQDVVRLSR  | PSFTQS | -2.859  |
| >gi 8919574 emb CAB96120. | 315 | DVVRLSRPSFTQSR  | AGRVRV | -26.255 |
| >gi 8919574 emb CAB96120. | 318 | RLSRPSFTQSRAGR  | VRVSRL | -21.69  |
| >gi 8919574 emb CAB96120. | 320 | SRPSFTQSRAGRVR  | VSRLGR | -23.34  |
| >gi 8919574 emb CAB96120. | 323 | SFTQSRAGRVRVSR  | LGRTL  | -13.273 |
| >gi 8919574 emb CAB96120. | 326 | QSRAGRVRVSR     | TLTMQT | 0.559   |
| >gi 8919574 emb CAB96120. | 333 | RVSRLGRTLTMQTR  | SAKAFG | -21.304 |
| >gi 8919574 emb CAB96120. | 408 | TSADENLTLVFSR   | GRGQGS | -35.961 |
| >gi 8919574 emb CAB96120. | 410 | ADENLTLVFSRGR   | GQGSYV | -33.673 |
| >gi 8919574 emb CAB96120. | 441 | INIGDSKYTLNPR   | ETVSFE | -25.896 |
| >gi 8919574 emb CAB96120. | 472 | GNADGTYYLEEPLR  | KKRRKS | -39.863 |
| >gi 8919574 emb CAB96120. | 475 | DGTYYLEEPLRKKR  | RKSIFL | 10.959  |
| >gi 8919574 emb CAB96120. | 476 | GTYYLEEPLRKKRR  | KSIFLL | -9.581  |
| >gi 9626076 ref NP_040316 | 68  | GGLGIGTGSSTGGR  | TGYIPL | -36.719 |
| >gi 9626076 ref NP_040316 | 77  | GTGGRTGYIPLGGR  | SNTVVD | -32.282 |
| >gi 9626076 ref NP_040316 | 88  | GGRSNTVVDVGPTR  | PPVVIE | -36.606 |
| >gi 9626076 ref NP_040316 | 119 | LIEDSSVVTSGAPR  | PTFTGT | -26.349 |
| >gi 9626076 ref NP_040316 | 219 | GEEPISTPLPTVR   | RVAGPR | -24.072 |
| >gi 9626076 ref NP_040316 | 220 | EEPISTPLPTVRR   | VAGPRL | -20.305 |
| >gi 9626076 ref NP_040316 | 225 | STPLPTVRRVAGPR  | LYSRAY | -30.612 |
| >gi 9626076 ref NP_040316 | 229 | PTVRRVAGPRLYSR  | AYQQVS | -14.646 |
| >gi 9626076 ref NP_040316 | 244 | YQQVSVANPEFLTR  | PSSLIT | -31.994 |
| >gi 9626076 ref NP_040316 | 268 | AFEPVDTTLTFDPR  | SDVPDS | -29.979 |
| >gi 9626076 ref NP_040316 | 281 | RSDVPDSDFMDIIR  | LHRPAL | -45.165 |
| >gi 9626076 ref NP_040316 | 284 | VPDSDFMDIIRLHR  | PALTSR | -2.539  |
| >gi 9626076 ref NP_040316 | 290 | MDIIRLHRPALTSR  | RGTVRF | -25.448 |
| >gi 9626076 ref NP_040316 | 291 | DIIRLHRPALTSRR  | GTVRFS | -12.564 |
| >gi 9626076 ref NP_040316 | 295 | LHRPALTSRRGTVR  | FSRLGQ | -11.895 |

|                           |     |                 |        |         |
|---------------------------|-----|-----------------|--------|---------|
| >gi 9626076 ref NP_040316 | 298 | PALTSRRGTVRFSR  | LGQRAT | -18.265 |
| >gi 9626076 ref NP_040316 | 302 | SRRGTVRFSRLGQR  | ATMFTR | -6.472  |
| >gi 9626076 ref NP_040316 | 308 | RFSRLGQRATMFTR  | SGTQIG | -25.524 |
| >gi 9626076 ref NP_040316 | 316 | ATMFTRSGTQIGAR  | VHFYHD | -32.94  |
| >gi 9626076 ref NP_040316 | 364 | YADDMDPAVPVPSR  | STTSFA | -18.256 |
| >gi 9626076 ref NP_040316 | 448 | YYLWPLYFIPKKR   | KRVPYF | -27.356 |
| >gi 9626076 ref NP_040316 | 450 | LWPLYFIPKKRKR   | VPYFFA | -12.426 |
| >gi 975238 gb AAA86870.1  | 27  | PPRRVSKETATKTR  | QPRVQM | -23.693 |
| >gi 975238 gb AAA86870.1  | 30  | RVSKETATKTRQPR  | VQMPNG | -13.309 |
| >gi 975238 gb AAA86870.1  | 41  | QPRVQMPNGLVLMR  | MMGILW | -35.514 |
| >gi 975238 gb AAA86870.1  | 55  | MMGILWHAVAGTAR  | NPVLKA | -25.617 |
| >gi 975238 gb AAA86870.1  | 76  | WNSVPLKQATAALR  | KIKRTV | -32.814 |
| >gi 975238 gb AAA86870.1  | 80  | PLKQATAALRKIKR  | TVSALM | 6.228   |
| >gi 975238 gb AAA86870.1  | 92  | KRTVSALMVGLQKR  | GKRRSA | -16.578 |
| >gi 975238 gb AAA86870.1  | 95  | VSALMVGLQKRQKR  | RSATDW | 9.967   |
| >gi 975238 gb AAA86870.1  | 96  | SALMVGLQKRQKR   | SATDWM | -3.467  |
| >gi 975238 gb AAA86870.1  | 120 | VITLLGMTLAATVR  | KERDGS | -35.331 |
| >gi 975238 gb AAA86870.1  | 123 | LLGMTLAATVRKER  | DGSTVI | -7.167  |
| >gi 975238 gb AAA86870.1  | 130 | ATVRKERDGSTVIR  | AEGKDA | -31.701 |
| >gi 975238 gb AAA86870.1  | 141 | VIRAEGKDAATQVR  | VENGTC | -36.09  |
| >gi 975238 gb AAA86870.1  | 183 | DQGEPEVDVDCFCR  | NVDGVY | -40.777 |
| >gi 975238 gb AAA86870.1  | 194 | FCRNVDGVVLEYGR  | CGKQEG | -37.41  |
| >gi 975238 gb AAA86870.1  | 202 | YLEYGRCGKQEGSR  | TRRSVL | -28.66  |
| >gi 975238 gb AAA86870.1  | 204 | EYGRGCGKQEGSRTR | RSVLIP | -25.996 |
| >gi 975238 gb AAA86870.1  | 220 | VLIPSHAQEGELTGR | GHKWLE | -35.22  |
| >gi 975238 gb AAA86870.1  | 231 | TGRGHKWLEGDSLRL | THLTRV | -44.571 |
| >gi 975238 gb AAA86870.1  | 236 | KWLEGDSLRLTHLTR | VEGWVV | -27.587 |
| >gi 975238 gb AAA86870.1  | 265 | VTVVWLTLESVVTR  | VAVLVV | -33.128 |
| >gi 975238 gb AAA86870.1  | 282 | LVVLLCLAPVYASR  | CTHLEN | -27.11  |
| >gi 975238 gb AAA86870.1  | 289 | APVYASRCTHLENR  | DFVTGT | -28.046 |
| >gi 975238 gb AAA86870.1  | 300 | ENRDFVTGTQGTR   | VTLVLE | -32.566 |
| >gi 975238 gb AAA86870.1  | 337 | WLDAIYQENPAKTR  | EYCLHA | -31.608 |
| >gi 975238 gb AAA86870.1  | 353 | CLHAKLSDTKVAAR  | CPTMGP | -3.783  |
| >gi 975238 gb AAA86870.1  | 374 | TLAEEHQGGTVCKR  | DQSDRG | -16.396 |
| >gi 975238 gb AAA86870.1  | 379 | HQGGTVCKRDQSDR  | GWGNHC | -31.489 |
| >gi 975238 gb AAA86870.1  | 440 | TGDYVAANETHSGR  | KTASFT | -32.91  |
| >gi 975238 gb AAA86870.1  | 467 | LTMGEYGDVSLLCR  | VASGVD | -35.569 |
| >gi 975238 gb AAA86870.1  | 497 | KTVEHLPTAWQVHR  | DWFNDL | -28.966 |
| >gi 975238 gb AAA86870.1  | 520 | WKHEGAQNWNNAER  | LVEFGA | -41.614 |
| >gi 975238 gb AAA86870.1  | 596 | TYTMCCKTKFTWKR  | APTDSG | -15.279 |
| >gi 975238 gb AAA86870.1  | 619 | VVMEVTFSGTKPCR  | IPVRAV | -30.578 |
| >gi 975238 gb AAA86870.1  | 623 | VTFSGTKPCRIPVR  | AVAHGS | -18.122 |
| >gi 975238 gb AAA86870.1  | 681 | LSHQWFQKGSSIGR  | VFQKTK | -34.311 |

|                          |      |                 |        |         |
|--------------------------|------|-----------------|--------|---------|
| >gi 975238 gb AAA86870.1 | 692  | IGRVFQKTKKGIER  | LTVIGE | -28.759 |
| >gi 975238 gb AAA86870.1 | 752  | LLGVALAWLGLNMR  | NPTMSM | -33.054 |
| >gi 975238 gb AAA86870.1 | 786  | GVGADVGCVDTER   | MELRCG | -46.198 |
| >gi 975238 gb AAA86870.1 | 790  | DVGCAVDTERMELR  | CGEGLV | -28.244 |
| >gi 975238 gb AAA86870.1 | 799  | RMELRCGEGLVVWR  | EVSEWY | -20.059 |
| >gi 975238 gb AAA86870.1 | 838  | TFEEGSCGVVPQNR  | LEMAMW | -39.163 |
| >gi 975238 gb AAA86870.1 | 845  | GVVPQNRLEMAMWR  | SSVTEL | -35.495 |
| >gi 975238 gb AAA86870.1 | 875  | LTVVVDKFDPTDYR  | GGVPGL | -45.409 |
| >gi 975238 gb AAA86870.1 | 908  | WGHSMIWSIPEAPR  | RFMVGT | -40.063 |
| >gi 975238 gb AAA86870.1 | 909  | GHSMIWSIPEAPRR  | FMVGT  | -26.504 |
| >gi 975238 gb AAA86870.1 | 924  | MVGTEGQSECPLER  | RKTGVF | -42.266 |
| >gi 975238 gb AAA86870.1 | 925  | VGTEGQSECPLERR  | KTGVFT | -26.736 |
| >gi 975238 gb AAA86870.1 | 940  | TGVFTVAEFGVGLR  | TKVFLD | -32.783 |
| >gi 975238 gb AAA86870.1 | 948  | FGVGLRKTQVFLDFR | QEPTHE | -40.045 |
| >gi 975238 gb AAA86870.1 | 979  | NGMAIHTDQSLWMR  | SMKNDT | -36.203 |
| >gi 975238 gb AAA86870.1 | 998  | TGTIVIVELLVTDLR | NCSWPA | -36.08  |
| >gi 975238 gb AAA86870.1 | 1028 | DSEFLPASLAGPR   | SWYNRI | -26.237 |
| >gi 975238 gb AAA86870.1 | 1033 | LPASLAGPRSWYNR  | IPGYSE | -29.263 |
| >gi 975238 gb AAA86870.1 | 1051 | SEQVKGPWKYTPIR  | VIREEC | -32.588 |
| >gi 975238 gb AAA86870.1 | 1054 | VKGPWKYTPIRVIR  | EECPGT | -3.386  |
| >gi 975238 gb AAA86870.1 | 1071 | PGTTVTINAKCDKR  | GASVRS | -16.758 |
| >gi 975238 gb AAA86870.1 | 1076 | TINAKCDKRGASVR  | STTESG | -14.078 |
| >gi 975238 gb AAA86870.1 | 1091 | TTESGKVIPEWCCR  | ACTMPP | -42.543 |
| >gi 975238 gb AAA86870.1 | 1101 | WCCRACMPVPTFR   | TGTDCW | -29.636 |
| >gi 975238 gb AAA86870.1 | 1113 | FRTGTDCWYAMEIR  | PVHDQG | -34.492 |
| >gi 975238 gb AAA86870.1 | 1123 | MEIRPVHDQGGGLVR | SMVVAD | -31.099 |
| >gi 975238 gb AAA86870.1 | 1154 | GIVALFVVLEYIIR  | RRPSTG | -39.029 |
| >gi 975238 gb AAA86870.1 | 1155 | IVALFVVLEYIIRR  | RPSTGT | -25.359 |
| >gi 975238 gb AAA86870.1 | 1156 | VALFVVLEYIIRRR  | PSTGTT | -12.954 |
| >gi 975238 gb AAA86870.1 | 1180 | GIVVLALLVTGMVR  | IESLVR | -41.885 |
| >gi 975238 gb AAA86870.1 | 1186 | LLVTGMVRIESLVR  | YVAVG  | -39.296 |
| >gi 975238 gb AAA86870.1 | 1216 | IVALMLLQAVFELR  | VGLLSA | -37.087 |
| >gi 975238 gb AAA86870.1 | 1226 | FELRVGLLSAFALR  | RSLTVR | -28.259 |
| >gi 975238 gb AAA86870.1 | 1227 | ELRVGLLSAFALRR  | SLTVRE | -12.616 |
| >gi 975238 gb AAA86870.1 | 1232 | LLSAFALRRSLTVR  | EMVTTY | -14.224 |
| >gi 975238 gb AAA86870.1 | 1271 | KWGDALAMGALIFR  | ACTAEG | -31.379 |
| >gi 975238 gb AAA86870.1 | 1315 | VCFLSVASACSVWR  | LLKGHR | -43.382 |
| >gi 975238 gb AAA86870.1 | 1321 | ASACSVWRLLKGHR  | EQKGLT | -3.412  |
| >gi 975238 gb AAA86870.1 | 1344 | PLAGLLGGEGSGIR  | LLAFWE | -41.586 |
| >gi 975238 gb AAA86870.1 | 1355 | GIRLLAFWELSAHR  | GRRSFS | -35.741 |
| >gi 975238 gb AAA86870.1 | 1357 | RLAFWELSAHRGR   | RSFSEP | -10.232 |
| >gi 975238 gb AAA86870.1 | 1358 | LLAFWELSAHRGRR  | SFSEPL | 11.453  |
| >gi 975238 gb AAA86870.1 | 1379 | VVGVMMLTLASGMMR | HTSQEA | -30.86  |

|                          |      |                 |        |         |
|--------------------------|------|-----------------|--------|---------|
| >gi 975238 gb AAA86870.1 | 1404 | VASLLLLMLVLGTR  | KMQLVA | -37.689 |
| >gi 975238 gb AAA86870.1 | 1432 | YPELVNEGGEVSLR  | VRQDAM | -32.473 |
| >gi 975238 gb AAA86870.1 | 1434 | ELVNEGGEVSLRVR  | QDAMGN | -27.172 |
| >gi 975238 gb AAA86870.1 | 1451 | MGNFHLTELEKEER  | MMAFWL | -42.482 |
| >gi 975238 gb AAA86870.1 | 1485 | LGVMGLWTLTEMLR  | SSRRSD | -28.221 |
| >gi 975238 gb AAA86870.1 | 1488 | MGLWTLTEMLRSSR  | RSDLVF | -4.355  |
| >gi 975238 gb AAA86870.1 | 1489 | GLWTLTEMLRSSRR  | SDLVFS | -9.627  |
| >gi 975238 gb AAA86870.1 | 1500 | SRRSDLVFSGQGGR  | ERGDRP | -25.764 |
| >gi 975238 gb AAA86870.1 | 1502 | RSDLVFSGQGGRE   | GDRPFE | -34.649 |
| >gi 975238 gb AAA86870.1 | 1505 | LVFSGQGGREGRDR  | PFEVKD | -22.814 |
| >gi 975238 gb AAA86870.1 | 1515 | RGDRPFVKGDVYR   | IFSPGL | -40     |
| >gi 975238 gb AAA86870.1 | 1546 | GSKGVLHTMWHVTR  | GAALSI | -28.086 |
| >gi 975238 gb AAA86870.1 | 1565 | IDDAVAGPYWADV   | EDVVCY | -40.387 |
| >gi 975238 gb AAA86870.1 | 1595 | KGETVQVHAFPPGR  | AHEVHQ | -32.434 |
| >gi 975238 gb AAA86870.1 | 1613 | HQCQPGELILDTR   | KLGAIP | -37.809 |
| >gi 975238 gb AAA86870.1 | 1665 | YVSSIAQGEAEKSR  | PNLPQA | -40.557 |
| >gi 975238 gb AAA86870.1 | 1697 | TVLDMHPGSGKTHR  | VLPELI | -19.564 |
| >gi 975238 gb AAA86870.1 | 1704 | GSGKTHRVLPELIR  | QCIDRR | -35.624 |
| >gi 975238 gb AAA86870.1 | 1709 | HRVLPELIRQCIDR  | RLRTL  | -30.67  |
| >gi 975238 gb AAA86870.1 | 1710 | RVLPELIRQCIDRR  | LRTLVL | -29.871 |
| >gi 975238 gb AAA86870.1 | 1712 | LPELIRQCIDRRRLR | TLVLAP | -15.623 |
| >gi 975238 gb AAA86870.1 | 1720 | IDRRLRTLVLAPTR  | VVLKEM | -32.847 |
| >gi 975238 gb AAA86870.1 | 1728 | VLAPTRVVLKEMER  | ALNGKR | -29.3   |
| >gi 975238 gb AAA86870.1 | 1734 | VVLKEMERALNGKR  | VRFHSP | -27.577 |
| >gi 975238 gb AAA86870.1 | 1736 | LKEMERALNGKRV   | FHSPAV | -11.756 |
| >gi 975238 gb AAA86870.1 | 1763 | AIVDVMCHATYVNR  | RLLPQG | -29.961 |
| >gi 975238 gb AAA86870.1 | 1764 | IVDVMCHATYVNR   | LLPQGR | -23.429 |
| >gi 975238 gb AAA86870.1 | 1770 | HATYVNRLLPQGR   | QNWEVA | -27.486 |
| >gi 975238 gb AAA86870.1 | 1792 | DEAHWTDPHSIAAR  | GHLYTL | -11.951 |
| >gi 975238 gb AAA86870.1 | 1832 | PFPESENGAITSEER | QIPDGE | -43.243 |
| >gi 975238 gb AAA86870.1 | 1840 | ITSEERQIPDGEWR  | DGFDWI | -37.886 |
| >gi 975238 gb AAA86870.1 | 1852 | WRDGFWDWITEYEGR | TAWFVP | -39.277 |
| >gi 975238 gb AAA86870.1 | 1868 | WFVPSIAKGGAIAR  | TLRQKG | -28.707 |
| >gi 975238 gb AAA86870.1 | 1871 | PSIAKGGAIARTLR  | QKGKSV | -5.97   |
| >gi 975238 gb AAA86870.1 | 1891 | ICLNSKTFEKDYSR  | VRDEKP | -36.942 |
| >gi 975238 gb AAA86870.1 | 1893 | LNSKTFEKDYSRVR  | DEKPDF | -37.809 |
| >gi 975238 gb AAA86870.1 | 1916 | TDISEMGANLDVSR  | VIDGRT | -38.334 |
| >gi 975238 gb AAA86870.1 | 1921 | MGANLDVSRVIDGR  | TNIKPE | -27.989 |
| >gi 975238 gb AAA86870.1 | 1939 | PEEVDGKVELTGTR  | RVTAS  | -35.33  |
| >gi 975238 gb AAA86870.1 | 1940 | EEVDGKVELTGTRR  | VTTASA | -20.261 |
| >gi 975238 gb AAA86870.1 | 1949 | TGTRRVTTASAAQR  | RGRVGR | -27.335 |
| >gi 975238 gb AAA86870.1 | 1950 | GTRRVTTASAAQRR  | GRVGRQ | -16.294 |
| >gi 975238 gb AAA86870.1 | 1952 | RRVTTASAAQRRGR  | VGRQDG | -18.411 |

|                          |      |                 |        |         |
|--------------------------|------|-----------------|--------|---------|
| >gi 975238 gb AAA86870.1 | 1955 | TTASAAQRRGRVGR  | QDGRTD | 7.349   |
| >gi 975238 gb AAA86870.1 | 1959 | AAQRRGRVGRQDGR  | TDEYIY | -28.439 |
| >gi 975238 gb AAA86870.1 | 1993 | KEAQILLDNITTLR  | GPVATF | -26.31  |
| >gi 975238 gb AAA86870.1 | 2015 | PEQDKMPEVAGHFR  | LTEEKR | -35.913 |
| >gi 975238 gb AAA86870.1 | 2021 | PEVAGHFRLTEEKR  | KHFRHL | -33.088 |
| >gi 975238 gb AAA86870.1 | 2025 | GHFRLTEEKRKHFR  | HLLTHC | 1.318   |
| >gi 975238 gb AAA86870.1 | 2051 | AWHVAANVSSVTDR  | SWTWEG | -26.694 |
| >gi 975238 gb AAA86870.1 | 2074 | NAVDEASGDLVTFR  | SPNGAE | -27.401 |
| >gi 975238 gb AAA86870.1 | 2081 | GDLVTFRSPNGAER  | TLRPVW | -38.433 |
| >gi 975238 gb AAA86870.1 | 2084 | VTFRSPNGAERTLR  | PVWKDA | -3.481  |
| >gi 975238 gb AAA86870.1 | 2091 | GAERTLRPVWKDAR  | MFKEGR | -31.967 |
| >gi 975238 gb AAA86870.1 | 2097 | RPVWKDARMFKEGR  | DIKEFV | -22.131 |
| >gi 975238 gb AAA86870.1 | 2109 | GRDIKEFVAYASGR  | RSFGDV | -32.079 |
| >gi 975238 gb AAA86870.1 | 2110 | RDIKEFVAYASGRR  | SFGDVL | -19.92  |
| >gi 975238 gb AAA86870.1 | 2127 | DVLTGMSGVPELLR  | HRCVSA | -34.367 |
| >gi 975238 gb AAA86870.1 | 2129 | LTGMSGVPELLRHR  | CVSALD | -29.027 |
| >gi 975238 gb AAA86870.1 | 2148 | DVFYTLMHHEEPGSR | AMRMAE | -43.991 |
| >gi 975238 gb AAA86870.1 | 2151 | YTLMHHEEPGRAMR  | MAERDA | -3.765  |
| >gi 975238 gb AAA86870.1 | 2155 | HEEPGRAMRMAER   | DAPEAF | -26.62  |
| >gi 975238 gb AAA86870.1 | 2184 | GLATLGVWCFVVR   | TSISRM | -38.881 |
| >gi 975238 gb AAA86870.1 | 2189 | GVIWCFVVRTSISR  | MMLGTL | -34.563 |
| >gi 975238 gb AAA86870.1 | 2236 | TLLTVLQPEAGKQR  | SSDDNK | -26.314 |
| >gi 975238 gb AAA86870.1 | 2280 | KTKADLSTALWSER  | EEPRPW | -36.866 |
| >gi 975238 gb AAA86870.1 | 2284 | DLSTALWSEREPR   | PWSEWT | -33.22  |
| >gi 975238 gb AAA86870.1 | 2298 | PWSEWTNVDIQPAR  | SWGTYV | -28.869 |
| >gi 975238 gb AAA86870.1 | 2338 | LVNSAVASGAQAMR  | DLGGGA | -25.502 |
| >gi 975238 gb AAA86870.1 | 2394 | AIVVSGLEAELTQR  | AHKVFF | -34.159 |
| >gi 975238 gb AAA86870.1 | 2405 | TQRAHKVFFSAMVR  | NPMVDG | -31.262 |
| >gi 975238 gb AAA86870.1 | 2429 | PFGEGEAKPALYER  | KMSLVL | -42.196 |
| >gi 975238 gb AAA86870.1 | 2448 | LATVLCCLMSVMMNR | TVASIT | -27.729 |
| >gi 975238 gb AAA86870.1 | 2469 | ASAVGLAAAGQLLR  | PEADTL | -31.232 |
| >gi 975238 gb AAA86870.1 | 2489 | WTMPVACGMSGVVR  | GSLWGF | -27.902 |
| >gi 975238 gb AAA86870.1 | 2501 | VRGSLWGFLPLGHR  | LWLRAS | -35.739 |
| >gi 975238 gb AAA86870.1 | 2505 | LWGFLPLGHRLWLR  | ASGGRR | -2.99   |
| >gi 975238 gb AAA86870.1 | 2510 | PLGHRLWLRASGGR  | RGGSEG | -25.299 |
| >gi 975238 gb AAA86870.1 | 2511 | LGHRLWLRASGGRR  | GGSEGD | -16.207 |
| >gi 975238 gb AAA86870.1 | 2525 | GGSEGDTLGDWKR   | RLNNCT | -24.859 |
| >gi 975238 gb AAA86870.1 | 2526 | GSEGDTLGDWKR    | LNNCTR | -27.115 |
| >gi 975238 gb AAA86870.1 | 2532 | LGDLWKRRLNNCTR  | EEFFVY | -38.507 |
| >gi 975238 gb AAA86870.1 | 2539 | RLNNCTREEFFVYR  | RTGILE | -40.577 |
| >gi 975238 gb AAA86870.1 | 2540 | LNNCTREEFFVYRR  | TGILET | -25.755 |
| >gi 975238 gb AAA86870.1 | 2548 | FFVYRRTGILETER  | DKAREL | -42.265 |
| >gi 975238 gb AAA86870.1 | 2552 | RRTGILETERDKAR  | ELLRRG | -22.699 |



|                          |      |                  |        |         |
|--------------------------|------|------------------|--------|---------|
| >gi 975238 gb AAA86870.1 | 2556 | ILETERDKARELLR   | RGETNV | -22.522 |
| >gi 975238 gb AAA86870.1 | 2557 | LETERDKARELLRR   | GETNVG | -3.705  |
| >gi 975238 gb AAA86870.1 | 2568 | LRRGETNVGLAVSR   | GTAKLA | -23.856 |
| >gi 975238 gb AAA86870.1 | 2579 | VSRGTAKLAWLEER   | GYATLK | -44.265 |
| >gi 975238 gb AAA86870.1 | 2595 | ATLKGEVVDLGCCR   | GGWSYY | -41.406 |
| >gi 975238 gb AAA86870.1 | 2605 | GCGRGGWSYYAASR   | PAVMSV | -36.351 |
| >gi 975238 gb AAA86870.1 | 2612 | SYAASRPVMSVR     | AYTIGG | -29.57  |
| >gi 975238 gb AAA86870.1 | 2638 | KMVTSLGWNLKFR    | SGMDVF | -24.621 |
| >gi 975238 gb AAA86870.1 | 2650 | FRSGMDVFSMQPHR   | ADTVMC | -23.969 |
| >gi 975238 gb AAA86870.1 | 2671 | IGESSPDAAVEGER   | TRKVIL | -41.607 |
| >gi 975238 gb AAA86870.1 | 2673 | ESSPDAAVEGERTR   | KVILLM | -42.123 |
| >gi 975238 gb AAA86870.1 | 2685 | TRKVILLMEQWKNR   | NPTAAC | -35.733 |
| >gi 975238 gb AAA86870.1 | 2700 | PTAACVFKVLAPYR   | PEVIEA | -41.399 |
| >gi 975238 gb AAA86870.1 | 2709 | LAPYRPEVIEALHR   | FQLQWG | -35.457 |
| >gi 975238 gb AAA86870.1 | 2720 | LHRFQLQWGGGLVR   | TPFSRN | -31.168 |
| >gi 975238 gb AAA86870.1 | 2725 | LQWGGGLVRTPFSR   | NSTHEM | -21.368 |
| >gi 975238 gb AAA86870.1 | 2750 | VTGNIVNSVNVQSR   | KLLARF | -27.758 |
| >gi 975238 gb AAA86870.1 | 2755 | VNSVNVQSRKLLAR   | FGDQRG | 0.654   |
| >gi 975238 gb AAA86870.1 | 2760 | VQSRKLLARFGDQR   | GPTKVP | -26.056 |
| >gi 975238 gb AAA86870.1 | 2775 | PTKVPDLGVGTR     | CVVLAE | -21.046 |
| >gi 975238 gb AAA86870.1 | 2792 | LAEDKVKEQDVQER   | IRALRE | -45.374 |
| >gi 975238 gb AAA86870.1 | 2794 | EDKVKEQDVQERIR   | ALREQY | -31.457 |
| >gi 975238 gb AAA86870.1 | 2797 | VKEQDVQERIRALR   | EQYSET | 8.172   |
| >gi 975238 gb AAA86870.1 | 2813 | YSETWHMDEEHPYR   | TWQYWG | -36.662 |
| >gi 975238 gb AAA86870.1 | 2822 | EHPYRTWQYWGSYR   | TAPTGS | -39.433 |
| >gi 975238 gb AAA86870.1 | 2847 | NGVVKLLSWPWNAR   | EDVVRM | -32.684 |
| >gi 975238 gb AAA86870.1 | 2852 | LLSWPWNAREDVVR   | MAMTDT | -31.787 |
| >gi 975238 gb AAA86870.1 | 2865 | RMAMTDTTAFGQQR   | VFKDKV | -35.35  |
| >gi 975238 gb AAA86870.1 | 2883 | KVDTKAQEPQPGTR   | VIMRAV | -33.609 |
| >gi 975238 gb AAA86870.1 | 2887 | KAQEPQPGTRVIMR   | AVNDWI | -3.409  |
| >gi 975238 gb AAA86870.1 | 2896 | RVIMRAVNDWILER   | LAQKSK | -44.927 |
| >gi 975238 gb AAA86870.1 | 2904 | DWILERLAQKSKPR   | MCSREE | -21.895 |
| >gi 975238 gb AAA86870.1 | 2908 | ERLAQKSKPRMCSR   | EEFIAK | -28.316 |
| >gi 975238 gb AAA86870.1 | 2930 | SNAALGAWSDEQNR   | WASARE | -43.49  |
| >gi 975238 gb AAA86870.1 | 2935 | GAWSDEQNRWASAR   | EAVEDP | -19.951 |
| >gi 975238 gb AAA86870.1 | 2945 | ASAREAVEDPAFWR   | LVDEER | -41.157 |
| >gi 975238 gb AAA86870.1 | 2951 | VEDPAFWRLVDEER   | ERHLMG | -43.013 |
| >gi 975238 gb AAA86870.1 | 2953 | DPAFWRLVDEERER   | HLMGRC | -53.455 |
| >gi 975238 gb AAA86870.1 | 2958 | RLVDEERERHLMGR   | CAHCYV | -3.457  |
| >gi 975238 gb AAA86870.1 | 2970 | GRCACHCVYNNMMGKR | EKKLGE | -21.615 |
| >gi 975238 gb AAA86870.1 | 2984 | EKKLGEFGVAKGSR   | AIWYMW | -8.509  |
| >gi 975238 gb AAA86870.1 | 2994 | KGSRAIWYMWLGSR   | FLEFEA | -33.814 |
| >gi 975238 gb AAA86870.1 | 3012 | EALGFLNEDHWASR   | ESSGAG | -29.572 |

|                           |      |                |        |         |
|---------------------------|------|----------------|--------|---------|
| >gi 975238 gb AAA86870.1  | 3067 | VTNADLEDEEQILR | YMEGEH | -42.281 |
| >gi 975238 gb AAA86870.1  | 3094 | MQKAYHAKVVKVAR | PSRDGG | -7.006  |
| >gi 975238 gb AAA86870.1  | 3097 | AYHAKVVKVARPSR | DGGCIM | -3.071  |
| >gi 975238 gb AAA86870.1  | 3108 | PSRDGGCIMDVITR | RDQRGS | -34.188 |
| >gi 975238 gb AAA86870.1  | 3109 | SRDGGCIMDVITRR | DQRGSG | -13.652 |
| >gi 975238 gb AAA86870.1  | 3112 | GGCIMDVITRRDQR | GSGQVV | -9.942  |
| >gi 975238 gb AAA86870.1  | 3134 | ALNTLTNIKVQLIR | MMEGEG | -32.907 |
| >gi 975238 gb AAA86870.1  | 3151 | GEGVIEAADAHNPR | LLRVER | -31.407 |
| >gi 975238 gb AAA86870.1  | 3154 | VIEAADAHNPRLLR | VERWLK | -24.175 |
| >gi 975238 gb AAA86870.1  | 3157 | AADAHNPRLLRVER | WLKEHG | -21.667 |
| >gi 975238 gb AAA86870.1  | 3166 | LRVERWLKEHGEER | LGRMLV | -45.755 |
| >gi 975238 gb AAA86870.1  | 3169 | ERWLKEHGEERLGR | MLVSGD | -11.605 |
| >gi 975238 gb AAA86870.1  | 3180 | LGRMLVSGDDCVVR | PLDDRF | -44.022 |
| >gi 975238 gb AAA86870.1  | 3185 | VSGDDCVVRPLDDR | FGKALY | -33.989 |
| >gi 975238 gb AAA86870.1  | 3200 | GKALYFLNDMAKTR | KDIGEW | -41.246 |
| >gi 975238 gb AAA86870.1  | 3234 | CSHHFHELVMKDGR | TLVVPC | -31.827 |
| >gi 975238 gb AAA86870.1  | 3241 | LVMKDGRTLVVPCR | DQDELV | -25.61  |
| >gi 975238 gb AAA86870.1  | 3249 | LVVPCRDQDELVGR | ARISPG | -40.146 |
| >gi 975238 gb AAA86870.1  | 3251 | VPCRDQDELVGRAR | ISPGCG | -27.684 |
| >gi 975238 gb AAA86870.1  | 3261 | GRARISPGCGWSVR | ETACLS | -31.352 |
| >gi 975238 gb AAA86870.1  | 3281 | KAYQMWLLSYFHR  | RDLRTL | -28.79  |
| >gi 975238 gb AAA86870.1  | 3282 | AYGQMWLLSYFHRR | DLRTL  | -20.846 |
| >gi 975238 gb AAA86870.1  | 3285 | QMWLLSYFHRRDLR | TLGLAI | -15.966 |
| >gi 975238 gb AAA86870.1  | 3304 | INSAVPADWVPTGR | TTWSIH | -34.73  |
| >gi 975238 gb AAA86870.1  | 3327 | AWMTTEDMLDVWNR | VWILDN | -42.127 |
| >gi 975238 gb AAA86870.1  | 3341 | VWILDNPFMQNKER | VMEWRD | -43.012 |
| >gi 975238 gb AAA86870.1  | 3346 | NPFMQNKERVMEWR | DVPYLP | -22.175 |
| >gi 975238 gb AAA86870.1  | 3365 | PKAQDMLCSSLVGR | RERAEW | -32.018 |
| >gi 975238 gb AAA86870.1  | 3366 | KAQDMLCSSLVGR  | ERAewa | -13.938 |
| >gi 975238 gb AAA86870.1  | 3368 | QDMLCSSLVGRER  | AEWAKN | -11.599 |
| >gi 975238 gb AAA86870.1  | 3383 | EWAKNIWGAVEKVR | KMIGPE | -39.865 |
| >gi 975238 gb AAA86870.1  | 3400 | GPEKFKDYLSMDR  | HDLHWE | -38.753 |
| >gi 975238 gb AAA86870.1  | 3408 | LSCMDRHDLHWELR | LESSII | -36.894 |
| >gi 465412 sp P35253.1 VG | 69   | GQKVADSPLEASKR | WAFRTG | -24.206 |
| >gi 465412 sp P35253.1 VG | 73   | ADSPLEASKRWAFR | TGVPPK | -28.425 |
| >gi 465412 sp P35253.1 VG | 114  | SGKSLLLDPPTNIR | DYPKCK | -35.341 |
| >gi 465412 sp P35253.1 VG | 148  | IALHLWGAFFLYDR | IASTTM | -47.794 |
| >gi 465412 sp P35253.1 VG | 156  | FFLYDRIASTTMYR | GKVFTE | -31.841 |
| >gi 465412 sp P35253.1 VG | 181  | MIVNKTVHKMIFSR | QGGQYR | -19.622 |
| >gi 465412 sp P35253.1 VG | 187  | VHKMIFSRQGGQYR | HMNLT  | -37.434 |
| >gi 465412 sp P35253.1 VG | 239  | CAPSKIPPLPTAR  | PEIKLT | -31.125 |
| >gi 465412 sp P35253.1 VG | 276  | DEDLATSGSGSGER | EPHTTS | -33.658 |
| >gi 465412 sp P35253.1 VG | 432  | PTPSSTAQHLVYFR | RKRSIL | -28.51  |

|                           |     |                |         |         |
|---------------------------|-----|----------------|---------|---------|
| >gi 465412 sp P35253.1 VG | 433 | TPSSTAQHLYVFRR | KRSILW  | -25.57  |
| >gi 465412 sp P35253.1 VG | 440 | HLVYFRRKRSILWR | EGDMFP  | -16.006 |
| >gi 465412 sp P35253.1 VG | 517 | YSGENENDCDAELR | IWSVQE  | -45.825 |
| >gi 465412 sp P35253.1 VG | 558 | TAVLIKNQNNLVCR | LRRLAN  | -40.068 |
| >gi 465412 sp P35253.1 VG | 560 | VLIKNQNNLVCRLR | RLANQT  | -24.994 |
| >gi 465412 sp P35253.1 VG | 561 | LIKNQNNLVCRLRR | LANQTA  | -13.864 |
| >gi 465412 sp P35253.1 VG | 575 | LANQTAKSLELLLR | VTTEER  | -35.025 |
| >gi 465412 sp P35253.1 VG | 581 | KSLELLLRVTTEER | TFSLIN  | -44.211 |
| >gi 465412 sp P35253.1 VG | 588 | RVTTEERTFSLINR | HAI DFL | -29.559 |
| >gi 465412 sp P35253.1 VG | 597 | SLINRHAI DFLTR | WGGTCK  | -42.408 |
| >gi 465412 sp P35253.1 VG | 674 | LSIAVLIALSCICR | IFTKYI  | -42.447 |
| >gi 130579 sp P03316.1 PO | 22  | LGRRPFPAPTAMWR | PRRRRQ  | -36.283 |
| >gi 130579 sp P03316.1 PO | 24  | RRPFPAPTAMWRPR | RRRQAA  | -28.418 |
| >gi 130579 sp P03316.1 PO | 25  | RFPAPTAMWRPRR  | RRQAAP  | -17.806 |
| >gi 130579 sp P03316.1 PO | 26  | PFPAPTAMWRPRRR | RQAAPM  | -18.484 |
| >gi 130579 sp P03316.1 PO | 27  | FPAPTAMWRPRRRR | QAAPMP  | 15.653  |
| >gi 130579 sp P03316.1 PO | 35  | RPRRRRQAAPMPAR | NGLASQ  | -26.337 |
| >gi 130579 sp P03316.1 PO | 59  | TTAVSALVIGQATR | PQPPRP  | -34.45  |
| >gi 130579 sp P03316.1 PO | 64  | ALVIGQATRPPPR  | PRPPPR  | -21.506 |
| >gi 130579 sp P03316.1 PO | 66  | VIGQATRPPPRPR  | PPPRQK  | -25.106 |
| >gi 130579 sp P03316.1 PO | 70  | ATRPQPPRPPPR   | QKKQAP  | -16.632 |
| >gi 130579 sp P03316.1 PO | 103 | KKKKQPAKPKPGKR | QRMALK  | -16.56  |
| >gi 130579 sp P03316.1 PO | 105 | KKQPAKPKPGKRQR | MALKLE  | -3.884  |
| >gi 130579 sp P03316.1 PO | 114 | GKRQRMALKLEADR | LFDVKN  | -40.909 |
| >gi 130579 sp P03316.1 PO | 174 | AYDMEFAQLPVNMR | SEAFTY  | -29.249 |
| >gi 130579 sp P03316.1 PO | 202 | YNWHHGAVQYSGGR | FTIPRG  | -35.453 |
| >gi 130579 sp P03316.1 PO | 207 | GAVQYSGGRFTIPR | GVGGRG  | -17.657 |
| >gi 130579 sp P03316.1 PO | 212 | SGGRFTIPRGVGG  | GDSGRP  | -1.713  |
| >gi 130579 sp P03316.1 PO | 217 | TIPRGVGGRGDSGR | PIMDNS  | -25.087 |
| >gi 130579 sp P03316.1 PO | 225 | RGDSGRPIMDNSGR | VVAIVL  | -40.717 |
| >gi 130579 sp P03316.1 PO | 239 | VVAIVLGADEGTR  | TALSVV  | -46.2   |
| >gi 130579 sp P03316.1 PO | 285 | AMCLLGNVSFPCDR | PPTCYT  | -45.356 |
| >gi 130579 sp P03316.1 PO | 292 | VSFPCDRPPTCYTR | EPSRAL  | -27.103 |
| >gi 130579 sp P03316.1 PO | 296 | CDRPPTCYTREPSR | ALDILE  | -18.471 |
| >gi 130579 sp P03316.1 PO | 319 | NHEAYDTLLNAILR | CGSSGR  | -27.786 |
| >gi 130579 sp P03316.1 PO | 325 | TLLNAILRCGSSGR | SKRSVI  | -31.109 |
| >gi 130579 sp P03316.1 PO | 372 | IEQVWDEADDNTIR | IQ TSAQ | -48.389 |
| >gi 130579 sp P03316.1 PO | 393 | GYDQSGAASANKYR | YMSLKQ  | -36.256 |
| >gi 130579 sp P03316.1 PO | 420 | TMDDIKISTSGPCR | RLSYKG  | -30.535 |
| >gi 130579 sp P03316.1 PO | 421 | MDDIKISTSGPCRR | LSYKGY  | -26.467 |
| >gi 130579 sp P03316.1 PO | 456 | IVSSNSATSCTLAR | KIKPKF  | -37.241 |
| >gi 130579 sp P03316.1 PO | 465 | CTLARKIKPKFVGR | EKYDLP  | -19.825 |
| >gi 130579 sp P03316.1 PO | 485 | PVHGKKIPCTVYDR | LKETTA  | -43.577 |

|                           |      |                 |        |         |
|---------------------------|------|-----------------|--------|---------|
| >gi 130579 sp P03316.1 PO | 498  | RLKETTAGYITMHR  | PRPHAY | -33.753 |
| >gi 130579 sp P03316.1 PO | 500  | KETTAGYITMHRPR  | PHAYTS | -18.088 |
| >gi 130579 sp P03316.1 PO | 542  | CKCGDYKTGTVSTR  | TEITGC | -31.401 |
| >gi 130579 sp P03316.1 PO | 573  | DQTKWVFNSPDLIR  | HDDHTA | -35.96  |
| >gi 130579 sp P03316.1 PO | 626  | LQLDTHLTLTTR    | RLGANP | -25.148 |
| >gi 130579 sp P03316.1 PO | 627  | QLDTHLTLTTRR    | LGANPE | -22.951 |
| >gi 130579 sp P03316.1 PO | 645  | PEPTTEWIVGKTVR  | NFTVDR | -9.964  |
| >gi 130579 sp P03316.1 PO | 651  | WIVGKTVRNFTVDR  | DGLEYI | -39.271 |
| >gi 130579 sp P03316.1 PO | 665  | DGLEYIWGNHEPVR  | VYAQES | -38.903 |
| >gi 130579 sp P03316.1 PO | 690  | HGWPHEIVQHYYHR  | HPVYTI | -29.277 |
| >gi 130579 sp P03316.1 PO | 721  | IGVTVAVLCAACKAR | RECLTP | -38.542 |
| >gi 130579 sp P03316.1 PO | 722  | GVTAVLCAACKARR  | ECLTPY | -19.021 |
| >gi 130579 sp P03316.1 PO | 747  | AVIPTSLALLCCVR  | SANAET | -29.966 |
| >gi 130579 sp P03316.1 PO | 785  | QLCIPLAAFIVLMR  | CCSCCL | -31.531 |
| >gi 130579 sp P03316.1 PO | 827  | PNVPQIPYKALVER  | AGYAPL | -28.041 |
| >gi 130579 sp P03316.1 PO | 940  | AIKVHTAAMKVGLR  | IVYGNT | -25.379 |
| >gi 130579 sp P03316.1 PO | 987  | ASFTPFDHKVVHR   | GLVYNY | -3.323  |
| >gi 130579 sp P03316.1 PO | 1026 | SLTSKDLIASTDIR  | LLKPSA | -38.993 |
| >gi 130579 sp P03316.1 PO | 1055 | ASSGFEMWKNNSSGR | PLQETA | -23.253 |
| >gi 130579 sp P03316.1 PO | 1073 | TAPFGCKIAVNPLR  | AVDCSY | -22.695 |
| >gi 130579 sp P03316.1 PO | 1095 | IPISIDIPNAAFIR  | TSDAPL | -37.89  |
| >gi 130579 sp P03316.1 PO | 1130 | DFGGMATLQYVSDR  | EGQCPV | -37.338 |
| >gi 130579 sp P03316.1 PO | 1244 | LMIFACSMMLTSTR  | R----  | -36.453 |
| >gi 130577 sp P03315.1 PO | 21   | TFYGRRWRPRPAAR  | PWPLQA | -22.39  |
| >gi 130577 sp P03315.1 PO | 55   | MQQLISAVNALTMR  | QNAIAP | -33.432 |
| >gi 130577 sp P03315.1 PO | 63   | NALTMRQNAIAPAR  | PPKPKK | -26.052 |
| >gi 130577 sp P03315.1 PO | 108  | DKQADKKKKKPGKR  | ERMCMK | -13.174 |
| >gi 130577 sp P03315.1 PO | 110  | QADKKKKKPGKRER  | MCMKIE | -18.056 |
| >gi 130577 sp P03315.1 PO | 178  | KYDLECAQIPVHMR  | SDASKY | -29.468 |
| >gi 130577 sp P03315.1 PO | 206  | YNWHHGAVQYSGGR  | FTIPTG | -36.081 |
| >gi 130577 sp P03315.1 PO | 221  | TIPTGAGKPGDSGR  | PIFDNK | -31.229 |
| >gi 130577 sp P03315.1 PO | 229  | PGDSGRPIFDNKGR  | VVAIVL | -41.665 |
| >gi 130577 sp P03315.1 PO | 243  | VVAIVLGGANEGSR  | TALSVV | -38.937 |
| >gi 130577 sp P03315.1 PO | 258  | ALSVVTWNKDMVTR  | VTPEGS | -33.012 |
| >gi 130577 sp P03315.1 PO | 304  | VPCCYENNAEATLR  | MLEDNV | -28.179 |
| >gi 130577 sp P03315.1 PO | 312  | AEATLRMLEDNVDR  | PGYYDL | -57.357 |
| >gi 130577 sp P03315.1 PO | 326  | PGYYDLLQAALTCR  | NGTRHR | -31.184 |
| >gi 130577 sp P03315.1 PO | 330  | DLLQAALTCRNGTR  | HRRSVS | -30.765 |
| >gi 130577 sp P03315.1 PO | 332  | LQAALTCRNGTRHR  | RSVSQH | -22.993 |
| >gi 130577 sp P03315.1 PO | 346  | RSVSQHFNVYKATR  | PYIAYC | -25.096 |
| >gi 130577 sp P03315.1 PO | 371  | GHSCHSPVAIEAVR  | SEATDG | -34.17  |
| >gi 130577 sp P03315.1 PO | 401  | GIDKSDNHDTYKIR  | YADGHA | -38.353 |
| >gi 130577 sp P03315.1 PO | 413  | IRYADGHAIENAVR  | SSLKVA | -35.761 |

|                           |      |                 |        |         |
|---------------------------|------|-----------------|--------|---------|
| >gi 130577 sp P03315.1 PO | 452  | PPGEFLQVSIQDTR  | NAVRAC | -28.013 |
| >gi 130577 sp P03315.1 PO | 456  | FLQVSIQDTRNAVR  | ACRIQY | -21.756 |
| >gi 130577 sp P03315.1 PO | 459  | VSIQDTRNAVRACR  | IQYHHD | -23.287 |
| >gi 130577 sp P03315.1 PO | 471  | CRIQYHHDQPVGVR  | EKFTIR | -25.487 |
| >gi 130577 sp P03315.1 PO | 477  | HDPQVPGREKFTIR  | PHYGKE | -36.156 |
| >gi 130577 sp P03315.1 PO | 511  | EEIDMHMPPDTPDR  | TLLSQQ | -46.889 |
| >gi 130577 sp P03315.1 PO | 577  | DHKKWQFNPFVPR   | ADEPAR | -22.826 |
| >gi 130577 sp P03315.1 PO | 583  | FNSPFVPRADEPAR  | KGKVHI | -43.91  |
| >gi 130577 sp P03315.1 PO | 599  | KVHIPPLDNITCR   | VPMARE | -38.742 |
| >gi 130577 sp P03315.1 PO | 604  | FPLDNITCRVPMAR  | EPTVIH | -18.226 |
| >gi 130577 sp P03315.1 PO | 613  | VPMAREPTVIHGKR  | EVTLHL | 4       |
| >gi 130577 sp P03315.1 PO | 630  | LHLHPDHPTLFSYR  | TLGEDP | -33.934 |
| >gi 130577 sp P03315.1 PO | 649  | PQYHEEWVTAVER   | TIPVPV | -39.399 |
| >gi 130577 sp P03315.1 PO | 669  | DGMEYHWGNNDPVR  | LWSQLT | -43.004 |
| >gi 130577 sp P03315.1 PO | 725  | ISIFASCYMLVAAR  | SKCLTP | -21.735 |
| >gi 130577 sp P03315.1 PO | 752  | AVPWTGLILCCAPR  | AHAASV | -39.347 |
| >gi 130577 sp P03315.1 PO | 792  | APVACILIITYCLR  | NVLCCC | -40.046 |
| >gi 130577 sp P03315.1 PO | 814  | LSFLVLLSLGATAR  | AYEHST | -28.254 |
| >gi 130577 sp P03315.1 PO | 836  | PNVVGFPYKAHIER  | PGYSPL | -27.866 |
| >gi 130577 sp P03315.1 PO | 925  | DSENTQLSEAYVDR  | SDVCRH | -40.11  |
| >gi 130577 sp P03315.1 PO | 930  | QLSEAYVDRSDVCR  | HDHASA | -29.402 |
| >gi 130577 sp P03315.1 PO | 949  | AYKAHTASLKAKVR  | VMYGNV | -32.412 |
| >gi 130577 sp P03315.1 PO | 1014 | NQDFPPYGSQPGR   | FGDIQS | -23.009 |
| >gi 130577 sp P03315.1 PO | 1021 | GSGQPGRFGDIQSR  | TVESND | -29.307 |
| >gi 130577 sp P03315.1 PO | 1038 | SNDLYANTALKLAR  | PSPGMV | -6.621  |
| >gi 130577 sp P03315.1 PO | 1082 | KAPFGCQIKTNPVR  | AMNCAV | -28.661 |
| >gi 130577 sp P03315.1 PO | 1104 | IPVSMNLPDSAFTR  | IVEAPT | -37.988 |
| >gi 130577 sp P03315.1 PO | 1188 | SASPSFVVSLSAR   | ATCSAS | -22.431 |
| >gi 130577 sp P03315.1 PO | 1252 | AILLVVVVTCIGLR  | R----- | -38.294 |
| >gi 62291022 sp P69697.1  | 49   | VCFITKALGISYGR  | KKRRQR | -34.059 |
| >gi 62291022 sp P69697.1  | 52   | ITKALGISYGRKKR  | RQRRRP | 8.069   |
| >gi 62291022 sp P69697.1  | 53   | TKALGISYGRKKRR  | QRRRPP | 8.731   |
| >gi 62291022 sp P69697.1  | 55   | ALGISYGRKKRRQR  | RRPPQG | 8.32    |
| >gi 62291022 sp P69697.1  | 57   | GISYGRKKRRQRRR  | PPQGSQ | -5.528  |
| >gi 62291022 sp P69697.1  | 78   | HQVLSKQPTSQSR   | GDPTGP | -25.325 |
| >gi 113485 sp P09167.2 AE | 33   | QAQAAEPVVPDQLR  | LFSLGQ | -41.127 |
| >gi 113485 sp P09167.2 AE | 47   | LFSLGQGVCGDKYR  | PVNREE | -41.884 |
| >gi 113485 sp P09167.2 AE | 51   | GQGVCGDKYRPVNR  | EEAQSV | -25.928 |
| >gi 113485 sp P09167.2 AE | 127  | LDIPDGDEV DVQWR | LVHDSA | -35.742 |
| >gi 113485 sp P09167.2 AE | 167  | NHSQYVGEDMDVTR  | DGDGWV | -40.878 |
| >gi 113485 sp P09167.2 AE | 175  | DMDVTRDGDGWVIR  | GNNDDG | -35.689 |
| >gi 113485 sp P09167.2 AE | 186  | VIRGNDDGGCDGYR  | CGDKTA | -44.747 |
| >gi 113485 sp P09167.2 AE | 217  | PDSFKHGDVTQSDR  | QLVKTV | -31.184 |

|                           |     |                  |         |         |
|---------------------------|-----|------------------|---------|---------|
| >gi 113485 sp P09167.2 AE | 243 | DSDTPQSGYDVTLR   | YDTATN  | -30.467 |
| >gi 113485 sp P09167.2 AE | 305 | NGGSTTTTSLSQSVR  | PTVPAR  | -22.843 |
| >gi 113485 sp P09167.2 AE | 311 | TSLSQSVRPTVPAR   | SKIPVK  | -16.466 |
| >gi 113485 sp P09167.2 AE | 346 | ADVSYDLTSLGFLR   | WGGNAW  | -33.711 |
| >gi 113485 sp P09167.2 AE | 359 | RWGGNAWYTHPDNR   | PNWNHT  | -35.254 |
| >gi 113485 sp P09167.2 AE | 379 | FVIGPYKDKASSIR   | YQWDKR  | -28.711 |
| >gi 113485 sp P09167.2 AE | 385 | KDKASSIRYQWDKR   | YIPGEV  | -27.375 |
| >gi 113485 sp P09167.2 AE | 414 | QQNGLSTMQNNLAR   | VLRPVR  | -32.19  |
| >gi 113485 sp P09167.2 AE | 417 | GLSTMQNNLARVLR   | PVRAGI  | -0.348  |
| >gi 113485 sp P09167.2 AE | 420 | TMQNNLARVLRPVR   | AGITGD  | -3.266  |
| >gi 113485 sp P09167.2 AE | 452 | IGAPVPLAADSKVR   | RARSVD  | -33.137 |
| >gi 113485 sp P09167.2 AE | 453 | GAPVPLAADSKVRR   | ARSVDG  | -2.943  |
| >gi 113485 sp P09167.2 AE | 465 | RRARSVDGAGQGLR   | LEIPLD  | -36.468 |
| >gi 913139 gb AAB32892.1  | 72  | DLKAKIIQDPEFIR   | NWANVA  | -46.3   |
| >gi 913139 gb AAB32892.1  | 102 | TANPNVGGQGFEFKR  | EVGAGG  | -19.508 |
| >gi 913139 gb AAB32892.1  | 117 | VGAGGKVSYLLSAR   | YNPNDP  | -28.86  |
| >gi 913139 gb AAB32892.1  | 129 | ARYNPNDPYASGYR   | AKDRLS  | -32.013 |
| >gi 913139 gb AAB32892.1  | 133 | PNDPYASGYRAKDR   | LSMKIS  | -32.053 |
| >gi 913139 gb AAB32892.1  | 142 | RAKDRLSMKISNVR   | FVIDND  | -20.386 |
| >gi 913139 gb AAB32892.1  | 261 | TTYTATVSPQTKKR   | LFLDVL  | -26.811 |
| >gi 913139 gb AAB32892.1  | 292 | IYMEYDIELMGFLR   | YTG NAR | -28.816 |
| >gi 913139 gb AAB32892.1  | 298 | IELMGFLRYTG NAR  | EDHTED  | -29.264 |
| >gi 913139 gb AAB32892.1  | 305 | RYTG NAREDHTEDR  | PTVKLK  | -42.263 |
| >gi 913139 gb AAB32892.1  | 361 | GYLFKNSYDALTSR   | KLGGII  | -35.417 |
| >gi 913139 gb AAB32892.1  | 382 | GSFTNINGTKIVIR   | EGKEIP  | -8.36   |
| >gi 913139 gb AAB32892.1  | 394 | IREGKEIPLPDKKR   | RGKRSV  | -20.747 |
| >gi 913139 gb AAB32892.1  | 395 | REGKEIPLPDKKRR   | GKRSVD  | 4.517   |
| >gi 913139 gb AAB32892.1  | 406 | KRRGKRSVDSL D AR | LQNEGI  | -42.535 |
| >gi 913139 gb AAB32892.1  | 413 | VDSL D ARLQNEGIR | IENIET  | -41.281 |
| >gi 913139 gb AAB32892.1  | 426 | RIENIETQDVP GFR  | LNSITY  | -42.063 |
| >gi 118949 sp P00588.2 DT | 158 | PLMEQVGT EEFIKR  | FGDGAS  | -28.439 |
| >gi 118949 sp P00588.2 DT | 165 | TEEFIKRFGDGASR   | VVLSLP  | -39.08  |
| >gi 118949 sp P00588.2 DT | 202 | KALSVELEINFETR   | GKRGQD  | -35.431 |
| >gi 118949 sp P00588.2 DT | 205 | SVELEINFETR GKR  | GQDAMY  | -0.972  |
| >gi 118949 sp P00588.2 DT | 222 | AMYEYMAQACAGNR   | VRRSVG  | -35.208 |
| >gi 118949 sp P00588.2 DT | 224 | YEYMAQACAGNRVR   | RSVGSS  | -24.873 |
| >gi 118949 sp P00588.2 DT | 242 | SSLSCINLDWDVIR   | DKTKTK  | -47.744 |
| >gi 118949 sp P00588.2 DT | 409 | IINLFQVVHNSYNR   | PAYSPG  | -31.572 |
| >gi 118949 sp P00588.2 DT | 439 | YAVSWNTVEDSIIR   | TGFQGE  | -47.049 |
| >gi 118949 sp P00588.2 DT | 487 | DVNKSKTHISVNGR   | KIRMRC  | -32.117 |
| >gi 118949 sp P00588.2 DT | 490 | KSKTHISVNGRKIR   | MRCRAI  | -8.992  |
| >gi 118949 sp P00588.2 DT | 492 | KTHISVNGRKIRM R  | CRAIDG  | -1.703  |
| >gi 118949 sp P00588.2 DT | 494 | HISVNGRKIRMRCR   | AIDGDV  | -25.872 |

|                           |     |                 |        |         |
|---------------------------|-----|-----------------|--------|---------|
| >gi 118949 sp P00588.2 DT | 504 | MRCRAIDGDVTFGR  | PKSPVY | -43.009 |
| >gi 118949 sp P00588.2 DT | 525 | GNGVHANLHVAFHR  | SSSEKI | -19.665 |
| >gi 12231043 sp P11439.2  | 49  | CAKACVLDLKDGVR  | SSRMSV | -22.495 |
| >gi 12231043 sp P11439.2  | 52  | ACVLDLKDGVRRSSR | MSVDPA | 0.483   |
| >gi 12231043 sp P11439.2  | 99  | DNALSITSDGLTIR  | LEGGVE | -40.441 |
| >gi 12231043 sp P11439.2  | 111 | IRLEGGVEPNKPVR  | YSYTRQ | -8.453  |
| >gi 12231043 sp P11439.2  | 116 | GVEPNKPVRYSTR   | QARGSW | -27.44  |
| >gi 12231043 sp P11439.2  | 119 | PNKPVRYSTRQAR   | GSWSLN | 0.698   |
| >gi 12231043 sp P11439.2  | 172 | TIEMGDELLAKLAR  | DATFFV | -2.755  |
| >gi 12231043 sp P11439.2  | 179 | LLAKLARDATFFVR  | AHESNE | -31.834 |
| >gi 12231043 sp P11439.2  | 207 | HAGVSVVMAQAQPR  | REKRWS | -32.357 |
| >gi 12231043 sp P11439.2  | 208 | AGVSVVMAQAQPRR  | EKRWSE | -15.284 |
| >gi 12231043 sp P11439.2  | 211 | SVVMAQAQPRREKR  | WSEWAS | -5.979  |
| >gi 12231043 sp P11439.2  | 238 | DPLDGVYNYLAQQR  | CNLDDT | -29.413 |
| >gi 12231043 sp P11439.2  | 251 | RCNLDDTWEGKIYR  | VLAGNP | -31.768 |
| >gi 12231043 sp P11439.2  | 272 | KHDLDIKPTVISHR  | LHFPEG | -29.423 |
| >gi 12231043 sp P11439.2  | 299 | AHQACHLPLETFTR  | HRQPRG | -36.263 |
| >gi 12231043 sp P11439.2  | 301 | QACHLPLETFTRHR  | QPRGWE | -26.152 |
| >gi 12231043 sp P11439.2  | 318 | GWEQLEQCGYPVQR  | LVALYL | -36.342 |
| >gi 12231043 sp P11439.2  | 327 | YPVQRLVALYLAAR  | LSWNQV | -36.36  |
| >gi 12231043 sp P11439.2  | 338 | AARLSWNQVDQVIR  | NALASP | -34.673 |
| >gi 12231043 sp P11439.2  | 355 | ASPGSGGDLGEAIR  | EQPEQA | -34.585 |
| >gi 12231043 sp P11439.2  | 362 | DLGEAIREQPEQAR  | LALTLA | -34.261 |
| >gi 12231043 sp P11439.2  | 374 | ARLALTLAAAESER  | FVRQGT | -34.698 |
| >gi 12231043 sp P11439.2  | 377 | ALTLLAAAESERFVR | QGTGND | -7.661  |
| >gi 12231043 sp P11439.2  | 417 | CAGPADSGDALLER  | NYPTGA | -48.562 |
| >gi 12231043 sp P11439.2  | 437 | EFLDGGDISFSTR   | GTQNWT | -29.148 |
| >gi 12231043 sp P11439.2  | 446 | SFSTRGTQNWTVR   | LLQHR  | -42.715 |
| >gi 12231043 sp P11439.2  | 452 | TQNWTVERLLQHR   | QLEERG | -20.749 |
| >gi 12231043 sp P11439.2  | 457 | VERLLQHRQLEER   | GYVFGV | -33.406 |
| >gi 12231043 sp P11439.2  | 481 | FLEAAQSIVFGGVR  | ARSQDL | -32.537 |
| >gi 12231043 sp P11439.2  | 483 | EAAQSIVFGGVRAR  | SQDLDA | -15.51  |
| >gi 12231043 sp P11439.2  | 492 | GVRARSQDLDAIWR  | GFYIAG | -39.652 |
| >gi 12231043 sp P11439.2  | 515 | LAYGYAQDQEPDAR  | GRIRNG | -38.763 |
| >gi 12231043 sp P11439.2  | 517 | YGYAQDQEPDARGR  | IRNGAL | -35.768 |
| >gi 12231043 sp P11439.2  | 519 | Y AQDQEPDARGRIR | NGALLR | -22.812 |
| >gi 12231043 sp P11439.2  | 525 | PDARGRIRNGALLR  | VYVPRS | -37.299 |
| >gi 12231043 sp P11439.2  | 530 | RIRNGALLRVYVPR  | SSLPGF | -14.497 |
| >gi 12231043 sp P11439.2  | 538 | RVYVPRSSLPGFYR  | TGLTLA | -38.757 |
| >gi 12231043 sp P11439.2  | 554 | LTLAAPEAAGEVER  | LIGHPL | -44.326 |
| >gi 12231043 sp P11439.2  | 563 | GEVERLIGHPLPLR  | LDAITG | -32.772 |
| >gi 12231043 sp P11439.2  | 576 | RLDAITGPEEEGGR  | LETILG | -50.379 |
| >gi 12231043 sp P11439.2  | 588 | GRLETILGWPLAER  | TVVIPS | -39.17  |

|                           |     |                |        |         |
|---------------------------|-----|----------------|--------|---------|
| >gi 12231043 sp P11439.2  | 601 | RTVVIPSAIPTDPR | NVGGDL | -35.713 |
| >gi 12231043 sp P11439.2  | 634 | ALPDYASQPGKPPR | EDLK-- | -4.895  |
| >gi 17380160 sp P13423.2  | 36  | NLEVIQAEVKQENR | LLNESE | -26.061 |
| >gi 17380160 sp P13423.2  | 136 | QEVINKASNSNKIR | LEKGRL | -36.626 |
| >gi 17380160 sp P13423.2  | 141 | KASNSNKIRLEKGR | LYQIKI | -33.386 |
| >gi 17380160 sp P13423.2  | 151 | EKGRLYQIKIQYQR | ENPTEK | -19.89  |
| >gi 17380160 sp P13423.2  | 193 | LQLPELKQKSSNSR | KKRSTS | -26.943 |
| >gi 17380160 sp P13423.2  | 207 | KKRSTSAGPTVPDR | DNDGIP | -29.724 |
| >gi 17380160 sp P13423.2  | 229 | LEVEGYTVDVKNKR | TFLSPW | -14.06  |
| >gi 17380160 sp P13423.2  | 271 | ASDPYSDFEKVTGR | IDKNVS | -27.508 |
| >gi 17380160 sp P13423.2  | 281 | VTGRIDKNVSPEAR | HPLVAA | -26.934 |
| >gi 17380160 sp P13423.2  | 316 | NEDQSTQNTDSQTR | TISKNT | -37.403 |
| >gi 17380160 sp P13423.2  | 326 | SQTRTISKNTSTSR | THTSEV | -35.111 |
| >gi 17380160 sp P13423.2  | 373 | TVAIDHSLSLAGER | TWAETM | -41.717 |
| >gi 17380160 sp P13423.2  | 388 | WAETMGLNTADTAR | LNANIR | -35.188 |
| >gi 17380160 sp P13423.2  | 394 | LNTADTARLNANIR | YVNTGT | -30.506 |
| >gi 17380160 sp P13423.2  | 478 | YNQFLELEKTKQLR | LDTDQV | -20.199 |
| >gi 17380160 sp P13423.2  | 497 | VYGNIATYNFENGR | VRVDTG | -40.915 |
| >gi 17380160 sp P13423.2  | 499 | GNIATYNFENGRVR | VDTGSN | -35.994 |
| >gi 17380160 sp P13423.2  | 519 | WSEVLPQIQETTAR | IIFNGK | -37.024 |
| >gi 17380160 sp P13423.2  | 532 | RIIFNGKDLNLVER | RIAAVN | -35.865 |
| >gi 17380160 sp P13423.2  | 533 | IIFNGKDLNLVERR | IAAVNP | -19.483 |
| >gi 17380160 sp P13423.2  | 621 | DKIKLNAKMNILIR | DKRFHY | -26.478 |
| >gi 17380160 sp P13423.2  | 624 | KLNAKMNILIRDKR | FHYDRN | 0.42    |
| >gi 17380160 sp P13423.2  | 629 | MNILIRDKRFHYDR | NNIAVG | -28.994 |
| >gi 17380160 sp P13423.2  | 646 | AVGADESVVKEAHR | EVINSS | -22.749 |
| >gi 17380160 sp P13423.2  | 665 | STEGLLLIDKDIR  | KILSGY | -37.825 |
| >gi 17380160 sp P13423.2  | 688 | IEDTEGLKEVINDR | YDMLNI | -40.551 |
| >gi 17380160 sp P13423.2  | 698 | INDRYDMLNISSLR | QDGKTF | -28.07  |
| >gi 9955819 emb CAC05622. | 43  | STAKTYVDSLNVIR | SAIGTP | -26.305 |
| >gi 9955819 emb CAC05622. | 77  | DSGAGDNLFAVDVR | GIDPEE | -28.467 |
| >gi 9955819 emb CAC05622. | 85  | FAVDVRGIDPEEGR | FNNLRL | -39.609 |
| >gi 9955819 emb CAC05622. | 90  | RGIDPEEGRFNNLR | LIVERN | -29.426 |
| >gi 9955819 emb CAC05622. | 95  | EEGRFNNLRLIVER | NNLYVT | -22.958 |
| >gi 9955819 emb CAC05622. | 106 | VERNLYVTGFVNR  | TNNVfy | -34.706 |
| >gi 9955819 emb CAC05622. | 113 | VTGFVNRTNNVfyR | FADFSH | -24.779 |
| >gi 9955819 emb CAC05622. | 141 | VTLSGDSSYTTLQR | VAGISR | -33.065 |
| >gi 9955819 emb CAC05622. | 147 | SSYTTLQRVAGISR | TGMQIN | -33.805 |
| >gi 9955819 emb CAC05622. | 154 | RVAGISRTGMQINR | HSLTTS | -25.53  |
| >gi 9955819 emb CAC05622. | 178 | MSHSGTSLTQSVAR | AMLRfv | -31.648 |
| >gi 9955819 emb CAC05622. | 182 | GTSLTQSVARAMLR | FVTvTA | -16.93  |
| >gi 9955819 emb CAC05622. | 192 | AMLRfvTVTAeALR | FRQIQR | -32.675 |
| >gi 9955819 emb CAC05622. | 194 | LRfvTVTAeALRfR | QIQRGF | -36.131 |



|                           |     |                |        |         |
|---------------------------|-----|----------------|--------|---------|
| >gi 9955819 emb CAC05622. | 198 | TVTAEALRFQIQR  | GFRTTL | -19.642 |
| >gi 9955819 emb CAC05622. | 201 | AEALRFQIQGFR   | TTLDDL | -19.28  |
| >gi 9955819 emb CAC05622. | 210 | QRGFRTTLDDLGR  | SYVMTA | -43.621 |
| >gi 9955819 emb CAC05622. | 227 | MTAEDVDLTLNWGR | LSSVLP | -35.125 |
| >gi 9955819 emb CAC05622. | 242 | SSVLPDYHGQDSVR | VGRISF | -39.186 |
| >gi 9955819 emb CAC05622. | 245 | LPDYHGQDSVRVGR | ISFGSI | -15.608 |
| >gi 9955819 emb CAC05622. | 270 | SVALILNCHHHASR | VARMAS | -23.771 |
| >gi 9955819 emb CAC05622. | 288 | ASDEFPSMCPADGR | VRGITH | -35.816 |
| >gi 9955819 emb CAC05622. | 290 | DEFPSMCPADGRVR | GITHNK | -30.679 |
| >gi 9955819 emb CAC05622. | 310 | ILWDSSTLGAILMR | RTISS- | -24.657 |
| >gi 9955819 emb CAC05622. | 311 | LWDSSTLGAILMRR | TISS-- | -22.091 |
